# Supplementary material for: Corticothalamic gating of population auditory thalamocortical transmission in mouse
Source: eLife. 2021 May 24;10:e56645. doi: 10.7554/eLife.56645 (PMC8186908; doi:10.7554/eLife.56645)
Supplement: Figure 1—source data 1. [file elife-56645-fig1-data1.xlsx]

## Sheet: Figure 1D, E, and F
	Figure 1D			Histogram data points (Figure 1E)			Figure 1F
	Trial #	Df/f (Cortex)		Bin centers	Counts of cortical responses		Sound level (dB SPL)	% of population ON-responses
	1	6.91368		-3.5	0		37	52.5
	2	-0.88235		-2.5	0		44-60	71.6
	3	6.23984		-1.5	16		65-70	85
	4	-1.9855		-0.5	3		75-80	100
	5	4.87156		0.5	2
	6	-1.93892		1.5	0
	7	-1.48071		2.5	0
	8	0.15038		3.5	4
	9	-2		4.5	4
	10	3.55473		5.5	2
	11	-1.94483		6.5	8
	12	-1.9132		7.5	1
	13	0.55098
	14	-1.36523
	15	5.80309
	16	4.98388
	17	-1.94215
	18	6.23838
	19	5.23468
	20	6.70227
	21	-1.94223
	22	-0.70898
	23	-1.94431
	24	6.98139
	25	-0.30073
	26	-1.94223
	27	-1.94223
	28	6.77216
	29	4.74509
	30	6.94598
	31	4.87504
	32	7
	33	6.93874
	34	3.30616
	35	-1.60445
	36	-1.94273
	37	-1.89597
	38	3.36275
	39	-1.94264
	40	3.43535
