# Supplementary material for: Corticothalamic gating of population auditory thalamocortical transmission in mouse
Source: eLife. 2021 May 24;10:e56645. doi: 10.7554/eLife.56645 (PMC8186908; doi:10.7554/eLife.56645)
Supplement: Figure 2—figure supplement 2—source data 1. [file elife-56645-fig2-figsupp2-data1.xlsx]

## Sheet: Figure 2-figure supplement 2
	FA-signals				Ca-signals
Time (s)	AC (Df/f)	Z-score		Time (s)	AC (Df/f)	Z-score
0.025	-0.23474	-0.12253		0.25	-0.06347	-1.31358
0.05	-0.21695	-0.02083		0.5	-0.03144	-0.90839
0.075	-0.20473	0.04899		0.75	0.00413	-0.4583
0.1	-0.20606	0.04143		1	-0.02315	-0.80351
0.125	-0.21483	-0.00872		1.25	0.11725	0.97293
0.15	-0.23229	-0.10851		1.5	0.15392	1.43699
0.175	-0.24993	-0.20934		1.75	0.07863	0.48429
0.2	-0.26509	-0.29605		2	0.08695	0.58957
0.225	-0.2961	-0.47329		2.25	0.49167	5.71043
0.25	-0.32655	-0.64737		2.5	3.64017	45.5478
0.275	-0.34647	-0.76123		2.75	8.25636	103.956
0.3	-0.37746	-0.93842		3	11.4799	144.743
0.325	-0.40912	-1.11939		3.25	13.0399	164.48
0.35	-0.41825	-1.17156		3.5	12.0408	151.84
0.375	-0.43207	-1.25056		3.75	9.59429	120.884
0.4	-0.44814	-1.34244		4	6.89068	86.6759
0.425	-0.4558	-1.3862		4.25	4.26309	53.4295
0.45	-0.46283	-1.42639		4.5	1.30749	16.0328
0.475	-0.46777	-1.45465		4.75	-0.93336	-12.3202
0.5	-0.48198	-1.53591		5	-3.11891	-39.9735
0.525	-0.48938	-1.57821		5.25	-4.74592	-60.5598
0.55	-0.47916	-1.51979		5.5	-5.81675	-74.1087
0.575	-0.46157	-1.41923		5.75	-6.22136	-79.2283
0.6	-0.44602	-1.33032		6	-6.40428	-81.5427
0.625	-0.41596	-1.15849		6.25	-5.99062	-76.3087
0.65	-0.38369	-0.97402		6.5	-5.44424	-69.3955
0.675	-0.33898	-0.71843		6.75	-4.689	-59.8396
0.7	-0.30382	-0.51743		7	-3.93701	-50.3247
0.725	-0.26968	-0.32226		7.25	-3.40707	-43.6196
0.75	-0.22837	-0.08612		7.5	-2.88192	-36.9749
0.775	-0.17299	0.23044		7.75	-2.28755	-29.4545
0.8	-0.1315	0.4676		8	-1.89518	-24.4899
0.825	-0.13177	0.46608		8.25	-1.63648	-21.2166
0.85	-0.11005	0.59028		8.5	-1.2963	-16.9124
0.875	-0.07325	0.80061		8.75	-1.10416	-14.4813
0.9	-0.12678	0.49462		9	-0.95704	-12.6198
0.925	-0.12189	0.52255		9.25	-0.81081	-10.7696
0.95	-0.11569	0.55803		9.5	-0.57375	-7.7701
0.975	-0.16054	0.30161		9.75	-0.50877	-6.94792
1	-0.20583	0.04275		10	-0.4984	-6.81671
1.025	-0.19757	0.08994		10.25	-0.45507	-6.2685
1.05	-0.18283	0.1742		10.5	-0.35597	-5.0146
1.075	-0.18365	0.16952		10.75	-0.21436	-3.22283
1.1	-0.17594	0.21357		11	-0.20628	-3.12062
1.125	-0.15399	0.33904		11.25	-0.04481	-1.07757
1.15	-0.15033	0.36001		11.5	-0.21876	-3.27843
1.175	-0.15358	0.34144		11.75	-0.23689	-3.50795
1.2	-0.12658	0.49575		12	-0.10619	-1.85413
1.225	-0.12018	0.53235		12.25	0.00258	-0.47787
1.25	-0.1167	0.55225		12.5	0.04228	0.02444
1.275	-0.0998	0.64884		12.75	0.64791	7.68736
1.3	-0.09085	0.70002		13	3.46352	43.3126
1.325	-0.09919	0.65236		13.25	6.19966	77.9325
1.35	-0.10202	0.63616		13.5	8.13491	102.419
1.375	-0.11392	0.56813		13.75	6.87632	86.4941
1.4	-0.14264	0.40394		14	5.07974	63.7624
1.425	-0.18542	0.15938		14.25	3.32578	41.5699
1.45	-0.21747	-0.0238		14.5	1.58998	19.6072
1.475	-0.25867	-0.25932		14.75	0.29392	3.20837
1.5	-0.31296	-0.56969		15	-0.98688	-12.9974
1.525	-0.34101	-0.73003		15.25	-1.85103	-23.9313
1.55	-0.37126	-0.90295		15.5	-2.76147	-35.4509
1.575	-0.39487	-1.03794		15.75	-3.30806	-42.3668
1.6	-0.40491	-1.09532		16	-3.71041	-47.4577
1.625	-0.40767	-1.11112		16.25	-3.56826	-45.6591
1.65	-0.40771	-1.11131		16.5	-3.11405	-39.9121
1.675	-0.40489	-1.09522		16.75	-2.76944	-35.5517
1.7	-0.38847	-1.00132		17	-2.32626	-29.9442
1.725	-0.36478	-0.86592		17.25	-2.02039	-26.0742
1.75	-0.32283	-0.62611		17.5	-1.67539	-21.7089
1.775	-0.29233	-0.45174		17.75	-1.34776	-17.5635
1.8	-0.30225	-0.50844		18	-1.03787	-13.6425
1.825	-0.30739	-0.53783		18.25	-0.9444	-12.4599
1.85	-0.27562	-0.35625		18.5	-0.63534	-8.54938
1.875	-0.31564	-0.58501		18.75	-0.40159	-5.59181
1.9	-0.29059	-0.44178		19	-0.49106	-6.72384
1.925	-0.27522	-0.35393		19.25	-0.3971	-5.53497
1.95	-0.27996	-0.38102		19.5	-0.46541	-6.39927
1.975	-0.26176	-0.27699		19.75	-0.18855	-2.89625
2	-0.22675	-0.07684		20	-0.23797	-3.52154
2.025	-0.19639	0.09668		20.25	-0.09403	-1.70026
2.05	-0.16457	0.27857		20.5	-0.17302	-2.69973
2.075	-0.15832	0.31432		20.75	-0.11756	-1.998
2.1	-0.15498	0.3334		21	-0.21661	-3.2513
2.125	-0.14476	0.39184		21.25	-0.12266	-2.06257
2.15	-0.12599	0.49913		21.5	-0.12767	-2.126
2.175	-0.12691	0.49386		21.75	-0.14917	-2.39801
2.2	-0.09845	0.65653		22	-0.05279	-1.1785
2.225	-0.05913	0.88132		22.25	0.04346	0.03936
2.25	-0.03633	1.01168		22.5	-0.10161	-1.79625
2.275	0.01149	1.28505		22.75	0.0324	-0.10056
2.3	0.06036	1.56442		23	2.39009	29.7308
2.325	0.09435	1.75867		23.25	5.26416	66.0958
2.35	0.1277	1.94936		23.5	7.06659	88.9016
2.375	0.16041	2.13635		23.75	8.53174	107.44
2.4	0.18923	2.30109		24	10.2532	129.222
2.425	0.21774	2.46403		24.25	11.009	138.785
2.45	0.24652	2.62855		24.5	8.44197	106.304
2.475	0.27036	2.76484		24.75	5.47978	68.824
2.5	0.29155	2.88597		25	2.7437	34.2049
2.525	0.30852	2.983		25.25	0.43813	5.03295
2.55	0.32828	3.09596		25.5	-1.78126	-23.0485
2.575	0.35786	3.26503		25.75	-3.46058	-44.2966
2.6	0.37972	3.39001		26	-4.59635	-58.6672
2.625	0.39449	3.47447		26.25	-5.25115	-66.9524
2.65	0.42594	3.6542		26.5	-5.65201	-72.0244
2.675	0.4504	3.79407		26.75	-5.60135	-71.3833
2.7	0.48669	4.0015		27	-5.30252	-67.6023
2.725	0.56046	4.42321		27.25	-4.63662	-59.1768
2.75	0.62042	4.76597		27.5	-3.90074	-49.8658
2.775	0.62222	4.77624		27.75	-3.27624	-41.9642
2.8	0.64186	4.88852		28	-2.71601	-34.8757
2.825	0.68845	5.15486		28.25	-2.33896	-30.1049
2.85	0.65497	4.96348		28.5	-1.95427	-25.2376
2.875	0.67585	5.08282		28.75	-1.72923	-22.3902
2.9	0.69729	5.2054		29	-1.37168	-17.8661
2.925	0.67364	5.07021		29.25	-1.11957	-14.6762
2.95	0.65993	4.99182		29.5	-0.92116	-12.1659
2.975	0.70241	5.23469		29.75	-0.74183	-9.89678
3	0.73705	5.43267		30	-0.58485	-7.91054
3.025	0.7763	5.65703		30.25	-0.58943	-7.96853
3.05	0.82077	5.91124		30.5	-0.35057	-4.94632
3.075	0.84383	6.04306		30.75	-0.39375	-5.49259
3.1	0.86442	6.16079		31	-0.23991	-3.54615
3.125	0.88565	6.28217		31.25	-0.17865	-2.77102
3.15	0.89724	6.34841		31.5	-0.21299	-3.20544
3.175	0.90147	6.3726		31.75	-0.09231	-1.67859
3.2	0.91173	6.43125		32	-0.1249	-2.09086
3.225	0.91686	6.46056		32.25	-0.07843	-1.50288
3.25	0.93665	6.57367		32.5	-0.07236	-1.42613
3.275	0.95542	6.68099		32.75	-0.03213	-0.91711
3.3	0.98009	6.82203		33	0.01786	-0.28464
3.325	1.02542	7.08114		33.25	-0.07055	-1.40325
3.35	1.05292	7.23834		33.5	0.06939	0.36746
3.375	1.08152	7.40186		33.75	-0.14236	-2.31181
3.4	1.11711	7.6053		34	-0.06859	-1.37838
3.425	1.13974	7.73464		34.25	-0.00852	-0.61842
3.45	1.1453	7.76641		34.5	-0.12272	-2.06333
3.475	1.15923	7.84605		34.75	-0.09126	-1.6653
3.5	1.15676	7.83197		35	-0.15804	-2.51025
3.525	1.15085	7.79818		35.25	-0.06927	-1.38705
3.55	1.16293	7.86723		35.5	-0.14269	-2.31603
3.575	1.16833	7.89807		35.75	-0.05136	-1.16036
3.6	1.17842	7.95575		36	-0.01762	-0.73356
3.625	1.19838	8.06988		36.25	-0.05146	-1.16166
3.65	1.2143	8.16086		36.5	-0.09522	-1.71536
3.675	1.23548	8.28194		36.75	0.07653	0.45772
3.7	1.29137	8.60142		37	0.03042	-0.12568
3.725	1.32871	8.81492		37.25	-0.02942	-0.88287
3.75	1.32643	8.80185		37.5	-0.0042	-0.56372
3.775	1.32299	8.78221		37.75	-0.04579	-1.0899
3.8	1.36778	9.03821		38	-0.01659	-0.72047
3.825	1.33668	8.86045		38.25	-0.09057	-1.6565
3.85	1.35281	8.95265		38.5	-0.15884	-2.52033
3.875	1.3773	9.09268		38.75	-0.1539	-2.45779
3.9	1.35351	8.95666		39	-0.06109	-1.28352
3.925	1.32768	8.80903		39.25	0.07212	0.4019
3.95	1.34206	8.89122		39.5	-0.17871	-2.77175
3.975	1.34958	8.93418		39.75	-0.1364	-2.23645
4	1.34934	8.93284		40	-0.07203	-1.42198
4.025	1.35728	8.9782		40.25	-0.06724	-1.36134
4.05	1.34592	8.91328		40.5	-0.05387	-1.19222
4.075	1.34564	8.91168		40.75	-0.00323	-0.55141
4.1	1.31969	8.76334		41	-0.02879	-0.87479
4.125	1.30597	8.68492		41.25	0.02289	-0.22089
4.15	1.30994	8.70759		41.5	0.03121	-0.11571
4.175	1.29745	8.63622		41.75	0.04316	0.03557
4.2	1.27837	8.52714		42	0.2275	2.36793
4.225	1.26727	8.46368		42.25	1.49528	18.409
4.25	1.26011	8.42274		42.5	4.26141	53.4083
4.275	1.25539	8.39577		42.75	7.97664	100.416
4.3	1.25101	8.37075		43	9.25707	116.617
4.325	1.24073	8.31194		43.25	11.443	144.276
4.35	1.23515	8.28005		43.5	12.7517	160.834
4.375	1.21456	8.16236		43.75	10.443	131.623
4.4	1.19236	8.03542		44	7.24919	91.2121
4.425	1.19124	8.02903		44.25	4.17008	52.2527
4.45	1.18416	7.98858		44.5	1.18114	14.4342
4.475	1.15719	7.83437		44.75	-1.29156	-16.8525
4.5	1.13891	7.72992		45	-3.226	-41.3286
4.525	1.1362	7.7144		45.25	-4.66411	-59.5246
4.55	1.12359	7.64233		45.5	-5.72311	-72.9239
4.575	1.10234	7.52082		45.75	-6.31848	-80.4571
4.6	1.09441	7.47554		46	-6.24285	-79.5002
4.625	1.08083	7.39792		46.25	-5.97365	-76.094
4.65	1.07022	7.33721		46.5	-5.29855	-67.552
4.675	1.08511	7.42235		46.75	-4.62586	-59.0407
4.7	1.10079	7.51199		47	-3.94993	-50.4882
4.725	1.06707	7.31924		47.25	-3.31984	-42.5158
4.75	1.04326	7.18315		47.5	-2.69715	-34.6371
4.775	1.0514	7.22963		47.75	-2.26573	-29.1784
4.8	0.98942	6.87535		48	-1.96949	-25.4301
4.825	0.96684	6.74627		48.25	-1.54238	-20.0261
4.85	0.94214	6.60506		48.5	-1.20723	-15.7854
4.875	0.88649	6.28695		48.75	-1.13111	-14.8223
4.9	0.84348	6.04106		49	-0.85432	-11.3202
4.925	0.82687	5.94612		49.25	-0.75138	-10.0177
4.95	0.81745	5.89226		49.5	-0.61978	-8.35257
4.975	0.8093	5.84567		49.75	-0.51138	-6.98095
5	0.78841	5.72628		50	-0.48721	-6.67516
5.025	0.76935	5.6173		50.25	-0.25014	-3.67555
5.05	0.7613	5.57129		50.5	-0.2372	-3.51176
5.075	0.74743	5.49204		50.75	-0.14114	-2.29636
5.1	0.72865	5.38465		51	-0.14873	-2.39247
5.125	0.70708	5.26135		51.25	-0.06538	-1.3378
5.15	0.67905	5.1011		51.5	-0.12235	-2.05861
5.175	0.65055	4.93818		51.75	-0.05572	-1.2156
5.2	0.62143	4.77173		52	-0.07319	-1.43663
5.225	0.59409	4.61543		52.25	-0.10637	-1.8565
5.25	0.58307	4.55245		52.5	-0.02443	-0.81962
5.275	0.54858	4.35531		52.75	-0.03313	-0.9297
5.3	0.53276	4.26483		53	0.00192	-0.48631
5.325	0.52724	4.23328		53.25	0.08707	0.59105
5.35	0.52443	4.21723		53.5	-0.01133	-0.65398
5.375	0.51977	4.1906		53.75	-0.08148	-1.54146
5.4	0.52638	4.22837		54	-0.22791	-3.39431
5.425	0.50608	4.11235		54.25	-0.08529	-1.58978
5.45	0.48612	3.99824		54.5	0.00929	-0.39303
5.475	0.46981	3.905		54.75	-0.09168	-1.67054
5.5	0.44814	3.78112		55	-0.20382	-3.08952
5.525	0.40378	3.52754		55.25	-0.26433	-3.85506
5.55	0.37711	3.37506		55.5	-0.06013	-1.2714
5.575	0.33863	3.15511		55.75	-0.11143	-1.92041
5.6	0.29192	2.88808		56	-0.20447	-3.09772
5.625	0.2584	2.69651		56.25	-0.0347	-0.94955
5.65	0.26566	2.73798		56.5	-0.02027	-0.76701
5.675	0.2447	2.6182		56.75	0.00275	-0.47573
5.7	0.1915	2.31407		57	-0.01736	-0.73023
5.725	0.14675	2.05827		57.25	-0.01737	-0.73033
5.75	0.14071	2.02371		57.5	0.03027	-0.12751
5.775	0.08074	1.68091		57.75	-0.08044	-1.52839
5.8	0.05919	1.55771		58	-0.01321	-0.67766
5.825	0.04191	1.45892		58.25	0.23763	2.49613
5.85	0.00131	1.22686		58.5	0.08578	0.57475
5.875	-0.0364	1.01125		58.75	0.04128	0.01169
5.9	-0.05283	0.91733		59	0.17127	1.65647
5.925	-0.05067	0.92972		59.25	0.05746	0.21646
5.95	-0.05779	0.88899		59.5	0.16546	1.58293
5.975	-0.08135	0.7543		59.75	0.17821	1.74426
6	-0.09425	0.68058		60	0.11179	0.90391
6.025	-0.11902	0.53899		60.25	-0.00443	-0.56662
6.05	-0.13732	0.43438		60.5	0.03733	-0.03825
6.075	-0.14889	0.36824		60.75	0.00479	-0.44991
6.1	-0.16582	0.27142		61	-0.11292	-1.93937
6.125	-0.17103	0.24166		61.25	-0.23109	-3.43453
6.15	-0.16858	0.25568		61.5	-0.11293	-1.93942
6.175	-0.17111	0.24118		61.75	-0.15287	-2.4448
6.2	-0.17649	0.21046		62	-0.07586	-1.47041
6.225	-0.19562	0.10108		62.25	0.00343	-0.46716
6.25	-0.20654	0.03864		62.5	0.0239	-0.2082
6.275	-0.21733	-0.02299		62.75	0.01666	-0.29976
6.3	-0.22697	-0.07814		63	-0.08757	-1.61862
6.325	-0.24936	-0.2061		63.25	-0.03719	-0.98118
6.35	-0.26804	-0.3129		63.5	0.00765	-0.41371
6.375	-0.27987	-0.38051		63.75	-0.05335	-1.18564
6.4	-0.28856	-0.43018		64	0.06651	0.33098
6.425	-0.28398	-0.40401		64.25	-0.07356	-1.44131
6.45	-0.27612	-0.35909		64.5	-0.00165	-0.53149
6.475	-0.2677	-0.31095		64.75	-0.03264	-0.92351
6.5	-0.25796	-0.25526		65	-0.16282	-2.57068
6.525	-0.25046	-0.2124		65.25	-0.06089	-1.28101
6.55	-0.23778	-0.13989		65.5	-0.0523	-1.17229
6.575	-0.22477	-0.06555		65.75	0.03428	-0.07685
6.6	-0.20288	0.0596		66	-0.04731	-1.10917
6.625	-0.1877	0.14636		66.25	-0.10665	-1.86002
6.65	-0.17309	0.22989		66.5	0.08155	0.52126
6.675	-0.19426	0.10889		66.75	-0.03366	-0.93648
6.7	-0.22382	-0.06011		67	0.00568	-0.43872
6.725	-0.21544	-0.01223		67.25	-0.12263	-2.06217
6.75	-0.26537	-0.29765		67.5	-0.05259	-1.17593
6.775	-0.27481	-0.35161		67.75	-0.07713	-1.48642
6.8	-0.27844	-0.37232		68	0.0181	-0.28161
6.825	-0.3135	-0.57275		68.25	-0.00802	-0.61204
6.85	-0.33137	-0.67495		68.5	-0.01003	-0.63743
6.875	-0.31462	-0.57919		68.75	0.0017	-0.48902
6.9	-0.30292	-0.51231		69	-0.02031	-0.76756
6.925	-0.29408	-0.46177		69.25	-0.04793	-1.11702
6.95	-0.29984	-0.4947		69.5	-0.09413	-1.70161
6.975	-0.31256	-0.56737		69.75	0.00322	-0.46979
7	-0.32505	-0.63878		70	0.07798	0.47613
7.025	-0.3349	-0.69509		70.25	0.0495	0.11578
7.05	-0.34616	-0.75948		70.5	-0.03003	-0.89054
7.075	-0.35893	-0.83246		70.75	0.08684	0.58815
7.1	-0.37016	-0.89664		71	-0.02904	-0.87801
7.125	-0.37714	-0.93659		71.25	0.04742	0.08949
7.15	-0.38697	-0.99276		71.5	-0.06924	-1.38666
7.175	-0.3948	-1.03751		71.75	0.000372742	-0.50585
7.2	-0.40359	-1.08777		72	-0.00329	-0.5522
7.225	-0.4046	-1.09356		72.25	0.08082	0.51201
7.25	-0.40781	-1.11191		72.5	0.06523	0.31474
7.275	-0.40436	-1.09217		72.75	0.08847	0.60889
7.3	-0.40398	-1.09001		73	0.18368	1.81349
7.325	-0.40435	-1.09212		73.25	0.06792	0.34882
7.35	-0.40576	-1.10018		73.5	0.0796	0.49655
7.375	-0.41989	-1.18096		73.75	0.04581	0.06908
7.4	-0.43284	-1.25495		74	-0.06856	-1.37808
7.425	-0.44408	-1.3192		74.25	0.02468	-0.19832
7.45	-0.45116	-1.35969		74.5	0.18273	1.80147
7.475	-0.46668	-1.44844		74.75	0.00915	-0.39481
7.5	-0.46556	-1.442		75	0.00684	-0.42407
7.525	-0.45746	-1.39573		75.25	0.02708	-0.16793
7.55	-0.45234	-1.36644		75.5	-0.06943	-1.38909
7.575	-0.44041	-1.29823		75.75	-0.04105	-1.03
7.6	-0.40479	-1.09462		76	-0.0766	-1.4798
7.625	-0.3793	-0.94889		76.25	-0.05352	-1.18776
7.65	-0.4042	-1.09126		76.5	0.04908	0.11039
7.675	-0.42124	-1.18867		76.75	-0.05455	-1.20078
7.7	-0.39697	-1.04993		77	-0.01393	-0.68687
7.725	-0.46659	-1.4479		77.25	-0.09563	-1.72055
7.75	-0.48249	-1.53877		77.5	-0.06262	-1.30291
7.775	-0.48612	-1.55956		77.75	0.01217	-0.3566
7.8	-0.52402	-1.77623		78	-0.016	-0.71299
7.825	-0.55041	-1.92704		78.25	-0.09568	-1.72121
7.85	-0.53379	-1.83203		78.5	0.07018	0.37743
7.875	-0.50885	-1.68951		78.75	0.013	-0.34613
7.9	-0.49569	-1.61423		79	-0.0532	-1.18364
7.925	-0.48203	-1.53618		79.25	0.02887	-0.14525
7.95	-0.47211	-1.47947		79.5	0.01939	-0.26527
7.975	-0.48069	-1.52852		79.75	-0.02303	-0.80195
8	-0.48924	-1.57738		80	0.10023	0.75759
8.025	-0.49609	-1.61654		80.25	-0.02495	-0.82629
8.05	-0.51347	-1.71591		80.5	0.05648	0.20407
8.075	-0.51741	-1.73843		80.75	0.07367	0.42155
8.1	-0.51993	-1.75283		81	0.02889	-0.14496
8.125	-0.53787	-1.8554		81.25	0.06067	0.25702
8.15	-0.54654	-1.90493		81.5	0.000975051	-0.49823
8.175	-0.54571	-1.9002		81.75	0.04113	0.00985
8.2	-0.55417	-1.94858		82	-0.04476	-1.07688
8.225	-0.57017	-2.04003		82.25	0.18001	1.76713
8.25	-0.57478	-2.06638		82.5	2.23694	27.793
8.275	-0.5962	-2.18881		82.75	5.4573	68.5396
8.3	-0.62337	-2.34414		83	6.39002	80.3411
8.325	-0.63368	-2.40305		83.25	6.85675	86.2465
8.35	-0.62818	-2.37164		83.5	7.01022	88.1883
8.375	-0.64232	-2.45246		83.75	5.87802	73.8629
8.4	-0.64478	-2.46652		84	3.91729	49.0542
8.425	-0.64692	-2.47877		84.25	2.17757	27.0418
8.45	-0.65128	-2.50368		84.5	0.46574	5.38239
8.475	-0.65587	-2.52993		84.75	-1.01672	-13.3749
8.5	-0.64496	-2.46757		85	-2.14149	-27.6064
8.525	-0.64967	-2.4945		85.25	-3.01092	-38.6072
8.55	-0.6515	-2.50495		85.5	-3.41868	-43.7664
8.575	-0.61494	-2.29595		85.75	-3.79896	-48.578
8.6	-0.58801	-2.14199		86	-3.66974	-46.9431
8.625	-0.60043	-2.213		86.25	-3.47524	-44.4821
8.65	-0.60544	-2.24164		86.5	-3.16954	-40.6142
8.675	-0.58138	-2.10407		86.75	-2.56799	-33.0029
8.7	-0.61877	-2.31786		87	-2.18574	-28.1663
8.725	-0.60311	-2.22832		87.25	-1.7879	-23.1325
8.75	-0.59294	-2.1702		87.5	-1.53466	-19.9284
8.775	-0.60865	-2.26001		87.75	-1.2945	-16.8896
8.8	-0.62341	-2.34433		88	-0.99055	-13.0439
8.825	-0.62377	-2.34641		88.25	-0.85938	-11.3841
8.85	-0.60265	-2.22566		88.5	-0.73251	-9.77888
8.875	-0.58986	-2.15258		88.75	-0.5901	-7.97697
8.9	-0.5816	-2.10533		89	-0.53097	-7.22882
8.925	-0.58314	-2.11418		89.25	-0.45935	-6.32259
8.95	-0.58696	-2.13599		89.5	-0.31336	-4.47545
8.975	-0.5899	-2.15282		89.75	-0.16669	-2.61971
9	-0.59779	-2.19793		90	-0.26962	-3.92203
9.025	-0.59996	-2.21033		90.25	-0.28639	-4.13426
9.05	-0.60013	-2.21128		90.5	-0.16073	-2.5443
9.075	-0.60211	-2.22261		90.75	-0.14778	-2.38038
9.1	-0.62193	-2.33589		91	-0.21837	-3.27359
9.125	-0.62375	-2.34633		91.25	-0.02029	-0.76735
9.15	-0.62174	-2.33482		91.5	-0.14154	-2.30142
9.175	-0.61665	-2.30574		91.75	0.08547	0.57088
9.2	-0.61891	-2.31866		92	-0.15818	-2.51197
9.225	-0.62182	-2.3353		92.25	-0.0475	-1.11158
9.25	-0.62215	-2.33714		92.5	-0.00509	-0.57499
9.275	-0.60905	-2.2623		92.75	0.11062	0.88903
9.3	-0.58824	-2.14332		93	-0.0423	-1.04576
9.325	-0.54949	-1.9218		93.25	0.00913	-0.3951
9.35	-0.52328	-1.77195		93.5	0.05824	0.22638
9.375	-0.50928	-1.69196		93.75	0.09141	0.64602
9.4	-0.48703	-1.56478		94	-0.02101	-0.7764
9.425	-0.46381	-1.43199		94.25	0.15023	1.39028
9.45	-0.45246	-1.36713		94.5	0.09525	0.69457
9.475	-0.44458	-1.32209		94.75	-0.02061	-0.7714
9.5	-0.44978	-1.35183		95	-0.03374	-0.93751
9.525	-0.45228	-1.36609		95.25	-0.14948	-2.40184
9.55	-0.42929	-1.23468		95.5	-0.10229	-1.80487
9.575	-0.40335	-1.08637		95.75	-0.07286	-1.43239
9.6	-0.42386	-1.20361		96	-0.1551	-2.47296
9.625	-0.42346	-1.20137		96.25	-0.274	-3.97743
9.65	-0.38546	-0.98411		96.5	-0.09669	-1.73399
9.675	-0.43408	-1.26207		96.75	-0.10817	-1.87919
9.7	-0.42396	-1.20422		97	-0.14277	-2.31706
9.725	-0.41404	-1.14748		97.25	-0.17509	-2.72598
9.75	-0.44445	-1.32134		97.5	-0.04985	-1.14128
9.775	-0.46292	-1.42691		97.75	-0.07059	-1.40367
9.8	-0.4382	-1.28559		98	-0.1043	-1.8303
9.825	-0.43559	-1.27067		98.25	-0.02373	-0.81083
9.85	-0.43305	-1.25618		98.5	-0.02724	-0.85525
9.875	-0.42463	-1.20804		98.75	0.0186	-0.27521
9.9	-0.42825	-1.22872		99	-0.0289	-0.87627
9.925	-0.43663	-1.27661		99.25	-0.01712	-0.72713
9.95	-0.42831	-1.2291		99.5	0.0506	0.12961
9.975	-0.42453	-1.20746
10	-0.43513	-1.26808
10.025	-0.42574	-1.21441
10.05	-0.41854	-1.17321
10.075	-0.41926	-1.17733
10.1	-0.43216	-1.25108
10.125	-0.43518	-1.26836
10.15	-0.43645	-1.27563
10.175	-0.45374	-1.37442
10.2	-0.45059	-1.35641
10.225	-0.43562	-1.27087
10.25	-0.43904	-1.29043
10.275	-0.43644	-1.27554
10.3	-0.43796	-1.28427
10.325	-0.43611	-1.27368
10.35	-0.42791	-1.22681
10.375	-0.41263	-1.13947
10.4	-0.40157	-1.07623
10.425	-0.39939	-1.06376
10.45	-0.37584	-0.92915
10.475	-0.34656	-0.76176
10.5	-0.31048	-0.55553
10.525	-0.25329	-0.22859
10.55	-0.22614	-0.07339
10.575	-0.25684	-0.24886
10.6	-0.27686	-0.36329
10.625	-0.25104	-0.2157
10.65	-0.3036	-0.51617
10.675	-0.30689	-0.535
10.7	-0.31275	-0.56849
10.725	-0.34918	-0.77672
10.75	-0.35174	-0.79136
10.775	-0.34019	-0.72534
10.8	-0.32773	-0.6541
10.825	-0.31282	-0.56891
10.85	-0.32393	-0.6324
10.875	-0.34534	-0.75479
10.9	-0.34925	-0.77713
10.925	-0.35266	-0.79665
10.95	-0.36709	-0.87909
10.975	-0.37425	-0.92004
11	-0.36359	-0.85912
11.025	-0.3757	-0.92834
11.05	-0.37033	-0.89766
11.075	-0.36312	-0.8564
11.1	-0.3526	-0.79631
11.125	-0.34599	-0.7585
11.15	-0.34769	-0.76823
11.175	-0.34457	-0.75037
11.2	-0.33838	-0.71501
11.225	-0.33362	-0.68776
11.25	-0.3353	-0.69741
11.275	-0.31809	-0.59899
11.3	-0.31283	-0.56891
11.325	-0.31024	-0.55412
11.35	-0.30522	-0.52541
11.375	-0.30582	-0.52889
11.4	-0.29998	-0.49548
11.425	-0.29855	-0.48733
11.45	-0.28457	-0.4074
11.475	-0.28676	-0.41989
11.5	-0.25494	-0.23799
11.525	-0.24243	-0.16648
11.55	-0.27309	-0.34176
11.575	-0.2805	-0.38413
11.6	-0.25283	-0.22594
11.625	-0.30833	-0.54321
11.65	-0.31214	-0.56497
11.675	-0.30824	-0.54269
11.7	-0.32842	-0.65805
11.725	-0.34666	-0.76234
11.75	-0.34885	-0.77487
11.775	-0.3373	-0.70884
11.8	-0.33872	-0.71695
11.825	-0.34762	-0.7678
11.85	-0.35943	-0.83535
11.875	-0.3625	-0.85289
11.9	-0.36963	-0.89361
11.925	-0.37634	-0.93199
11.95	-0.36689	-0.87799
11.975	-0.35174	-0.79138
12	-0.32862	-0.65922
12.025	-0.30827	-0.54286
12.05	-0.29262	-0.4534
12.075	-0.27963	-0.37916
12.1	-0.26913	-0.31913
12.125	-0.26001	-0.267
12.15	-0.25771	-0.25383
12.175	-0.25447	-0.23535
12.2	-0.24942	-0.20646
12.225	-0.26334	-0.28601
12.25	-0.26083	-0.27167
12.275	-0.25333	-0.22882
12.3	-0.25446	-0.23524
12.325	-0.25095	-0.21518
12.35	-0.23826	-0.14267
12.375	-0.23955	-0.15001
12.4	-0.23259	-0.11028
12.425	-0.21911	-0.03322
12.45	-0.20901	0.02456
12.475	-0.1726	0.23271
12.5	-0.13407	0.45291
12.525	-0.14903	0.36739
12.55	-0.15376	0.3404
12.575	-0.12448	0.50774
12.6	-0.17252	0.23314
12.625	-0.17311	0.22974
12.65	-0.1623	0.29158
12.675	-0.17835	0.19984
12.7	-0.19327	0.1145
12.725	-0.16378	0.2831
12.75	-0.12803	0.48747
12.775	-0.10193	0.63667
12.8	-0.07723	0.77784
12.825	-0.04235	0.97723
12.85	-0.02862	1.05574
12.875	-0.00808	1.17317
12.9	0.00589	1.253
12.925	0.01061	1.28
12.95	0.03813	1.43733
12.975	0.0653	1.59266
13	0.09188	1.74455
13.025	0.13202	1.97403
13.05	0.17012	2.19183
13.075	0.20545	2.39379
13.1	0.23224	2.54696
13.125	0.25924	2.70129
13.15	0.2776	2.80626
13.175	0.29809	2.92336
13.2	0.30146	2.94264
13.225	0.29848	2.92561
13.25	0.30242	2.94813
13.275	0.29986	2.93349
13.3	0.30303	2.95159
13.325	0.31288	3.00793
13.35	0.32518	3.07821
13.375	0.33831	3.15327
13.4	0.35095	3.22554
13.425	0.37697	3.37428
13.45	0.44459	3.76083
13.475	0.49859	4.06953
13.5	0.51261	4.14968
13.525	0.52429	4.21641
13.55	0.57673	4.51624
13.575	0.55837	4.41125
13.6	0.57427	4.50217
13.625	0.58967	4.59017
13.65	0.57919	4.53027
13.675	0.56492	4.44869
13.7	0.5778	4.52232
13.725	0.59229	4.60515
13.75	0.60976	4.70503
13.775	0.61817	4.75309
13.8	0.62224	4.77636
13.825	0.62688	4.80289
13.85	0.64031	4.87965
13.875	0.64822	4.92487
13.9	0.65942	4.9889
13.925	0.67893	5.10045
13.95	0.69844	5.21196
13.975	0.709	5.27233
14	0.7141	5.30149
14.025	0.73328	5.41111
14.05	0.7416	5.45867
14.075	0.72981	5.3913
14.1	0.72849	5.38375
14.125	0.74438	5.47461
14.15	0.7419	5.46038
14.175	0.74439	5.47465
14.2	0.76546	5.59506
14.225	0.77323	5.63951
14.25	0.76567	5.59626
14.275	0.77665	5.65904
14.3	0.77618	5.65636
14.325	0.77814	5.66756
14.35	0.78206	5.68998
14.375	0.77209	5.63298
14.4	0.77068	5.62493
14.425	0.79245	5.74939
14.45	0.79233	5.74868
14.475	0.75929	5.55984
14.5	0.73445	5.41783
14.525	0.73732	5.43424
14.55	0.67314	5.06732
14.575	0.65051	4.93797
14.6	0.63365	4.84162
14.625	0.6057	4.6818
14.65	0.57617	4.513
14.675	0.57265	4.49288
14.7	0.57297	4.49474
14.725	0.56282	4.43671
14.75	0.55122	4.37038
14.775	0.53372	4.27037
14.8	0.52687	4.23121
14.825	0.51856	4.18368
14.85	0.51493	4.16295
14.875	0.52076	4.19626
14.9	0.52482	4.21945
14.925	0.52946	4.24602
14.95	0.5395	4.30338
14.975	0.52944	4.24588
15	0.52292	4.20861
15.025	0.5142	4.15877
15.05	0.48958	4.01801
15.075	0.47416	3.92986
15.1	0.45843	3.83993
15.125	0.43665	3.71545
15.15	0.42374	3.64162
15.175	0.41149	3.57164
15.2	0.38596	3.4257
15.225	0.37058	3.33774
15.25	0.35603	3.25461
15.275	0.33701	3.14587
15.3	0.31991	3.04811
15.325	0.32268	3.06397
15.35	0.31523	3.02135
15.375	0.32595	3.08265
15.4	0.34751	3.20586
15.425	0.35796	3.2656
15.45	0.33585	3.13925
15.475	0.31246	3.0055
15.5	0.32697	3.08846
15.525	0.25752	2.69148
15.55	0.24096	2.59679
15.575	0.22332	2.49594
15.6	0.17363	2.21193
15.625	0.15328	2.09558
15.65	0.16313	2.15185
15.675	0.17118	2.19789
15.7	0.18344	2.26796
15.725	0.17569	2.22367
15.75	0.15935	2.13028
15.775	0.15029	2.07849
15.8	0.12347	1.92516
15.825	0.10219	1.80353
15.85	0.07905	1.67121
15.875	0.05465	1.53177
15.9	0.03054	1.39391
15.925	0.01183	1.28699
15.95	-0.000300483	1.21763
15.975	-0.01541	1.13127
16	-0.02831	1.0575
16.025	-0.04177	0.98058
16.05	-0.06252	0.86196
16.075	-0.07287	0.80279
16.1	-0.07906	0.76743
16.125	-0.09141	0.69678
16.15	-0.09737	0.66276
16.175	-0.09906	0.65309
16.2	-0.11178	0.58037
16.225	-0.11811	0.54419
16.25	-0.12627	0.49752
16.275	-0.12545	0.50222
16.3	-0.14119	0.41223
16.325	-0.13523	0.44633
16.35	-0.12818	0.48662
16.375	-0.09886	0.65424
16.4	-0.09271	0.68938
16.425	-0.11799	0.54484
16.45	-0.14362	0.39836
16.475	-0.13915	0.42389
16.5	-0.20249	0.06179
16.525	-0.20788	0.03099
16.55	-0.22454	-0.06421
16.575	-0.26894	-0.31802
16.6	-0.28835	-0.42899
16.625	-0.27919	-0.37664
16.65	-0.27416	-0.3479
16.675	-0.2648	-0.2944
16.7	-0.26017	-0.26789
16.725	-0.26567	-0.29932
16.75	-0.28283	-0.39742
16.775	-0.28518	-0.41088
16.8	-0.29425	-0.46273
16.825	-0.31732	-0.59458
16.85	-0.32113	-0.61639
16.875	-0.31926	-0.60571
16.9	-0.33498	-0.69556
16.925	-0.34389	-0.74651
16.95	-0.35465	-0.80798
16.975	-0.36133	-0.8462
17	-0.37884	-0.94629
17.025	-0.38299	-0.97003
17.05	-0.38414	-0.97656
17.075	-0.39689	-1.04946
17.1	-0.40927	-1.12024
17.125	-0.41014	-1.12523
17.15	-0.41574	-1.15721
17.175	-0.42084	-1.18637
17.2	-0.421	-1.18727
17.225	-0.41743	-1.16691
17.25	-0.42132	-1.18914
17.275	-0.4146	-1.15071
17.3	-0.41149	-1.13292
17.325	-0.40843	-1.11546
17.35	-0.3753	-0.92606
17.375	-0.3525	-0.79571
17.4	-0.37331	-0.91467
17.425	-0.38325	-0.9715
17.45	-0.3644	-0.86375
17.475	-0.41397	-1.14708
17.5	-0.43039	-1.24094
17.525	-0.43212	-1.25088
17.55	-0.45713	-1.39383
17.575	-0.4804	-1.52687
17.6	-0.48447	-1.55012
17.625	-0.46571	-1.4429
17.65	-0.454	-1.37592
17.675	-0.44774	-1.34013
17.7	-0.43577	-1.27173
17.725	-0.43237	-1.25227
17.75	-0.43075	-1.24303
17.775	-0.45057	-1.35631
17.8	-0.45725	-1.39451
17.825	-0.46156	-1.41917
17.85	-0.4625	-1.42454
17.875	-0.45927	-1.40606
17.9	-0.4665	-1.44739
17.925	-0.45237	-1.36661
17.95	-0.43614	-1.27383
17.975	-0.42478	-1.20891
18	-0.40287	-1.08365
18.025	-0.39602	-1.0445
18.05	-0.40175	-1.07726
18.075	-0.40536	-1.0979
18.1	-0.41256	-1.13902
18.125	-0.41473	-1.15146
18.15	-0.42249	-1.19583
18.175	-0.44306	-1.31341
18.2	-0.43862	-1.28803
18.225	-0.44361	-1.31655
18.25	-0.45183	-1.36354
18.275	-0.4432	-1.3142
18.3	-0.43309	-1.25639
18.325	-0.41283	-1.14059
18.35	-0.38812	-0.99932
18.375	-0.40887	-1.11796
18.4	-0.42881	-1.23194
18.425	-0.41459	-1.15063
18.45	-0.47107	-1.47351
18.475	-0.46907	-1.46206
18.5	-0.47048	-1.47013
18.525	-0.49896	-1.63297
18.55	-0.51142	-1.7042
18.575	-0.50374	-1.66027
18.6	-0.48056	-1.52776
18.625	-0.46107	-1.41634
18.65	-0.45711	-1.39374
18.675	-0.44899	-1.34728
18.7	-0.45055	-1.35624
18.725	-0.46173	-1.42012
18.75	-0.463	-1.42738
18.775	-0.46076	-1.41458
18.8	-0.47153	-1.47617
18.825	-0.47009	-1.46789
18.85	-0.47352	-1.48752
18.875	-0.47139	-1.47534
18.9	-0.46812	-1.45668
18.925	-0.45527	-1.38322
18.95	-0.44715	-1.33677
18.975	-0.43545	-1.26988
19	-0.43133	-1.24633
19.025	-0.41813	-1.1709
19.05	-0.40698	-1.10716
19.075	-0.41573	-1.15716
19.1	-0.41748	-1.16715
19.125	-0.43132	-1.24629
19.15	-0.44141	-1.30397
19.175	-0.44609	-1.33072
19.2	-0.44249	-1.31016
19.225	-0.44826	-1.34311
19.25	-0.44034	-1.29787
19.275	-0.41519	-1.15405
19.3	-0.37844	-0.94402
19.325	-0.34815	-0.77082
19.35	-0.35474	-0.80851
19.375	-0.3776	-0.93919
19.4	-0.35971	-0.83692
19.425	-0.40544	-1.09836
19.45	-0.40368	-1.08826
19.475	-0.39325	-1.02867
19.5	-0.42013	-1.18232
19.525	-0.44765	-1.33962
19.55	-0.43755	-1.28192
19.575	-0.41673	-1.16287
19.6	-0.40389	-1.0895
19.625	-0.39288	-1.02655
19.65	-0.40305	-1.08468
19.675	-0.40244	-1.0812
19.7	-0.40985	-1.12357
19.725	-0.40557	-1.0991
19.75	-0.39939	-1.06374
19.775	-0.40157	-1.07622
19.8	-0.40874	-1.11719
19.825	-0.41578	-1.15746
19.85	-0.41123	-1.13145
19.875	-0.40651	-1.10444
19.9	-0.40881	-1.11761
19.925	-0.40336	-1.08644
19.95	-0.40218	-1.0797
19.975	-0.39595	-1.0441
20	-0.38225	-0.96576
20.025	-0.37506	-0.92466
20.05	-0.3789	-0.94663
20.075	-0.37538	-0.92653
20.1	-0.37501	-0.92441
20.125	-0.38277	-0.96873
20.15	-0.37444	-0.92111
20.175	-0.37501	-0.92438
20.2	-0.37717	-0.93673
20.225	-0.37065	-0.89948
20.25	-0.36232	-0.85188
20.275	-0.33896	-0.71833
20.3	-0.31559	-0.58473
20.325	-0.32775	-0.65421
20.35	-0.34644	-0.76107
20.375	-0.31901	-0.60428
20.4	-0.36733	-0.88047
20.425	-0.3598	-0.83743
20.45	-0.36452	-0.8644
20.475	-0.383	-0.97006
20.5	-0.39984	-1.0663
20.525	-0.38465	-0.97949
20.55	-0.36355	-0.85891
20.575	-0.34242	-0.73807
20.6	-0.33653	-0.70443
20.625	-0.34275	-0.74
20.65	-0.33972	-0.72268
20.675	-0.34215	-0.73652
20.7	-0.35139	-0.78939
20.725	-0.34671	-0.7626
20.75	-0.34915	-0.77659
20.775	-0.37225	-0.90859
20.8	-0.37813	-0.94225
20.825	-0.38021	-0.95411
20.85	-0.39062	-1.01363
20.875	-0.38774	-0.99719
20.9	-0.38222	-0.96559
20.925	-0.38114	-0.95942
20.95	-0.37572	-0.92845
20.975	-0.37531	-0.92612
21	-0.36144	-0.84684
21.025	-0.34002	-0.7244
21.05	-0.32487	-0.63775
21.075	-0.31737	-0.5949
21.1	-0.29947	-0.49257
21.125	-0.29001	-0.43848
21.15	-0.28763	-0.42489
21.175	-0.27732	-0.36592
21.2	-0.27653	-0.36141
21.225	-0.26837	-0.31476
21.25	-0.26065	-0.27064
21.275	-0.2438	-0.17432
21.3	-0.27007	-0.3245
21.325	-0.28935	-0.43472
21.35	-0.26183	-0.27739
21.375	-0.296	-0.47272
21.4	-0.28749	-0.42408
21.425	-0.2798	-0.3801
21.45	-0.31337	-0.57203
21.475	-0.34247	-0.73835
21.5	-0.34284	-0.74048
21.525	-0.33614	-0.70217
21.55	-0.34722	-0.76555
21.575	-0.35283	-0.79761
21.6	-0.35655	-0.81884
21.625	-0.36049	-0.84139
21.65	-0.34559	-0.75622
21.675	-0.3288	-0.66021
21.7	-0.31493	-0.58097
21.725	-0.30219	-0.5081
21.75	-0.29073	-0.4426
21.775	-0.27806	-0.37017
21.8	-0.26728	-0.30854
21.825	-0.27462	-0.35054
21.85	-0.27381	-0.34589
21.875	-0.27173	-0.334
21.9	-0.27736	-0.36616
21.925	-0.27686	-0.36332
21.95	-0.27239	-0.33776
21.975	-0.26845	-0.31526
22	-0.25936	-0.26326
22.025	-0.23095	-0.10088
22.05	-0.21956	-0.03575
22.075	-0.2025	0.06178
22.1	-0.19078	0.12878
22.125	-0.1794	0.19381
22.15	-0.1666	0.26701
22.175	-0.15938	0.30823
22.2	-0.14386	0.39696
22.225	-0.12814	0.48686
22.25	-0.11268	0.57522
22.275	-0.13977	0.42035
22.3	-0.14832	0.37149
22.325	-0.12041	0.53101
22.35	-0.16431	0.28006
22.375	-0.15463	0.3354
22.4	-0.15071	0.3578
22.425	-0.17993	0.1908
22.45	-0.19555	0.10147
22.475	-0.17782	0.20286
22.5	-0.1687	0.25495
22.525	-0.16496	0.27635
22.55	-0.1619	0.29385
22.575	-0.16449	0.27904
22.6	-0.17112	0.24114
22.625	-0.16186	0.29405
22.65	-0.16272	0.28918
22.675	-0.17338	0.22823
22.7	-0.16574	0.2719
22.725	-0.16349	0.28475
22.75	-0.17471	0.22063
22.775	-0.17476	0.22036
22.8	-0.16031	0.30294
22.825	-0.15919	0.30932
22.85	-0.13917	0.42381
22.875	-0.11896	0.53929
22.9	-0.11537	0.55981
22.925	-0.1099	0.5911
22.95	-0.10452	0.62184
22.975	-0.10006	0.64733
23	-0.09927	0.65186
23.025	-0.10584	0.61429
23.05	-0.11863	0.54119
23.075	-0.12661	0.49559
23.1	-0.13501	0.44754
23.125	-0.13946	0.42213
23.15	-0.14149	0.41051
23.175	-0.14372	0.39777
23.2	-0.13111	0.46984
23.225	-0.11176	0.58048
23.25	-0.13636	0.43987
23.275	-0.15742	0.31947
23.3	-0.13766	0.43244
23.325	-0.17706	0.20717
23.35	-0.1709	0.2424
23.375	-0.18171	0.18063
23.4	-0.20038	0.07385
23.425	-0.22002	-0.03839
23.45	-0.226	-0.07256
23.475	-0.20162	0.06677
23.5	-0.17714	0.20673
23.525	-0.16812	0.25828
23.55	-0.16544	0.27359
23.575	-0.16394	0.28221
23.6	-0.15221	0.34923
23.625	-0.14027	0.4175
23.65	-0.13401	0.4533
23.675	-0.12947	0.47925
23.7	-0.12638	0.4969
23.725	-0.11856	0.54159
23.75	-0.11049	0.58775
23.775	-0.08977	0.7062
23.8	-0.07541	0.78824
23.825	-0.07505	0.7903
23.85	-0.08997	0.70501
23.875	-0.09018	0.70382
23.9	-0.09124	0.6978
23.925	-0.09111	0.69853
23.95	-0.11467	0.56385
23.975	-0.1226	0.5185
24	-0.11916	0.53819
24.025	-0.11513	0.56123
24.05	-0.09907	0.653
24.075	-0.08045	0.75947
24.1	-0.07537	0.78847
24.125	-0.07174	0.80923
24.15	-0.06693	0.83677
24.175	-0.04116	0.98405
24.2	-0.02251	1.09067
24.225	-0.05248	0.91936
24.25	-0.07328	0.80047
24.275	-0.06386	0.85431
24.3	-0.10722	0.60643
24.325	-0.11253	0.57607
24.35	-0.12113	0.5269
24.375	-0.15021	0.36068
24.4	-0.17168	0.23795
24.425	-0.16473	0.27765
24.45	-0.15905	0.31015
24.475	-0.15296	0.34496
24.5	-0.14741	0.37671
24.525	-0.14711	0.37839
24.55	-0.14163	0.40971
24.575	-0.13654	0.4388
24.6	-0.13579	0.44309
24.625	-0.12436	0.50847
24.65	-0.11359	0.57001
24.675	-0.10389	0.62545
24.7	-0.09575	0.672
24.725	-0.08762	0.71846
24.75	-0.07602	0.78475
24.775	-0.07451	0.79342
24.8	-0.07043	0.81673
24.825	-0.06208	0.86446
24.85	-0.07099	0.81352
24.875	-0.07885	0.7686
24.9	-0.08587	0.72846
24.925	-0.08763	0.71842
24.95	-0.10211	0.63565
24.975	-0.12061	0.52987
25	-0.12526	0.50329
25.025	-0.1338	0.45445
25.05	-0.14605	0.38446
25.075	-0.1582	0.31501
25.1	-0.1432	0.40076
25.125	-0.12208	0.5215
25.15	-0.07732	0.77737
25.175	-0.04248	0.97649
25.2	-0.04629	0.95474
25.225	-0.0502	0.93237
25.25	-0.01671	1.12381
25.275	-0.06196	0.86514
25.3	-0.06472	0.8494
25.325	-0.06935	0.82293
25.35	-0.11177	0.5804
25.375	-0.13752	0.43324
25.4	-0.13165	0.4668
25.425	-0.12393	0.51089
25.45	-0.13439	0.45114
25.475	-0.13187	0.46551
25.5	-0.12672	0.49495
25.525	-0.12668	0.49516
25.55	-0.11768	0.54664
25.575	-0.11126	0.58334
25.6	-0.11045	0.58796
25.625	-0.09754	0.66179
25.65	-0.0895	0.70772
25.675	-0.07982	0.76308
25.7	-0.07872	0.76937
25.725	-0.08227	0.74907
25.75	-0.08714	0.72119
25.775	-0.08895	0.71087
25.8	-0.08864	0.71262
25.825	-0.08733	0.72011
25.85	-0.08724	0.72064
25.875	-0.10286	0.63135
25.9	-0.10472	0.6207
25.925	-0.1021	0.63568
25.95	-0.0996	0.64996
25.975	-0.10208	0.63583
26	-0.0963	0.66884
26.025	-0.09773	0.66066
26.05	-0.10048	0.64497
26.075	-0.08565	0.72974
26.1	-0.07523	0.78928
26.125	-0.05107	0.92739
26.15	-0.03218	1.03537
26.175	-0.05532	0.90309
26.2	-0.06562	0.84426
26.225	-0.04143	0.98254
26.25	-0.09298	0.68783
26.275	-0.11254	0.57601
26.3	-0.12979	0.47739
26.325	-0.17785	0.20265
26.35	-0.21446	-0.00661
26.375	-0.21797	-0.02665
26.4	-0.217	-0.02113
26.425	-0.2159	-0.01486
26.45	-0.21586	-0.01459
26.475	-0.21144	0.01068
26.5	-0.19639	0.09669
26.525	-0.18875	0.14035
26.55	-0.17874	0.19758
26.575	-0.16543	0.27369
26.6	-0.15847	0.31348
26.625	-0.14914	0.36677
26.65	-0.13506	0.44726
26.675	-0.13077	0.47181
26.7	-0.13348	0.45629
26.725	-0.13738	0.43402
26.75	-0.15873	0.31198
26.775	-0.17253	0.23306
26.8	-0.17598	0.21339
26.825	-0.18866	0.14087
26.85	-0.19551	0.10169
26.875	-0.19023	0.13191
26.9	-0.18658	0.15278
26.925	-0.16466	0.27807
26.95	-0.13988	0.41975
26.975	-0.12572	0.50069
27	-0.11371	0.56933
27.025	-0.10422	0.62359
27.05	-0.10193	0.63665
27.075	-0.09205	0.69312
27.1	-0.05595	0.89949
27.125	-0.04648	0.95367
27.15	-0.06666	0.83827
27.175	-0.07025	0.81776
27.2	-0.05661	0.89575
27.225	-0.10694	0.60804
27.25	-0.11047	0.58783
27.275	-0.11725	0.54908
27.3	-0.15412	0.3383
27.325	-0.16245	0.29073
27.35	-0.15571	0.32924
27.375	-0.14869	0.36938
27.4	-0.13776	0.43186
27.425	-0.13452	0.45039
27.45	-0.13666	0.43815
27.475	-0.13671	0.43786
27.5	-0.14095	0.41359
27.525	-0.1533	0.34301
27.55	-0.16515	0.27525
27.575	-0.18153	0.18165
27.6	-0.17784	0.20271
27.625	-0.17039	0.24534
27.65	-0.16595	0.27067
27.675	-0.15601	0.32753
27.7	-0.14338	0.39971
27.725	-0.13808	0.43004
27.75	-0.12768	0.48947
27.775	-0.11395	0.56797
27.8	-0.10968	0.59236
27.825	-0.09404	0.68178
27.85	-0.08889	0.71123
27.875	-0.07664	0.78125
27.9	-0.07453	0.79329
27.925	-0.07936	0.7657
27.95	-0.08591	0.72823
27.975	-0.08991	0.70538
28	-0.10072	0.64361
28.025	-0.10893	0.59664
28.05	-0.11313	0.57265
28.075	-0.09436	0.67995
28.1	-0.07327	0.80051
28.125	-0.0898	0.70601
28.15	-0.0953	0.67457
28.175	-0.06036	0.87432
28.2	-0.1043	0.6231
28.225	-0.10624	0.61201
28.25	-0.1082	0.60083
28.275	-0.14663	0.38114
28.3	-0.17432	0.22288
28.325	-0.1603	0.30297
28.35	-0.14883	0.36855
28.375	-0.12663	0.49548
28.4	-0.10743	0.60521
28.425	-0.1022	0.6351
28.45	-0.09122	0.69787
28.475	-0.07716	0.77827
28.5	-0.06933	0.82302
28.525	-0.058	0.88777
28.55	-0.06661	0.83856
28.575	-0.06478	0.84901
28.6	-0.07614	0.78407
28.625	-0.08234	0.74868
28.65	-0.07011	0.81854
28.675	-0.06801	0.8306
28.7	-0.07265	0.80404
28.725	-0.07492	0.79106
28.75	-0.07175	0.80922
28.775	-0.06549	0.84499
28.8	-0.06148	0.86789
28.825	-0.04883	0.9402
28.85	-0.04519	0.96101
28.875	-0.04368	0.96963
28.9	-0.055	0.90496
28.925	-0.04526	0.96064
28.95	-0.04778	0.94623
28.975	-0.05225	0.92066
29	-0.05598	0.89936
29.025	-0.05527	0.90341
29.05	-0.03022	1.0466
29.075	-0.01651	1.12495
29.1	-0.03307	1.03032
29.125	-0.03845	0.99954
29.15	-0.00353	1.19916
29.175	-0.05601	0.89914
29.2	-0.04989	0.93416
29.225	-0.03357	1.02746
29.25	-0.07145	0.81093
29.275	-0.09985	0.64854
29.3	-0.09025	0.70342
29.325	-0.08786	0.71707
29.35	-0.08344	0.74234
29.375	-0.07296	0.80227
29.4	-0.07115	0.81263
29.425	-0.07106	0.81315
29.45	-0.07541	0.78826
29.475	-0.08214	0.74981
29.5	-0.08705	0.7217
29.525	-0.09542	0.67385
29.55	-0.11465	0.56394
29.575	-0.11437	0.56556
29.6	-0.11538	0.55978
29.625	-0.11488	0.56265
29.65	-0.11099	0.58485
29.675	-0.09393	0.6824
29.7	-0.0807	0.75802
29.725	-0.07093	0.81387
29.75	-0.05201	0.92203
29.775	-0.04362	0.96998
29.8	-0.04468	0.96394
29.825	-0.04125	0.98357
29.85	-0.03089	1.04275
29.875	-0.0184	1.11414
29.9	-0.00581	1.18612
29.925	0.00388	1.24152
29.95	0.01052	1.27946
29.975	0.01502	1.30519
30	0.02694	1.37333
30.025	0.06432	1.58706
30.05	0.07689	1.6589
30.075	0.05229	1.51826
30.1	0.02963	1.38873
30.125	0.05506	1.53412
30.15	-0.000748805	1.21507
30.175	-0.01302	1.1449
30.2	-0.01857	1.11321
30.225	-0.06709	0.8358
30.25	-0.0988	0.65454
30.275	-0.09078	0.70043
30.3	-0.09213	0.6927
30.325	-0.09692	0.66532
30.35	-0.08386	0.73996
30.375	-0.08647	0.72503
30.4	-0.08268	0.74671
30.425	-0.06527	0.84622
30.45	-0.05936	0.88
30.475	-0.05889	0.88268
30.5	-0.04211	0.97861
30.525	-0.03525	1.01781
30.55	-0.03095	1.04243
30.575	-0.03897	0.99657
30.6	-0.05008	0.93309
30.625	-0.04588	0.95707
30.65	-0.04106	0.98462
30.675	-0.04707	0.95029
30.7	-0.04433	0.96592
30.725	-0.03397	1.02519
30.75	-0.03792	1.0026
30.775	-0.02775	1.06071
30.8	-0.00767	1.17547
30.825	-0.000209436	1.21815
30.85	-0.00226	1.2064
30.875	-0.01317	1.14406
30.9	-0.01419	1.13824
30.925	-0.02126	1.09782
30.95	-0.02281	1.08894
30.975	-0.01831	1.11467
31	0.01736	1.31861
31.025	0.03533	1.4213
31.05	0.01102	1.28235
31.075	-0.01312	1.14433
31.1	0.00166	1.22886
31.125	-0.05895	0.88237
31.15	-0.0732	0.80091
31.175	-0.08149	0.75348
31.2	-0.1283	0.48591
31.225	-0.15372	0.34059
31.25	-0.14559	0.38711
31.275	-0.11687	0.55126
31.3	-0.09635	0.66857
31.325	-0.081	0.75633
31.35	-0.07513	0.78986
31.375	-0.07132	0.81167
31.4	-0.06666	0.83831
31.425	-0.06271	0.86084
31.45	-0.06514	0.84698
31.475	-0.0589	0.88266
31.5	-0.05746	0.89089
31.525	-0.05859	0.88443
31.55	-0.04661	0.95289
31.575	-0.04751	0.94776
31.6	-0.05673	0.89503
31.625	-0.05256	0.91891
31.65	-0.04526	0.96061
31.675	-0.04889	0.93989
31.7	-0.04346	0.97091
31.725	-0.05207	0.92167
31.75	-0.05166	0.92404
31.775	-0.04587	0.95713
31.8	-0.04464	0.96417
31.825	-0.04199	0.9793
31.85	-0.04261	0.97578
31.875	-0.04461	0.96432
31.9	-0.04587	0.95711
31.925	-0.03629	1.0119
31.95	-0.01849	1.11366
31.975	0.01539	1.30735
32	0.04157	1.45697
32.025	0.03008	1.39128
32.05	0.0242	1.35766
32.075	0.06405	1.58548
32.1	0.02302	1.35094
32.125	0.02121	1.34062
32.15	0.02988	1.39013
32.175	0.01016	1.27742
32.2	0.00273	1.23495
32.225	0.0312	1.39772
32.25	0.05822	1.55216
32.275	0.08465	1.70322
32.3	0.10332	1.81
32.325	0.11176	1.8582
32.35	0.11793	1.89349
32.375	0.12369	1.92642
32.4	0.12459	1.93159
32.425	0.12934	1.95872
32.45	0.13487	1.99032
32.475	0.1405	2.02253
32.5	0.16362	2.15468
32.525	0.17965	2.24629
32.55	0.20208	2.37455
32.575	0.23477	2.56138
32.6	0.27944	2.81674
32.625	0.30241	2.94806
32.65	0.32559	3.0806
32.675	0.34849	3.2115
32.7	0.37561	3.36654
32.725	0.37157	3.34342
32.75	0.38716	3.43255
32.775	0.41641	3.59973
32.8	0.41793	3.60842
32.825	0.4419	3.74549
32.85	0.47856	3.955
32.875	0.50548	4.10894
32.9	0.53476	4.27632
32.925	0.55896	4.41466
32.95	0.59882	4.64248
32.975	0.62787	4.80854
33	0.60788	4.69427
33.025	0.59282	4.6082
33.05	0.63274	4.8364
33.075	0.601	4.65496
33.1	0.62604	4.79811
33.125	0.65058	4.93839
33.15	0.65752	4.97803
33.175	0.65402	4.95805
33.2	0.66977	5.04809
33.225	0.70288	5.23736
33.25	0.72664	5.37318
33.275	0.73906	5.44414
33.3	0.76304	5.58128
33.325	0.78132	5.68574
33.35	0.79999	5.79245
33.375	0.82795	5.9523
33.4	0.84482	6.04875
33.425	0.85942	6.13223
33.45	0.87545	6.22387
33.475	0.88044	6.25237
33.5	0.88423	6.27406
33.525	0.89142	6.3151
33.55	0.90642	6.40089
33.575	0.90199	6.37557
33.6	0.90972	6.41973
33.625	0.9225	6.49281
33.65	0.91657	6.45888
33.675	0.91701	6.46139
33.7	0.92786	6.52344
33.725	0.92468	6.50524
33.75	0.91592	6.4552
33.775	0.92076	6.48286
33.8	0.91947	6.47548
33.825	0.90309	6.38185
33.85	0.89278	6.32292
33.875	0.88403	6.27288
33.9	0.87357	6.21307
33.925	0.88967	6.30514
33.95	0.89629	6.34297
33.975	0.86639	6.17205
34	0.84973	6.07682
34.025	0.87015	6.19354
34.05	0.81549	5.8811
34.075	0.8111	5.85596
34.1	0.80806	5.83861
34.125	0.7665	5.60101
34.15	0.73066	5.39617
34.175	0.72782	5.37989
34.2	0.73874	5.44236
34.225	0.72737	5.37734
34.25	0.71283	5.29422
34.275	0.713	5.29522
34.3	0.70354	5.24112
34.325	0.69254	5.17824
34.35	0.67473	5.07643
34.375	0.67205	5.06113
34.4	0.65657	4.9726
34.425	0.63523	4.85063
34.45	0.62646	4.80048
34.475	0.62404	4.78663
34.5	0.61481	4.73389
34.525	0.62643	4.80032
34.55	0.62393	4.78602
34.575	0.62331	4.78247
34.6	0.6179	4.75159
34.625	0.60037	4.65134
34.65	0.57719	4.51884
34.675	0.56115	4.42718
34.7	0.53487	4.27693
34.725	0.50583	4.1109
34.75	0.48699	4.00321
34.775	0.47228	3.91912
34.8	0.46222	3.86162
34.825	0.46624	3.88458
34.85	0.44492	3.76272
34.875	0.44343	3.75419
34.9	0.46624	3.88458
34.925	0.4713	3.91354
34.95	0.43417	3.70127
34.975	0.41624	3.59878
35	0.42634	3.65651
35.025	0.35608	3.25486
35.05	0.36579	3.31038
35.075	0.37366	3.35537
35.1	0.33095	3.11123
35.125	0.313	3.00862
35.15	0.31836	3.03926
35.175	0.32964	3.10374
35.2	0.33945	3.1598
35.225	0.34151	3.17161
35.25	0.32406	3.07185
35.275	0.31108	2.99765
35.3	0.29482	2.90467
35.325	0.26507	2.73462
35.35	0.25157	2.65746
35.375	0.23655	2.57158
35.4	0.22252	2.4914
35.425	0.20144	2.37087
35.45	0.20078	2.36713
35.475	0.18605	2.2829
35.5	0.17135	2.19885
35.525	0.16826	2.1812
35.55	0.16715	2.17485
35.575	0.16106	2.14005
35.6	0.15091	2.08202
35.625	0.15181	2.08714
35.65	0.14771	2.06375
35.675	0.13333	1.98155
35.7	0.12535	1.93589
35.725	0.10453	1.81689
35.75	0.0834	1.69613
35.775	0.07119	1.62633
35.8	0.05554	1.53685
35.825	0.03309	1.40852
35.85	0.03358	1.41133
35.875	0.0496	1.5029
35.9	0.06134	1.57001
35.925	0.04394	1.47052
35.95	0.0181	1.32279
35.975	0.02265	1.34882
36	-0.03966	0.99264
36.025	-0.05124	0.92645
36.05	-0.06066	0.8726
36.075	-0.10352	0.62756
36.1	-0.12504	0.50458
36.125	-0.1205	0.53052
36.15	-0.11117	0.58386
36.175	-0.10014	0.64693
36.2	-0.0934	0.68544
36.225	-0.08815	0.71546
36.25	-0.09571	0.67222
36.275	-0.10835	0.59997
36.3	-0.10963	0.59265
36.325	-0.13022	0.47495
36.35	-0.14916	0.36667
36.375	-0.15401	0.33895
36.4	-0.15158	0.35286
36.425	-0.16712	0.26404
36.45	-0.16742	0.26229
36.475	-0.16295	0.28786
36.5	-0.16296	0.2878
36.525	-0.17267	0.23226
36.55	-0.17732	0.20571
36.575	-0.18385	0.16839
36.6	-0.20176	0.066
36.625	-0.23499	-0.12398
36.65	-0.24785	-0.1975
36.675	-0.25811	-0.25613
36.7	-0.29381	-0.46023
36.725	-0.30514	-0.52497
36.75	-0.30438	-0.52063
36.775	-0.32612	-0.64489
36.8	-0.32541	-0.64083
36.825	-0.30259	-0.51038
36.85	-0.27067	-0.32796
36.875	-0.23617	-0.13073
36.9	-0.23682	-0.13442
36.925	-0.23179	-0.1057
36.95	-0.18539	0.15956
36.975	-0.22668	-0.07644
37	-0.20508	0.04699
37.025	-0.20745	0.03348
37.05	-0.24998	-0.20966
37.075	-0.27763	-0.36771
37.1	-0.27841	-0.37216
37.125	-0.27556	-0.35588
37.15	-0.27598	-0.35827
37.175	-0.28616	-0.41647
37.2	-0.28393	-0.40376
37.225	-0.2877	-0.42527
37.25	-0.30016	-0.49651
37.275	-0.28419	-0.40524
37.3	-0.28273	-0.39684
37.325	-0.30101	-0.50139
37.35	-0.30108	-0.50178
37.375	-0.29761	-0.48191
37.4	-0.30459	-0.52185
37.425	-0.30166	-0.50508
37.45	-0.30045	-0.49818
37.475	-0.29992	-0.49516
37.5	-0.29903	-0.49005
37.525	-0.30334	-0.51471
37.55	-0.29858	-0.48747
37.575	-0.29966	-0.49367
37.6	-0.30757	-0.53885
37.625	-0.31159	-0.56185
37.65	-0.30301	-0.5128
37.675	-0.30643	-0.53233
37.7	-0.30342	-0.51516
37.725	-0.2949	-0.46644
37.75	-0.27914	-0.37637
37.775	-0.27326	-0.34276
37.8	-0.2501	-0.21036
37.825	-0.21673	-0.01961
37.85	-0.19077	0.12882
37.875	-0.21686	-0.02036
37.9	-0.23398	-0.11821
37.925	-0.20681	0.03712
37.95	-0.25135	-0.21747
37.975	-0.24759	-0.19601
38	-0.24661	-0.19037
38.025	-0.28947	-0.43539
38.05	-0.31037	-0.55488
38.075	-0.31055	-0.55589
38.1	-0.30182	-0.50598
38.125	-0.30117	-0.50228
38.15	-0.29825	-0.48559
38.175	-0.30512	-0.52485
38.2	-0.29993	-0.49517
38.225	-0.28364	-0.40206
38.25	-0.27722	-0.36536
38.275	-0.26753	-0.30999
38.3	-0.27119	-0.33089
38.325	-0.27304	-0.34146
38.35	-0.27818	-0.37084
38.375	-0.28485	-0.40901
38.4	-0.28814	-0.42778
38.425	-0.29295	-0.45527
38.45	-0.29528	-0.46862
38.475	-0.29476	-0.46567
38.5	-0.28934	-0.43466
38.525	-0.29286	-0.45477
38.55	-0.28677	-0.41999
38.575	-0.28281	-0.39734
38.6	-0.29145	-0.44672
38.625	-0.28785	-0.42615
38.65	-0.2838	-0.40301
38.675	-0.28911	-0.43332
38.7	-0.29522	-0.46828
38.725	-0.29732	-0.48025
38.75	-0.29611	-0.47335
38.775	-0.30439	-0.52068
38.8	-0.26934	-0.32032
38.825	-0.2531	-0.22751
38.85	-0.28896	-0.43248
38.875	-0.29019	-0.43953
38.9	-0.24599	-0.18682
38.925	-0.29322	-0.45684
38.95	-0.2693	-0.32009
38.975	-0.25129	-0.21714
39	-0.28692	-0.42083
39.025	-0.30291	-0.51225
39.05	-0.27301	-0.34133
39.075	-0.25487	-0.23763
39.1	-0.2434	-0.17207
39.125	-0.24016	-0.1535
39.15	-0.24919	-0.20515
39.175	-0.25565	-0.24208
39.2	-0.26134	-0.27458
39.225	-0.25432	-0.23448
39.25	-0.25861	-0.259
39.275	-0.26555	-0.29869
39.3	-0.27266	-0.33933
39.325	-0.26585	-0.30035
39.35	-0.24945	-0.20663
39.375	-0.23704	-0.13569
39.4	-0.21482	-0.00868
39.425	-0.19089	0.12811
39.45	-0.17072	0.24341
39.475	-0.16258	0.28994
39.5	-0.14417	0.39523
39.525	-0.14859	0.36996
39.55	-0.17043	0.24511
39.575	-0.19166	0.12374
39.6	-0.20005	0.07575
39.625	-0.22517	-0.06781
39.65	-0.23955	-0.15003
39.675	-0.23474	-0.12256
39.7	-0.23234	-0.10879
39.725	-0.22201	-0.04978
39.75	-0.19723	0.0919
39.775	-0.16458	0.27851
39.8	-0.1381	0.42991
39.825	-0.17077	0.24314
39.85	-0.19035	0.13123
39.875	-0.17738	0.20534
39.9	-0.24513	-0.18194
39.925	-0.25252	-0.22417
39.95	-0.24986	-0.20894
39.975	-0.29325	-0.45702
40	-0.32275	-0.62565
40.025	-0.30772	-0.53975
40.05	-0.29086	-0.44333
40.075	-0.28684	-0.42038
40.1	-0.27628	-0.35999
40.125	-0.26547	-0.29822
40.15	-0.2595	-0.2641
40.175	-0.25132	-0.21731
40.2	-0.24074	-0.15685
40.225	-0.22585	-0.07174
40.25	-0.2318	-0.10574
40.275	-0.23937	-0.14899
40.3	-0.23785	-0.1403
40.325	-0.23841	-0.14352
40.35	-0.23604	-0.12995
40.375	-0.23042	-0.09784
40.4	-0.22983	-0.0945
40.425	-0.23055	-0.09859
40.45	-0.21957	-0.0358
40.475	-0.21665	-0.01911
40.5	-0.21374	-0.00248
40.525	-0.21646	-0.01804
40.55	-0.23128	-0.10274
40.575	-0.24628	-0.1885
40.6	-0.24888	-0.20336
40.625	-0.25805	-0.2558
40.65	-0.25767	-0.2536
40.675	-0.25383	-0.23165
40.7	-0.26794	-0.31235
40.725	-0.25877	-0.25988
40.75	-0.22161	-0.04751
40.775	-0.2136	-0.0017
40.8	-0.23156	-0.10437
40.825	-0.25406	-0.233
40.85	-0.23697	-0.13529
40.875	-0.28665	-0.41926
40.9	-0.28772	-0.42541
40.925	-0.28413	-0.40488
40.95	-0.31373	-0.57408
40.975	-0.34058	-0.72759
41	-0.32604	-0.64446
41.025	-0.30058	-0.49892
41.05	-0.28582	-0.41454
41.075	-0.26782	-0.31165
41.1	-0.27504	-0.35291
41.125	-0.26122	-0.27393
41.15	-0.24332	-0.1716
41.175	-0.2295	-0.0926
41.2	-0.21101	0.01312
41.225	-0.18888	0.13962
41.25	-0.18368	0.16934
41.275	-0.18237	0.17686
41.3	-0.16326	0.28608
41.325	-0.1523	0.34875
41.35	-0.16344	0.28503
41.375	-0.16886	0.25406
41.4	-0.17218	0.23506
41.425	-0.18049	0.18757
41.45	-0.1877	0.14634
41.475	-0.19794	0.0878
41.5	-0.19663	0.09531
41.525	-0.1941	0.10979
41.55	-0.19303	0.11591
41.575	-0.19017	0.13224
41.6	-0.1888	0.14007
41.625	-0.19265	0.11806
41.65	-0.19875	0.0832
41.675	-0.20101	0.07027
41.7	-0.20192	0.06507
41.725	-0.17836	0.19974
41.75	-0.16842	0.2566
41.775	-0.19085	0.12838
41.8	-0.19156	0.12431
41.825	-0.1587	0.31216
41.85	-0.20018	0.07504
41.875	-0.17837	0.1997
41.9	-0.16625	0.26896
41.925	-0.18765	0.14664
41.95	-0.1937	0.11208
41.975	-0.18332	0.1714
42	-0.16583	0.27136
42.025	-0.14265	0.40387
42.05	-0.13146	0.46787
42.075	-0.12586	0.49984
42.1	-0.13135	0.46848
42.125	-0.12061	0.52991
42.15	-0.11417	0.56669
42.175	-0.11335	0.57138
42.2	-0.10057	0.64446
42.225	-0.10606	0.61305
42.25	-0.11594	0.55657
42.275	-0.12268	0.51807
42.3	-0.12187	0.52267
42.325	-0.11563	0.55836
42.35	-0.10703	0.60752
42.375	-0.10312	0.62986
42.4	-0.0963	0.66886
42.425	-0.08605	0.72745
42.45	-0.06886	0.82572
42.475	-0.05093	0.92818
42.5	-0.03896	0.99662
42.525	-0.03259	1.03307
42.55	-0.04187	0.97999
42.575	-0.04973	0.93504
42.6	-0.05364	0.91269
42.625	-0.05225	0.92066
42.65	-0.05968	0.87821
42.675	-0.05569	0.90099
42.7	-0.03252	1.03343
42.725	-0.01136	1.15443
42.75	-0.02344	1.08538
42.775	-0.03254	1.03333
42.8	-0.00348	1.19945
42.825	-0.05028	0.93195
42.85	-0.04591	0.95692
42.875	-0.04854	0.94185
42.9	-0.07179	0.80897
42.925	-0.09505	0.67601
42.95	-0.08834	0.71433
42.975	-0.07917	0.7668
43	-0.08244	0.7481
43.025	-0.08346	0.74223
43.05	-0.10082	0.64299
43.075	-0.11694	0.55085
43.1	-0.12719	0.49226
43.125	-0.14923	0.3663
43.15	-0.16579	0.27164
43.175	-0.15141	0.35381
43.2	-0.13784	0.4314
43.225	-0.12666	0.49532
43.25	-0.10265	0.63258
43.275	-0.08263	0.747
43.3	-0.06661	0.83859
43.325	-0.05654	0.89611
43.35	-0.03806	1.0018
43.375	-0.04673	0.95221
43.4	-0.06257	0.86164
43.425	-0.06904	0.82467
43.45	-0.07629	0.78324
43.475	-0.08243	0.74811
43.5	-0.08237	0.7485
43.525	-0.07411	0.79569
43.55	-0.06656	0.83886
43.575	-0.06572	0.84365
43.6	-0.05571	0.9009
43.625	-0.04198	0.97937
43.65	-0.02992	1.04828
43.675	-0.0015	1.21077
43.7	0.02475	1.36084
43.725	-0.000836292	1.21457
43.75	-0.02201	1.0935
43.775	0.00372	1.24059
43.8	-0.03338	1.02853
43.825	-0.03514	1.01846
43.85	-0.03475	1.02069
43.875	-0.06825	0.82922
43.9	-0.08458	0.73586
43.925	-0.07998	0.76217
43.95	-0.07059	0.81582
43.975	-0.06089	0.87128
44	-0.07098	0.81361
44.025	-0.06989	0.81983
44.05	-0.06418	0.85245
44.075	-0.06732	0.8345
44.1	-0.05868	0.88391
44.125	-0.04605	0.9561
44.15	-0.04514	0.96133
44.175	-0.03594	1.01389
44.2	-0.02162	1.09577
44.225	-0.01646	1.12524
44.25	-0.02266	1.08979
44.275	-0.01238	1.1486
44.3	-0.01666	1.1241
44.325	-0.02071	1.10094
44.35	-0.02229	1.09191
44.375	-0.0242	1.08102
44.4	-0.03704	1.0076
44.425	-0.03974	0.99215
44.45	-0.04959	0.93585
44.475	-0.05203	0.92192
44.5	-0.05621	0.89801
44.525	-0.06699	0.83639
44.55	-0.07588	0.78558
44.575	-0.07509	0.79008
44.6	-0.07438	0.79415
44.625	-0.06471	0.84941
44.65	-0.02855	1.05614
44.675	-0.01008	1.16173
44.7	-0.03931	0.99466
44.725	-0.03528	1.01765
44.75	-0.00874	1.16939
44.775	-0.05941	0.87971
44.8	-0.05515	0.90407
44.825	-0.05905	0.88181
44.85	-0.10103	0.64183
44.875	-0.11369	0.56944
44.9	-0.0949	0.67684
44.925	-0.07276	0.80342
44.95	-0.04654	0.95332
44.975	-0.03482	1.02029
45	-0.0264	1.06844
45.025	-0.01709	1.12167
45.05	-0.00674	1.18084
45.075	-0.00699	1.17938
45.1	-0.00456	1.19326
45.125	-0.01828	1.11487
45.15	-0.04249	0.97647
45.175	-0.07183	0.80871
45.2	-0.09468	0.6781
45.225	-0.11016	0.58961
45.25	-0.12873	0.48346
45.275	-0.14472	0.39205
45.3	-0.15109	0.35563
45.325	-0.13663	0.43831
45.35	-0.1149	0.5625
45.375	-0.09898	0.65355
45.4	-0.07233	0.8059
45.425	-0.05518	0.90392
45.45	-0.05607	0.89882
45.475	-0.05049	0.93074
45.5	-0.04716	0.94975
45.525	-0.05812	0.8871
45.55	-0.07503	0.79044
45.575	-0.08295	0.74516
45.6	-0.08041	0.7597
45.625	-0.06088	0.87132
45.65	-0.03752	1.00485
45.675	-0.06525	0.84637
45.7	-0.07817	0.77247
45.725	-0.05388	0.91135
45.75	-0.09728	0.66323
45.775	-0.09531	0.67453
45.8	-0.09104	0.69892
45.825	-0.11123	0.5835
45.85	-0.13375	0.45476
45.875	-0.11321	0.57219
45.9	-0.09174	0.69492
45.925	-0.093	0.68771
45.95	-0.08955	0.70742
45.975	-0.08788	0.717
46	-0.0969	0.66539
46.025	-0.09797	0.65929
46.05	-0.10187	0.63698
46.075	-0.11514	0.56114
46.1	-0.11578	0.55751
46.125	-0.10014	0.64691
46.15	-0.08918	0.70955
46.175	-0.07722	0.77793
46.2	-0.06899	0.82496
46.225	-0.06468	0.84958
46.25	-0.06997	0.81939
46.275	-0.05057	0.93027
46.3	-0.05543	0.90247
46.325	-0.05816	0.88689
46.35	-0.05105	0.92753
46.375	-0.06472	0.84936
46.4	-0.06867	0.82679
46.425	-0.06605	0.84176
46.45	-0.07398	0.79646
46.475	-0.08044	0.75953
46.5	-0.08417	0.73819
46.525	-0.08779	0.71748
46.55	-0.08336	0.74283
46.575	-0.07448	0.79357
46.6	-0.03792	1.00259
46.625	-0.01546	1.13095
46.65	-0.03927	0.99486
46.675	-0.05634	0.8973
46.7	-0.03485	1.02016
46.725	-0.09149	0.69634
46.75	-0.10066	0.64394
46.775	-0.09954	0.65033
46.8	-0.12868	0.48375
46.825	-0.15001	0.36179
46.85	-0.12313	0.51548
46.875	-0.09712	0.66414
46.9	-0.09003	0.70469
46.925	-0.08188	0.75127
46.95	-0.08819	0.71522
46.975	-0.08838	0.71411
47	-0.09408	0.68157
47.025	-0.09524	0.67492
47.05	-0.09954	0.65031
47.075	-0.10861	0.5985
47.1	-0.11698	0.55061
47.125	-0.11497	0.56215
47.15	-0.11301	0.57335
47.175	-0.11261	0.57564
47.2	-0.10678	0.60894
47.225	-0.10798	0.60209
47.25	-0.10158	0.63865
47.275	-0.09984	0.6486
47.3	-0.09667	0.66671
47.325	-0.08795	0.71657
47.35	-0.08277	0.74617
47.375	-0.0888	0.71172
47.4	-0.08198	0.75069
47.425	-0.07215	0.80689
47.45	-0.07963	0.76412
47.475	-0.08122	0.75505
47.5	-0.06899	0.82497
47.525	-0.08143	0.75388
47.55	-0.08155	0.7532
47.575	-0.05496	0.90517
47.6	-0.04563	0.95853
47.625	-0.0718	0.80889
47.65	-0.08746	0.71936
47.675	-0.06298	0.85933
47.7	-0.10354	0.62746
47.725	-0.10286	0.63132
47.75	-0.09407	0.68161
47.775	-0.12056	0.53019
47.8	-0.13309	0.45851
47.825	-0.13051	0.47327
47.85	-0.11738	0.54835
47.875	-0.11484	0.56284
47.9	-0.11193	0.57953
47.925	-0.10745	0.60513
47.95	-0.10383	0.62582
47.975	-0.10368	0.62666
48	-0.09415	0.68115
48.025	-0.08044	0.7595
48.05	-0.07224	0.80637
48.075	-0.06139	0.86843
48.1	-0.06315	0.85837
48.125	-0.06748	0.83358
48.15	-0.06915	0.82406
48.175	-0.07112	0.81277
48.2	-0.06795	0.83089
48.225	-0.06822	0.82938
48.25	-0.0709	0.81406
48.275	-0.07602	0.78477
48.3	-0.07163	0.80989
48.325	-0.06828	0.82901
48.35	-0.05515	0.90406
48.375	-0.05713	0.89279
48.4	-0.05854	0.88472
48.425	-0.05724	0.89213
48.45	-0.05708	0.89305
48.475	-0.05846	0.88518
48.5	-0.05436	0.90857
48.525	-0.05237	0.91999
48.55	-0.02833	1.05739
48.575	-0.01098	1.15656
48.6	-0.03231	1.03464
48.625	-0.03808	1.00165
48.65	-0.0068	1.18046
48.675	-0.05078	0.92905
48.7	-0.05154	0.92471
48.725	-0.04066	0.98689
48.75	-0.06605	0.84176
48.775	-0.0881	0.71574
48.8	-0.0878	0.71744
48.825	-0.06385	0.85434
48.85	-0.05074	0.92927
48.875	-0.04975	0.93494
48.9	-0.04022	0.98944
48.925	-0.03115	1.0413
48.95	-0.03118	1.0411
48.975	-0.03933	0.9945
49	-0.03851	0.99921
49.025	-0.04563	0.95849
49.05	-0.03798	1.00225
49.075	-0.04331	0.97176
49.1	-0.04659	0.95301
49.125	-0.03611	1.01293
49.15	-0.03306	1.03034
49.175	-0.01907	1.11033
49.2	-0.01185	1.15158
49.225	-0.00201	1.20786
49.25	-0.00409	1.19596
49.275	-0.02626	1.06921
49.3	-0.03317	1.02971
49.325	-0.04182	0.9803
49.35	-0.06304	0.85898
49.375	-0.07654	0.78181
49.4	-0.0769	0.77976
49.425	-0.08277	0.74622
49.45	-0.0783	0.77177
49.475	-0.06799	0.83066
49.5	-0.04365	0.9698
49.525	-0.00297	1.20237
49.55	0.02687	1.37295
49.575	0.02119	1.34048
49.6	0.01325	1.29512
49.625	0.04446	1.47349
49.65	-0.00966	1.16413
49.675	0.00202	1.23091
49.7	0.00634	1.2556
49.725	-0.03194	1.03674
49.75	-0.05875	0.8835
49.775	-0.06555	0.84461
49.8	-0.06952	0.82196
49.825	-0.07553	0.78758
49.85	-0.08103	0.75615
49.875	-0.09166	0.69537
49.9	-0.10039	0.64547
49.925	-0.1066	0.60996
49.95	-0.09263	0.68982
[truncated: 2,042 more rows]
