# Supplementary material for: Corticothalamic gating of population auditory thalamocortical transmission in mouse
Source: eLife. 2021 May 24;10:e56645. doi: 10.7554/eLife.56645 (PMC8186908; doi:10.7554/eLife.56645)
Supplement: Figure 2—figure supplement 6—source data 1. [file elife-56645-fig2-figsupp6-data1.xlsx]

## Sheet: Figure 2-figure supplement 6
Cell#1		Cell#2		Cell#3		Cell#4
Bin center	Relative frequency	Bin center	Relative frequency	Bin center	Relative frequency	Bin center	Relative frequency
-55.5	0	-73.5	0	-75.5	0.0227652	-74.5	0
-54.5	0.00476486	-72.5	0.012991	-74.5	0.0784252	-73.5	0
-53.5	0.118086	-71.5	0.164244	-73.5	0.0899123	-72.5	9.66744e-05
-52.5	0.170706	-70.5	0.112898	-72.5	0.0885547	-71.5	0.0104408
-51.5	0.0360472	-69.5	0.0414476	-71.5	0.0579574	-70.5	0.0292923
-50.5	0.0335612	-68.5	0.0395917	-70.5	0.0502297	-69.5	0.0482405
-49.5	0.0169878	-67.5	0.0272193	-69.5	0.0181704	-68.5	0.113979
-48.5	0.0198881	-66.5	0.0142283	-68.5	0.0149332	-67.5	0.070669
-47.5	0.0273462	-65.5	0.0167028	-67.5	0.0171261	-66.5	0.0406999
-46.5	0.0116014	-64.5	0.0266007	-66.5	0.0161863	-65.5	0.0328693
-45.5	0.0250673	-63.5	0.0473245	-65.5	0.0215121	-64.5	0.0417633
-44.5	0.072716	-62.5	0.0751624	-64.5	0.0275689	-63.5	0.0247486
-43.5	0.0720945	-61.5	0.0494896	-63.5	0.0351921	-62.5	0.012471
-42.5	0.113321	-60.5	0.0612434	-62.5	0.0406224	-61.5	0.0119876
-41.5	0.0689869	-59.5	0.103	-61.5	0.0417711	-60.5	0.00444702
-40.5	0.050549	-58.5	0.0547479	-60.5	0.0470969	-59.5	0.0108275
-39.5	0.0424694	-57.5	0.0238169	-59.5	0.0407268	-58.5	0.00734725
-38.5	0.045577	-56.5	0.012991	-58.5	0.0514829	-57.5	0.0102475
-37.5	0.0335612	-55.5	0.0123724	-57.5	0.0402047	-56.5	0.0231052
-36.5	0.0169878	-54.5	0.0102072	-56.5	0.0504386	-55.5	0.045727
-35.5	0.00310752	-53.5	0.00804207	-55.5	0.0391604	-54.5	0.0347061
-34.5	0.00269318	-52.5	0.00711414	-54.5	0.0303885	-53.5	0.0325793
-33.5	0.00269318	-51.5	0.00649552	-53.5	0.0264202	-52.5	0.0507541
-32.5	0.00207168	-50.5	0.00680483	-52.5	0.0157686	-51.5	0.0432135
-31.5	0.00207168	-49.5	0.00494896	-51.5	0.0056391	-50.5	0.050464
-30.5	0.00248602	-48.5	0.00587689	-50.5	0.00918964	-49.5	0.0467904
-29.5	0.00165734	-47.5	0.00402103	-49.5	0.00772765	-48.5	0.0541377
-28.5	0.00145018	-46.5	0.00433034	-48.5	0.00637009	-47.5	0.0360596
-27.5	0.00145018	-45.5	0.00433034	-47.5	0.00313283	-46.5	0.0366396
-26.5	0	-44.5	0.00433034	-46.5	0.00355054	-45.5	0.0241686
		-43.5	0.00402103	-45.5	0.00177527	-44.5	0.0132444
		-42.5	0.00340241	-44.5	0	-43.5	0.0109242
		-41.5	0.00525827			-42.5	0.00957077
		-40.5	0.00278379			-41.5	0.00435035
		-39.5	0.00402103			-40.5	0.00386698
		-38.5	0.00463965			-39.5	0.00232019
		-37.5	0.00340241			-38.5	0.00261021
		-36.5	0.00433034			-37.5	0.00222351
		-35.5	0.00494896			-36.5	0.00087007
		-34.5	0.00061862			-35.5	0.000290023
						-34.5	0.000193349
						-33.5	0.000290023
						-32.5	0.000483372
						-31.5	0.000193349
						-30.5	9.66744e-05
