# Supplementary material for: Corticothalamic gating of population auditory thalamocortical transmission in mouse
Source: eLife. 2021 May 24;10:e56645. doi: 10.7554/eLife.56645 (PMC8186908; doi:10.7554/eLife.56645)
Supplement: Figure 2—source data 1. [file elife-56645-fig2-data1.xlsx]

## Sheet: Figure 2C
Time	Df/f (Flavoprotein signal)
(s)	IC	MGB	TRN	AC
0.025	-0.247223	-0.326433	-0.14868	-0.234739
0.05	-0.242378	-0.315927	-0.164853	-0.216948
0.075	-0.162906	-0.29106	-0.131772	-0.204735
0.1	-0.151105	-0.259169	-0.121857	-0.206056
0.125	-0.0979878	-0.260041	-0.117768	-0.214829
0.15	-0.151389	-0.277006	-0.138158	-0.232286
0.175	-0.222272	-0.289898	-0.169577	-0.249925
0.2	-0.25692	-0.275439	-0.232287	-0.265093
0.225	-0.3272	-0.298983	-0.287951	-0.296097
0.25	-0.414488	-0.329925	-0.34196	-0.32655
0.275	-0.445298	-0.374051	-0.392297	-0.346468
0.3	-0.455227	-0.40651	-0.438122	-0.377464
0.325	-0.54317	-0.473297	-0.49825	-0.409121
0.35	-0.664476	-0.479674	-0.530403	-0.418249
0.375	-0.676256	-0.504365	-0.570121	-0.432068
0.4	-0.646987	-0.532359	-0.549586	-0.44814
0.425	-0.636258	-0.532578	-0.588396	-0.455795
0.45	-0.678814	-0.498941	-0.588327	-0.462827
0.475	-0.663612	-0.520665	-0.600419	-0.46777
0.5	-0.634882	-0.502136	-0.606862	-0.481984
0.525	-0.648628	-0.453735	-0.622884	-0.489384
0.55	-0.566796	-0.441906	-0.619853	-0.479165
0.575	-0.464615	-0.41062	-0.595314	-0.461574
0.6	-0.462443	-0.379848	-0.612772	-0.44602
0.625	-0.425581	-0.364524	-0.594881	-0.415962
0.65	-0.296782	-0.32186	-0.519173	-0.383692
0.675	-0.300117	-0.327765	-0.472383	-0.338981
0.7	-0.217402	-0.27956	-0.438267	-0.303819
0.725	-0.192096	-0.232475	-0.3624	-0.269677
0.75	-0.231355	-0.210248	-0.287116	-0.228369
0.775	-0.0931334	-0.16462	-0.206973	-0.172992
0.8	-0.0349325	-0.113442	-0.155794	-0.131505
0.825	-0.150118	-0.137296	-0.12789	-0.131771
0.85	-0.205653	-0.127229	-0.113875	-0.110045
0.875	-0.128523	-0.0556129	-0.0939103	-0.0732507
0.9	-0.352102	-0.135112	-0.134819	-0.126778
0.925	-0.258243	-0.140863	-0.12159	-0.121894
0.95	-0.21833	-0.13379	-0.10778	-0.115685
0.975	-0.374418	-0.192069	-0.139398	-0.160543
1	-0.406006	-0.205971	-0.175774	-0.205826
1.025	-0.343315	-0.199968	-0.180251	-0.19757
1.05	-0.259971	-0.218785	-0.123712	-0.182831
1.075	-0.186467	-0.23562	-0.169652	-0.18365
1.1	-0.0530202	-0.238443	-0.171366	-0.175943
1.125	-0.00121759	-0.234288	-0.163713	-0.153995
1.15	0.0219633	-0.212683	-0.171978	-0.150326
1.175	0.0467379	-0.200954	-0.218383	-0.153575
1.2	0.0670328	-0.214614	-0.219591	-0.126582
1.225	0.0239535	-0.221548	-0.223194	-0.120179
1.25	-0.0138951	-0.190136	-0.229072	-0.116698
1.275	-0.0689318	-0.216687	-0.245764	-0.0998002
1.3	-0.0765857	-0.225596	-0.238248	-0.090847
1.325	-0.177129	-0.188441	-0.270878	-0.0991854
1.35	-0.170743	-0.24075	-0.27377	-0.102019
1.375	-0.0890832	-0.215823	-0.256769	-0.11392
1.4	-0.180793	-0.211408	-0.252592	-0.142641
1.425	-0.28674	-0.20103	-0.260504	-0.185423
1.45	-0.233941	-0.191894	-0.275567	-0.217468
1.475	-0.280178	-0.17916	-0.269593	-0.258667
1.5	-0.349588	-0.189125	-0.281225	-0.312962
1.525	-0.342448	-0.253244	-0.314245	-0.34101
1.55	-0.412856	-0.281034	-0.332783	-0.37126
1.575	-0.50373	-0.327413	-0.364664	-0.394875
1.6	-0.561122	-0.363786	-0.418732	-0.404912
1.625	-0.582524	-0.377228	-0.450065	-0.407674
1.65	-0.587025	-0.415831	-0.455712	-0.407709
1.675	-0.573339	-0.413028	-0.477945	-0.404893
1.7	-0.609638	-0.416509	-0.5165	-0.388467
1.725	-0.484631	-0.387344	-0.438198	-0.364782
1.75	-0.282294	-0.346453	-0.384272	-0.322832
1.775	-0.16441	-0.298818	-0.400993	-0.292328
1.8	-0.105315	-0.319299	-0.363009	-0.302247
1.825	-0.0764103	-0.35787	-0.338489	-0.307388
1.85	0.0354157	-0.324738	-0.29436	-0.275623
1.875	-0.0859709	-0.370925	-0.259624	-0.315641
1.9	-0.0775849	-0.374697	-0.231204	-0.290586
1.925	-0.0979851	-0.33006	-0.223225	-0.275217
1.95	-0.18048	-0.33386	-0.254356	-0.279956
1.975	-0.275978	-0.323648	-0.24156	-0.261759
2	-0.210329	-0.242314	-0.183115	-0.226746
2.025	-0.116815	-0.191518	-0.130412	-0.196391
2.05	-0.0814088	-0.13673	-0.0733446	-0.164572
2.075	0.00572151	-0.100689	-0.0609267	-0.15832
2.1	0.0431954	-0.0633418	-0.0422666	-0.154982
2.125	0.114774	-0.0190317	-0.0342672	-0.144757
2.15	0.228214	0.00073292	0.017491	-0.125989
2.175	0.301143	0.0131837	0.029604	-0.126912
2.2	0.360103	0.0541948	0.0310786	-0.0984546
2.225	0.498841	0.0925157	0.063737	-0.0591323
2.25	0.511551	0.0911815	0.0824525	-0.0363283
2.275	0.560657	0.13055	0.0658222	0.0114937
2.3	0.644591	0.177388	0.135139	0.0603643
2.325	0.617573	0.173123	0.174376	0.0943452
2.35	0.685372	0.196054	0.182835	0.127703
2.375	0.711073	0.230479	0.198949	0.160413
2.4	0.790395	0.265219	0.237429	0.189232
2.425	0.795267	0.305953	0.229389	0.217736
2.45	0.771732	0.333662	0.232416	0.246516
2.475	0.797079	0.377099	0.246745	0.270357
2.5	0.845838	0.402682	0.235121	0.291546
2.525	0.773937	0.423958	0.245289	0.30852
2.55	0.767723	0.458971	0.262687	0.328281
2.575	0.801461	0.482998	0.25484	0.357857
2.6	0.805029	0.504933	0.248509	0.37972
2.625	0.832153	0.534701	0.276564	0.394495
2.65	0.918752	0.599502	0.263004	0.425937
2.675	1.03327	0.655643	0.29415	0.450403
2.7	1.06094	0.721746	0.356554	0.486689
2.725	1.27096	0.828448	0.387936	0.560461
2.75	1.42612	0.92252	0.423015	0.620421
2.775	1.44944	0.924581	0.440204	0.622218
2.8	1.4259	0.94115	0.462979	0.641858
2.825	1.54121	0.978751	0.498475	0.68845
2.85	1.4053	0.918727	0.475151	0.654972
2.875	1.45128	0.887597	0.504074	0.675848
2.9	1.52862	0.853502	0.475747	0.697291
2.925	1.39151	0.808211	0.454807	0.673643
2.95	1.32665	0.782693	0.417456	0.659929
2.975	1.41164	0.811894	0.474414	0.702415
3	1.50889	0.823724	0.501769	0.737049
3.025	1.62966	0.855497	0.554787	0.776297
3.05	1.69883	0.88353	0.572903	0.820766
3.075	1.68557	0.877843	0.547739	0.843825
3.1	1.60168	0.912281	0.543285	0.86442
3.125	1.49628	0.941558	0.563489	0.885653
3.15	1.48615	0.949136	0.581302	0.897242
3.175	1.4434	0.962548	0.513873	0.901473
3.2	1.34623	0.96579	0.454391	0.911732
3.225	1.2898	0.972904	0.438007	0.91686
3.25	1.26891	0.963576	0.414564	0.936646
3.275	1.24992	0.943706	0.392256	0.955421
3.3	1.33288	0.950731	0.437402	0.980093
3.325	1.43442	0.906541	0.424616	1.02542
3.35	1.45256	0.89788	0.392024	1.05292
3.375	1.46068	0.898098	0.392584	1.08152
3.4	1.49627	0.910207	0.416842	1.11711
3.425	1.38419	0.897605	0.404399	1.13974
3.45	1.3618	0.905635	0.424477	1.1453
3.475	1.44007	0.909951	0.441151	1.15923
3.5	1.29473	0.898847	0.407362	1.15676
3.525	1.26031	0.867734	0.445247	1.15085
3.55	1.23935	0.846178	0.402397	1.16293
3.575	1.18441	0.832087	0.36815	1.16833
3.6	1.09669	0.805005	0.370796	1.17842
3.625	1.18189	0.818841	0.333367	1.19838
3.65	1.15495	0.814238	0.299086	1.2143
3.675	1.11955	0.8537	0.29613	1.23548
3.7	1.30737	0.903514	0.264362	1.29137
3.725	1.35624	0.940345	0.269546	1.32871
3.75	1.39731	0.942413	0.285192	1.32643
3.775	1.43187	0.952965	0.310451	1.32299
3.8	1.59524	0.941572	0.341068	1.36778
3.825	1.51789	0.859735	0.326972	1.33668
3.85	1.60014	0.886936	0.36654	1.35281
3.875	1.72294	0.86314	0.373905	1.3773
3.9	1.66848	0.791541	0.357851	1.35351
3.925	1.62308	0.781017	0.341596	1.32768
3.95	1.62192	0.751393	0.323375	1.34206
3.975	1.6035	0.739229	0.293136	1.34958
4	1.53752	0.716792	0.262168	1.34934
4.025	1.46799	0.749093	0.256041	1.35728
4.05	1.29308	0.730773	0.273317	1.34592
4.075	1.1829	0.694788	0.276622	1.34564
4.1	1.16066	0.666602	0.274988	1.31969
4.125	1.08997	0.68096	0.328346	1.30597
4.15	1.05481	0.650658	0.350701	1.30994
4.175	1.08274	0.622597	0.373903	1.29745
4.2	1.07317	0.622951	0.360609	1.27837
4.225	1.0365	0.609407	0.350067	1.26727
4.25	1.0649	0.561601	0.326077	1.26011
4.275	1.08002	0.53972	0.268052	1.25539
4.3	1.00355	0.560415	0.272084	1.25101
4.325	0.903516	0.514447	0.260312	1.24073
4.35	0.906024	0.501914	0.249729	1.23515
4.375	0.882204	0.535565	0.276652	1.21456
4.4	0.858553	0.542934	0.300791	1.19236
4.425	0.814366	0.520768	0.331132	1.19124
4.45	0.87011	0.540523	0.369348	1.18416
4.475	0.843744	0.554636	0.343164	1.15719
4.5	0.803694	0.511742	0.335124	1.13891
4.525	0.82687	0.514483	0.333688	1.1362
4.55	0.871428	0.516894	0.299257	1.12359
4.575	0.738073	0.497365	0.267915	1.10234
4.6	0.718619	0.471077	0.20003	1.09441
4.625	0.726809	0.478743	0.168388	1.08083
4.65	0.672421	0.461109	0.175284	1.07022
4.675	0.683528	0.468592	0.149651	1.08511
4.7	0.725353	0.465246	0.181668	1.10079
4.725	0.631881	0.423395	0.167259	1.06707
4.75	0.556762	0.386196	0.118779	1.04326
4.775	0.615014	0.418684	0.130122	1.0514
4.8	0.50485	0.354948	0.108456	0.98942
4.825	0.52264	0.299514	0.0946186	0.966841
4.85	0.547153	0.28636	0.0805986	0.942139
4.875	0.498324	0.24081	0.00554776	0.886491
4.9	0.397977	0.179467	-0.0543754	0.843475
4.925	0.332801	0.181873	-0.0294564	0.826867
4.95	0.380022	0.206618	-0.0415473	0.817446
4.975	0.368968	0.200555	-0.0730737	0.809296
5	0.382807	0.203079	-0.0890644	0.78841
5.025	0.385108	0.207676	-0.0799839	0.769346
5.05	0.349883	0.195221	-0.110295	0.761298
5.075	0.301682	0.180891	-0.0345399	0.747434
5.1	0.24226	0.194623	-0.0286898	0.728648
5.125	0.237728	0.177881	-0.0472734	0.707079
5.15	0.243312	0.121806	-0.0307773	0.679046
5.175	0.131549	0.102937	-0.0585206	0.650545
5.2	0.0381364	0.0425052	-0.134903	0.621428
5.225	0.0639352	-0.014668	-0.113298	0.594086
5.25	-0.016004	0.00567375	-0.165805	0.58307
5.275	0.0324673	-0.0196215	-0.256235	0.548583
5.3	0.09752	-0.0376246	-0.271023	0.532755
5.325	0.174103	-0.0533617	-0.288325	0.527236
5.35	0.175936	-0.0914043	-0.335997	0.524429
5.375	0.159534	-0.0748272	-0.317068	0.51977
5.4	0.158956	-0.0837944	-0.277784	0.526377
5.425	0.146627	-0.0704652	-0.252386	0.506081
5.45	0.127833	-0.0711158	-0.238824	0.48612
5.475	0.0446121	-0.0756517	-0.210123	0.469809
5.5	-0.0752126	-0.0896575	-0.191526	0.448138
5.525	-0.159177	-0.15474	-0.174784	0.403779
5.55	-0.255468	-0.186819	-0.165877	0.377106
5.575	-0.317605	-0.22252	-0.186292	0.338629
5.6	-0.305455	-0.294484	-0.232718	0.291916
5.625	-0.332766	-0.321631	-0.284807	0.258404
5.65	-0.357186	-0.33993	-0.301682	0.265659
5.675	-0.279097	-0.383394	-0.300889	0.244705
5.7	-0.334166	-0.436573	-0.310344	0.191502
5.725	-0.379482	-0.467901	-0.346901	0.146755
5.75	-0.323303	-0.477948	-0.3124	0.140709
5.775	-0.538481	-0.541293	-0.36046	0.0807427
5.8	-0.581017	-0.535412	-0.338116	0.0591914
5.825	-0.562896	-0.541947	-0.327488	0.0419093
5.85	-0.620158	-0.552273	-0.358743	0.00131402
5.875	-0.683281	-0.540191	-0.363722	-0.0364028
5.9	-0.635237	-0.514966	-0.365857	-0.0528333
5.925	-0.68046	-0.495839	-0.416091	-0.0506662
5.95	-0.657903	-0.478949	-0.382606	-0.057791
5.975	-0.611848	-0.460156	-0.396011	-0.0813522
6	-0.685912	-0.50023	-0.450902	-0.0942481
6.025	-0.694393	-0.519043	-0.45325	-0.119016
6.05	-0.750915	-0.557791	-0.380873	-0.137316
6.075	-0.833557	-0.611365	-0.391319	-0.148887
6.1	-0.864555	-0.662832	-0.386231	-0.165823
6.125	-0.909647	-0.700206	-0.383325	-0.17103
6.15	-0.809487	-0.69287	-0.427869	-0.168576
6.175	-0.817227	-0.737417	-0.392	-0.171114
6.2	-0.84877	-0.710034	-0.37816	-0.176488
6.225	-0.752191	-0.714427	-0.394378	-0.195622
6.25	-0.716327	-0.734741	-0.392825	-0.206544
6.275	-0.734821	-0.705062	-0.427534	-0.217326
6.3	-0.657622	-0.670188	-0.436224	-0.226973
6.325	-0.656088	-0.688839	-0.394697	-0.249358
6.35	-0.685555	-0.66903	-0.371917	-0.26804
6.375	-0.711599	-0.647904	-0.357638	-0.279867
6.4	-0.717701	-0.663199	-0.310867	-0.288556
6.425	-0.757716	-0.669632	-0.296346	-0.283979
6.45	-0.775352	-0.650418	-0.289701	-0.27612
6.475	-0.775225	-0.616944	-0.276624	-0.267699
6.5	-0.718634	-0.622949	-0.255343	-0.257958
6.525	-0.752932	-0.550973	-0.256187	-0.25046
6.55	-0.672239	-0.530325	-0.255844	-0.237775
6.575	-0.613974	-0.545594	-0.252074	-0.224771
6.6	-0.621277	-0.524406	-0.237535	-0.202878
6.625	-0.480541	-0.522453	-0.253908	-0.187701
6.65	-0.348597	-0.527211	-0.224	-0.173089
6.675	-0.405561	-0.53418	-0.248522	-0.194255
6.7	-0.442069	-0.563005	-0.217163	-0.223819
6.725	-0.294455	-0.568728	-0.147554	-0.215444
6.75	-0.471637	-0.646774	-0.227264	-0.265372
6.775	-0.491523	-0.620708	-0.212544	-0.274812
6.8	-0.518945	-0.573039	-0.200333	-0.278436
6.825	-0.69579	-0.608705	-0.262552	-0.313496
6.85	-0.791843	-0.646841	-0.296221	-0.331374
6.875	-0.820846	-0.624313	-0.272587	-0.314623
6.9	-0.746401	-0.620959	-0.28566	-0.302925
6.925	-0.698645	-0.65406	-0.327918	-0.294082
6.95	-0.700048	-0.629778	-0.334142	-0.299843
6.975	-0.680309	-0.612893	-0.327261	-0.312556
7	-0.629862	-0.660024	-0.334648	-0.325048
7.025	-0.624779	-0.681488	-0.292374	-0.334898
7.05	-0.598674	-0.639042	-0.270194	-0.346162
7.075	-0.543064	-0.599976	-0.264912	-0.358928
7.1	-0.563743	-0.627487	-0.276355	-0.370156
7.125	-0.587043	-0.609004	-0.281323	-0.377144
7.15	-0.586494	-0.595225	-0.27825	-0.38697
7.175	-0.598189	-0.602025	-0.30472	-0.394798
7.2	-0.641919	-0.602672	-0.384655	-0.40359
7.225	-0.599208	-0.606064	-0.42072	-0.404603
7.25	-0.664868	-0.626128	-0.457215	-0.407813
7.275	-0.701713	-0.641163	-0.471248	-0.40436
7.3	-0.738329	-0.69913	-0.474223	-0.403983
7.325	-0.856283	-0.677162	-0.45139	-0.404352
7.35	-0.894022	-0.673966	-0.469602	-0.405761
7.375	-0.849134	-0.756158	-0.459928	-0.419893
7.4	-0.808418	-0.771162	-0.435987	-0.432836
7.425	-0.796543	-0.748352	-0.432409	-0.444076
7.45	-0.725764	-0.779552	-0.417179	-0.451158
7.475	-0.661122	-0.759754	-0.399039	-0.466683
7.5	-0.645088	-0.728856	-0.44024	-0.465556
7.525	-0.549562	-0.687386	-0.433346	-0.457463
7.55	-0.477519	-0.65834	-0.435473	-0.45234
7.575	-0.513927	-0.64068	-0.396183	-0.440407
7.6	-0.36704	-0.593141	-0.352063	-0.404788
7.625	-0.28478	-0.54027	-0.32296	-0.379296
7.65	-0.41551	-0.592489	-0.307225	-0.404201
7.675	-0.455621	-0.603515	-0.331645	-0.421241
7.7	-0.378209	-0.564366	-0.295603	-0.39697
7.725	-0.622599	-0.654172	-0.317961	-0.46659
7.75	-0.664535	-0.672979	-0.333256	-0.482486
7.775	-0.651193	-0.680529	-0.330487	-0.486123
7.8	-0.876046	-0.702484	-0.339622	-0.524025
7.825	-0.944848	-0.73148	-0.362395	-0.550406
7.85	-0.948686	-0.748693	-0.330549	-0.533786
7.875	-0.909853	-0.759177	-0.30181	-0.508854
7.9	-0.81345	-0.786771	-0.277827	-0.495685
7.925	-0.758816	-0.795897	-0.316168	-0.482032
7.95	-0.810418	-0.794488	-0.326687	-0.472112
7.975	-0.773891	-0.810218	-0.34467	-0.480693
8	-0.78101	-0.766839	-0.382808	-0.489239
8.025	-0.829756	-0.733995	-0.44331	-0.49609
8.05	-0.824496	-0.731449	-0.468778	-0.513474
8.075	-0.803849	-0.709382	-0.496341	-0.517412
8.1	-0.782284	-0.676093	-0.534997	-0.519932
8.125	-0.708389	-0.661913	-0.539983	-0.537875
8.15	-0.751908	-0.667302	-0.509768	-0.546539
8.175	-0.688606	-0.712533	-0.471373	-0.545711
8.2	-0.613755	-0.725103	-0.501361	-0.554175
8.225	-0.678275	-0.785238	-0.504142	-0.570172
8.25	-0.719343	-0.825887	-0.475217	-0.574782
8.275	-0.647846	-0.825489	-0.482525	-0.596198
8.3	-0.76315	-0.839919	-0.478469	-0.623371
8.325	-0.904079	-0.844317	-0.472995	-0.633676
8.35	-0.881279	-0.847246	-0.467381	-0.628182
8.375	-0.902648	-0.804152	-0.505285	-0.642321
8.4	-0.942602	-0.804271	-0.46094	-0.644779
8.425	-0.890465	-0.766066	-0.451849	-0.646922
8.45	-0.85708	-0.719112	-0.413969	-0.65128
8.475	-0.918084	-0.709997	-0.403264	-0.655871
8.5	-0.862163	-0.702713	-0.393583	-0.644963
8.525	-0.839429	-0.685912	-0.38153	-0.649674
8.55	-0.837491	-0.636576	-0.336753	-0.651501
8.575	-0.670711	-0.580787	-0.322063	-0.614942
8.6	-0.604022	-0.53889	-0.291121	-0.588008
8.625	-0.743331	-0.534872	-0.305274	-0.60043
8.65	-0.728801	-0.518358	-0.3113	-0.605441
8.675	-0.622589	-0.470867	-0.309824	-0.581375
8.7	-0.804682	-0.5122	-0.382499	-0.618773
8.725	-0.719874	-0.490117	-0.377076	-0.603111
8.75	-0.716913	-0.480421	-0.369714	-0.592943
8.775	-0.845885	-0.562166	-0.424293	-0.608654
8.8	-0.931756	-0.626106	-0.434804	-0.623405
8.825	-0.92706	-0.618355	-0.437605	-0.623769
8.85	-0.909879	-0.601955	-0.458555	-0.602645
8.875	-0.931655	-0.629303	-0.435388	-0.589861
8.9	-0.906034	-0.638621	-0.404515	-0.581596
8.925	-0.894481	-0.623058	-0.398724	-0.583144
8.95	-0.86476	-0.666388	-0.420851	-0.586958
8.975	-0.833379	-0.661245	-0.476922	-0.589902
9	-0.819418	-0.65168	-0.519818	-0.597795
9.025	-0.77899	-0.680091	-0.540309	-0.599963
9.05	-0.771508	-0.676049	-0.572963	-0.60013
9.075	-0.725572	-0.688108	-0.596042	-0.602111
9.1	-0.646629	-0.68752	-0.592086	-0.621929
9.125	-0.619804	-0.676361	-0.588613	-0.623755
9.15	-0.590502	-0.6579	-0.582418	-0.62174
9.175	-0.578263	-0.650438	-0.540335	-0.616654
9.2	-0.584062	-0.627341	-0.478473	-0.618914
9.225	-0.529675	-0.610744	-0.468461	-0.621825
9.25	-0.547211	-0.590593	-0.421574	-0.622147
9.275	-0.561866	-0.593303	-0.400357	-0.609055
9.3	-0.517394	-0.583381	-0.365533	-0.58824
9.325	-0.529827	-0.546345	-0.318825	-0.54949
9.35	-0.476505	-0.541011	-0.273872	-0.523276
9.375	-0.519821	-0.522026	-0.258146	-0.509284
9.4	-0.430919	-0.520516	-0.216522	-0.487035
9.425	-0.34541	-0.571127	-0.18696	-0.463806
9.45	-0.35899	-0.571536	-0.168919	-0.452459
9.475	-0.355441	-0.573567	-0.17811	-0.444581
9.5	-0.361077	-0.606436	-0.174431	-0.449784
9.525	-0.417629	-0.600208	-0.18598	-0.452278
9.55	-0.457886	-0.571371	-0.202469	-0.42929
9.575	-0.430451	-0.527134	-0.203501	-0.403345
9.6	-0.535658	-0.49185	-0.204572	-0.423855
9.625	-0.62804	-0.477073	-0.191724	-0.423464
9.65	-0.581759	-0.390581	-0.223058	-0.385457
9.675	-0.727494	-0.392487	-0.227121	-0.434082
9.7	-0.641987	-0.365843	-0.145352	-0.423962
9.725	-0.57456	-0.333799	-0.168678	-0.414037
9.75	-0.546464	-0.337465	-0.17788	-0.44445
9.775	-0.514173	-0.349286	-0.149417	-0.462918
9.8	-0.401659	-0.362517	-0.140696	-0.438196
9.825	-0.287994	-0.353344	-0.161584	-0.435586
9.85	-0.239273	-0.325719	-0.144072	-0.433051
9.875	-0.212491	-0.311457	-0.11073	-0.424629
9.9	-0.152397	-0.290461	-0.166174	-0.428247
9.925	-0.199303	-0.27059	-0.20452	-0.436625
9.95	-0.295801	-0.254123	-0.184273	-0.428315
9.975	-0.37855	-0.271984	-0.199787	-0.424528
10	-0.396046	-0.231105	-0.171695	-0.435132
10.025	-0.477223	-0.196051	-0.139043	-0.425744
10.05	-0.514814	-0.206373	-0.145364	-0.418537
10.075	-0.541091	-0.207009	-0.0826187	-0.419258
10.1	-0.620057	-0.202638	-0.048433	-0.432158
10.125	-0.645222	-0.266279	-0.0500491	-0.435181
10.15	-0.584896	-0.339787	-0.0203556	-0.436453
10.175	-0.58598	-0.333616	-0.0319195	-0.453735
10.2	-0.603817	-0.391711	-0.0457156	-0.450585
10.225	-0.576628	-0.426154	-0.053395	-0.43562
10.25	-0.533943	-0.419344	-0.0961867	-0.439042
10.275	-0.526496	-0.449506	-0.155063	-0.436438
10.3	-0.45355	-0.466241	-0.187002	-0.437965
10.325	-0.378543	-0.491441	-0.226698	-0.436113
10.35	-0.361838	-0.47668	-0.262118	-0.427914
10.375	-0.298976	-0.446138	-0.203232	-0.412634
10.4	-0.287847	-0.454997	-0.197981	-0.401572
10.425	-0.254849	-0.450305	-0.174742	-0.39939
10.45	-0.263714	-0.420005	-0.154476	-0.375843
10.475	-0.272981	-0.406987	-0.123396	-0.34656
10.5	-0.257426	-0.395221	-0.0757075	-0.310485
10.525	-0.115724	-0.324717	-0.0577578	-0.253293
10.55	-0.089933	-0.258543	-0.0434764	-0.226141
10.575	-0.221989	-0.300399	-0.0422631	-0.256838
10.6	-0.277436	-0.33733	-0.0832826	-0.276856
10.625	-0.203974	-0.295319	-0.0876397	-0.251037
10.65	-0.399478	-0.388978	-0.12981	-0.303599
10.675	-0.338975	-0.418879	-0.107407	-0.306894
10.7	-0.36157	-0.425976	-0.116421	-0.312752
10.725	-0.440445	-0.430188	-0.142361	-0.349177
10.75	-0.52806	-0.435384	-0.154476	-0.351739
10.775	-0.443433	-0.428527	-0.127599	-0.34019
10.8	-0.383403	-0.402843	-0.084629	-0.327727
10.825	-0.306262	-0.392809	-0.0669018	-0.312825
10.85	-0.27073	-0.38765	-0.0383583	-0.323932
10.875	-0.310179	-0.341596	-0.010545	-0.345341
10.9	-0.397492	-0.347032	-0.011662	-0.34925
10.925	-0.503596	-0.359522	0.00360263	-0.352664
10.95	-0.60206	-0.361305	-0.00769614	-0.367085
10.975	-0.670152	-0.368291	-0.101433	-0.37425
11	-0.699886	-0.374967	-0.11777	-0.363593
11.025	-0.684548	-0.342986	-0.165965	-0.375702
11.05	-0.737624	-0.32827	-0.231745	-0.370333
11.075	-0.703479	-0.316726	-0.240153	-0.363116
11.1	-0.624583	-0.323159	-0.235278	-0.352604
11.125	-0.586292	-0.308932	-0.255263	-0.34599
11.15	-0.474965	-0.300562	-0.271405	-0.347692
11.175	-0.385445	-0.316446	-0.196785	-0.344568
11.2	-0.361736	-0.29063	-0.173287	-0.338383
11.225	-0.296481	-0.299181	-0.124784	-0.333615
11.25	-0.276876	-0.295872	-0.0901135	-0.335305
11.275	-0.243094	-0.312448	-0.0678026	-0.318087
11.3	-0.221832	-0.286736	-0.0566446	-0.312826
11.325	-0.216088	-0.281796	-0.0363975	-0.310238
11.35	-0.229225	-0.254451	-0.0199441	-0.305216
11.375	-0.28947	-0.23268	-0.0248502	-0.305824
11.4	-0.316584	-0.211475	-0.0743244	-0.299979
11.425	-0.317703	-0.198027	-0.127156	-0.298554
11.45	-0.272283	-0.187057	-0.173537	-0.284571
11.475	-0.22026	-0.151675	-0.228005	-0.286757
11.5	-0.116228	-0.126776	-0.214441	-0.254937
11.525	0.0139487	-0.129604	-0.204921	-0.242427
11.55	-0.036049	-0.176916	-0.222025	-0.273088
11.575	-0.144755	-0.220649	-0.20387	-0.280501
11.6	-0.00463899	-0.216014	-0.149559	-0.252828
11.625	-0.180182	-0.268253	-0.169561	-0.308329
11.65	-0.364534	-0.256511	-0.142544	-0.312135
11.675	-0.299035	-0.278551	-0.137764	-0.308237
11.7	-0.395108	-0.328617	-0.194388	-0.328418
11.725	-0.54126	-0.337728	-0.223241	-0.346662
11.75	-0.429698	-0.331802	-0.224908	-0.348854
11.775	-0.304113	-0.332218	-0.226785	-0.337304
11.8	-0.257657	-0.306835	-0.208232	-0.338723
11.825	-0.124049	-0.293451	-0.195624	-0.347618
11.85	-0.0148819	-0.344404	-0.168033	-0.359434
11.875	0.0313577	-0.329057	-0.164974	-0.362502
11.9	0.0326365	-0.322932	-0.154316	-0.369626
11.925	0.00149474	-0.349422	-0.119127	-0.376339
11.95	-0.0730756	-0.323814	-0.112524	-0.366893
11.975	-0.0755208	-0.310894	-0.122744	-0.351742
12	-0.15721	-0.301432	-0.111966	-0.328622
12.025	-0.219217	-0.276293	-0.0931249	-0.308268
12.05	-0.185464	-0.24371	-0.0780106	-0.292619
12.075	-0.123608	-0.208069	-0.0482205	-0.279632
12.1	-0.0688445	-0.160122	-0.0454156	-0.269131
12.125	0.0363276	-0.126728	-0.0188744	-0.260011
12.15	0.185035	-0.0586495	0.000605532	-0.257707
12.175	0.294703	-0.0305857	0.0206462	-0.254474
12.2	0.432225	0.0109174	0.0215949	-0.24942
12.225	0.473972	0.0236505	0.0130826	-0.263336
12.25	0.487093	0.049769	0.0409805	-0.260829
12.275	0.484032	0.0521597	-0.00262212	-0.253332
12.3	0.483639	0.0682486	-0.0181102	-0.254455
12.325	0.432172	0.0569849	0.0396369	-0.250946
12.35	0.456982	0.0729297	0.0571068	-0.238262
12.375	0.453245	0.0692372	0.0161039	-0.239546
12.4	0.428196	0.0717081	0.0512672	-0.232595
12.425	0.454665	0.0873733	0.0948767	-0.219115
12.45	0.535378	0.137487	0.13162	-0.209008
12.475	0.704392	0.182189	0.184304	-0.172596
12.5	0.878676	0.214737	0.25723	-0.134074
12.525	0.821005	0.256138	0.233435	-0.149035
12.55	0.79138	0.291575	0.263128	-0.153757
12.575	0.902845	0.323703	0.289605	-0.124483
12.6	0.756081	0.314676	0.243162	-0.17252
12.625	0.75819	0.319254	0.226615	-0.173115
12.65	0.827626	0.327078	0.21668	-0.162297
12.675	0.745694	0.288871	0.110003	-0.178345
12.7	0.593889	0.273347	0.056496	-0.193274
12.725	0.583026	0.27338	0.0794614	-0.16378
12.75	0.643906	0.294608	0.0744937	-0.128029
12.775	0.657015	0.274303	0.0814281	-0.101929
12.8	0.643759	0.290256	0.156024	-0.0772339
12.825	0.703556	0.31335	0.221409	-0.0423547
12.85	0.717466	0.31887	0.230794	-0.028621
12.875	0.718768	0.320206	0.270707	-0.00807778
12.9	0.837655	0.328982	0.333395	0.00588771
12.925	1.0125	0.327132	0.324616	0.0106107
12.95	1.15503	0.337515	0.322837	0.0381315
12.975	1.20626	0.371163	0.32733	0.0653045
13	1.25018	0.397958	0.268738	0.0918751
13.025	1.26666	0.410861	0.278531	0.132019
13.05	1.19929	0.423245	0.314239	0.170119
13.075	1.10232	0.449407	0.333297	0.205449
13.1	1.14008	0.442834	0.369951	0.232243
13.125	1.07294	0.437901	0.377705	0.25924
13.15	0.94063	0.418568	0.309938	0.277603
13.175	0.961693	0.38771	0.311144	0.298088
13.2	0.984645	0.351321	0.281962	0.30146
13.225	0.95811	0.32697	0.223226	0.298481
13.25	0.980117	0.307239	0.19326	0.302421
13.275	0.995201	0.32164	0.155898	0.29986
13.3	0.943593	0.298909	0.0913661	0.303026
13.325	0.963403	0.318192	0.161528	0.312881
13.35	0.970104	0.342472	0.171562	0.325177
13.375	0.992531	0.336218	0.157457	0.338306
13.4	1.00028	0.367937	0.218027	0.350949
13.425	1.04303	0.417984	0.225797	0.376968
13.45	1.11748	0.469326	0.234342	0.444589
13.475	1.14858	0.542658	0.307042	0.498591
13.5	1.07375	0.544453	0.341026	0.512612
13.525	1.0006	0.534527	0.355045	0.524286
13.55	1.02589	0.595129	0.403686	0.576734
13.575	0.828332	0.528828	0.376783	0.558368
13.6	0.872883	0.539175	0.396246	0.574273
13.625	0.873064	0.519583	0.403225	0.589668
13.65	0.788975	0.438593	0.370304	0.57919
13.675	0.794306	0.364127	0.337812	0.564918
13.7	0.800813	0.365373	0.289216	0.577798
13.725	0.83209	0.349536	0.272876	0.592288
13.75	0.860009	0.327963	0.233209	0.609761
13.775	0.820836	0.346656	0.247729	0.618168
13.8	0.76636	0.271282	0.283293	0.622239
13.825	0.68759	0.252719	0.280106	0.62688
13.85	0.621215	0.301591	0.227957	0.640308
13.875	0.632394	0.260317	0.232442	0.648218
13.9	0.681689	0.305744	0.199047	0.659419
13.925	0.695961	0.359939	0.184773	0.678933
13.95	0.70435	0.354673	0.192363	0.698439
13.975	0.714343	0.381503	0.160797	0.709
14	0.691277	0.439069	0.14471	0.7141
14.025	0.731282	0.457362	0.120937	0.733276
14.05	0.750505	0.465731	0.117502	0.741597
14.075	0.70223	0.476157	0.139251	0.729811
14.1	0.579907	0.46626	0.101382	0.728491
14.125	0.558223	0.462347	0.107661	0.744384
14.15	0.598628	0.443372	0.113625	0.741896
14.175	0.620835	0.435972	0.10766	0.744393
14.2	0.613584	0.46152	0.11882	0.765456
14.225	0.707233	0.397102	0.140414	0.773232
14.25	0.737119	0.353052	0.114742	0.765666
14.275	0.704998	0.365747	0.0937569	0.776647
14.3	0.755542	0.317354	0.125776	0.77618
14.325	0.763681	0.263031	0.107471	0.778138
14.35	0.682512	0.251336	0.111206	0.78206
14.375	0.581605	0.222966	0.106408	0.772089
14.4	0.573912	0.17763	0.0819445	0.77068
14.425	0.639723	0.208899	0.0969943	0.792453
14.45	0.609074	0.231313	0.121686	0.79233
14.475	0.421757	0.194639	0.112916	0.759295
14.5	0.35348	0.144928	0.110855	0.734452
14.525	0.409093	0.164083	0.142802	0.737323
14.55	0.175876	0.14497	0.0519997	0.673136
14.575	0.179909	0.123935	0.0367887	0.650509
14.6	0.17855	0.139751	0.0700247	0.633654
14.625	0.042106	0.126021	0.0727336	0.605696
14.65	-0.013638	0.115097	0.0646052	0.576169
14.675	0.0217153	0.119841	0.0831889	0.572649
14.7	0.155063	0.128906	0.109456	0.572974
14.725	0.16567	0.167209	0.146663	0.562823
14.75	0.198367	0.178743	0.149359	0.551219
14.775	0.183586	0.159402	0.154376	0.533724
14.8	0.146338	0.152339	0.162361	0.526875
14.825	0.162129	0.150706	0.111317	0.518559
14.85	0.165495	0.16647	0.0410665	0.514933
14.875	0.15368	0.156025	0.0180937	0.52076
14.9	0.171874	0.158802	-0.0211647	0.524817
14.925	0.194203	0.175108	-0.0520441	0.529464
14.95	0.154477	0.160622	-0.108162	0.539499
14.975	0.13026	0.116062	-0.0925046	0.52944
15	0.153283	0.138335	-0.0835549	0.522921
15.025	0.0514358	0.133224	-0.0530015	0.514201
15.05	-0.0138681	0.11352	-0.0482853	0.489578
15.075	-0.0432159	0.0796717	-0.0638138	0.474158
15.1	-0.0668299	0.0696589	-0.0380704	0.458426
15.125	-0.107513	0.0589916	-0.0349032	0.436651
15.15	-0.120135	0.0454075	-0.00839077	0.423735
15.175	-0.0636644	0.0665243	-0.0116085	0.411493
15.2	-0.11257	0.073523	-0.0136346	0.385963
15.225	-0.124665	0.0292052	-0.0488501	0.370576
15.25	-0.141886	0.0166816	-0.0333558	0.356035
15.275	-0.213233	-0.012789	-0.0343836	0.337013
15.3	-0.226984	-0.0871127	-0.00943278	0.31991
15.325	-0.248563	-0.104012	-0.01868	0.322685
15.35	-0.220565	-0.114093	-0.0453673	0.31523
15.375	-0.125342	-0.131992	-0.0391165	0.325953
15.4	0.0162256	-0.128625	-0.0240142	0.347507
15.425	0.115421	-0.0911488	-0.0097747	0.357958
15.45	0.114266	-0.0870574	0.00247191	0.335855
15.475	0.0630818	-0.0818432	-0.0512721	0.312457
15.5	0.16415	-0.0704318	-0.0685056	0.326968
15.525	-0.0641261	-0.0846968	-0.106753	0.257524
15.55	-0.0771639	-0.0845866	-0.150415	0.240961
15.575	-0.0967378	-0.115011	-0.187114	0.223318
15.6	-0.258671	-0.157752	-0.208323	0.173635
15.625	-0.350187	-0.149075	-0.279906	0.153281
15.65	-0.299333	-0.105327	-0.295452	0.163126
15.675	-0.223351	-0.105731	-0.293217	0.171179
15.7	-0.188431	-0.0598555	-0.282764	0.183437
15.725	-0.141931	-0.0342676	-0.2776	0.175688
15.75	-0.177555	-0.0311806	-0.270401	0.159353
15.775	-0.284021	-0.0497613	-0.260364	0.150292
15.8	-0.287279	-0.0876059	-0.291775	0.123469
15.825	-0.254236	-0.137849	-0.293562	0.102193
15.85	-0.241262	-0.20012	-0.277385	0.0790454
15.875	-0.262218	-0.254352	-0.252329	0.0546535
15.9	-0.22274	-0.253475	-0.217709	0.0305361
15.925	-0.198661	-0.269178	-0.192547	0.0118325
15.95	-0.246201	-0.311527	-0.170692	-0.000300483
15.975	-0.224366	-0.360748	-0.188449	-0.0154082
16	-0.244082	-0.363725	-0.184879	-0.0283132
16.025	-0.315446	-0.363471	-0.156894	-0.0417685
16.05	-0.395715	-0.382015	-0.218329	-0.0625187
16.075	-0.427063	-0.392936	-0.259601	-0.0728694
16.1	-0.374842	-0.419812	-0.289359	-0.0790559
16.125	-0.346171	-0.443691	-0.334457	-0.0914138
16.15	-0.342592	-0.455179	-0.347273	-0.0973655
16.175	-0.245086	-0.436066	-0.317232	-0.0990577
16.2	-0.248569	-0.381956	-0.288326	-0.111779
16.225	-0.300208	-0.337905	-0.287157	-0.118108
16.25	-0.300302	-0.339601	-0.256878	-0.126272
16.275	-0.374761	-0.300761	-0.265998	-0.125448
16.3	-0.438129	-0.284694	-0.249717	-0.141192
16.325	-0.463024	-0.311611	-0.227597	-0.135226
16.35	-0.475043	-0.312845	-0.221347	-0.128177
16.375	-0.398872	-0.281433	-0.155261	-0.0988561
16.4	-0.242916	-0.31038	-0.127928	-0.0927091
16.425	-0.322073	-0.333927	-0.133467	-0.117993
16.45	-0.325028	-0.347954	-0.138047	-0.143618
16.475	-0.170888	-0.341813	-0.0970619	-0.139151
16.5	-0.411024	-0.377792	-0.141735	-0.202495
16.525	-0.438199	-0.341504	-0.164311	-0.207883
16.55	-0.437309	-0.315384	-0.182221	-0.224536
16.575	-0.557445	-0.345394	-0.248707	-0.268936
16.6	-0.65692	-0.354696	-0.290233	-0.288348
16.625	-0.576599	-0.360128	-0.247845	-0.279191
16.65	-0.511714	-0.3607	-0.199876	-0.274164
16.675	-0.483946	-0.341818	-0.178341	-0.264805
16.7	-0.41939	-0.330733	-0.0853376	-0.260166
16.725	-0.455749	-0.333998	-0.0910013	-0.265666
16.75	-0.496494	-0.328016	-0.0915931	-0.282825
16.775	-0.48314	-0.351806	-0.099711	-0.285181
16.8	-0.55728	-0.331226	-0.145075	-0.29425
16.825	-0.565803	-0.335879	-0.216015	-0.317316
16.85	-0.532727	-0.354772	-0.23212	-0.32113
16.875	-0.477508	-0.340884	-0.26172	-0.319262
16.9	-0.421065	-0.348366	-0.335563	-0.33498
16.925	-0.365777	-0.380029	-0.371208	-0.343894
16.95	-0.304135	-0.357969	-0.344559	-0.354646
16.975	-0.279088	-0.356772	-0.34192	-0.361332
17	-0.346522	-0.40332	-0.335489	-0.378842
17.025	-0.353506	-0.382602	-0.313933	-0.382994
17.05	-0.370398	-0.366004	-0.317297	-0.384136
17.075	-0.45409	-0.36408	-0.327938	-0.396889
17.1	-0.464009	-0.360443	-0.327465	-0.409271
17.125	-0.413936	-0.344103	-0.325647	-0.410144
17.15	-0.422716	-0.355737	-0.333198	-0.415739
17.175	-0.340148	-0.332096	-0.367337	-0.420838
17.2	-0.298449	-0.335463	-0.358744	-0.420997
17.225	-0.296883	-0.353627	-0.33641	-0.417434
17.25	-0.296371	-0.340973	-0.293668	-0.421324
17.275	-0.310091	-0.355437	-0.277725	-0.414601
17.3	-0.321164	-0.385072	-0.242426	-0.411489
17.325	-0.357429	-0.368491	-0.209982	-0.408435
17.35	-0.23896	-0.31994	-0.186248	-0.375302
17.375	-0.192594	-0.300661	-0.150644	-0.352499
17.4	-0.243192	-0.312972	-0.171018	-0.37331
17.425	-0.278463	-0.299868	-0.206338	-0.383251
17.45	-0.136069	-0.259467	-0.169035	-0.364402
17.475	-0.36448	-0.295632	-0.214573	-0.413966
17.5	-0.369343	-0.281949	-0.207056	-0.430385
17.525	-0.4065	-0.278086	-0.133037	-0.432124
17.55	-0.570766	-0.287974	-0.144268	-0.457131
17.575	-0.689562	-0.293558	-0.131872	-0.480404
17.6	-0.676379	-0.319803	-0.0896526	-0.484471
17.625	-0.608123	-0.309569	-0.120205	-0.465714
17.65	-0.59359	-0.298509	-0.105264	-0.453998
17.675	-0.470096	-0.327452	-0.0841984	-0.447737
17.7	-0.38677	-0.315178	-0.0690881	-0.435772
17.725	-0.358995	-0.301621	-0.0872028	-0.432368
17.75	-0.29926	-0.325534	-0.0708129	-0.43075
17.775	-0.267363	-0.356762	-0.0678469	-0.450567
17.8	-0.36726	-0.384933	-0.0903211	-0.457249
17.825	-0.473267	-0.417847	-0.143096	-0.461563
17.85	-0.538759	-0.42291	-0.176093	-0.462502
17.875	-0.618364	-0.46155	-0.226193	-0.459271
17.9	-0.676163	-0.453815	-0.299895	-0.4665
17.925	-0.672526	-0.433492	-0.325301	-0.45237
17.95	-0.632366	-0.408485	-0.353876	-0.436139
17.975	-0.516549	-0.366799	-0.370645	-0.424783
18	-0.421387	-0.31795	-0.323349	-0.40287
18.025	-0.360938	-0.255398	-0.283124	-0.39602
18.05	-0.252147	-0.228033	-0.234026	-0.401751
18.075	-0.179361	-0.202615	-0.170993	-0.405362
18.1	-0.262658	-0.177349	-0.165314	-0.412556
18.125	-0.313862	-0.19626	-0.172507	-0.414732
18.15	-0.322348	-0.217767	-0.126856	-0.422495
18.175	-0.381163	-0.222709	-0.139138	-0.443063
18.2	-0.493879	-0.255062	-0.160049	-0.438622
18.225	-0.480026	-0.274164	-0.181936	-0.443612
18.25	-0.461989	-0.3091	-0.182681	-0.451832
18.275	-0.542581	-0.335438	-0.197288	-0.443201
18.3	-0.531982	-0.342496	-0.217676	-0.433087
18.325	-0.342185	-0.327769	-0.197259	-0.41283
18.35	-0.282408	-0.31082	-0.199508	-0.388118
18.375	-0.326345	-0.315819	-0.246686	-0.408872
18.4	-0.346729	-0.314124	-0.272002	-0.42881
18.425	-0.25104	-0.286085	-0.297782	-0.414587
18.45	-0.443242	-0.310057	-0.393355	-0.471069
18.475	-0.363193	-0.281328	-0.42849	-0.469066
18.5	-0.382203	-0.254343	-0.473679	-0.470479
18.525	-0.517914	-0.259855	-0.481697	-0.498963
18.55	-0.544862	-0.270994	-0.458257	-0.511425
18.575	-0.529629	-0.272635	-0.437619	-0.50374
18.6	-0.521465	-0.242908	-0.41563	-0.480559
18.625	-0.45237	-0.236535	-0.386022	-0.461068
18.65	-0.46328	-0.250719	-0.336065	-0.457115
18.675	-0.517434	-0.25246	-0.310765	-0.448988
18.7	-0.522846	-0.246042	-0.275188	-0.450555
18.725	-0.556293	-0.266833	-0.284527	-0.461729
18.75	-0.538424	-0.254614	-0.318363	-0.462999
18.775	-0.553539	-0.245641	-0.301907	-0.46076
18.8	-0.552084	-0.23615	-0.286464	-0.471534
18.825	-0.507331	-0.240441	-0.270152	-0.470086
18.85	-0.479838	-0.257394	-0.21024	-0.473519
18.875	-0.481454	-0.252248	-0.21437	-0.471389
18.9	-0.494159	-0.274218	-0.197268	-0.468125
18.925	-0.544459	-0.348684	-0.175125	-0.455274
18.95	-0.606363	-0.348111	-0.161702	-0.447149
18.975	-0.693759	-0.369629	-0.15074	-0.435448
19	-0.749766	-0.411509	-0.168468	-0.431328
19.025	-0.774889	-0.380568	-0.192332	-0.418133
19.05	-0.814112	-0.37861	-0.217447	-0.406983
19.075	-0.867184	-0.401619	-0.224264	-0.415729
19.1	-0.782539	-0.40815	-0.246172	-0.417477
19.125	-0.659355	-0.376308	-0.229336	-0.431321
19.15	-0.638903	-0.372903	-0.220448	-0.441411
19.175	-0.654224	-0.369994	-0.230325	-0.44609
19.2	-0.57798	-0.361641	-0.216483	-0.442494
19.225	-0.702353	-0.35868	-0.169734	-0.448259
19.25	-0.736437	-0.371698	-0.188124	-0.440344
19.275	-0.578215	-0.342307	-0.151337	-0.415186
19.3	-0.42176	-0.260965	-0.108343	-0.378445
19.325	-0.410695	-0.24302	-0.0679873	-0.348146
19.35	-0.475672	-0.243864	-0.123357	-0.354738
19.375	-0.420381	-0.225337	-0.123245	-0.377599
19.4	-0.292941	-0.214835	-0.12507	-0.359709
19.425	-0.424141	-0.270969	-0.143861	-0.405442
19.45	-0.334916	-0.286795	-0.131149	-0.403677
19.475	-0.296842	-0.290833	-0.0854308	-0.393251
19.5	-0.491845	-0.364634	-0.114505	-0.420131
19.525	-0.592831	-0.410709	-0.147227	-0.447647
19.55	-0.550542	-0.397673	-0.148499	-0.437553
19.575	-0.494924	-0.380993	-0.129886	-0.416728
19.6	-0.536306	-0.359356	-0.130461	-0.403894
19.625	-0.497931	-0.324551	-0.121179	-0.392881
19.65	-0.515355	-0.269065	-0.113472	-0.40305
19.675	-0.529376	-0.207213	-0.139	-0.402441
19.7	-0.54944	-0.208589	-0.135699	-0.409853
19.725	-0.545549	-0.226101	-0.132591	-0.405573
19.75	-0.520053	-0.226784	-0.149629	-0.399388
19.775	-0.436612	-0.269755	-0.126048	-0.40157
19.8	-0.432891	-0.308717	-0.144923	-0.408738
19.825	-0.408572	-0.315942	-0.137391	-0.415781
19.85	-0.36307	-0.361739	-0.157234	-0.411232
19.875	-0.298734	-0.422883	-0.153856	-0.406507
19.9	-0.267225	-0.415118	-0.153106	-0.40881
19.925	-0.27961	-0.40118	-0.172524	-0.403358
19.95	-0.245334	-0.361872	-0.168763	-0.402179
19.975	-0.32109	-0.335162	-0.145305	-0.395951
20	-0.339837	-0.329232	-0.220889	-0.382246
20.025	-0.36885	-0.321461	-0.222248	-0.375058
20.05	-0.441787	-0.33198	-0.192759	-0.3789
20.075	-0.509181	-0.295655	-0.221891	-0.375384
20.1	-0.60761	-0.30555	-0.200923	-0.375014
20.125	-0.677707	-0.321096	-0.184293	-0.382766
20.15	-0.676722	-0.347564	-0.20874	-0.374437
20.175	-0.646897	-0.356332	-0.184431	-0.375009
20.2	-0.658259	-0.360443	-0.170418	-0.377168
20.225	-0.576133	-0.326006	-0.177338	-0.370652
20.25	-0.462318	-0.279814	-0.157695	-0.362325
20.275	-0.271736	-0.228642	-0.136431	-0.338963
20.3	-0.108492	-0.182532	-0.124063	-0.315593
20.325	-0.111328	-0.189626	-0.162697	-0.327747
20.35	-0.122918	-0.203111	-0.151733	-0.346441
20.375	0.0530739	-0.155356	-0.1055	-0.319013
20.4	-0.0424367	-0.231537	-0.142939	-0.367327
20.425	-0.055834	-0.25637	-0.126742	-0.359798
20.45	-0.0160889	-0.298904	-0.153416	-0.364515
20.475	-0.109475	-0.313064	-0.179313	-0.382999
20.5	-0.175466	-0.313017	-0.262402	-0.399836
20.525	-0.151715	-0.333804	-0.310934	-0.384648
20.55	-0.0503103	-0.306986	-0.294452	-0.363555
20.575	-0.145363	-0.258004	-0.307188	-0.342417
20.6	-0.185838	-0.281642	-0.35112	-0.336531
20.625	-0.194049	-0.278894	-0.328277	-0.342754
20.65	-0.346164	-0.242789	-0.316068	-0.339725
20.675	-0.366256	-0.249277	-0.32863	-0.342146
20.7	-0.315059	-0.252111	-0.276405	-0.351394
20.725	-0.371119	-0.236838	-0.228189	-0.346708
20.75	-0.301665	-0.232357	-0.23503	-0.349154
20.775	-0.248271	-0.202449	-0.220993	-0.372246
20.8	-0.219184	-0.172987	-0.230987	-0.378134
20.825	-0.131692	-0.191722	-0.267242	-0.380209
20.85	-0.141807	-0.174285	-0.282646	-0.390621
20.875	-0.194065	-0.159923	-0.276049	-0.387744
20.9	-0.205741	-0.171029	-0.295818	-0.382216
20.925	-0.238765	-0.16476	-0.314403	-0.381137
20.95	-0.302058	-0.159565	-0.311995	-0.375721
20.975	-0.340954	-0.174112	-0.309502	-0.375314
21	-0.379353	-0.17839	-0.293405	-0.361445
21.025	-0.493636	-0.190689	-0.291698	-0.340024
21.05	-0.559238	-0.19687	-0.248736	-0.324867
21.075	-0.582913	-0.177425	-0.20808	-0.317371
21.1	-0.578836	-0.225069	-0.168403	-0.299471
21.125	-0.5316	-0.197528	-0.101129	-0.290008
21.15	-0.488812	-0.187251	-0.0818816	-0.28763
21.175	-0.351281	-0.180104	-0.0525716	-0.277315
21.2	-0.279886	-0.151851	-0.0427146	-0.276527
21.225	-0.152438	-0.149801	-0.0671388	-0.268365
21.25	0.00503983	-0.13829	-0.0795064	-0.260647
21.275	0.168717	-0.0885118	-0.0701147	-0.243798
21.3	0.145169	-0.12952	-0.144588	-0.270069
21.325	0.0664534	-0.160915	-0.194032	-0.289351
21.35	0.167804	-0.133376	-0.151529	-0.261829
21.375	-0.113367	-0.181893	-0.183098	-0.295998
21.4	-0.214668	-0.204242	-0.149202	-0.287489
21.425	-0.212016	-0.208145	-0.122495	-0.279797
21.45	-0.352112	-0.206161	-0.142741	-0.313371
21.475	-0.458385	-0.27372	-0.177051	-0.342465
21.5	-0.501183	-0.282816	-0.17534	-0.342839
21.525	-0.435604	-0.267688	-0.166525	-0.336136
21.55	-0.443487	-0.26106	-0.249292	-0.347223
21.575	-0.374341	-0.260295	-0.305533	-0.352832
21.6	-0.298697	-0.264912	-0.315101	-0.356546
21.625	-0.304948	-0.259584	-0.327282	-0.360491
21.65	-0.255967	-0.209742	-0.30293	-0.345591
21.675	-0.267048	-0.166824	-0.23571	-0.328796
21.7	-0.305544	-0.144941	-0.211745	-0.314934
21.725	-0.275231	-0.121289	-0.192348	-0.302187
21.75	-0.290968	-0.105688	-0.140062	-0.29073
21.775	-0.298666	-0.108854	-0.0997942	-0.278058
21.8	-0.289458	-0.135494	-0.0886608	-0.267277
21.825	-0.303667	-0.152158	-0.0688372	-0.274625
21.85	-0.27785	-0.156345	-0.045915	-0.273812
21.875	-0.231565	-0.182525	-0.0550303	-0.271732
21.9	-0.218997	-0.196708	-0.020339	-0.277357
21.925	-0.128577	-0.197227	-0.0173723	-0.27686
21.95	-0.143756	-0.1597	-0.0293555	-0.27239
21.975	-0.147801	-0.137355	-0.0159648	-0.268453
22	-0.100726	-0.113535	-0.00582716	-0.259356
22.025	-0.0293276	-0.0709996	-0.0357424	-0.230952
22.05	0.0424108	-0.00923104	-0.00943021	-0.219557
22.075	0.174057	0.000421752	0.0381828	-0.202497
22.1	0.302552	0.013404	0.073155	-0.190775
22.125	0.32402	0.0835074	0.138471	-0.1794
22.15	0.366915	0.120973	0.194377	-0.166596
22.175	0.405719	0.114901	0.246114	-0.159384
22.2	0.480568	0.170561	0.253157	-0.143863
22.225	0.596143	0.242415	0.302495	-0.128136
22.25	0.687146	0.247148	0.384199	-0.112679
22.275	0.639747	0.235483	0.384844	-0.139771
22.3	0.584706	0.288789	0.346534	-0.148318
22.325	0.700434	0.300178	0.375736	-0.120413
22.35	0.539053	0.244695	0.299384	-0.164312
22.375	0.627489	0.281908	0.306463	-0.154631
22.4	0.709243	0.284559	0.281603	-0.150713
22.425	0.565644	0.252722	0.206317	-0.179927
22.45	0.499816	0.229413	0.178111	-0.195553
22.475	0.539101	0.272362	0.168816	-0.177816
22.5	0.61	0.288982	0.174757	-0.168705
22.525	0.632117	0.264103	0.187321	-0.164961
22.55	0.682708	0.279463	0.219951	-0.1619
22.575	0.708668	0.285943	0.230618	-0.16449
22.6	0.673794	0.286293	0.251032	-0.17112
22.625	0.625885	0.32244	0.252265	-0.161864
22.65	0.714097	0.370479	0.302494	-0.162717
22.675	0.699805	0.380869	0.335508	-0.173379
22.7	0.617483	0.390569	0.320248	-0.165739
22.725	0.604144	0.413921	0.338359	-0.163492
22.75	0.526586	0.437197	0.351203	-0.174708
22.775	0.514407	0.459738	0.334688	-0.174756
22.8	0.563028	0.496564	0.34027	-0.16031
22.825	0.56736	0.507181	0.335796	-0.159194
22.85	0.674485	0.470259	0.323264	-0.139165
22.875	0.710073	0.526651	0.301295	-0.118965
22.9	0.778291	0.511464	0.327411	-0.115374
22.925	0.853291	0.47584	0.317194	-0.109901
22.95	0.953783	0.492299	0.318731	-0.104523
22.975	0.931586	0.480635	0.350399	-0.100065
23	0.973052	0.470399	0.375926	-0.0992731
23.025	1.03474	0.468649	0.367262	-0.105845
23.05	1.02724	0.467667	0.363061	-0.118631
23.075	1.03925	0.474573	0.409877	-0.126608
23.1	1.08494	0.477804	0.386979	-0.135014
23.125	1.06155	0.506356	0.3551	-0.139459
23.15	1.07611	0.529614	0.403031	-0.141492
23.175	1.05548	0.544643	0.406623	-0.143721
23.2	1.12921	0.601913	0.398893	-0.131113
23.225	1.14804	0.608917	0.412951	-0.111759
23.25	1.03416	0.621235	0.369476	-0.136355
23.275	0.959672	0.636422	0.287354	-0.157419
23.3	1.0283	0.669972	0.235054	-0.137656
23.325	0.836954	0.640128	0.197535	-0.177062
23.35	0.836332	0.655898	0.166316	-0.1709
23.375	0.860234	0.645055	0.150472	-0.181706
23.4	0.724894	0.583092	0.141157	-0.200385
23.425	0.680484	0.522288	0.159623	-0.22002
23.45	0.720503	0.488474	0.217553	-0.225997
23.475	0.794293	0.48681	0.269828	-0.201624
23.5	0.889813	0.453031	0.335051	-0.17714
23.525	0.860277	0.463576	0.361399	-0.168122
23.55	0.88423	0.471884	0.347138	-0.165443
23.575	0.909213	0.476568	0.287758	-0.163937
23.6	0.867932	0.495543	0.260371	-0.152213
23.625	0.834838	0.535054	0.26413	-0.14027
23.65	0.791297	0.575675	0.21771	-0.134007
23.675	0.778165	0.594935	0.170039	-0.129467
23.7	0.689703	0.604356	0.19308	-0.126381
23.725	0.635549	0.610457	0.187892	-0.118562
23.75	0.752039	0.568641	0.18207	-0.110487
23.775	0.717358	0.547045	0.191495	-0.0897669
23.8	0.626097	0.530038	0.186067	-0.0754142
23.825	0.585542	0.53125	0.178584	-0.0750539
23.85	0.59004	0.511956	0.136118	-0.0899739
23.875	0.485465	0.482806	0.114939	-0.0901831
23.9	0.43455	0.436498	0.105481	-0.0912353
23.925	0.408893	0.430094	0.0698023	-0.0911083
23.95	0.376406	0.415233	0.0309928	-0.114668
23.975	0.436772	0.399424	0.0178548	-0.122601
24	0.458935	0.415762	-0.0229516	-0.119156
24.025	0.552652	0.392572	-0.0185033	-0.115127
24.05	0.626568	0.352376	0.023365	-0.0990719
24.075	0.631548	0.367752	0.0112948	-0.0804483
24.1	0.587262	0.379601	-0.0190412	-0.0753745
24.125	0.600547	0.373897	0.064699	-0.0717426
24.15	0.608572	0.37998	0.0702071	-0.0669258
24.175	0.671135	0.385825	0.120503	-0.0411609
24.2	0.683612	0.372845	0.19282	-0.0225096
24.225	0.64645	0.352302	0.165853	-0.052478
24.25	0.634635	0.352776	0.110686	-0.0732755
24.275	0.771367	0.402779	0.10373	-0.0638564
24.3	0.64553	0.323813	0.073437	-0.10722
24.325	0.708505	0.316054	0.061665	-0.112531
24.35	0.678816	0.321865	0.0605318	-0.121131
24.375	0.538606	0.297787	0.0140875	-0.150209
24.4	0.397588	0.296424	-0.0141762	-0.171679
24.425	0.426888	0.311173	0.0116367	-0.164733
24.45	0.414534	0.319115	0.0318788	-0.159049
24.475	0.445122	0.334806	0.0878019	-0.15296
24.5	0.512999	0.293818	0.0963625	-0.147406
24.525	0.468117	0.283246	0.0778158	-0.147111
24.55	0.439536	0.337791	0.0971544	-0.141632
24.575	0.456683	0.312545	0.118732	-0.136544
24.6	0.411793	0.328553	0.130715	-0.135792
24.625	0.334285	0.356145	0.130046	-0.124355
24.65	0.389927	0.287453	0.109684	-0.11359
24.675	0.353628	0.28216	0.109513	-0.103892
24.7	0.221271	0.243021	0.0641575	-0.0957495
24.725	0.228999	0.225091	0.0612321	-0.0876216
24.75	0.167683	0.209527	0.0664482	-0.0760249
24.775	0.0818537	0.156387	0.0635727	-0.074508
24.8	0.0789426	0.117042	0.0324417	-0.0704306
24.825	0.0822319	0.112628	0.0277133	-0.062082
24.85	0.0584299	0.0986087	0.0528479	-0.070992
24.875	-0.0165312	0.0804146	0.0441559	-0.0788507
24.9	0.0210628	0.093548	0.0238354	-0.0858717
24.925	0.0594385	0.0731019	0.0333132	-0.0876292
24.95	0.0952069	0.0248412	-0.0014891	-0.102107
24.975	0.066735	0.0255327	-0.0813542	-0.120612
25	0.0941613	-0.0192505	-0.0729686	-0.125261
25.025	0.0995732	-0.0194509	-0.125675	-0.133805
25.05	0.0492141	0.00529525	-0.149874	-0.14605
25.075	-0.0296586	-0.0176634	-0.180906	-0.158199
25.1	0.0223536	-0.00380647	-0.150179	-0.143198
25.125	0.109056	-0.00466478	-0.147858	-0.122076
25.15	0.212309	0.0433785	-0.123215	-0.0773158
25.175	0.339666	0.0602238	-0.100954	-0.0424835
25.2	0.4094	0.041199	-0.0908253	-0.0462884
25.225	0.358401	0.0464592	-0.0703849	-0.0502019
25.25	0.501982	0.05478	-0.025965	-0.0167119
25.275	0.425158	-0.00571767	-0.0307373	-0.0619629
25.3	0.435285	0.00708746	0.0124378	-0.0647156
25.325	0.363299	0.00432165	0.0154271	-0.0693461
25.35	0.177327	-0.0544327	0.0365386	-0.111774
25.375	0.0178394	-0.0992108	0.0448363	-0.137516
25.4	0.0373203	-0.115306	0.0229593	-0.131646
25.425	-0.074016	-0.0926455	0.0252765	-0.123932
25.45	-0.130728	-0.0855508	0.00646007	-0.134385
25.475	-0.218627	-0.076856	-0.0417454	-0.131872
25.5	-0.281869	-0.0459634	-0.0662916	-0.126722
25.525	-0.338469	-0.0133063	-0.0844222	-0.126683
25.55	-0.312739	-0.0259829	-0.12956	-0.117678
25.575	-0.324529	-0.0272309	-0.144745	-0.111259
25.6	-0.324412	0.00424375	-0.147109	-0.110451
25.625	-0.327974	-0.0222905	-0.166432	-0.0975354
25.65	-0.301333	-0.117963	-0.132501	-0.0895011
25.675	-0.311	-0.138102	-0.155131	-0.079817
25.7	-0.305326	-0.175651	-0.137701	-0.0787157
25.725	-0.327387	-0.214663	-0.123052	-0.0822662
25.75	-0.396708	-0.218269	-0.119769	-0.0871449
25.775	-0.390238	-0.201608	-0.0785282	-0.0889491
25.8	-0.401407	-0.236481	-0.104925	-0.0886431
25.825	-0.371907	-0.261057	-0.113967	-0.0873337
25.85	-0.366353	-0.265057	-0.141684	-0.0872404
25.875	-0.346923	-0.256481	-0.166808	-0.10286
25.9	-0.337014	-0.259227	-0.189956	-0.104723
25.925	-0.286064	-0.286095	-0.224122	-0.102103
25.95	-0.306997	-0.277032	-0.256626	-0.099604
25.975	-0.31368	-0.271604	-0.252492	-0.102077
26	-0.292257	-0.276702	-0.26858	-0.0963022
26.025	-0.364201	-0.254086	-0.248469	-0.0977327
26.05	-0.455029	-0.220273	-0.229188	-0.100478
26.075	-0.379138	-0.220272	-0.202808	-0.0856483
26.1	-0.240284	-0.203438	-0.19978	-0.0752333
26.125	-0.17133	-0.162572	-0.14545	-0.0510735
26.15	-0.0421755	-0.142609	-0.108159	-0.0321845
26.175	0.0152575	-0.155976	-0.110457	-0.0553242
26.2	-0.0110826	-0.165447	-0.101433	-0.0656154
26.225	0.0614366	-0.154037	-0.0939275	-0.041426
26.25	-0.0400376	-0.199216	-0.128335	-0.0929792
26.275	-0.0202584	-0.231249	-0.0847061	-0.11254
26.3	-0.167238	-0.262011	-0.114533	-0.129792
26.325	-0.379252	-0.317993	-0.179129	-0.177853
26.35	-0.45137	-0.345317	-0.183804	-0.214461
26.375	-0.543572	-0.351388	-0.181726	-0.217966
26.4	-0.615259	-0.378272	-0.230945	-0.217001
26.425	-0.581219	-0.356727	-0.222064	-0.215904
26.45	-0.608747	-0.344219	-0.220655	-0.215857
26.475	-0.70857	-0.357657	-0.260674	-0.211436
26.5	-0.700358	-0.287297	-0.255783	-0.19639
26.525	-0.693183	-0.274494	-0.255957	-0.188752
26.55	-0.736521	-0.298713	-0.212342	-0.178741
26.575	-0.66431	-0.273382	-0.199664	-0.165427
26.6	-0.618353	-0.269193	-0.175653	-0.158466
26.625	-0.584127	-0.257435	-0.181973	-0.149143
26.65	-0.507399	-0.233281	-0.160713	-0.135063
26.675	-0.44646	-0.20838	-0.12103	-0.130768
26.7	-0.36276	-0.202268	-0.15424	-0.133485
26.725	-0.273102	-0.187938	-0.194188	-0.13738
26.75	-0.277195	-0.171059	-0.193803	-0.158728
26.775	-0.290614	-0.19652	-0.215984	-0.172534
26.8	-0.289335	-0.219239	-0.231766	-0.175975
26.825	-0.286573	-0.278731	-0.243114	-0.188661
26.85	-0.326554	-0.307403	-0.221473	-0.195515
26.875	-0.393503	-0.33954	-0.228874	-0.190229
26.9	-0.407329	-0.359219	-0.243683	-0.186577
26.925	-0.454288	-0.36463	-0.238463	-0.164661
26.95	-0.533979	-0.389562	-0.187585	-0.139876
26.975	-0.502921	-0.351339	-0.160455	-0.125716
27	-0.481974	-0.314344	-0.141446	-0.11371
27.025	-0.521924	-0.277921	-0.142648	-0.104218
27.05	-0.472837	-0.262265	-0.0916521	-0.101933
27.075	-0.468949	-0.223411	-0.0713142	-0.0920549
27.1	-0.308454	-0.179912	-0.0518801	-0.055953
27.125	-0.305613	-0.18503	-0.0626092	-0.0464753
27.15	-0.354882	-0.184794	-0.0749535	-0.0666638
27.175	-0.441391	-0.192911	-0.108443	-0.0702507
27.2	-0.408288	-0.190371	-0.131153	-0.0566077
27.225	-0.648115	-0.240062	-0.182026	-0.106938
27.25	-0.688214	-0.227698	-0.217011	-0.110474
27.275	-0.703836	-0.228298	-0.265546	-0.117252
27.3	-0.782416	-0.253858	-0.332261	-0.154125
27.325	-0.861898	-0.260817	-0.311022	-0.162446
27.35	-0.82745	-0.223267	-0.257576	-0.155708
27.375	-0.706444	-0.246388	-0.215061	-0.148688
27.4	-0.697767	-0.27033	-0.17451	-0.137758
27.425	-0.659336	-0.244564	-0.133912	-0.134517
27.45	-0.565632	-0.261686	-0.12794	-0.136657
27.475	-0.589988	-0.273146	-0.104455	-0.136707
27.5	-0.611405	-0.267254	-0.0852783	-0.140953
27.525	-0.576776	-0.297351	-0.11733	-0.153301
27.55	-0.606898	-0.343283	-0.164817	-0.165154
27.575	-0.600606	-0.354658	-0.179064	-0.181528
27.6	-0.571858	-0.32735	-0.242921	-0.177843
27.625	-0.548549	-0.308059	-0.252802	-0.170386
27.65	-0.580441	-0.310674	-0.300954	-0.165954
27.675	-0.543478	-0.329499	-0.279845	-0.156009
27.7	-0.418112	-0.304832	-0.282157	-0.143382
27.725	-0.39157	-0.302699	-0.297272	-0.138075
27.75	-0.35441	-0.264929	-0.270912	-0.12768
27.775	-0.309264	-0.257542	-0.2668	-0.113947
27.8	-0.337329	-0.314441	-0.287568	-0.109681
27.825	-0.38836	-0.331849	-0.281793	-0.0940382
27.85	-0.327036	-0.347107	-0.223919	-0.0888866
27.875	-0.380432	-0.352647	-0.21878	-0.0766371
27.9	-0.451243	-0.37191	-0.203714	-0.0745312
27.925	-0.45988	-0.374597	-0.176107	-0.0793577
27.95	-0.474096	-0.407162	-0.156254	-0.0859131
27.975	-0.448916	-0.421565	-0.128987	-0.0899102
28	-0.347296	-0.389656	-0.121261	-0.100716
28.025	-0.290112	-0.36748	-0.1523	-0.108933
28.05	-0.273741	-0.352434	-0.138771	-0.113129
28.075	-0.180811	-0.330045	-0.11334	-0.0943578
28.1	-0.053104	-0.288124	-0.13309	-0.0732683
28.125	-0.058596	-0.254982	-0.166185	-0.0898003
28.15	-0.183774	-0.253451	-0.168911	-0.095299
28.175	-0.0840829	-0.20361	-0.190549	-0.0603568
28.2	-0.203727	-0.219223	-0.228321	-0.104304
28.225	-0.225556	-0.229214	-0.224939	-0.106243
28.25	-0.231108	-0.21144	-0.238871	-0.108198
28.275	-0.279942	-0.159473	-0.267167	-0.14663
28.3	-0.408979	-0.151815	-0.308257	-0.174316
28.325	-0.453415	-0.165963	-0.304785	-0.160304
28.35	-0.428418	-0.137639	-0.286586	-0.148832
28.375	-0.415595	-0.111286	-0.244602	-0.126629
28.4	-0.447676	-0.113592	-0.227977	-0.107432
28.425	-0.470062	-0.156764	-0.195264	-0.102204
28.45	-0.459473	-0.168667	-0.161506	-0.091224
28.475	-0.480619	-0.215262	-0.155976	-0.0771594
28.5	-0.50357	-0.272323	-0.159931	-0.0693302
28.525	-0.453333	-0.277627	-0.151753	-0.0580046
28.55	-0.443106	-0.253778	-0.2028	-0.066612
28.575	-0.467963	-0.23497	-0.224515	-0.0647837
28.6	-0.418549	-0.26919	-0.213837	-0.0761446
28.625	-0.419785	-0.223142	-0.218525	-0.0823359
28.65	-0.39881	-0.196615	-0.211282	-0.0701146
28.675	-0.461334	-0.185594	-0.172027	-0.0680053
28.7	-0.420813	-0.180867	-0.118672	-0.0726517
28.725	-0.44493	-0.185661	-0.114357	-0.0749224
28.75	-0.481919	-0.211991	-0.0733693	-0.0717455
28.775	-0.448379	-0.208088	-0.0235811	-0.0654871
28.8	-0.415017	-0.21572	-0.0423036	-0.0614814
28.825	-0.322156	-0.226708	-0.0543765	-0.0488312
28.85	-0.371307	-0.239004	-0.0542326	-0.0451912
28.875	-0.317387	-0.269989	-0.11063	-0.0436843
28.9	-0.289126	-0.286893	-0.124388	-0.0549962
28.925	-0.286927	-0.275654	-0.136601	-0.0452564
28.95	-0.200257	-0.256978	-0.152781	-0.0477768
28.975	-0.199707	-0.262451	-0.116864	-0.0522502
29	-0.22214	-0.241231	-0.110637	-0.0559761
29.025	-0.140842	-0.219755	-0.0803288	-0.055267
29.05	-0.0599889	-0.180151	-0.04393	-0.0302195
29.075	0.0585415	-0.156694	-0.0129099	-0.0165132
29.1	0.0483957	-0.147191	0.0175741	-0.0330673
29.125	0.0324023	-0.159886	0.0276373	-0.038452
29.15	0.115015	-0.125119	0.0818038	-0.00353229
29.175	-0.121106	-0.169146	0.0215785	-0.0560141
29.2	-0.218624	-0.172592	0.0269194	-0.0498892
29.225	-0.217808	-0.156399	0.0377942	-0.0335667
29.25	-0.357307	-0.149124	0.0201291	-0.0714463
29.275	-0.457807	-0.192436	0.000672374	-0.0998521
29.3	-0.443434	-0.165093	-0.0383675	-0.0902533
29.325	-0.493831	-0.133144	-0.0996684	-0.087865
29.35	-0.507886	-0.139854	-0.136303	-0.0834435
29.375	-0.416828	-0.139526	-0.199673	-0.0729601
29.4	-0.391301	-0.159379	-0.2315	-0.0711483
29.425	-0.342927	-0.181553	-0.20536	-0.0710564
29.45	-0.30963	-0.161027	-0.233832	-0.0754108
29.475	-0.427007	-0.183844	-0.193172	-0.0821376
29.5	-0.439519	-0.219718	-0.178231	-0.087055
29.525	-0.460454	-0.206947	-0.160378	-0.095425
29.55	-0.481721	-0.196521	-0.124429	-0.114653
29.575	-0.513982	-0.253568	-0.128049	-0.114369
29.6	-0.529414	-0.222691	-0.156356	-0.11538
29.625	-0.550138	-0.174726	-0.160308	-0.114878
29.65	-0.534853	-0.181494	-0.158223	-0.110994
29.675	-0.498976	-0.213419	-0.165982	-0.0939291
29.7	-0.46653	-0.209528	-0.140249	-0.0807012
29.725	-0.341776	-0.196112	-0.0831599	-0.0709308
29.75	-0.251234	-0.234819	-0.0860651	-0.0520109
29.775	-0.22346	-0.248001	-0.0676224	-0.0436222
29.8	-0.168129	-0.261147	-0.0342156	-0.0446793
29.825	-0.141262	-0.26427	-0.0150747	-0.0412455
29.85	-0.163305	-0.282444	-0.0416143	-0.0308923
29.875	-0.115038	-0.264279	-0.0473976	-0.018405
29.9	-0.130619	-0.200302	-0.0721938	-0.00581317
29.925	-0.166333	-0.154675	-0.0932868	0.00387865
29.95	-0.139159	-0.0867703	-0.110273	0.0105163
29.975	-0.218846	-0.0128558	-0.108488	0.0150175
30	-0.140849	0.00556437	-0.0912459	0.0269372
30.025	-0.045017	0.0606664	-0.101145	0.0643247
30.05	0.00609478	0.067584	-0.081045	0.0768917
30.075	-0.0756713	0.0417267	-0.0872283	0.0522892
30.1	-0.15409	0.0142204	-0.145787	0.0296313
30.125	-0.0921503	0.0390635	-0.153006	0.0550647
30.15	-0.275965	-0.0516026	-0.192341	-0.000748805
30.175	-0.262455	-0.060187	-0.211392	-0.0130233
30.2	-0.306899	-0.0633781	-0.210396	-0.0185674
30.225	-0.478053	-0.0693708	-0.244045	-0.067095
30.25	-0.522055	-0.104211	-0.24025	-0.0988035
30.275	-0.457424	-0.085252	-0.242501	-0.0907757
30.3	-0.407112	-0.0856129	-0.185582	-0.0921285
30.325	-0.35619	-0.155858	-0.1673	-0.0969169
30.35	-0.322138	-0.149608	-0.164983	-0.0838602
30.375	-0.272516	-0.125753	-0.12481	-0.0864725
30.4	-0.276064	-0.154454	-0.139997	-0.082679
30.425	-0.194272	-0.143264	-0.1344	-0.0652721
30.45	-0.128091	-0.112187	-0.092234	-0.0593626
30.475	-0.0909632	-0.0959569	-0.0659671	-0.0588948
30.5	-0.157229	-0.105886	-0.0116855	-0.0421122
30.525	-0.167776	-0.0723431	-0.00376373	-0.0352549
30.55	-0.112885	-0.0605137	0.0227573	-0.0309488
30.575	-0.148535	-0.0817838	0.0105434	-0.0389706
30.6	-0.208729	-0.0619392	0.0123805	-0.0500766
30.625	-0.119459	-0.0874983	0.00966153	-0.0458811
30.65	-0.169992	-0.0837633	0.00746888	-0.041062
30.675	-0.224656	-0.052609	-0.00123205	-0.0470677
30.7	-0.226281	-0.0406215	0.011489	-0.0443334
30.725	-0.201025	-0.0257114	0.00897511	-0.0339651
30.75	-0.169866	0.0107576	0.0160318	-0.0379171
30.775	-0.143373	-0.0181554	0.0527357	-0.0277508
30.8	-0.183394	-0.0144277	0.0687593	-0.00767494
30.825	-0.130929	-0.0208093	0.0435293	-0.000209436
30.85	-0.137344	-0.0244727	0.0184126	-0.00226483
30.875	-0.158681	-0.0323054	0.0105651	-0.0131708
30.9	-0.1639	-0.0343928	-0.0084302	-0.0141884
30.925	-0.178701	-0.0458034	-0.0400498	-0.0212598
30.95	-0.225312	-0.0289503	-0.0406169	-0.0228128
30.975	-0.26039	-0.0416407	-0.0994932	-0.0183122
31	-0.168585	-0.0402018	-0.0801808	0.0173646
31.025	-0.0803603	-0.015307	-0.0466345	0.0353289
31.05	-0.162113	-0.0424283	-0.0843755	0.011022
31.075	-0.233871	-0.104283	-0.104277	-0.0131229
31.1	-0.134185	-0.0817756	-0.0681181	0.00166365
31.125	-0.322237	-0.129705	-0.153659	-0.0589486
31.15	-0.344774	-0.147865	-0.178761	-0.0731989
31.175	-0.38119	-0.11348	-0.181469	-0.0814948
31.2	-0.479154	-0.124109	-0.148828	-0.128303
31.225	-0.552132	-0.146639	-0.193851	-0.153723
31.25	-0.461248	-0.121976	-0.214565	-0.145586
31.275	-0.382691	-0.130133	-0.179709	-0.116871
31.3	-0.319076	-0.133748	-0.108512	-0.0963492
31.325	-0.287393	-0.1236	-0.0881781	-0.0809974
31.35	-0.218606	-0.114402	-0.0486977	-0.0751309
31.375	-0.228042	-0.134846	-0.0192163	-0.0713158
31.4	-0.192768	-0.146056	-0.02572	-0.0666556
31.425	-0.221712	-0.136925	-0.0678802	-0.0627146
31.45	-0.245024	-0.115146	-0.0694701	-0.0651385
31.475	-0.227835	-0.165003	-0.0709318	-0.0588972
31.5	-0.161413	-0.165031	-0.13113	-0.0574575
31.525	-0.144424	-0.143274	-0.182679	-0.058588
31.55	-0.0876169	-0.140822	-0.156843	-0.0466129
31.575	-0.0665176	-0.16292	-0.155423	-0.0475096
31.6	-0.125392	-0.121818	-0.160252	-0.0567341
31.625	-0.057399	-0.112472	-0.122593	-0.0525568
31.65	-0.122839	-0.101556	-0.109546	-0.0452609
31.675	-0.132131	-0.0624258	-0.0956775	-0.0488867
31.7	-0.17791	-0.0259598	-0.0880763	-0.043459
31.725	-0.202608	-0.0137433	-0.0417248	-0.0520729
31.75	-0.268671	-0.064344	-0.032464	-0.0516588
31.775	-0.287403	-0.0908807	-0.0159892	-0.0458709
31.8	-0.227681	-0.0791325	0.0355339	-0.0446391
31.825	-0.252572	-0.101755	0.0729676	-0.0419929
31.85	-0.250936	-0.104287	0.105446	-0.0426085
31.875	-0.17323	-0.0374013	0.105495	-0.0446124
31.9	-0.133726	-0.0330181	0.106772	-0.0458736
31.925	-0.0593134	-0.018949	0.158352	-0.0362901
31.95	0.0958218	0.0764819	0.172001	-0.0184881
31.975	0.303727	0.16902	0.179142	0.0153942
32	0.374689	0.219343	0.203968	0.0415688
32.025	0.348291	0.244987	0.204824	0.0300759
32.05	0.412117	0.265366	0.16953	0.0241952
32.075	0.511841	0.298455	0.216389	0.0640477
32.1	0.323993	0.255786	0.225383	0.0230198
32.125	0.375627	0.282327	0.210434	0.0212141
32.15	0.42961	0.283103	0.194361	0.0298758
32.175	0.34574	0.240845	0.178446	0.0101594
32.2	0.348449	0.248424	0.194	0.00272882
32.225	0.494875	0.281946	0.181021	0.0312023
32.25	0.62849	0.286724	0.20549	0.0582197
32.275	0.688109	0.308969	0.243097	0.0846455
32.3	0.763538	0.324759	0.199645	0.103324
32.325	0.840389	0.316594	0.201868	0.111757
32.35	0.925989	0.28736	0.19659	0.117929
32.375	0.921281	0.304084	0.217201	0.123691
32.4	0.907703	0.262545	0.239953	0.124595
32.425	0.942629	0.22913	0.261053	0.12934
32.45	0.932168	0.226456	0.28441	0.134869
32.475	0.92003	0.21446	0.307427	0.140503
32.5	0.926754	0.197464	0.344329	0.16362
32.525	0.974124	0.202266	0.383504	0.179645
32.55	0.95041	0.246501	0.371428	0.202082
32.575	0.89384	0.265622	0.401668	0.234765
32.6	0.987417	0.296888	0.394358	0.279436
32.625	1.02321	0.355416	0.340016	0.302408
32.65	1.02089	0.38507	0.348564	0.325595
32.675	1.05038	0.42661	0.329217	0.348492
32.7	0.996571	0.472761	0.280378	0.375614
32.725	0.955246	0.496775	0.262852	0.37157
32.75	0.968384	0.497679	0.258153	0.387163
32.775	0.983548	0.536332	0.217937	0.416408
32.8	0.995042	0.530044	0.18157	0.417928
32.825	1.05378	0.557806	0.204668	0.441905
32.85	1.09645	0.553548	0.240554	0.478556
32.875	1.13264	0.545215	0.301964	0.505485
32.9	1.15073	0.484619	0.353504	0.534765
32.925	1.15315	0.464255	0.358113	0.558965
32.95	1.17784	0.455012	0.382071	0.598818
32.975	1.22267	0.475065	0.375866	0.627868
33	1.10141	0.464066	0.355771	0.607877
33.025	0.961534	0.430967	0.348525	0.592821
33.05	1.05151	0.491427	0.339481	0.632741
33.075	0.828886	0.499359	0.247893	0.601001
33.1	0.751219	0.517188	0.223593	0.626043
33.125	0.717043	0.552477	0.221394	0.650583
33.15	0.658542	0.533228	0.214682	0.657517
33.175	0.517411	0.45345	0.199267	0.654022
33.2	0.447182	0.443233	0.220982	0.669773
33.225	0.512934	0.436639	0.215665	0.702882
33.25	0.552845	0.429419	0.246342	0.726641
33.275	0.522822	0.409042	0.268581	0.739056
33.3	0.620183	0.38825	0.295041	0.763045
33.325	0.751542	0.407861	0.341144	0.781319
33.35	0.779317	0.417525	0.350482	0.799985
33.375	0.85206	0.456489	0.393926	0.82795
33.4	0.94241	0.517381	0.43506	0.844821
33.425	0.943885	0.524682	0.391903	0.859425
33.45	0.963799	0.500387	0.413611	0.875455
33.475	1.00753	0.55165	0.452478	0.88044
33.5	0.943467	0.540908	0.38881	0.884235
33.525	0.908311	0.528074	0.395658	0.891415
33.55	0.83233	0.534524	0.453641	0.906422
33.575	0.778749	0.54008	0.411828	0.901992
33.6	0.719426	0.523115	0.417636	0.909718
33.625	0.702525	0.510175	0.490963	0.922501
33.65	0.675586	0.519856	0.470389	0.916567
33.675	0.60714	0.542374	0.492184	0.917005
33.7	0.698193	0.585129	0.54374	0.92786
33.725	0.636992	0.625083	0.534268	0.924676
33.75	0.657827	0.637243	0.524731	0.915922
33.775	0.689986	0.665569	0.589251	0.920761
33.8	0.696141	0.641823	0.577072	0.919469
33.825	0.698828	0.59451	0.517758	0.903092
33.85	0.726926	0.597313	0.501276	0.892783
33.875	0.708705	0.559434	0.484876	0.884029
33.9	0.69957	0.505552	0.43504	0.873567
33.925	0.796583	0.504689	0.430271	0.889672
33.95	0.840723	0.512706	0.407467	0.89629
33.975	0.780568	0.45096	0.354011	0.86639
34	0.66887	0.397436	0.30342	0.849731
34.025	0.664056	0.40847	0.236652	0.87015
34.05	0.443143	0.351475	0.174474	0.815493
34.075	0.382465	0.3565	0.156777	0.811096
34.1	0.313222	0.333371	0.0625898	0.80806
34.125	0.272342	0.325181	-5.62179e-05	0.766497
34.15	0.217223	0.282896	-0.00387145	0.730664
34.175	0.23754	0.294185	-0.0391398	0.727816
34.2	0.284703	0.348331	-0.0208602	0.738744
34.225	0.319531	0.393579	0.0121031	0.727369
34.25	0.299797	0.389531	0.082846	0.712828
34.275	0.266194	0.403114	0.0882921	0.713004
34.3	0.20003	0.414905	0.0803502	0.70354
34.325	0.231857	0.416346	0.058787	0.692541
34.35	0.106041	0.383903	0.0612715	0.67473
34.375	0.0180868	0.393792	0.068389	0.672053
34.4	0.0796065	0.351804	0.0775317	0.656567
34.425	0.0692937	0.295795	0.0697582	0.635231
34.45	0.0369605	0.265987	0.0918757	0.626457
34.475	0.0680147	0.261423	0.0843055	0.624036
34.5	0.17578	0.236088	0.132418	0.614809
34.525	0.215706	0.205634	0.194648	0.62643
34.55	0.267346	0.200185	0.203853	0.623929
34.575	0.304264	0.182846	0.200866	0.623308
34.6	0.348101	0.171865	0.205456	0.617905
34.625	0.341993	0.161813	0.155333	0.600369
34.65	0.336815	0.136314	0.104553	0.57719
34.675	0.325944	0.122672	0.0971681	0.561154
34.7	0.268214	0.0621944	0.0199467	0.534871
34.725	0.205098	0.0340748	-0.0223682	0.505828
34.75	0.177895	0.0372846	-0.00304649	0.486989
34.775	0.176091	0.0472917	-0.00365012	0.472279
34.8	0.225901	0.0058509	-0.0282722	0.462221
34.825	0.179351	0.0392834	-0.0423464	0.466237
34.85	0.115466	0.0562554	-0.0408831	0.44492
34.875	0.170227	0.0297079	-0.060111	0.443427
34.9	0.244996	0.069935	-0.0799897	0.466236
34.925	0.31024	0.0945342	-0.0893094	0.471304
34.95	0.246484	0.0240194	-0.106254	0.434169
34.975	0.143246	0.010225	-0.164406	0.416241
35	0.107425	0.0640352	-0.150234	0.42634
35.025	-0.0463838	0.0189035	-0.149612	0.356078
35.05	0.0117602	0.0439679	-0.13039	0.36579
35.075	0.0287639	0.065413	-0.133428	0.37366
35.1	-0.0432326	0.0825298	-0.124464	0.330953
35.125	-0.109725	0.0729973	-0.0898244	0.313003
35.15	-0.0932247	0.0921756	-0.124646	0.318362
35.175	-0.136678	0.0817709	-0.129284	0.329642
35.2	-0.126131	0.0354321	-0.116155	0.33945
35.225	-0.168509	-0.0177883	-0.175824	0.341514
35.25	-0.276949	-0.0837853	-0.203536	0.324063
35.275	-0.324497	-0.116423	-0.174555	0.311083
35.3	-0.314004	-0.148747	-0.182539	0.294819
35.325	-0.372997	-0.16958	-0.207939	0.26507
35.35	-0.341986	-0.177056	-0.18926	0.251573
35.375	-0.253354	-0.15326	-0.171647	0.236551
35.4	-0.254675	-0.110835	-0.144092	0.222523
35.425	-0.260333	-0.101879	-0.113601	0.20144
35.45	-0.301492	-0.066443	-0.134341	0.200784
35.475	-0.29937	-0.0455646	-0.120324	0.18605
35.5	-0.426642	-0.0721374	-0.106934	0.171347
35.525	-0.53018	-0.0529494	-0.12643	0.16826
35.55	-0.482289	-0.0681455	-0.115909	0.167148
35.575	-0.536837	-0.0894682	-0.101043	0.161061
35.6	-0.529203	-0.099903	-0.084215	0.150909
35.625	-0.493751	-0.101866	-0.126166	0.151805
35.65	-0.484625	-0.0979555	-0.152022	0.147713
35.675	-0.450557	-0.0907802	-0.111503	0.133334
35.7	-0.426883	-0.0855228	-0.142709	0.125347
35.725	-0.43161	-0.091913	-0.194132	0.104529
35.75	-0.385584	-0.103864	-0.194872	0.0834043
35.775	-0.433726	-0.0679183	-0.180098	0.0711939
35.8	-0.471505	-0.0331859	-0.235342	0.0555409
35.825	-0.415907	0.000275603	-0.237174	0.0330928
35.85	-0.409341	0.0267444	-0.222287	0.0335838
35.875	-0.280462	0.0455611	-0.204054	0.0496026
35.9	-0.227673	0.0726267	-0.192003	0.061343
35.925	-0.296551	0.0536883	-0.189548	0.0439378
35.95	-0.377406	0.0387898	-0.199942	0.0180956
35.975	-0.315476	0.0586463	-0.18371	0.0226494
36	-0.445935	-0.0351682	-0.230432	-0.0396582
36.025	-0.462309	-0.0885062	-0.231717	-0.0512383
36.05	-0.494127	-0.129754	-0.188899	-0.0606584
36.075	-0.565476	-0.17325	-0.228034	-0.103523
36.1	-0.656737	-0.211897	-0.227317	-0.125037
36.125	-0.592062	-0.167286	-0.191528	-0.120499
36.15	-0.515659	-0.172757	-0.195889	-0.111167
36.175	-0.442929	-0.183374	-0.159806	-0.100135
36.2	-0.383195	-0.154769	-0.132054	-0.0933984
36.225	-0.32693	-0.151476	-0.145554	-0.0881467
36.25	-0.362488	-0.1675	-0.0844065	-0.0957113
36.275	-0.356131	-0.185928	-0.110399	-0.10835
36.3	-0.367422	-0.14733	-0.107213	-0.109631
36.325	-0.479274	-0.188057	-0.10622	-0.130219
36.35	-0.535089	-0.188589	-0.141915	-0.149161
36.375	-0.575965	-0.150293	-0.1098	-0.15401
36.4	-0.573762	-0.166604	-0.119163	-0.151578
36.425	-0.616952	-0.18918	-0.123964	-0.167115
36.45	-0.615442	-0.156381	-0.119765	-0.167421
36.475	-0.545648	-0.161824	-0.151454	-0.162948
36.5	-0.53934	-0.183952	-0.155399	-0.162959
36.525	-0.437043	-0.22475	-0.151256	-0.172675
36.55	-0.286565	-0.246389	-0.146385	-0.177319
36.575	-0.210805	-0.280915	-0.132265	-0.183847
36.6	-0.239756	-0.293066	-0.183264	-0.201758
36.625	-0.255732	-0.311074	-0.207466	-0.234992
36.65	-0.235682	-0.308296	-0.19	-0.247853
36.675	-0.227521	-0.32997	-0.19187	-0.25811
36.7	-0.239527	-0.340171	-0.22096	-0.293813
36.725	-0.231783	-0.338233	-0.222701	-0.305138
36.75	-0.271513	-0.348267	-0.241318	-0.304379
36.775	-0.370892	-0.319406	-0.264226	-0.326116
36.8	-0.337326	-0.307057	-0.269886	-0.325406
36.825	-0.289997	-0.286775	-0.244275	-0.302586
36.85	-0.183109	-0.205286	-0.25514	-0.270674
36.875	-0.0963302	-0.191134	-0.2369	-0.236173
36.9	-0.207749	-0.201349	-0.222129	-0.236818
36.925	-0.218119	-0.161931	-0.238966	-0.231794
36.95	-0.0396976	-0.129944	-0.178704	-0.185391
36.975	-0.217156	-0.168281	-0.158829	-0.226675
37	-0.20981	-0.158425	-0.12324	-0.205084
37.025	-0.167237	-0.18737	-0.144976	-0.207447
37.05	-0.343452	-0.238343	-0.180225	-0.249981
37.075	-0.422488	-0.265793	-0.168987	-0.277628
37.1	-0.320367	-0.287009	-0.156323	-0.278406
37.125	-0.299685	-0.307155	-0.145594	-0.275559
37.15	-0.259994	-0.323608	-0.134949	-0.275978
37.175	-0.295623	-0.343969	-0.15434	-0.286158
37.2	-0.280673	-0.352858	-0.185425	-0.283935
37.225	-0.233122	-0.347672	-0.154707	-0.287698
37.25	-0.230108	-0.344295	-0.164978	-0.300161
37.275	-0.23326	-0.33878	-0.165624	-0.284193
37.3	-0.288621	-0.338996	-0.199153	-0.282725
37.325	-0.360809	-0.35924	-0.266589	-0.301014
37.35	-0.371117	-0.366486	-0.294121	-0.301082
37.375	-0.408018	-0.356213	-0.290217	-0.297606
37.4	-0.427295	-0.338804	-0.269692	-0.304593
37.425	-0.45051	-0.358533	-0.265504	-0.301659
37.45	-0.459954	-0.361825	-0.241116	-0.300451
37.475	-0.461591	-0.362983	-0.220098	-0.299924
37.5	-0.407256	-0.359379	-0.186544	-0.29903
37.525	-0.443619	-0.356367	-0.172158	-0.303344
37.55	-0.417907	-0.33773	-0.16005	-0.298578
37.575	-0.39475	-0.357576	-0.146073	-0.299663
37.6	-0.458079	-0.356953	-0.169022	-0.307567
37.625	-0.409319	-0.355167	-0.21185	-0.31159
37.65	-0.343709	-0.359391	-0.23539	-0.303009
37.675	-0.345674	-0.349136	-0.236234	-0.306425
37.7	-0.325458	-0.306902	-0.301377	-0.303422
37.725	-0.250066	-0.297016	-0.302412	-0.294899
37.75	-0.21467	-0.310151	-0.265477	-0.279144
37.775	-0.186009	-0.270183	-0.271794	-0.273264
37.8	-0.191112	-0.223495	-0.283043	-0.250103
37.825	-0.111003	-0.194234	-0.21479	-0.216734
37.85	-0.0709865	-0.152692	-0.187522	-0.190769
37.875	-0.211005	-0.131571	-0.175965	-0.216865
37.9	-0.285166	-0.168009	-0.153309	-0.233982
37.925	-0.167951	-0.137029	-0.0957778	-0.20681
37.95	-0.289087	-0.147373	-0.131719	-0.251347
37.975	-0.287808	-0.132564	-0.129714	-0.247593
38	-0.234088	-0.129093	-0.147587	-0.246607
38.025	-0.328183	-0.124784	-0.174658	-0.289468
38.05	-0.422186	-0.152601	-0.217355	-0.31037
38.075	-0.386924	-0.144432	-0.185617	-0.310547
38.1	-0.380846	-0.129704	-0.18632	-0.301816
38.125	-0.458172	-0.0968809	-0.196638	-0.30117
38.15	-0.488206	-0.0940728	-0.164641	-0.298249
38.175	-0.516586	-0.158404	-0.180004	-0.305118
38.2	-0.492065	-0.133843	-0.18265	-0.299925
38.225	-0.416272	-0.117951	-0.135235	-0.283638
38.25	-0.385746	-0.164888	-0.112511	-0.277218
38.275	-0.36285	-0.1711	-0.102026	-0.267532
38.3	-0.298345	-0.165037	-0.091768	-0.271187
38.325	-0.243446	-0.194778	-0.0793827	-0.273037
38.35	-0.254205	-0.192649	-0.0685301	-0.278177
38.375	-0.258829	-0.19095	-0.0543962	-0.284852
38.4	-0.275773	-0.185551	-0.0636076	-0.288137
38.425	-0.280976	-0.186679	-0.0610121	-0.292946
38.45	-0.197138	-0.201863	-0.0614016	-0.295282
38.475	-0.146775	-0.226772	-0.0834563	-0.294764
38.5	-0.152385	-0.203944	-0.113516	-0.28934
38.525	-0.130608	-0.212785	-0.138	-0.292858
38.55	-0.119182	-0.220108	-0.151797	-0.286774
38.575	-0.095891	-0.209195	-0.174645	-0.282812
38.6	-0.128932	-0.202415	-0.16583	-0.29145
38.625	-0.127352	-0.183252	-0.189454	-0.287852
38.65	-0.138561	-0.175774	-0.183665	-0.283804
38.675	-0.160049	-0.159478	-0.222446	-0.289106
38.7	-0.175212	-0.166115	-0.200888	-0.295221
38.725	-0.17363	-0.154722	-0.193914	-0.297316
38.75	-0.171363	-0.168544	-0.208996	-0.296108
38.775	-0.261967	-0.22335	-0.177465	-0.304387
38.8	-0.0556001	-0.187135	-0.141852	-0.269338
38.825	0.0884619	-0.177314	-0.116617	-0.253102
38.85	-0.00174148	-0.203871	-0.111565	-0.28896
38.875	-0.115804	-0.250973	-0.110287	-0.290192
38.9	0.0407482	-0.209094	-0.0406373	-0.245985
38.925	-0.136133	-0.272129	-0.0743315	-0.293221
38.95	-0.0747296	-0.311377	-0.0805051	-0.269298
38.975	-0.0575428	-0.31068	-0.0512106	-0.25129
39	-0.224741	-0.32207	-0.0636018	-0.28692
39.025	-0.378798	-0.384568	-0.106127	-0.302914
39.05	-0.487077	-0.392818	-0.0794532	-0.273014
39.075	-0.441084	-0.386836	-0.0439369	-0.254874
39.1	-0.381093	-0.341457	-0.0538426	-0.243405
39.125	-0.385646	-0.33426	-0.0423583	-0.240156
39.15	-0.410992	-0.315672	-0.0232604	-0.249192
39.175	-0.379192	-0.27703	-0.0486348	-0.255652
39.2	-0.413846	-0.262551	-0.0620216	-0.261337
39.225	-0.404935	-0.264344	-0.0702956	-0.254321
39.25	-0.373615	-0.243618	-0.0946201	-0.258612
39.275	-0.276565	-0.205938	-0.0952239	-0.265555
39.3	-0.274085	-0.234599	-0.0852389	-0.272664
39.325	-0.28702	-0.242801	-0.0887121	-0.265845
39.35	-0.262297	-0.213863	-0.0915852	-0.249451
39.375	-0.228065	-0.23569	-0.0684798	-0.237041
39.4	-0.242698	-0.234188	-0.0739683	-0.214822
39.425	-0.260043	-0.186938	-0.057572	-0.190894
39.45	-0.174049	-0.149112	-0.020043	-0.170724
39.475	-0.24706	-0.150276	-0.0342115	-0.162584
39.5	-0.348016	-0.115697	-0.0298801	-0.144166
39.525	-0.306491	-0.0935376	-0.0288387	-0.148586
39.55	-0.310342	-0.144131	-0.021594	-0.170426
39.575	-0.389651	-0.149489	-0.0315949	-0.191657
39.6	-0.372094	-0.131117	-0.0169403	-0.200053
39.625	-0.322284	-0.150249	-0.0196795	-0.225166
39.65	-0.364628	-0.135793	-0.0243046	-0.239548
39.675	-0.380451	-0.133723	-0.0802769	-0.234743
39.7	-0.359854	-0.127025	-0.104897	-0.232335
39.725	-0.355038	-0.108294	-0.119385	-0.222012
39.75	-0.210784	-0.0885136	-0.127047	-0.197227
39.775	-0.0475899	-0.0405557	-0.116903	-0.164583
39.8	0.0603214	-0.0151809	-0.0875441	-0.138099
39.825	0.0103669	-0.0485476	-0.0894767	-0.170771
39.85	-0.0326964	-0.0846786	-0.0845792	-0.190347
39.875	0.0329024	-0.0638634	-0.0859782	-0.177383
39.9	-0.0716953	-0.149441	-0.110683	-0.245131
39.925	-0.0759547	-0.195964	-0.142857	-0.252518
39.95	-0.103513	-0.196458	-0.160431	-0.249855
39.975	-0.232357	-0.235258	-0.194378	-0.293252
40	-0.281343	-0.311374	-0.250483	-0.322751
40.025	-0.214751	-0.302678	-0.231107	-0.307723
40.05	-0.101572	-0.299597	-0.187517	-0.290856
40.075	-0.0262441	-0.31296	-0.17415	-0.286842
40.1	0.0118884	-0.301335	-0.139155	-0.276277
40.125	0.0151097	-0.254579	-0.0991358	-0.265472
40.15	-0.0125744	-0.218976	-0.111331	-0.259503
40.175	-0.0376373	-0.203905	-0.119027	-0.251318
40.2	-0.106082	-0.185234	-0.142065	-0.240741
40.225	-0.169525	-0.181634	-0.157533	-0.225854
40.25	-0.229248	-0.171899	-0.16805	-0.231801
40.275	-0.278712	-0.132018	-0.177453	-0.239367
40.3	-0.289955	-0.148223	-0.200376	-0.237847
40.325	-0.355525	-0.148931	-0.221445	-0.23841
40.35	-0.322929	-0.153933	-0.203819	-0.236036
40.375	-0.330676	-0.165887	-0.183303	-0.230419
40.4	-0.359321	-0.169922	-0.1741	-0.229835
40.425	-0.347202	-0.17915	-0.11307	-0.23055
40.45	-0.280585	-0.208741	-0.0691447	-0.219567
40.475	-0.301817	-0.175997	-0.0874253	-0.216648
40.5	-0.268115	-0.167613	-0.0799329	-0.213738
40.525	-0.256196	-0.145918	-0.0629012	-0.21646
40.55	-0.290011	-0.0938687	-0.0264917	-0.231276
40.575	-0.307856	-0.0931155	-0.0236856	-0.246279
40.6	-0.278366	-0.0743122	-0.0564884	-0.248879
40.625	-0.309029	-0.0507752	-0.0794063	-0.258052
40.65	-0.207912	-0.0387203	-0.114786	-0.257667
40.675	-0.238202	-0.0365966	-0.172024	-0.253826
40.7	-0.215692	-0.0260841	-0.131082	-0.267945
40.725	-0.150949	-0.0622012	-0.0856018	-0.258765
40.75	-0.0252152	-0.0269764	-0.10136	-0.221615
40.775	0.0789557	0.017837	-0.0772093	-0.213602
40.8	0.0366579	-0.0209942	-0.0840016	-0.231562
40.825	-0.0126512	-0.0445616	-0.136962	-0.254064
40.85	0.0224181	-0.0362795	-0.0946557	-0.23697
40.875	-0.25864	-0.122182	-0.127841	-0.286647
40.9	-0.323353	-0.151982	-0.14852	-0.287721
40.925	-0.389157	-0.168607	-0.198552	-0.284131
40.95	-0.553051	-0.209408	-0.2412	-0.313729
40.975	-0.667173	-0.249146	-0.29235	-0.340583
41	-0.658253	-0.232143	-0.240192	-0.326041
41.025	-0.668347	-0.223692	-0.19169	-0.300581
41.05	-0.589439	-0.210438	-0.17693	-0.285821
41.075	-0.526542	-0.193148	-0.154206	-0.267822
41.1	-0.512675	-0.189585	-0.129998	-0.27504
41.125	-0.417506	-0.199078	-0.124246	-0.261224
41.15	-0.32543	-0.2092	-0.0853311	-0.243323
41.175	-0.285502	-0.224456	-0.0649824	-0.229502
41.2	-0.243108	-0.203967	-0.0927026	-0.211009
41.225	-0.226181	-0.153713	-0.124402	-0.188879
41.25	-0.163772	-0.119197	-0.0931774	-0.183681
41.275	-0.222507	-0.0495866	-0.10908	-0.182365
41.3	-0.226808	-0.00294251	-0.129975	-0.163259
41.325	-0.212264	0.00993448	-0.0920082	-0.152296
41.35	-0.251976	0.00459832	-0.0715614	-0.163443
41.375	-0.292965	0.0346209	-0.11244	-0.168861
41.4	-0.229284	0.0316821	-0.0481563	-0.172185
41.425	-0.292628	-0.025579	-0.0285743	-0.180493
41.45	-0.306837	-0.034746	-0.0331017	-0.187705
41.475	-0.238528	-0.0648112	-0.0123144	-0.197945
41.5	-0.272819	-0.108558	-0.0437034	-0.196631
41.525	-0.284405	-0.129409	-0.0703211	-0.194098
41.55	-0.254713	-0.117325	-0.0780431	-0.193027
41.575	-0.261794	-0.0839294	-0.0790426	-0.190171
41.6	-0.313698	-0.132649	-0.0891836	-0.188801
41.625	-0.372574	-0.149326	-0.0616772	-0.192652
41.65	-0.311502	-0.149213	-0.0457598	-0.19875
41.675	-0.356499	-0.149357	-0.0435788	-0.201012
41.7	-0.386684	-0.123345	0.0026939	-0.20192
41.725	-0.286281	-0.0535607	0.0178004	-0.178362
41.75	-0.135435	-0.0106335	0.0543597	-0.168416
41.775	-0.203633	-0.0324076	0.0526409	-0.190846
41.8	-0.165807	-0.0196022	0.0307223	-0.191558
41.825	0.01072	0.0849732	0.0491562	-0.158697
41.85	-0.056658	0.0595482	0.0391198	-0.200178
41.875	0.0857691	0.0956951	0.0432269	-0.17837
41.9	0.158543	0.113137	0.0577356	-0.166253
41.925	0.171725	0.019604	0.059599	-0.187651
41.95	0.156202	-0.0326553	0.110347	-0.193698
41.975	0.18782	0.00344599	0.114183	-0.18332
42	0.243024	-0.0341473	0.107491	-0.165835
42.025	0.291772	-0.0363927	0.132182	-0.142654
42.05	0.330176	-0.0259742	0.129621	-0.131458
42.075	0.304377	-0.0278552	0.131671	-0.125865
42.1	0.370974	-0.00291508	0.112267	-0.131351
42.125	0.424839	0.0560785	0.160637	-0.120606
42.15	0.458975	0.0850256	0.19447	-0.114171
42.175	0.502428	0.126807	0.197277	-0.11335
42.2	0.57575	0.213322	0.229974	-0.100567
42.225	0.582113	0.217879	0.26721	-0.106061
42.25	0.515679	0.244929	0.258056	-0.115942
42.275	0.535291	0.307569	0.275322	-0.122677
42.3	0.531541	0.306395	0.261883	-0.121872
42.325	0.479999	0.290752	0.244668	-0.115629
42.35	0.533866	0.329164	0.209615	-0.107028
42.375	0.583474	0.352962	0.191797	-0.103122
42.4	0.576645	0.339287	0.174664	-0.0962979
42.425	0.667139	0.340429	0.20002	-0.0860484
42.45	0.736363	0.344686	0.230779	-0.0688576
42.475	0.7995	0.322673	0.241965	-0.0509348
42.5	0.882044	0.322248	0.285019	-0.0389631
42.525	0.851377	0.36602	0.351025	-0.0325856
42.55	0.834492	0.36194	0.382356	-0.0418719
42.575	0.838965	0.379803	0.414188	-0.0497341
42.6	0.803629	0.418256	0.405893	-0.0536441
42.625	0.763381	0.427654	0.407891	-0.0522495
42.65	0.779922	0.449031	0.364741	-0.0596766
42.675	0.716516	0.502897	0.331155	-0.0556906
42.7	0.742487	0.574928	0.314569	-0.0325239
42.725	0.852575	0.562534	0.344504	-0.0113556
42.75	0.816983	0.529865	0.285174	-0.0234359
42.775	0.804787	0.529976	0.235781	-0.0325399
42.8	0.882508	0.51573	0.260321	-0.00348063
42.825	0.789483	0.413527	0.248922	-0.0502755
42.85	0.820662	0.429755	0.231515	-0.0459066
42.875	0.826425	0.43216	0.252552	-0.0485431
42.9	0.812109	0.371433	0.262081	-0.0717889
42.925	0.74852	0.33182	0.232954	-0.0950471
42.95	0.698985	0.354401	0.219882	-0.0883435
42.975	0.724369	0.394891	0.25603	-0.0791659
43	0.710827	0.398295	0.283643	-0.0824359
43.025	0.731978	0.396606	0.308313	-0.0834627
43.05	0.726081	0.433612	0.286281	-0.100824
43.075	0.715993	0.400647	0.308821	-0.116941
43.1	0.68834	0.357672	0.280893	-0.127191
43.125	0.651749	0.397148	0.2626	-0.149226
43.15	0.583098	0.41972	0.258206	-0.165786
43.175	0.550882	0.399159	0.270335	-0.15141
43.2	0.434643	0.396759	0.273611	-0.137839
43.225	0.368489	0.412077	0.230701	-0.126656
43.25	0.373971	0.415809	0.25241	-0.102645
43.275	0.370276	0.431741	0.262776	-0.0826284
43.3	0.394824	0.445035	0.229905	-0.0666067
43.325	0.417181	0.445929	0.241214	-0.0565448
43.35	0.486296	0.444407	0.250869	-0.038056
43.375	0.580762	0.431595	0.231064	-0.0467318
43.4	0.615265	0.403256	0.180021	-0.0625749
43.425	0.641873	0.413774	0.197068	-0.0690425
43.45	0.675082	0.443399	0.215865	-0.0762903
43.475	0.67569	0.427886	0.214338	-0.0824347
43.5	0.674859	0.431586	0.246012	-0.0823663
43.525	0.723655	0.439247	0.300746	-0.0741116
43.55	0.809705	0.442102	0.308872	-0.0665601
43.575	0.759533	0.403918	0.312145	-0.0657223
43.6	0.717543	0.418104	0.328469	-0.0557071
43.625	0.766501	0.396239	0.319401	-0.04198
43.65	0.827919	0.375237	0.310457	-0.0299247
43.675	0.862922	0.40569	0.320915	-0.00150089
43.7	0.938746	0.42343	0.317184	0.0247509
43.725	0.889081	0.417278	0.266983	-0.000836292
43.75	0.84521	0.407008	0.28099	-0.0220149
43.775	0.930999	0.465496	0.288386	0.00371626
43.8	0.84825	0.443411	0.252994	-0.033381
43.825	0.814114	0.455466	0.26532	-0.0351423
43.85	0.794801	0.461796	0.262592	-0.0347525
43.875	0.693206	0.419755	0.186437	-0.0682454
43.9	0.495906	0.386863	0.151408	-0.0845784
43.925	0.5226	0.389233	0.104189	-0.079976
43.95	0.584865	0.388187	0.0524851	-0.0705903
43.975	0.516397	0.385585	0.0200805	-0.0608882
44	0.49631	0.353627	0.0124708	-0.070977
44.025	0.492578	0.304642	-0.000298754	-0.0698887
44.05	0.459078	0.266107	-0.0177464	-0.0641826
44.075	0.376451	0.251419	-0.0144173	-0.0673233
44.1	0.403762	0.228095	0.0264548	-0.0586782
44.125	0.444765	0.206326	0.0751236	-0.0460513
44.15	0.427896	0.235194	0.0870948	-0.0451365
44.175	0.429665	0.236245	0.122036	-0.0359412
44.2	0.467775	0.229839	0.158229	-0.0216175
44.225	0.497917	0.262622	0.162141	-0.0164622
44.25	0.540131	0.283335	0.18499	-0.0226642
44.275	0.567284	0.286129	0.185347	-0.0123764
44.3	0.536739	0.31913	0.154154	-0.0166617
44.325	0.462552	0.307108	0.16509	-0.0207132
44.35	0.47461	0.27184	0.133369	-0.0222939
44.375	0.436393	0.253132	0.135774	-0.0241987
44.4	0.381288	0.231912	0.183786	-0.0370423
44.425	0.352146	0.222286	0.16148	-0.039744
44.45	0.275051	0.199023	0.154879	-0.0495927
44.475	0.209639	0.184293	0.187264	-0.0520301
44.5	0.181332	0.171752	0.161268	-0.0562128
44.525	0.124354	0.146971	0.128201	-0.0669926
44.55	0.052515	0.118829	0.102292	-0.0758797
44.575	0.0361261	0.104202	0.0517469	-0.0750935
44.6	-0.0141065	0.111116	-0.0288351	-0.0743816
44.625	0.0110966	0.11114	-0.0459173	-0.0647142
44.65	0.140139	0.125176	-0.0478935	-0.0285499
44.675	0.250521	0.129719	-0.0484328	-0.0100784
44.7	0.175451	0.0888945	-0.0560433	-0.0393053
44.725	0.204544	0.0537385	-0.057196	-0.0352833
44.75	0.34329	0.109504	-0.0620881	-0.00873992
44.775	0.189078	0.0607762	-0.0986005	-0.059413
44.8	0.211597	0.0631333	-0.0570504	-0.055152
44.825	0.217835	0.0982939	-0.0839965	-0.0590471
44.85	0.0324163	0.0493137	-0.109519	-0.101027
44.875	-0.0578004	0.0570434	-0.128699	-0.11369
44.9	-0.0425545	0.133892	-0.097739	-0.0949018
44.925	-0.0247468	0.142719	-0.0737261	-0.0727595
44.95	-0.00667675	0.137939	-0.031516	-0.0465362
44.975	-0.00582438	0.141781	-0.0118076	-0.034821
45	-0.0553242	0.130668	0.0174066	-0.0263993
45.025	-0.0663581	0.114589	-0.0171815	-0.017087
45.05	0.0025193	0.0971177	-0.00527276	-0.00673654
45.075	0.0244257	0.07755	-0.0314296	-0.00699218
45.1	0.0318744	0.0499033	-0.05918	-0.00456286
45.125	0.0109636	0.00982626	-0.11306	-0.0182759
45.15	0.00113429	0.0187022	-0.0795155	-0.0424874
45.175	-0.07545	0.0320472	-0.0935308	-0.0718343
45.2	-0.133123	0.0432656	-0.119867	-0.094682
45.225	-0.18015	0.041549	-0.0891816	-0.110162
45.25	-0.268223	0.0477138	-0.0821182	-0.128731
45.275	-0.377503	0.0549583	-0.0987528	-0.144721
45.3	-0.441293	0.0272064	-0.143652	-0.151093
45.325	-0.421248	0.072761	-0.154983	-0.136628
45.35	-0.407455	0.0366556	-0.161457	-0.114905
45.375	-0.42716	0.0241284	-0.196326	-0.0989773
45.4	-0.388183	0.0052124	-0.209744	-0.0723264
45.425	-0.325246	-0.0191648	-0.191877	-0.0551783
45.45	-0.278206	-0.0642857	-0.194933	-0.0560702
45.475	-0.222488	-0.0352589	-0.200911	-0.0504873
45.5	-0.185245	-0.0673212	-0.181756	-0.0471612
45.525	-0.196316	-0.0940295	-0.130728	-0.0581203
45.55	-0.191905	-0.0874407	-0.146127	-0.0750304
45.575	-0.223368	-0.082962	-0.162036	-0.0829502
45.6	-0.194502	-0.0663469	-0.161097	-0.0804081
45.625	-0.0329262	-0.00127005	-0.151722	-0.0608819
45.65	0.0511321	0.0647174	-0.158216	-0.0375225
45.675	-0.0378278	0.0464003	-0.143439	-0.0652457
45.7	-0.0294752	0.0581051	-0.1567	-0.0781733
45.725	0.10629	0.0985186	-0.176215	-0.0538786
45.75	-0.101382	0.0311641	-0.184434	-0.0972839
45.775	-0.0828931	0.0487472	-0.178861	-0.0953071
45.8	-0.0936164	0.0376008	-0.1918	-0.0910391
45.825	-0.332151	-0.0312717	-0.129559	-0.111231
45.85	-0.478935	-0.0697176	-0.107081	-0.133752
45.875	-0.514693	-0.0993641	-0.135733	-0.113209
45.9	-0.524251	-0.109861	-0.112787	-0.0917389
45.925	-0.470725	-0.0671089	-0.0984836	-0.0930003
45.95	-0.394542	-0.061956	-0.0844739	-0.0895526
45.975	-0.389155	-0.0841158	-0.0812302	-0.0878768
46	-0.388354	-0.0641138	-0.0870406	-0.0969047
46.025	-0.394689	-0.0863913	-0.0987117	-0.0979732
46.05	-0.375555	-0.13993	-0.124967	-0.101874
46.075	-0.407752	-0.0982922	-0.160323	-0.115142
46.1	-0.43278	-0.0734775	-0.136667	-0.115776
46.125	-0.447294	-0.122088	-0.130695	-0.100138
46.15	-0.484761	-0.143093	-0.138328	-0.0891802
46.175	-0.508988	-0.113109	-0.163675	-0.077219
46.2	-0.411432	-0.119762	-0.180495	-0.0689916
46.225	-0.374616	-0.111314	-0.183865	-0.0646838
46.25	-0.412154	-0.0600062	-0.181937	-0.0699655
46.275	-0.39568	-0.0482213	-0.179433	-0.0505698
46.3	-0.434165	-0.0941515	-0.151822	-0.0554321
46.325	-0.534823	-0.0648088	-0.133711	-0.0581579
46.35	-0.531157	-0.0755055	-0.153511	-0.0510493
46.375	-0.524472	-0.143481	-0.134775	-0.0647235
46.4	-0.600439	-0.17052	-0.0961869	-0.0686706
46.425	-0.596365	-0.162729	-0.0923791	-0.0660522
46.45	-0.576228	-0.249931	-0.0957794	-0.0739767
46.475	-0.58164	-0.310687	-0.0856377	-0.0804363
46.5	-0.627907	-0.295401	-0.104444	-0.0841699
46.525	-0.500142	-0.347939	-0.134157	-0.0877928
46.55	-0.496483	-0.351374	-0.177092	-0.083359
46.575	-0.507433	-0.310225	-0.163478	-0.0744833
46.6	-0.318489	-0.261304	-0.121188	-0.0379186
46.625	-0.190881	-0.231635	-0.134577	-0.0154639
46.65	-0.293458	-0.214119	-0.19638	-0.039271
46.675	-0.303814	-0.198812	-0.217722	-0.0563359
46.7	-0.18851	-0.139737	-0.227901	-0.0348452
46.725	-0.398095	-0.171597	-0.308705	-0.0914911
46.75	-0.454802	-0.183162	-0.260147	-0.100659
46.775	-0.469393	-0.178375	-0.278802	-0.099539
46.8	-0.656744	-0.219012	-0.349512	-0.128681
46.825	-0.735998	-0.259104	-0.398136	-0.150015
46.85	-0.739944	-0.291324	-0.386249	-0.12313
46.875	-0.671501	-0.310902	-0.413002	-0.0971239
46.9	-0.616072	-0.307445	-0.39534	-0.0900313
46.925	-0.546536	-0.305741	-0.348963	-0.0818821
46.95	-0.5248	-0.303371	-0.36751	-0.0881892
46.975	-0.492376	-0.313445	-0.335748	-0.0883821
47	-0.407945	-0.285592	-0.286708	-0.0940756
47.025	-0.433381	-0.286652	-0.24863	-0.0952389
47.05	-0.455009	-0.273333	-0.22242	-0.0995437
47.075	-0.411251	-0.25291	-0.216926	-0.108606
47.1	-0.427563	-0.24893	-0.214303	-0.116985
47.125	-0.474638	-0.261081	-0.248305	-0.114965
47.15	-0.437197	-0.267093	-0.304253	-0.113006
47.175	-0.420554	-0.271608	-0.299328	-0.112606
47.2	-0.384447	-0.279372	-0.284178	-0.10678
47.225	-0.304919	-0.27038	-0.283317	-0.107978
47.25	-0.309987	-0.27826	-0.259043	-0.101583
47.275	-0.288206	-0.296771	-0.231864	-0.0998429
47.3	-0.224643	-0.297878	-0.200488	-0.0966738
47.325	-0.249463	-0.293221	-0.213508	-0.0879521
47.35	-0.198678	-0.303574	-0.174735	-0.0827741
47.375	-0.170718	-0.274546	-0.16793	-0.0888011
47.4	-0.283728	-0.254928	-0.198415	-0.0819834
47.425	-0.378929	-0.22837	-0.183761	-0.072153
47.45	-0.38661	-0.196782	-0.179832	-0.0796334
47.475	-0.435399	-0.154092	-0.21051	-0.0812209
47.5	-0.47415	-0.132063	-0.180073	-0.0689903
47.525	-0.459533	-0.12321	-0.191713	-0.0814259
47.55	-0.418832	-0.0801996	-0.196732	-0.0815451
47.575	-0.262174	-0.0987328	-0.134086	-0.0549604
47.6	-0.142401	-0.0845551	-0.103181	-0.045626
47.625	-0.199616	-0.129466	-0.138943	-0.0718031
47.65	-0.216659	-0.160363	-0.13206	-0.0874645
47.675	-0.130044	-0.1707	-0.0953029	-0.0629781
47.7	-0.276768	-0.185352	-0.132515	-0.103541
47.725	-0.290566	-0.224981	-0.119138	-0.102865
47.75	-0.284259	-0.229276	-0.0931369	-0.0940673
47.775	-0.425661	-0.232356	-0.1444	-0.120556
47.8	-0.464494	-0.281948	-0.177716	-0.133095
47.825	-0.351876	-0.299267	-0.138206	-0.130513
47.85	-0.240476	-0.224406	-0.116549	-0.117379
47.875	-0.20076	-0.24279	-0.10652	-0.114844
47.9	-0.167926	-0.217514	-0.0861969	-0.111926
47.925	-0.202119	-0.193075	-0.086068	-0.107447
47.95	-0.228394	-0.193475	-0.068737	-0.103827
47.975	-0.18615	-0.148389	-0.0412187	-0.103681
48	-0.193198	-0.16454	-0.0322761	-0.094148
48.025	-0.261763	-0.181197	-0.0391497	-0.0804423
48.05	-0.284291	-0.179734	-0.0449551	-0.0722427
48.075	-0.293319	-0.180608	-0.10658	-0.0613868
48.1	-0.250953	-0.211874	-0.0794678	-0.0631468
48.125	-0.231178	-0.224177	-0.0831004	-0.0674837
48.15	-0.244318	-0.218626	-0.112887	-0.069149
48.175	-0.205452	-0.212277	-0.0990266	-0.0711235
48.2	-0.176999	-0.221997	-0.0937998	-0.0679545
48.225	-0.176267	-0.19838	-0.121168	-0.0682184
48.25	-0.208738	-0.179698	-0.163136	-0.0708984
48.275	-0.242214	-0.158857	-0.149107	-0.0760211
48.3	-0.302162	-0.169543	-0.147671	-0.0716274
48.325	-0.363272	-0.180531	-0.1327	-0.068283
48.35	-0.454559	-0.183036	-0.114862	-0.0551533
48.375	-0.484029	-0.184693	-0.0885621	-0.0571262
48.4	-0.525314	-0.234018	-0.0759973	-0.0585373
48.425	-0.595052	-0.237785	-0.0367943	-0.0572402
48.45	-0.615428	-0.267802	0.0225733	-0.0570807
48.475	-0.578975	-0.287166	0.0230274	-0.0584564
48.5	-0.480698	-0.281931	-0.0114247	-0.0543647
48.525	-0.458208	-0.23979	-0.0257331	-0.0523671
48.55	-0.282512	-0.203002	-0.0212655	-0.0283325
48.575	-0.0812969	-0.166134	-0.0132028	-0.0109843
48.6	-0.134733	-0.149714	-0.0538563	-0.0323122
48.625	-0.136232	-0.126862	-0.106277	-0.0380822
48.65	0.0367258	-0.0959872	-0.147972	-0.00680212
48.675	-0.0330935	-0.144274	-0.215996	-0.0507819
48.7	-0.106112	-0.129168	-0.206838	-0.0515417
48.725	-0.116026	-0.123888	-0.202798	-0.0406639
48.75	-0.224429	-0.163966	-0.214301	-0.0660524
48.775	-0.357892	-0.133343	-0.260738	-0.0880968
48.8	-0.349214	-0.135507	-0.282183	-0.0878003
48.825	-0.282203	-0.114257	-0.237719	-0.0638513
48.85	-0.277943	-0.0679851	-0.171211	-0.0507444
48.875	-0.341105	-0.0761747	-0.140295	-0.0497528
48.9	-0.351556	-0.0952197	-0.0990943	-0.0402191
48.925	-0.301433	-0.0972266	-0.0900207	-0.031147
48.95	-0.308145	-0.106946	-0.0927816	-0.0311817
48.975	-0.283192	-0.145136	-0.0916218	-0.039334
49	-0.216154	-0.128287	-0.0470719	-0.0385098
49.025	-0.152947	-0.0734927	-0.0283996	-0.0456323
49.05	-0.120087	-0.0777779	-0.0254589	-0.0379774
49.075	-0.0391336	-0.0428348	-0.000638185	-0.0433111
49.1	-0.00260561	0.00393022	0.0102726	-0.0465907
49.125	-0.0910754	0.0416338	0.0302665	-0.0361085
49.15	-0.105579	0.0269101	0.0285678	-0.0330641
49.175	-0.0839477	0.00896011	0.0190508	-0.0190714
49.2	-0.157254	-0.0466534	-0.00609321	-0.0118549
49.225	-0.204669	-0.0770711	-0.0147617	-0.00200922
49.25	-0.276016	-0.086814	-0.0307276	-0.00409105
49.275	-0.285767	-0.102187	-0.0575478	-0.0262633
49.3	-0.303076	-0.0943318	-0.0773342	-0.0331736
49.325	-0.286731	-0.108544	-0.0972437	-0.0418167
49.35	-0.211467	-0.178801	-0.165697	-0.0630401
49.375	-0.212704	-0.174708	-0.160793	-0.07654
49.4	-0.265684	-0.179691	-0.163922	-0.0768975
49.425	-0.284785	-0.216385	-0.172693	-0.0827657
49.45	-0.255538	-0.224916	-0.185765	-0.0782955
49.475	-0.305963	-0.24891	-0.133327	-0.0679941
49.5	-0.275957	-0.226159	-0.0948695	-0.0436537
49.525	-0.214433	-0.176551	-0.0430805	-0.00297001
49.55	-0.214547	-0.123561	0.0285542	0.0268697
49.575	-0.278451	-0.0768706	0.0544559	0.0211893
49.6	-0.274523	-0.0976092	0.0844135	0.0132549
49.625	-0.170982	-0.0604698	0.125016	0.0444577
49.65	-0.301037	-0.0874571	0.121702	-0.00965964
49.675	-0.286003	-0.086119	0.134131	0.00202216
49.7	-0.260682	-0.118578	0.12737	0.00634222
49.725	-0.390323	-0.133527	0.102805	-0.0319446
49.75	-0.4829	-0.137045	0.0543638	-0.058751
49.775	-0.404418	-0.131751	0.0749024	-0.0655542
49.8	-0.380647	-0.129933	0.020445	-0.0695169
49.825	-0.389514	-0.13832	0.0164635	-0.0755308
49.85	-0.383862	-0.162108	0.0229781	-0.0810277
49.875	-0.334522	-0.185095	-0.0204085	-0.0916616
49.9	-0.289168	-0.179954	-0.0321756	-0.10039
49.925	-0.277373	-0.206461	-0.0227082	-0.106602
49.95	-0.212268	-0.181002	-0.00276456	-0.0926312
[truncated: 2,042 more rows]
