# Supplementary material for: Corticothalamic gating of population auditory thalamocortical transmission in mouse
Source: eLife. 2021 May 24;10:e56645. doi: 10.7554/eLife.56645 (PMC8186908; doi:10.7554/eLife.56645)
Supplement: Figure 2—source data 2. [file elife-56645-fig2-data2.xlsx]

## Sheet: Figure 2E
Time	Df/f (Calcium signals)
(s)	IC	MGB	AC
0.25	-0.132875	-0.00294641	-0.0634654
0.5	-0.0393467	-0.16082	-0.0314417
0.75	-0.0712354	-0.128092	0.00413079
1	-0.185467	0.0775762	-0.0231526
1.25	-0.048677	0.0472574	0.117246
1.5	-0.0531327	-0.0775456	0.153923
1.75	-0.0227282	0.0359107	0.0786275
2	0.151386	0.184819	0.086948
2.25	2.88376	0.380317	0.491669
2.5	6.31311	0.523029	3.64017
2.75	8.2199	1.01838	8.25636
3	9.16118	1.06637	11.4799
3.25	8.42313	1.13963	13.0399
3.5	6.91441	1.0699	12.0408
3.75	4.92247	0.715751	9.59429
4	3.40802	0.61374	6.89068
4.25	2.05431	0.506293	4.26309
4.5	0.018071	0.13966	1.30749
4.75	-0.922163	-0.103129	-0.933364
5	-2.13615	-0.274362	-3.11891
5.25	-3.18091	-0.632627	-4.74592
5.5	-3.29452	-0.514304	-5.81675
5.75	-3.6757	-0.429095	-6.22136
6	-3.48159	-0.584864	-6.40428
6.25	-3.37736	-0.466333	-5.99062
6.5	-3.16172	-0.519897	-5.44424
6.75	-2.85105	-0.461122	-4.689
7	-2.54624	-0.368072	-3.93701
7.25	-2.27629	-0.211705	-3.40707
7.5	-2.05017	-0.361326	-2.88192
7.75	-1.76405	-0.169904	-2.28755
8	-1.67124	-0.118945	-1.89518
8.25	-1.28421	-0.145459	-1.63648
8.5	-1.12665	-0.126862	-1.2963
8.75	-1.01496	-0.0448348	-1.10416
9	-0.955344	-0.0882525	-0.957041
9.25	-1.11115	-0.251634	-0.810814
9.5	-0.744885	-0.151596	-0.573749
9.75	-0.584421	0.0383186	-0.508769
10	-0.717243	-0.120918	-0.498399
10.25	-0.538257	-0.0315111	-0.455072
10.5	-0.667182	-0.0903162	-0.355971
10.75	-0.454336	-0.04012	-0.214361
11	-0.455009	-0.305822	-0.206283
11.25	-0.283669	-0.137975	-0.0448128
11.5	-0.48499	0.00129659	-0.218755
11.75	-0.414579	-0.198948	-0.236894
12	-0.492146	-0.0963654	-0.106187
12.25	2.98188	0.202151	0.00258386
12.5	5.99461	0.423135	0.0422838
12.75	7.90088	0.775464	0.647914
13	8.69211	1.02573	3.46352
13.25	7.8643	1.01182	6.19966
13.5	6.58315	0.930197	8.13491
13.75	4.778	0.729679	6.87632
14	3.21143	0.64801	5.07974
14.25	1.59895	0.457284	3.32578
14.5	0.168618	0.0164876	1.58998
14.75	-1.16096	0.212994	0.293922
15	-2.29851	-0.167067	-0.986883
15.25	-3.18127	-0.229702	-1.85103
15.5	-3.39452	-0.635177	-2.76147
15.75	-3.67407	-0.35134	-3.30806
16	-3.43289	-0.427869	-3.71041
16.25	-3.31337	-0.63513	-3.56826
16.5	-2.91089	-0.483674	-3.11405
16.75	-2.78967	-0.540368	-2.76944
17	-2.57653	-0.408472	-2.32626
17.25	-2.01698	-0.194531	-2.02039
17.5	-1.94295	-0.39346	-1.67539
17.75	-1.7057	-0.146338	-1.34776
18	-1.71075	-0.210455	-1.03787
18.25	-1.66031	-0.173759	-0.9444
18.5	-1.29596	-0.21944	-0.635338
18.75	-1.14561	-0.303769	-0.401591
19	-0.924754	0.0443827	-0.491059
19.25	-0.833405	-0.154442	-0.397098
19.5	-0.853385	-0.0388618	-0.465407
19.75	-0.825842	-0.0172589	-0.188549
20	-0.725498	-0.0919279	-0.237969
20.25	-0.593863	0.00146503	-0.0940258
20.5	-0.591176	-0.216495	-0.173018
20.75	-0.46225	0.0532717	-0.117558
21	-0.407502	-0.168513	-0.216611
21.25	-0.480581	0.0299776	-0.122661
21.5	-0.53037	-0.122688	-0.127674
21.75	-0.401678	-0.150625	-0.149172
22	-0.348071	-0.242603	-0.0527895
22.25	2.58322	0.172279	0.0434626
22.5	6.12667	0.613626	-0.101613
22.75	7.90854	0.792148	0.0324044
23	8.71721	0.991537	2.39009
23.25	7.82073	0.968277	5.26416
23.5	6.54708	0.854537	7.06659
23.75	4.61731	0.599678	8.53174
24	3.17561	0.469581	10.2532
24.25	1.80302	0.518019	11.009
24.5	0.382	0.286789	8.44197
24.75	-0.936493	0.163021	5.47978
25	-2.08459	-0.0555299	2.7437
25.25	-3.19138	-0.110222	0.438125
25.5	-3.55044	-0.412845	-1.78126
25.75	-3.52495	-0.563559	-3.46058
26	-3.4629	-0.466782	-4.59635
26.25	-3.21326	-0.382697	-5.25115
26.5	-3.02933	-0.431498	-5.65201
26.75	-2.55322	-0.455019	-5.60135
27	-2.39754	-0.47209	-5.30252
27.25	-2.39306	-0.504755	-4.63662
27.5	-2.1205	-0.422043	-3.90074
27.75	-1.7332	-0.103666	-3.27624
28	-1.50794	-0.228826	-2.71601
28.25	-1.57901	-0.184791	-2.33896
28.5	-1.48516	-0.187302	-1.95427
28.75	-1.3026	-0.142037	-1.72923
29	-1.06748	-0.207496	-1.37168
29.25	-0.883521	-0.212599	-1.11957
29.5	-1.01499	-0.0129	-0.921164
29.75	-0.768863	-0.301861	-0.741829
30	-0.694044	-0.367291	-0.584849
30.25	-0.85552	-0.0713052	-0.589431
30.5	-0.506593	-0.260762	-0.350574
30.75	-0.667787	-0.0718154	-0.393749
31	-0.669437	0.0153114	-0.239914
31.25	-0.537954	0.0635511	-0.178652
31.5	-0.325121	0.0596276	-0.212986
31.75	-0.246276	0.0851241	-0.0923135
32	-0.216063	0.0873036	-0.124897
32.25	3.04083	0.314201	-0.0784265
32.5	6.16056	0.488683	-0.0723609
32.75	7.88915	1.02615	-0.032131
33	8.56621	0.938128	0.0178555
33.25	7.69811	0.78672	-0.0705524
33.5	6.41656	0.790518	0.0693935
33.75	4.61639	0.416358	-0.14236
34	3.27498	0.367433	-0.068587
34.25	1.77892	0.274317	-0.00852418
34.5	0.283535	0.120566	-0.122721
34.75	-1.1017	0.0284394	-0.0912631
35	-2.06106	-0.0241775	-0.158043
35.25	-3.13744	-0.337106	-0.0692715
35.5	-3.23171	-0.315313	-0.142693
35.75	-3.35489	-0.302198	-0.0513558
36	-3.2885	-0.37577	-0.0176237
36.25	-3.30854	-0.14274	-0.0514582
36.5	-2.88184	-0.337805	-0.0952196
36.75	-2.76431	-0.337891	0.076527
37	-2.424	-0.343351	0.0304188
37.25	-2.37047	-0.244632	-0.0294248
37.5	-2.12535	-0.281819	-0.00420125
37.75	-1.82135	-0.438742	-0.0457869
38	-1.68606	-0.249846	-0.0165897
38.25	-1.53756	-0.266845	-0.0905674
38.5	-1.29681	-0.154972	-0.15884
38.75	-1.16599	-0.234159	-0.153897
39	-1.18251	-0.311949	-0.0610896
39.25	-1.01381	-0.0822037	0.0721155
39.5	-0.852218	-0.035152	-0.17871
39.75	-0.818139	-0.210579	-0.136403
40	-0.74212	-0.0298976	-0.0720329
40.25	-0.798688	-0.057772	-0.0672403
40.5	-0.791109	-0.140423	-0.0538736
40.75	-0.515178	-0.141721	-0.00322847
41	-0.487694	-0.0966108	-0.0287858
41.25	-0.384776	-0.0803049	0.0228941
41.5	-0.328506	0.113395	0.0312068
41.75	-0.441088	-0.140557	0.0431635
42	-0.298598	-0.00482295	0.227498
42.25	2.82029	0.327478	1.49528
42.5	5.88231	0.525068	4.26141
42.75	7.86462	1.01057	7.97664
43	8.48497	1.24675	9.25707
43.25	7.92572	1.16091	11.443
43.5	6.61558	1.07385	12.7517
43.75	5.00662	0.785083	10.443
44	3.29087	0.403271	7.24919
44.25	1.61977	0.406373	4.17008
44.5	0.4878	0.211924	1.18114
44.75	-0.964077	0.0268466	-1.29156
45	-2.23054	-0.278355	-3.226
45.25	-2.87867	-0.458811	-4.66411
45.5	-3.55425	-0.447843	-5.72311
45.75	-3.5685	-0.655683	-6.31848
46	-3.30425	-0.473286	-6.24285
46.25	-3.26966	-0.459793	-5.97365
46.5	-2.8128	-0.299774	-5.29855
46.75	-2.74326	-0.278603	-4.62586
47	-2.5163	-0.473945	-3.94993
47.25	-2.29853	-0.387678	-3.31984
47.5	-2.07001	-0.254075	-2.69715
47.75	-2.01383	-0.304109	-2.26573
48	-1.58829	-0.206732	-1.96949
48.25	-1.44591	-0.317798	-1.54238
48.5	-1.35717	-0.230672	-1.20723
48.75	-1.17791	-0.172476	-1.13111
49	-1.20438	-0.0389266	-0.854324
49.25	-1.14359	-0.0831389	-0.751382
49.5	-0.806984	-0.186616	-0.619784
49.75	-0.828966	-0.0230611	-0.511379
50	-0.699762	-0.148657	-0.487212
50.25	-0.369296	0.168004	-0.250141
50.5	-0.461627	0.073888	-0.237196
50.75	-0.704507	-0.0373933	-0.141138
51	-0.435461	0.0299607	-0.148734
51.25	-0.410634	0.147162	-0.0653793
51.5	-0.16413	-0.00690338	-0.122348
51.75	-0.415282	0.0349181	-0.0557218
52	0.00985497	-0.0285444	-0.0731902
52.25	2.48696	0.172826	-0.106374
52.5	6.01679	0.544129	-0.0244259
52.75	7.60121	0.728189	-0.0331256
53	8.41288	0.916438	0.00191701
53.25	7.77086	0.81219	0.0870652
53.5	6.35004	0.740164	-0.0113347
53.75	4.6447	0.455733	-0.0814756
54	3.22114	0.437688	-0.227913
54.25	1.83611	0.255021	-0.0852948
54.5	0.264723	0.0791106	0.00928932
54.75	-0.628292	-0.137571	-0.0916773
55	-2.19328	-0.277886	-0.203825
55.25	-2.93042	-0.3268	-0.264328
55.5	-3.31136	-0.329625	-0.0601314
55.75	-3.23476	-0.437328	-0.111426
56	-3.49269	-0.315949	-0.204473
56.25	-3.47115	-0.519101	-0.034695
56.5	-3.03059	-0.276604	-0.0202677
56.75	-2.82141	-0.284313	0.00275335
57	-2.57557	-0.362934	-0.0173606
57.25	-2.08283	-0.277312	-0.0173691
57.5	-2.10236	-0.258096	0.0302744
57.75	-2.02026	-0.294517	-0.0804426
58	-1.66203	-0.23498	-0.0132064
58.25	-1.5724	-0.112459	0.237631
58.5	-1.34523	-0.171807	0.0857763
58.75	-1.18332	-0.23935	0.0412755
59	-1.14146	0.0358827	0.171269
59.25	-0.978063	-0.0463441	0.0574594
59.5	-1.07453	-0.0760218	0.165457
59.75	-0.797964	0.0349944	0.178208
60	-0.486826	-0.0482603	0.111791
60.25	-0.514549	-0.12164	-0.0044298
60.5	-0.595556	-0.0842432	0.0373289
60.75	-0.606699	-0.0820708	0.0047935
61	-0.638645	-0.0673891	-0.112924
61.25	-0.612267	-0.19092	-0.231092
61.5	-0.247033	0.0990923	-0.112928
61.75	-0.435335	-0.179029	-0.15287
62	-0.221868	0.0862557	-0.0758601
62.25	2.78894	0.192465	0.00343042
62.5	5.79778	0.403744	0.0238967
62.75	7.56194	0.682373	0.0166611
63	8.25186	0.937727	-0.0875742
63.25	7.43999	0.75949	-0.0371941
63.5	6.1603	0.791277	0.00765456
63.75	4.68119	0.633334	-0.053354
64	3.30494	0.372385	0.0665102
64.25	1.76775	0.446824	-0.0735606
64.5	0.568264	0.198187	-0.00165381
64.75	-0.784065	0.0158877	-0.0326365
65	-2.11336	-0.378065	-0.162819
65.25	-2.88838	-0.318065	-0.0608912
65.5	-3.26874	-0.488735	-0.0522988
65.75	-2.94101	-0.275693	0.0342785
66	-3.35642	-0.46535	-0.0473098
66.25	-3.17202	-0.451899	-0.106652
66.5	-2.9303	-0.219165	0.0815495
66.75	-2.49228	-0.275813	-0.0336613
67	-2.44356	-0.307296	0.00567839
67.25	-2.30709	-0.344678	-0.12263
67.5	-2.01266	-0.233405	-0.0525865
67.75	-1.82021	-0.420106	-0.0771258
68	-1.75161	-0.296812	0.0180955
68.25	-1.62395	-0.438265	-0.00801971
68.5	-1.32482	-0.202318	-0.0100267
68.75	-1.26365	-0.381307	0.00170272
69	-1.46428	-0.0910804	-0.0203112
69.25	-1.14019	-0.0888224	-0.0479306
69.5	-1.0862	-0.168176	-0.0941329
69.75	-0.866195	0.0639	0.00322232
70	-0.773818	-0.14282	0.0779826
70.25	-0.743977	0.0429624	0.0495029
70.5	-0.492968	-0.0818673	-0.030031
70.75	-0.580239	-0.0187695	0.0868357
71	-0.45459	0.0917873	-0.0290402
71.25	-0.645598	-0.0916536	0.0474246
71.5	-0.555992	-0.18301	-0.0692409
71.75	-0.39047	0.0338913	0.000372742
72	-0.358778	-0.145146	-0.00329037
72.25	2.71593	0.0531256	0.0808182
72.5	5.88292	0.434122	0.0652269
72.75	7.47106	0.700234	0.0884749
73	8.21753	1.04954	0.183679
73.25	7.34159	0.652378	0.0679207
73.5	6.45953	0.729838	0.0795964
73.75	4.68556	0.634424	0.0458117
74	3.31883	0.54321	-0.0685633
74.25	1.79344	0.285948	0.0246778
74.5	0.531298	0.160258	0.182729
74.75	-0.421789	0.0768239	0.00914884
75	-1.77289	-0.0351343	0.00683626
75.25	-2.61826	-0.248304	0.0270802
75.5	-3.14844	-0.23101	-0.069433
75.75	-3.36934	-0.329956	-0.0410525
76	-3.22124	-0.294041	-0.0766025
76.25	-3.1191	-0.417977	-0.0535215
76.5	-2.83828	-0.345839	0.0490764
76.75	-2.60542	-0.353719	-0.0545502
77	-2.40581	-0.322262	-0.0139343
77.25	-2.33427	-0.353189	-0.0956295
77.5	-2.12289	-0.269444	-0.0626222
77.75	-1.86598	-0.311389	0.0121681
78	-1.78269	-0.375442	-0.0159983
78.25	-1.42161	-0.32946	-0.0956821
78.5	-1.70587	-0.16631	0.0701815
78.75	-1.30381	-0.160568	0.0129958
79	-1.27839	-0.154605	-0.0531959
79.25	-1.00994	-0.0447347	0.028872
79.5	-0.898259	-0.0873236	0.0193869
79.75	-0.808861	-0.203494	-0.0230289
80	-0.833343	-0.143537	0.100227
80.25	-0.662512	-0.024865	-0.0249526
80.5	-0.646787	-0.0512271	0.0564808
80.75	-0.383768	0.00707396	0.0736689
81	-0.420871	0.118258	0.0288948
81.25	-0.417629	-0.195688	0.0606654
81.5	-0.325877	0.120365	0.000975051
81.75	-0.380512	0.00118944	0.0411305
82	-0.392257	0.071094	-0.0447579
82.25	2.58479	0.247178	0.180015
82.5	5.71355	0.670308	2.23694
82.75	7.64978	0.882468	5.4573
83	8.2898	1.10814	6.39002
83.25	7.45885	0.881278	6.85675
83.5	6.02795	0.709299	7.01022
83.75	4.85843	0.802483	5.87802
84	3.28791	0.456387	3.91729
84.25	2.10796	0.50632	2.17757
84.5	0.513207	0.199354	0.465743
84.75	-0.586329	-0.142137	-1.01672
85	-2.10491	-0.232407	-2.14149
85.25	-2.70994	-0.314303	-3.01092
85.5	-3.03152	-0.472804	-3.41868
85.75	-3.35251	-0.578605	-3.79896
86	-3.2834	-0.511482	-3.66974
86.25	-3.35408	-0.584785	-3.47524
86.5	-2.94708	-0.328034	-3.16954
86.75	-2.85615	-0.589601	-2.56799
87	-2.50997	-0.325081	-2.18574
87.25	-2.49053	-0.376507	-1.7879
87.5	-1.9527	-0.13238	-1.53466
87.75	-1.78092	-0.11497	-1.2945
88	-1.42868	-0.0361344	-0.990554
88.25	-1.59132	-0.390391	-0.859381
88.5	-1.32773	-0.119678	-0.732511
88.75	-1.17657	-0.131124	-0.590098
89	-0.879224	0.0926026	-0.53097
89.25	-1.09205	-0.231345	-0.459347
89.5	-0.902654	-0.0596231	-0.31336
89.75	-0.692336	-0.0283734	-0.166694
90	-1.01214	0.0246481	-0.269621
90.25	-0.681202	-0.164194	-0.286394
90.5	-0.655327	-0.157585	-0.160734
90.75	-0.669279	-0.165507	-0.147779
91	-0.401364	0.142218	-0.218373
91.25	-0.393372	0.0281349	-0.0202943
91.5	-0.622931	-0.117274	-0.141538
91.75	-0.423169	0.0148467	0.0854706
92	2.56621	0.212906	-0.158178
92.25	5.53393	0.527507	-0.0475005
92.5	7.25274	0.674321	-0.00509158
92.75	8.06484	0.932092	0.110615
93	7.46148	0.828149	-0.0422981
93.25	6.20094	0.813927	0.00912577
93.5	4.7688	0.474223	0.0582435
93.75	3.22499	0.306507	0.091409
94	1.82601	0.152909	-0.0210097
94.25	0.780481	0.0833997	0.150231
94.5	-0.819764	-0.101936	0.0952462
94.75	-1.75536	-0.138182	-0.0206147
95	-2.67804	-0.252832	-0.0337431
95.25	-3.18798	-0.482605	-0.149475
95.5	-3.45449	-0.393527	-0.102294
95.75	-3.19895	-0.377867	-0.0728551
96	-3.26372	-0.273982	-0.155096
96.25	-3.07186	-0.381518	-0.274
96.5	-2.54885	-0.18905	-0.0966918
96.75	-2.65696	-0.184094	-0.108168
97	-2.31694	-0.148538	-0.142774
97.25	-2.13258	-0.326646	-0.175093
97.5	-1.99138	-0.0791095	-0.0498477
97.75	-1.67189	-0.232301	-0.0705852
98	-1.64653	-0.182243	-0.104304
98.25	-1.22618	-0.198131	-0.0237308
98.5	-1.20671	-0.063395	-0.0272418
98.75	-1.15634	-0.0500967	0.0186014
99	-1.23895	-0.274756	-0.0289031
99.25	-0.84601	-0.0388535	-0.0171156
99.5	-0.698435	0.0252587	0.0505956
