# Supplementary material for: Corticothalamic gating of population auditory thalamocortical transmission in mouse
Source: eLife. 2021 May 24;10:e56645. doi: 10.7554/eLife.56645 (PMC8186908; doi:10.7554/eLife.56645)
Supplement: Figure 2—source data 3. [file elife-56645-fig2-data3.xlsx]

## Sheet: Figure 2F
Time	Df/f
(s)	AC
0.25	-0.498397
0.5	-0.280242
0.75	-0.328989
1	-0.337917
1.25	-0.352748
1.5	-0.396098
1.75	-0.166771
2	-0.499229
2.25	-0.418249
2.5	-0.197996
2.75	-0.350771
3	-0.293172
3.25	-0.172344
3.5	-0.154791
3.75	-0.00376128
4	0.260874
4.25	0.623503
4.5	0.750484
4.75	1.01837
5	1.07059
5.25	1.05067
5.5	0.968348
5.75	1.00069
6	0.83626
6.25	0.627212
6.5	0.351049
6.75	0.201754
7	0.0855247
7.25	-0.126555
7.5	-0.286466
7.75	-0.315701
8	-0.396664
8.25	-0.473369
8.5	-0.432223
8.75	-0.619781
9	-0.506619
9.25	-0.469834
9.5	-0.508799
9.75	-0.503027
10	-0.315766
10.25	-0.434093
10.5	-0.475962
10.75	-0.511074
11	-0.430598
11.25	-0.348565
11.5	-0.299474
11.75	-0.339003
12	-0.484409
12.25	-0.395466
12.5	-0.42526
12.75	-0.45
13	-0.462694
13.25	-0.199958
13.5	-0.180046
13.75	-0.280956
14	-0.10387
14.25	-0.138308
14.5	-0.155936
14.75	-0.205917
15	-0.137543
15.25	-0.168089
15.5	-0.144644
15.75	-0.270336
16	-0.250367
16.25	-0.208282
16.5	-0.128161
16.75	-0.340841
17	-0.330837
17.25	-0.303402
17.5	-0.355803
17.75	-0.262765
18	-0.169741
18.25	-0.29175
18.5	-0.23287
18.75	-0.159618
19	-0.279758
19.25	-0.160838
19.5	-0.117514
19.75	-0.0990054
20	-0.210823
20.25	-0.138935
20.5	-0.0185553
20.75	-0.237998
21	-0.193178
21.25	-0.115003
21.5	-0.0927587
21.75	-0.135738
22	-0.19787
22.25	-0.0102892
22.5	-0.14943
22.75	-0.101189
23	0.0109534
23.25	0.193345
23.5	0.238697
23.75	0.531765
24	0.736888
24.25	0.893349
24.5	0.985203
24.75	1.09209
25	0.989409
25.25	1.04057
25.5	0.749888
25.75	0.6118
26	0.34572
26.25	0.170946
26.5	-0.0350676
26.75	-0.143825
27	-0.120438
27.25	-0.318208
27.5	-0.271703
27.75	-0.43563
28	-0.294779
28.25	-0.389261
28.5	-0.427288
28.75	-0.315346
29	-0.502061
29.25	-0.451482
29.5	-0.370686
29.75	-0.353714
30	-0.164906
30.25	-0.20986
30.5	-0.348638
30.75	-0.298956
31	-0.0505961
31.25	-0.136904
31.5	-0.237035
31.75	-0.374115
32	-0.212179
32.25	-0.304598
32.5	-0.238284
32.75	-0.213034
33	-0.00355311
33.25	0.0838026
33.5	0.527573
33.75	0.458062
34	0.772252
34.25	0.784971
34.5	0.817603
34.75	0.805873
35	0.71453
35.25	0.505551
35.5	0.313891
35.75	0.217087
36	0.041013
36.25	-0.03253
36.5	0.0114488
36.75	-0.314081
37	-0.494728
37.25	-0.312019
37.5	-0.377317
37.75	-0.319701
38	-0.454209
38.25	-0.402899
38.5	-0.392108
38.75	-0.326544
39	-0.367673
39.25	-0.373701
39.5	-0.27736
39.75	-0.351097
40	-0.254
40.25	-0.288166
40.5	-0.356507
40.75	-0.26092
41	-0.211218
41.25	-0.174491
41.5	-0.122171
41.75	-0.0181751
42	-0.144366
42.25	-0.176825
42.5	-0.214858
42.75	-0.104832
43	-0.141374
43.25	0.153938
43.5	0.114493
43.75	0.342533
44	0.430503
44.25	0.405305
44.5	0.38309
44.75	0.380082
45	0.282299
45.25	0.177073
45.5	0.175499
45.75	-0.123949
46	-0.0716727
46.25	-0.225366
46.5	-0.204408
46.75	-0.260141
47	-0.259828
47.25	-0.152983
47.5	-0.0688927
47.75	-0.288536
48	-0.121333
48.25	-0.238512
48.5	-0.41089
48.75	-0.221764
49	-0.113633
49.25	-0.333614
49.5	-0.258443
49.75	-0.0818359
50	-0.0525615
50.25	-0.276189
50.5	-0.0951626
50.75	-0.17781
51	-0.109749
51.25	-0.226694
51.5	-0.0074162
51.75	-0.202466
52	-0.119126
52.25	-0.0402503
52.5	0.213104
52.75	0.252117
53	0.315626
53.25	0.510041
53.5	0.708939
53.75	0.667634
54	0.778571
54.25	0.670075
54.5	0.651408
54.75	0.624862
55	0.409649
55.25	0.318956
55.5	-0.0149377
55.75	-0.0403317
56	-0.152373
56.25	-0.124478
56.5	-0.288369
56.75	-0.344355
57	-0.287677
57.25	-0.401892
57.5	-0.247788
57.75	-0.116818
58	-0.246588
58.25	-0.328173
58.5	-0.193618
58.75	-0.292502
59	-0.180148
59.25	-0.273156
59.5	-0.187423
59.75	-0.132015
60	-0.0548253
60.25	-0.113651
60.5	-0.32458
60.75	-0.173504
61	-0.17437
61.25	-0.0904496
61.5	-0.207078
61.75	-0.0310412
62	-0.136354
62.25	0.00303376
62.5	-0.00396678
62.75	0.219761
63	0.26622
63.25	0.380186
63.5	0.540217
63.75	0.729404
64	0.77396
64.25	0.561451
64.5	0.583972
64.75	0.210511
65	0.166464
65.25	0.0714978
65.5	0.0266184
65.75	0.0250264
66	-0.285314
66.25	-0.285397
66.5	-0.312406
66.75	-0.319765
67	-0.251864
67.25	-0.257344
67.5	-0.271658
67.75	-0.210429
68	-0.144523
68.25	-0.329215
68.5	-0.25764
68.75	-0.31204
69	-0.209273
69.25	-0.110874
69.5	-0.193207
69.75	-0.235506
70	-0.122227
70.25	-0.148682
70.5	-0.132237
70.75	-0.0848305
71	-0.0810106
71.25	-0.224712
71.5	-0.190806
71.75	-0.0895587
72	0.0719795
72.25	-0.0973774
72.5	-0.10362
72.75	-0.0624779
73	-0.181895
73.25	-0.11574
73.5	-0.0267551
73.75	0.0486145
74	-0.158548
74.25	-0.121092
74.5	-0.171227
74.75	-0.17313
75	-0.225288
75.25	-0.194735
75.5	-0.12804
75.75	-0.105242
76	-0.0801835
76.25	-0.10611
76.5	-0.0300179
76.75	0.138838
77	-0.0532768
77.25	-0.0115648
77.5	0.133923
77.75	-0.0725321
78	0.0132911
78.25	-0.10216
78.5	-0.129003
78.75	-0.120644
79	-0.186703
79.25	-0.164041
79.5	-0.034571
79.75	-0.130446
80	0.0807429
80.25	0.0663809
80.5	0.0131689
80.75	0.12666
81	-0.0516146
81.25	-0.0282006
81.5	0.0311291
81.75	0.0240799
82	0.142181
82.25	0.25889
82.5	0.424054
82.75	0.52217
83	0.659098
83.25	0.839781
83.5	0.62763
83.75	0.677322
84	0.633225
84.25	0.486638
84.5	0.157801
84.75	0.245389
85	-0.0372413
85.25	-0.0740633
85.5	-0.175184
85.75	-0.267027
86	-0.284975
86.25	-0.343134
86.5	-0.286057
86.75	-0.0846023
87	-0.147895
87.25	-0.209823
87.5	-0.282614
87.75	-0.284886
88	-0.112399
88.25	-0.163569
88.5	-0.175516
88.75	-0.30301
89	-0.266379
89.25	-0.237157
89.5	-0.152147
89.75	-0.142792
90	-0.208683
90.25	-0.0261128
90.5	-0.0354019
90.75	-0.0958791
91	-0.0147214
91.25	-0.0867574
91.5	-0.139041
91.75	-0.100312
92	0.0959636
92.25	-0.154751
92.5	-0.100743
92.75	-0.0800588
93	-0.121767
93.25	-0.167214
93.5	-0.0802478
93.75	0.0349518
94	-0.0726837
94.25	-0.193755
94.5	-0.263648
94.75	-0.102669
