# Supplementary material for: Corticothalamic gating of population auditory thalamocortical transmission in mouse
Source: eLife. 2021 May 24;10:e56645. doi: 10.7554/eLife.56645 (PMC8186908; doi:10.7554/eLife.56645)
Supplement: Figure 2—source data 4. [file elife-56645-fig2-data4.xlsx]

## Sheet: Figure 2G
Time	Df/f (Calcium signals) L4 cells
(s)	Cell#1	Cell#2	Cell#3	Cell#4	Cell#5	Cell#6	Cell#7	Cell#8	Cell#9	Cell#10	Cell#11	Cell#12	Cell#13	Cell#14	Cell#15
0.1	-2.77692	-5.26277	-8.77037	-5.6842	-1.85566	-10.4857	-5.8056	-4.04144	1.31199	-7.89277	-7.26359	-7.60198	-0.56848	-2.48678	-9.55653
0.2	-2.43794	-4.84792	-7.34403	-6.39651	-2.64179	-8.75045	-3.54706	-3.84916	-1.11509	-5.70322	-8.30106	-6.69062	-1.6668	-3.01681	-8.61761
0.3	-1.32397	-3.99592	-6.39901	-6.2542	-3.08855	-6.5848	-1.58293	-3.58272	-2.00149	-4.50626	-8.2869	-6.11747	-2.28237	-3.7131	-7.09772
0.4	-0.05593	-3.34341	-3.72096	-3.65092	-2.63488	-5.25909	-1.49588	-2.48323	-2.26564	-3.24041	-6.9154	-4.5487	-2.60561	-3.27489	-4.71672
0.5	0.97129	-2.56597	0.47686	-1.03638	-2.25819	-3.63355	-1.23188	-1.62434	-1.91414	-1.74451	-3.564	-1.62296	-2.75936	-2.22005	-0.60162
0.6	1.06489	-1.39986	3.21312	0.64532	-1.49218	-0.8881	-0.42239	0.28134	-1.63343	0.16245	1.33018	1.8282	-2.64145	-0.72491	3.37357
0.7	0.64601	1.5876	4.92023	2.71661	0.47044	4.24551	1.5465	2.25764	-1.79073	2.72335	5.99406	4.74843	-0.20437	1.69988	6.78478
0.8	1.00439	6.78738	6.49453	6.85466	3.86062	12.1005	4.29959	4.38518	1.58218	7.51818	10.4505	7.8501	3.48819	5.24167	9.02845
0.9	2.90818	13.0409	11.1296	12.8056	9.6402	19.2556	8.23964	8.65671	7.82634	12.6832	16.5562	12.155	9.24025	8.49497	11.4034
1	8.0032	20.8239	18.6639	18.0987	16.4072	24.9356	15.3397	13.5222	16.0761	19.2028	23.5941	19.2486	13.6407	11.5875	14.0527
1.1	16.8567	26.9426	26.0604	22.6541	23.0233	32.262	24.1538	19.3675	24.7191	27.376	30.7723	27.3402	18.3131	14.6245	15.7109
1.2	27.961	31.4531	32.7639	28.892	29.823	40.21	30.7646	25.6839	34.6372	38.0855	37.3815	34.9461	23.7006	15.6475	18.3321
1.3	39.5846	36.292	40.486	37.1847	36.863	47.409	36.1461	31.2603	44.5828	48.4926	42.6767	41.1075	28.6427	15.5005	19.9442
1.4	52.717	38.8597	47.3433	43.0656	42.8444	51.569	41.3418	35.6418	53.2723	54.7203	47.3404	47.2817	31.557	13.4522	21.2531
1.5	65.3952	40.1807	53.2157	46.4291	47.4083	52.879	45.057	39.0722	59.1895	56.0796	50.3554	53.7236	33.1218	10.8775	22.4607
1.6	74.6836	38.9978	56.341	48.2119	49.9878	54.445	43.8746	42.6357	61.8068	55.4618	53.1301	58.688	34.7915	10.4834	24.4216
1.7	80.9097	34.5549	55.5582	50.4475	49.5219	52.6241	38.8932	45.5077	62.3019	55.7689	55.7697	60.4668	36.5727	11.3761	26.0432
1.8	82.9127	31.7341	51.679	51.8501	49.2345	49.8724	34.4236	45.8541	61.6282	54.5545	57.5055	57.7618	37.6448	12.777	27.2256
1.9	81.4061	30.9103	46.7133	49.8463	48.0726	46.8386	30.7797	44.8642	59.6224	49.3906	57.4438	54.2135	37.1374	14.3687	25.8868
2	78.3234	29.3516	42.8363	46.61	44.816	43.1728	27.5816	42.1438	57.0942	43.9208	55.4782	51.3742	35.2616	16.618	24.1141
2.1	74.7669	28.2462	40.351	44.1055	40.9141	38.9804	25.0199	37.3065	53.8156	40.0369	52.0065	48.6585	32.9947	17.4201	21.695
2.2	71.5186	26.9429	37.3203	41.8892	36.9504	34.3984	22.8188	32.4575	51.0808	38.3891	47.4124	44.7548	29.0424	17.8932	19.6716
2.3	68.0774	26.8665	33.2971	39.7014	33.7869	31.3385	22.274	27.1738	49.5044	37.1023	42.2767	39.4444	24.1061	16.7767	17.0263
2.4	62.0978	27.2493	30.2984	37.8291	31.7704	31.746	22.6498	21.4417	48.1298	33.3888	35.9845	35.4506	20.4638	15.1747	13.3159
2.5	55.9196	28.0555	28.1858	35.7602	29.7247	33.0048	21.6814	16.7857	46.5746	28.3569	29.578	33.9853	18.4189	13.6178	10.2834
2.6	49.9652	27.3001	27.241	32.9395	28.7583	31.4095	20.9377	14.4987	43.1971	24.4636	24.0741	33.0196	17.747	12.5177	8.7116
2.7	44.7697	26.5367	25.3642	29.2443	29.63	31.0105	20.4179	14.5542	40.2823	21.5886	19.4231	32.4214	18.3621	10.9194	8.31606
2.8	39.2364	25.3662	23.5216	25.6853	30.1925	30.7598	20.0412	14.8864	38.15	18.9716	16.4206	30.934	17.8374	9.51882	7.36276
2.9	34.1334	25.9651	23.297	22.776	29.4901	30.2855	18.3226	15.2758	34.8281	16.3686	16.0053	29.2643	17.0886	8.06494	5.0527
3	30.529	26.0504	22.6646	18.3687	27.9378	29.5312	16.1007	15.025	30.0948	14.9697	15.2211	28.0408	16.2013	7.00554	1.81597
3.1	29.108	25.2875	20.5361	12.0339	26.6222	26.9508	14.5129	16.3142	25.2798	14.805	13.7047	26.8908	16.7908	5.99984	-0.96553
3.2	28.0534	24.8872	18.4959	7.09433	24.1363	22.9601	13.552	17.3691	22.0934	14.9148	13.8293	25.533	17.1803	4.86145	-3.11678
3.3	26.9509	24.3033	16.4791	5.1372	21.7028	20.2617	13.9418	16.5344	20.2958	14.9066	14.0235	23.6543	16.6912	2.71327	-5.41156
3.4	26.5719	23.1452	14.9447	4.47279	19.1568	19.2682	13.4182	15.5172	18.0398	14.1172	14.384	21.4695	15.7634	1.66718	-7.96357
3.5	25.9921	19.9844	11.53	2.8015	17.6108	20.1133	10.6974	14.8908	15.3262	12.6925	13.7575	19.6248	14.5615	1.72992	-9.38329
3.6	24.4673	15.3828	7.86682	2.14045	16.7035	19.5826	8.49528	14.5915	14.8117	11.1534	12.7578	18.6394	13.8014	1.87421	-8.63925
3.7	22.2896	10.3577	4.18358	2.55628	15.5888	18.2078	8.23109	15.1397	16.2962	8.98956	12.4026	18.5354	11.652	1.83096	-7.14172
3.8	21.3091	6.09988	2.7049	4.36685	14.331	16.6627	9.19453	15.8986	17.4577	6.8654	12.9432	19.4687	9.26531	1.44209	-4.8968
3.9	20.7681	2.63986	3.61617	5.39194	13.1233	15.3547	10.7312	15.9132	17.9453	5.75369	12.3448	18.7466	6.43777	1.53096	-3.0228
4	19.7866	1.27548	3.47457	5.26172	11.8345	16.669	9.81756	15.9436	16.8062	4.0149	10.7111	17.8319	3.89584	2.11727	-1.80194
4.1	18.3975	1.57748	4.41494	5.78381	11.1991	19.0947	7.67496	14.5687	15.7844	1.75411	7.67958	16.8399	1.76172	2.30358	-1.13821
4.2	16.7814	1.90973	6.05699	5.75669	9.98248	21.5842	6.90386	12.4427	15.3149	0.32477	4.63968	16.5294	-0.01916	1.81537	-1.78976
4.3	15.4528	2.29246	8.22413	5.71705	8.73886	22.2111	6.92439	10.552	13.8156	-0.60827	2.3052	15.8933	-0.34312	1.72022	-3.11969
4.4	14.3697	2.68134	10.5449	4.15968	8.33691	23.6945	4.95779	6.87394	11.6289	-1.51095	0.46814	13.3287	-0.44035	2.13258	-5.23841
4.5	12.362	3.57831	12.1801	3.1859	8.35218	23.2056	0.82824	2.63845	9.18259	-3.2334	-0.70152	9.71218	-0.81459	3.09188	-8.00351
4.6	10.8532	2.97639	11.5701	2.12644	8.15473	22.9141	-1.68955	-1.2277	7.7512	-5.88773	-1.36951	7.25169	-2.52087	2.79645	-10.4654
4.7	9.16738	1.01833	9.62797	0.7281	7.73705	20.2032	-1.22446	-3.27025	6.10366	-6.63743	-1.45733	5.5285	-4.41657	2.07041	-14.1548
4.8	7.54095	-1.09919	7.34246	-0.09449	6.44465	16.0401	1.02838	-3.39295	6.03174	-4.55414	-0.39521	4.26696	-4.45785	1.94693	-17.2318
4.9	5.8837	-1.73596	4.91264	0.03167	4.47425	8.84424	3.0425	-3.3467	6.49206	-2.00609	0.4685	2.28976	-3.11511	3.01365	-19.6729
5	4.58027	-1.65963	1.09831	0.47084	3.4776	2.68265	3.02977	-2.34116	6.9335	0.17763	-0.47465	0.06878	-0.3175	4.26164	-21.2979
5.1	4.28123	-1.75465	-1.47311	-0.01222	4.04204	-1.9213	2.1777	-0.14987	6.53254	2.88333	-2.48087	-1.05174	1.04819	5.11867	-21.2524
5.2	4.36569	-2.07951	-2.13051	0.69397	5.89036	-3.72862	2.55365	3.62191	6.77059	6.22313	-4.87473	-1.05111	3.55411	3.41108	-21.0536
5.3	4.10774	-2.45486	-0.85263	1.58997	6.72085	-2.59617	1.85839	6.40606	6.34921	9.03627	-8.09795	-1.14316	6.60604	1.06528	-21.7248
5.4	3.1821	-2.88047	0.99559	1.93118	6.92535	-1.71027	-1.08971	8.49673	4.60092	9.40528	-11.493	-0.31928	9.28242	-0.85419	-22.8126
5.5	3.25857	-3.5796	1.79852	1.87922	7.49053	-2.05607	-4.61827	10.5753	3.6946	8.32861	-14.5119	0.49458	10.0748	-2.9054	-22.6344
5.6	4.09519	-4.70358	1.90344	1.43028	7.85912	-0.49739	-5.49903	11.6523	2.32642	7.04173	-15.3753	1.77643	7.77223	-4.84113	-21.1787
5.7	4.46841	-5.57384	3.36255	2.21259	6.83807	2.7516	-4.40748	11.5925	0.28142	6.64703	-14.8034	3.93109	3.95252	-8.08986	-19.2383
5.8	2.40826	-5.89806	4.51888	2.88587	4.69033	6.53442	-2.63285	10.0674	-1.54173	5.66027	-14.1805	5.59066	0.50535	-9.87169	-18.4257
5.9	-0.62204	-4.64641	4.54554	3.01179	2.88432	8.11191	-1.53332	7.79324	-2.02281	3.96935	-14.5267	5.48151	-1.00216	-9.95544	-18.3272
6	-1.61502	-2.39714	3.4056	1.25716	3.43141	7.59165	-1.94937	3.80044	-2.19232	2.85881	-14.9492	5.05415	-1.88907	-7.8277	-17.2304
6.1	-2.36946	-0.79488	1.17804	-0.63699	3.66295	7.32943	-0.6459	-0.51651	-2.05011	3.29088	-14.9987	4.01534	-2.52062	-5.52078	-15.0576
6.2	-3.30423	2.11877	-0.87171	-2.38649	3.66207	8.39502	0.07767	-3.244	-2.4284	3.84674	-14.6621	2.77413	-3.08227	-3.59808	-14.0052
6.3	-4.31205	4.94356	-0.90032	-2.77477	4.48508	8.39815	-1.6006	-4.79013	-3.28477	4.08263	-15.0148	0.94127	-2.00228	-1.63403	-13.975
6.4	-4.18992	5.83208	-0.8651	-3.87368	6.52321	8.16623	-2.45989	-5.04031	-4.10423	4.35121	-15.3455	-0.56731	0.45605	0.1093	-14.8781
6.5	-3.16841	5.85847	-2.27236	-5.00695	8.47878	8.94244	-2.37189	-5.86191	-3.69036	2.40922	-15.5195	-1.34863	1.56337	0.43059	-15.0134
6.6	-3.27912	4.24058	-5.14192	-7.19544	8.16395	10.4238	-2.59882	-7.49303	-3.29256	-0.51719	-15.1865	-0.69554	1.34263	-0.3847	-14.9624
6.7	-3.21064	2.98946	-7.71187	-8.20358	5.9087	10.3684	-1.24841	-7.89238	-3.92785	-2.07498	-14.6482	-0.9417	-1.10174	-1.2903	-15.1385
6.8	-2.91274	0.41433	-8.80583	-7.03492	2.85659	9.80013	-0.34712	-7.98549	-4.69995	-3.35251	-15.0785	-1.89626	-2.06894	-1.88003	-15.6341
6.9	-1.33995	-1.84639	-9.22283	-6.11203	0.73311	9.10854	2.06309	-8.96646	-5.39389	-4.30541	-14.9935	-1.66106	-2.65224	-1.98345	-15.2591
7	0.15522	-4.32871	-9.82178	-5.5206	-1.45971	8.14638	6.70506	-9.52204	-4.84188	-7.49807	-14.2439	-1.80176	-3.82946	-2.82812	-14.0646
7.1	0.54671	-6.29512	-10.2442	-5.90846	-3.89303	6.29101	9.8666	-9.23789	-3.50654	-9.9422	-12.3454	-1.90811	-4.00957	-3.77403	-13.2152
7.2	0.73503	-6.9761	-10.7194	-6.20513	-5.31486	3.80465	11.1583	-7.62365	-2.143	-10.6125	-10.2774	-2.21867	-2.02798	-3.81357	-12.8963
7.3	1.94487	-7.70339	-10.4763	-6.48845	-5.53773	0.85026	10.471	-6.23834	-1.63041	-9.19483	-7.78843	-1.33189	1.04227	-2.71368	-12.5675
7.4	4.2915	-8.6624	-9.60362	-7.3717	-4.63187	0.28717	8.88225	-4.96303	-2.48825	-6.60473	-5.81008	0.44775	1.92423	-1.87005	-12.6028
7.5	6.31627	-9.89548	-7.80334	-7.93558	-2.99335	1.4823	6.65773	-4.57868	-2.45493	-5.4358	-3.86076	1.08748	0.22234	-2.12537	-13.1619
7.6	6.71917	-10.7862	-5.8722	-7.84696	-1.45121	2.06001	4.24808	-4.93824	-1.7292	-5.2186	-2.31418	0.58455	0.05553	-2.84039	-14.1804
7.7	6.42698	-11.0907	-4.45271	-7.04369	-0.6573	1.50633	2.82754	-6.27063	-1.6302	-3.60592	-3.41986	-0.40738	0.46432	-3.85739	-14.6859
7.8	6.6952	-8.44749	-5.33121	-6.02686	-1.10979	0.35403	3.33064	-7.6349	-3.09471	-1.4876	-6.74317	-0.91914	0.53949	-4.63124	-15.1886
7.9	6.64384	-5.61104	-5.92479	-4.06147	-2.18343	-1.16181	5.98414	-7.74218	-4.99918	-0.17737	-10.0755	-1.62177	-2.80883	-5.19844	-14.9699
8	5.57439	-3.57215	-6.09452	-1.92621	-3.77333	-2.10412	6.72824	-8.88146	-6.7547	0.46723	-12.6001	-3.07109	-7.64966	-6.06764	-14.9141
8.1	4.12144	-3.35868	-6.59711	-0.56116	-3.64479	-1.78236	6.91299	-8.82584	-7.22786	0.48475	-13.2639	-5.59775	-9.21548	-7.74091	-15.5199
8.2	2.93899	-2.13341	-7.60426	-0.73546	-3.57501	-0.92885	7.19352	-7.14056	-6.88843	-0.13416	-12.9325	-6.83584	-8.6402	-9.63462	-15.9602
8.3	2.68333	-0.77904	-9.26416	-2.41348	-3.92569	0.63401	6.14988	-4.54931	-6.24191	-1.15245	-12.7116	-6.62944	-8.0226	-10.0678	-15.2113
8.4	1.81133	0.67608	-9.60509	-4.65663	-3.48083	1.16785	2.93587	-2.68196	-5.76174	-2.25832	-11.9611	-6.32402	-8.83856	-8.93377	-13.9066
8.5	1.11511	-1.11481	-9.30549	-6.75286	-1.43638	3.09635	-2.67428	-2.16388	-5.5688	-3.02321	-11.257	-6.54773	-9.85059	-8.52817	-12.2931
8.6	0.37094	-4.36655	-9.47302	-9.1973	2.69923	3.78898	-6.483	-2.50448	-5.85196	-3.7951	-10.3105	-6.55475	-8.47656	-9.17493	-11.0131
8.7	0.29219	-5.16026	-10.1055	-11.1811	5.48176	5.3978	-6.64227	-1.78724	-7.30201	-4.0882	-9.66143	-6.3247	-6.11076	-10.6927	-10.0351
8.8	0.18718	-3.22794	-9.8998	-12.1732	6.9293	5.05201	-4.62416	-0.47547	-8.99839	-4.47941	-7.66323	-6.42408	-3.80756	-10.1121	-9.05908
8.9	-1.38561	-0.52182	-8.83518	-12.1174	8.21155	3.2238	-2.83698	-0.66483	-10.3499	-3.10962	-5.30088	-6.19954	-3.43535	-8.79661	-8.9491
9	-3.48114	1.28545	-8.90635	-10.5499	9.92118	0.08346	-1.77185	-1.1023	-10.5234	-0.28013	-2.97902	-6.99551	-2.97426	-8.58634	-8.43725
9.1	-3.5462	1.92597	-9.73471	-8.29631	11.1808	-1.67267	-0.07248	-1.83578	-9.33881	1.90241	-1.2705	-7.74798	-2.2325	-9.35174	-7.50738
9.2	-2.39343	2.0486	-10.2476	-7.16411	10.4762	-2.75705	1.36746	-2.52489	-7.93029	2.71985	0.69276	-8.50679	-0.75264	-8.90164	-7.45327
9.3	-1.24522	3.03983	-10.2696	-7.8936	7.54884	-3.25015	1.03313	-3.284	-7.25304	2.28778	2.2607	-8.81159	0.44323	-7.71202	-9.00203
9.4	-0.58095	3.25352	-10.4829	-9.37211	5.25524	-3.23657	0.09193	-2.7982	-6.71815	0.396	3.79559	-8.47275	-0.37775	-6.80794	-10.8101
9.5	-0.6015	2.81834	-10.3046	-10.5363	4.66201	-3.57714	-1.73631	-2.1393	-5.18749	-0.86635	2.50754	-8.90213	-1.07588	-6.4567	-11.5157
9.6	0.3835	2.1996	-9.56865	-11.4408	3.34273	-4.3805	-1.37518	-2.55926	-3.39323	-2.10067	-1.22726	-9.65881	-2.76982	-6.64891	-10.8678
9.7	1.33196	1.03702	-8.07041	-12.8387	2.01037	-5.1494	-1.459	-3.60001	-3.62841	-3.46696	-4.48848	-9.85939	-4.82633	-6.09026	-11.0895
9.8	1.34109	-0.52632	-5.76557	-13.3063	1.6225	-3.17493	-0.27927	-3.14067	-4.48358	-4.79353	-5.8424	-9.25802	-6.05018	-5.78789	-12.203
9.9	0.94504	-1.24724	-4.56033	-12.8033	3.17052	-1.06152	1.84395	-1.38852	-4.61393	-4.94417	-7.01053	-8.28678	-5.93033	-6.80432	-12.8598
10	1.35821	-1.55529	-2.53968	-10.666	5.50893	-0.11399	5.15545	-0.79524	-3.32644	-3.49381	-8.33636	-7.77683	-6.41137	-7.50318	-12.1765
10.1	1.01809	-1.96452	-0.34025	-7.82114	6.61255	0.35717	7.326	-2.06993	-1.64908	-1.80056	-9.98032	-7.44766	-6.91536	-7.26962	-10.5928
10.2	1.83074	-2.89382	1.06236	-3.98746	5.99097	0.86489	9.63187	-3.40232	0.28928	2.11261	-10.9498	-6.4681	-5.68081	-6.24901	-9.17573
10.3	2.75866	-4.04287	2.47916	0.0129	6.75155	3.09948	11.9102	-3.35024	1.14431	4.656	-10.9666	-4.21823	-2.66708	-5.21641	-8.30988
10.4	2.9972	-3.42082	3.47285	4.10529	8.47632	6.43727	15.0278	-1.8237	2.66929	7.75057	-11.1942	-0.39199	0.31568	-3.92916	-7.38687
10.5	2.99835	-0.76363	3.96518	7.7727	9.07867	10.219	18.4248	0.93296	4.79778	10.5275	-10.0236	4.65445	1.26454	-2.06073	-5.56043
10.6	4.35085	4.27932	5.58106	11.5264	9.91403	12.8893	20.1761	5.17908	8.42557	14.262	-6.5874	10.0419	2.13418	1.5206	-2.35511
10.7	6.52057	9.6444	8.21753	16.3386	11.4071	16.4548	20.4458	9.53123	12.978	17.3379	-3.942	14.5383	6.59047	4.8489	1.47012
10.8	8.37185	16.2808	10.3771	22.6677	14.8749	20.1791	21.3091	14.3894	19.0473	20.2141	-0.88051	20.0589	12.8892	7.58262	4.41193
10.9	11.6738	24.0961	12.3011	29.8554	20.3634	22.3939	23.2567	20.0187	25.7227	22.1491	2.84496	26.5987	19.0914	10.7518	6.76989
11	16.4321	32.1169	14.1381	36.5002	26.04	24.7925	24.7814	25.2071	31.8265	24.731	7.66903	33.8399	25.6546	13.6846	9.68629
11.1	24.9261	39.8032	17.2889	42.7917	32.6097	27.773	23.7469	30.4025	37.4412	28.7726	13.184	40.7645	33.3031	17.1866	12.9267
11.2	36.6912	46.1092	22.7001	49.209	40.4201	30.0013	24.8498	36.6297	42.2379	35.3646	20.0427	47.8729	41.7216	19.7154	15.0419
11.3	47.7761	51.742	30.3363	55.3664	47.8743	32.7771	29.3713	42.3613	46.8737	42.9072	25.4294	55.0648	48.336	21.8033	16.2999
11.4	57.3783	58.4651	37.1654	61.9434	55.1156	36.0647	37.0514	48.085	51.3627	48.6538	29.7906	61.5618	51.0175	24.049	18.0479
11.5	66.4715	62.6215	43.447	67.25	59.909	40.7856	42.378	52.6851	52.752	53.4509	34.0128	66.2837	50.0697	25.9547	20.2889
11.6	74.332	61.1544	49.406	69.3713	62.3662	44.7711	44.1777	56.6012	52.1893	57.3793	35.9277	68.0954	46.4484	27.0436	22.3167
11.7	78.2868	56.4372	53.5238	68.4717	63.0267	49.4723	47.18	59.8089	51.6115	58.5038	38.3661	68.0532	42.5884	28.4933	23.7904
11.8	78.8096	53.4552	55.1116	67.2483	62.2012	52.9824	50.613	59.9357	50.5072	57.8581	39.4063	66.3449	39.5065	30.3469	24.3565
11.9	76.2712	52.6292	53.9819	65.7141	60.8955	56.8394	52.6598	56.1817	47.7149	53.7896	39.1311	61.9086	37.1837	31.2056	24.4213
12	71.9374	52.3876	51.6658	62.2398	58.4107	60.1386	50.9994	49.8932	43.6388	47.2361	38.2529	55.1744	35.7478	31.5587	23.8232
12.1	67.8582	50.2339	48.2386	56.641	53.2749	59.2527	47.1426	44.191	39.9325	40.7784	37.6328	48.4927	35.1049	32.344	22.4713
12.2	63.9377	47.8262	43.2134	50.2863	47.2874	57.5529	44.5843	39.8736	37.7931	36.1751	36.409	43.1469	35.2064	33.226	20.5944
12.3	60.2602	48.7629	37.2973	46.933	42.958	56.7882	42.4498	34.8317	35.1279	32.6367	36.0686	38.0163	35.0293	32.846	19.3071
12.4	57.9741	51.8152	33.67	47.2265	40.7373	57.1977	40.4511	28.8253	32.3617	30.2183	34.7995	33.6708	33.1706	30.1528	18.0836
12.5	56.6239	51.9177	32.0033	48.8117	38.1135	56.9491	38.6221	25.237	32.2495	28.1303	31.3867	30.3445	30.3263	26.6195	16.9299
12.6	54.3948	49.4996	30.595	48.948	33.2542	55.1878	38.0641	25.0744	33.3066	26.8738	26.1313	28.7636	27.9954	23.7662	16.4065
12.7	51.4786	45.3832	28.3198	48.4914	27.6758	53.5977	38.7367	25.6385	32.8327	27.3947	20.2827	28.8991	26.021	20.5833	15.7009
12.8	47.6311	42.059	26.722	48.137	25.0886	52.2992	39.9761	25.2216	30.224	27.9727	15.3412	29.6882	25.5585	16.7391	14.4244
12.9	43.1638	39.7969	27.026	47.6488	25.1597	48.7786	40.8522	23.3366	26.1995	27.6247	11.648	30.3728	25.2932	13.4808	12.9268
13	39.3882	38.7378	27.2924	48.6968	25.0631	43.1279	40.4297	23.4543	22.6236	26.374	9.81412	31.7728	26.537	12.8225	11.537
13.1	36.4561	37.7231	26.5229	47.7397	22.6189	37.1303	39.3938	26.247	20.2605	25.8859	9.32958	33.8253	26.3529	12.5595	9.80433
13.2	33.5182	37.9518	25.3223	44.5569	18.9114	30.0577	35.6294	28.2499	17.1735	26.6543	11.6481	34.9693	25.923	12.1559	8.27234
13.3	30.6877	36.9633	25.1054	39.5999	16.1299	24.0445	29.0326	27.9548	12.4105	27.6831	16.3148	34.2957	23.965	11.2926	6.74365
13.4	27.5695	34.9713	23.8698	35.3001	15.7515	19.3528	21.4256	26.2722	8.70362	27.613	20.9851	30.8752	21.2533	11.2143	6.11846
13.5	25.1829	31.9897	21.1881	31.4474	15.876	16.7954	15.0535	24.1305	8.62027	25.8474	23.1882	27.2505	19.3255	10.6046	6.4234
13.6	24.0849	27.1763	18.9307	28.2588	14.9998	16.3169	11.622	22.1571	10.6109	24.4939	21.722	24.1954	16.7862	9.02263	6.23503
13.7	23.0394	22.3086	18.8437	23.7183	12.9604	17.5141	9.54235	20.481	12.2546	23.3787	18.8494	22.1131	14.386	5.49576	4.7939
13.8	21.0329	19.2321	18.9104	19.2376	10.8107	19.2817	8.30864	18.8228	13.5376	21.4683	15.4302	18.9716	13.2856	2.90053	3.0246
13.9	17.739	17.0622	17.8272	16.9482	10.8609	21.2123	10.6037	16.5542	13.0516	18.6458	10.9891	15.08	13.3637	0.98886	1.42094
14	14.6573	14.2937	16.0572	15.8071	12.031	21.5362	14.7954	15.4922	13.3229	14.5948	4.87738	12.3227	12.7808	-1.35637	-0.88124
14.1	12.6907	12.1116	14.1951	14.372	12.6332	19.3058	18.1607	16.6902	14.5544	11.7268	0.09343	12.4734	11.6475	-4.28828	-2.51127
14.2	11.2492	9.30092	13.0791	13.2419	11.1346	17.6228	18.2703	18.1103	12.8736	11.276	-3.59651	13.1441	11.9971	-6.26612	-4.15403
14.3	8.84666	8.33992	11.687	11.0043	9.00155	15.0288	17.4662	19.3298	9.38507	11.916	-4.29105	13.9041	11.8706	-6.71953	-5.04572
14.4	6.73515	7.86856	9.67884	7.48994	8.03045	10.8762	17.3514	18.8698	6.5378	11.283	-4.56833	13.4183	9.83142	-6.2107	-4.99556
14.5	5.25024	5.43243	6.23161	3.23128	7.42796	6.58144	17.3113	17.2481	4.23118	9.83619	-5.52505	12.8704	6.37533	-5.12763	-4.26739
14.6	4.79598	2.26671	2.17345	-0.58012	7.91131	4.95067	15.5562	15.2535	1.10495	8.21534	-6.88357	12.6208	3.09902	-4.10444	-4.00633
14.7	4.35428	1.32761	-1.7392	-2.73849	8.15827	4.78666	11.8889	14.0063	-2.79709	5.36016	-7.18208	12.1786	0.2718	-2.64771	-3.94221
14.8	4.26069	2.86698	-4.25119	-3.11934	7.79099	5.84179	9.51289	13.6326	-5.2615	2.65912	-7.30318	10.577	-2.10867	-1.65779	-4.5486
14.9	3.6706	4.45869	-6.37211	-2.36758	7.54769	5.59943	6.68149	13.1089	-5.94373	-1.43388	-6.52847	8.76079	-5.6118	-1.53992	-5.19445
15	3.47657	4.54932	-8.27096	-1.4714	7.40724	7.33152	2.65572	13.398	-5.63054	-5.08314	-5.09439	7.62447	-9.2231	-2.70056	-6.62066
15.1	2.70387	4.41657	-8.5664	-0.61318	7.94244	9.48881	-1.69069	15.3306	-5.62486	-6.99009	-4.37563	7.49531	-10.5192	-3.6707	-7.99831
15.2	1.02266	4.83987	-7.59398	-0.2446	8.52143	12.0253	-5.1571	16.4394	-5.65306	-8.29332	-5.13758	7.37134	-9.29835	-3.98952	-8.82715
15.3	0.05136	5.61785	-6.38018	0.90329	7.90439	13.9799	-7.03171	16.5944	-3.46704	-8.30266	-6.89403	6.90402	-7.45893	-4.77735	-8.50303
15.4	-0.94162	4.51378	-5.73549	0.3324	7.15777	13.8629	-9.34215	15.8755	-1.60937	-6.87565	-8.7704	6.91836	-6.6952	-5.23704	-7.86454
15.5	-2.26902	2.45268	-4.78533	-1.89068	5.42815	12.6469	-10.4787	15.5928	-1.30754	-4.81222	-11.4845	7.96102	-6.82738	-5.4243	-8.24474
15.6	-4.0678	-0.45284	-2.42449	-4.7298	4.3238	9.38956	-9.22146	13.5922	-3.24829	-3.47747	-14.9999	8.30287	-5.83959	-4.71689	-9.13317
15.7	-5.26166	-2.88907	-0.65257	-6.28656	2.944	6.33907	-6.40279	10.1908	-4.37974	-1.31711	-18.5542	6.36767	-1.15729	-3.63895	-9.66845
15.8	-4.9455	-4.27744	0.05131	-6.78638	0.926	1.63691	-3.62537	5.26136	-5.40049	0.31659	-20.0862	3.47795	2.29718	-2.4478	-9.94512
15.9	-3.44119	-5.59717	-0.29819	-5.94618	-0.09094	-2.70273	-2.22573	1.47771	-6.76972	1.52172	-18.8968	1.3495	4.1589	-2.53697	-10.5813
16	-1.58763	-6.40893	-0.36055	-4.18501	-1.55743	-6.21603	-1.46699	-1.01939	-8.49374	3.16944	-17.422	1.13156	5.04849	-3.2266	-11.9484
16.1	-1.21098	-7.40412	0.15769	-3.35882	-3.22681	-8.79746	-0.1485	-2.81112	-9.57756	4.74942	-16.6235	0.2362	6.57466	-4.1533	-12.3608
16.2	-0.90966	-7.73857	-0.14704	-1.62436	-5.58006	-8.63448	0.26166	-2.93944	-9.82031	5.05654	-15.3661	-0.47282	9.13191	-4.32963	-12.054
16.3	-0.57068	-6.45919	-0.87733	0.84385	-6.53735	-6.56495	-0.27205	-3.14463	-9.44594	5.45591	-13.002	-0.60011	9.34803	-5.37715	-11.8462
16.4	0.69623	-3.8097	-1.97179	2.35607	-6.07017	-3.36506	-1.48865	-2.72425	-9.27166	5.91835	-8.23501	1.11726	7.17636	-7.23978	-12.1864
16.5	1.04434	-0.06187	-2.26405	1.58796	-5.21543	-0.60081	-2.70393	-1.28499	-8.96731	5.60539	-4.41179	3.31963	5.30766	-7.97893	-13.0938
16.6	-0.90966	2.5698	-2.0882	0.0982	-4.77278	2.21149	-2.90825	-0.20195	-8.88151	3.80353	-2.43154	4.86922	5.31666	-7.81059	-13.9265
16.7	-3.25629	5.24776	-1.60346	-1.54125	-4.14752	5.73524	-2.30821	0.85901	-9.55637	0.20799	-1.63925	6.02524	5.31731	-7.19862	-15.0467
16.8	-4.44901	7.2729	-1.59588	-1.70812	-3.37652	7.00558	-1.57931	0.93004	-10.5298	-2.32488	-1.12176	6.33819	5.17045	-7.91753	-16.6506
16.9	-4.67157	7.34538	-2.16793	-1.28907	-1.35882	6.23669	-2.50873	0.43154	-11.9509	-4.12441	-0.382	4.76605	4.75826	-8.79651	-18.6944
17	-5.60635	6.13649	-3.0929	-2.0139	-0.02367	2.34835	-2.29681	-1.15	-11.4784	-5.0049	0.05394	2.59065	4.35507	-8.12408	-20.1926
17.1	-8.48371	4.50651	-4.67161	-3.70849	0.47231	-1.32792	-2.66345	-2.21866	-10.5962	-6.91886	-1.10427	-0.90365	4.34071	-6.09036	-20.196
17.2	-11.3713	1.77817	-6.29482	-4.05881	-0.52831	-3.98666	-3.09927	-2.54989	-10.1264	-8.57591	-3.84646	-2.99245	3.70478	-4.79065	-18.9662
17.3	-13.3801	-0.26324	-7.55656	-3.92775	-1.84112	-7.81754	-4.73174	-3.17192	-10.1541	-7.77133	-5.55345	-4.7722	1.91028	-4.76413	-17.2378
17.4	-14.1574	-2.77019	-8.1609	-3.88194	-2.66221	-11.5492	-5.35477	-3.72542	-9.64723	-6.63509	-5.96612	-6.83631	0.00825	-5.16727	-14.9612
17.5	-15.43	-4.57184	-8.36096	-3.99881	-3.18639	-13.0295	-5.78546	-4.12851	-8.5573	-6.51949	-5.57906	-6.23847	-2.82164	-5.42477	-13.3415
17.6	-16.996	-4.74715	-8.68771	-5.12998	-4.61292	-12.4194	-5.22591	-3.98873	-5.97453	-6.8161	-5.36882	-1.49235	-6.25713	-5.16765	-12.3245
17.7	-18.2514	-5.75862	-9.10714	-6.28936	-6.26246	-8.23228	-4.44037	-3.18338	-5.53877	-7.11037	-5.25444	3.66403	-8.15616	-5.98199	-12.2225
17.8	-16.9628	-7.33615	-9.59947	-7.1389	-6.9647	-4.1256	-3.02001	-1.79766	-7.00882	-6.82194	-6.20313	8.46296	-9.097	-7.16991	-12.6609
17.9	-15.0408	-7.43062	-9.8795	-6.79558	-6.82896	-0.36158	-1.27882	-0.71754	-7.69764	-6.71684	-6.71472	11.997	-10.3688	-8.30944	-13.4951
18	-12.5572	-7.71646	-10.9659	-5.55991	-5.53599	3.6657	-0.19906	-0.50255	-7.74142	-6.54868	-7.26125	14.5714	-11.8919	-7.98949	-14.2968
18.1	-10.9102	-7.61122	-12.1601	-5.20324	-4.68096	9.68626	-0.06031	-0.94814	-6.82683	-5.57243	-8.2319	15.9909	-12.7399	-6.52486	-15.7093
18.2	-10.1044	-8.32015	-12.9117	-5.69671	-3.05067	12.1653	-0.09301	-0.7092	-7.08438	-3.89436	-9.09808	14.3879	-13.4178	-5.07316	-16.5652
18.3	-9.20961	-9.30335	-12.2758	-4.93094	-1.12215	11.4539	-0.45489	0.07782	-8.44898	-1.56817	-9.99519	10.8616	-12.7609	-4.15083	-16.342
18.4	-8.09108	-9.79298	-10.4687	-3.61506	1.20863	8.00221	0.25386	0.77485	-9.47274	0.96704	-10.9492	6.96862	-10.3372	-2.84761	-14.6866
18.5	-8.09679	-11.1915	-8.25408	-0.83384	3.96884	4.5328	0.68246	1.18794	-9.71451	2.99777	-11.9846	4.65658	-7.51302	-1.37082	-13.2468
18.6	-7.69731	-12.1891	-6.92435	2.14395	5.80114	1.70273	3.02216	3.489	-7.85276	5.21886	-13.1958	5.25473	-4.12983	0.05902	-12.7134
18.7	-6.32312	-12.5926	-5.56991	4.74915	8.09607	-1.5076	6.48059	6.53501	-6.46684	7.38506	-13.9065	7.1323	-1.06923	1.40549	-12.0545
18.8	-3.8829	-11.3378	-3.60356	7.87686	11.3161	-4.3126	9.46024	7.87886	-5.71529	8.75718	-13.6964	9.04053	1.3642	2.99065	-10.4096
18.9	-0.34926	-10.1332	-1.67194	12.5573	14.1943	-3.25537	11.2461	8.64692	-3.29943	9.22662	-11.9027	9.84259	4.79945	5.5566	-7.97022
19	2.57718	-7.6509	-0.65061	17.2964	16.9698	2.72339	11.5247	7.73575	0.48853	10.1363	-9.05602	10.4344	8.07057	9.15134	-6.85544
19.1	5.25823	-3.59292	0.86255	20.9496	18.9934	8.41069	11.2647	7.16496	3.53562	11.3379	-4.89768	10.3704	9.80653	12.0758	-6.69109
19.2	7.22365	1.87938	3.60517	23.1156	19.528	13.211	11.6042	7.64221	6.18771	12.4018	-1.22992	9.371	8.53645	13.4209	-5.18542
19.3	8.38897	5.19743	5.93911	25.0197	18.7983	15.2169	11.0625	8.41569	8.1295	12.8875	2.30303	8.53048	6.54327	14.5331	-3.31845
19.4	8.33077	7.43956	8.38873	26.8101	18.119	14.5848	10.1525	8.04385	9.16603	13.6968	4.31881	7.67624	5.50326	14.8727	-2.17019
19.5	7.52611	10.0687	10.213	28.7049	17.941	14.0395	8.02943	8.76525	9.33133	14.5037	4.35163	5.79935	5.9384	13.9982	-2.61595
19.6	5.35525	12.8228	11.5398	30.056	18.5307	14.5221	7.64702	10.3637	7.91692	14.2211	3.81196	4.78341	7.81975	12.1964	-4.60424
19.7	3.57473	13.8842	11.0421	29.6913	18.0777	13.9455	8.4107	11.9002	6.81991	13.176	1.93311	5.77622	8.69499	10.5175	-5.78989
19.8	3.07367	12.5802	8.93119	27.6661	17.0728	14.4971	9.42052	12.5229	8.06194	11.5972	0.19366	8.54529	8.93932	9.06949	-6.59076
19.9	3.96051	11.2142	6.71146	26.2602	16.8624	16.67	10.2271	11.9725	10.2687	9.95764	-1.14633	10.4944	8.91167	8.979	-7.97468
20	3.88176	11.0252	5.46562	25.8115	17.9767	19.8908	9.74496	11.5861	11.9037	8.55632	-3.18371	10.3166	8.94362	8.17958	-9.95977
20.1	2.80317	11.2415	5.09094	25.7129	18.0637	23.4814	8.1161	11.5773	12.0794	6.76848	-2.7067	9.42246	9.02885	7.17436	-11.7285
20.2	2.37973	10.138	4.53185	25.4355	16.6306	25.5666	7.39461	12.7797	12.2854	6.49172	-0.23127	9.47381	9.65107	6.50355	-13.068
20.3	2.91046	7.7851	4.33448	25.5952	14.9279	25.0484	6.76835	14.6425	12.6228	8.46057	2.07192	10.8207	10.5696	6.18729	-12.3489
20.4	3.05884	6.9817	4.63946	27.0601	15.2533	21.6417	7.60901	18.0503	12.1583	9.82451	3.56241	12.0299	10.7924	6.10564	-10.3115
20.5	1.95629	8.44671	5.04593	30.4039	17.0601	20.434	10.0717	21.0291	10.304	10.1235	4.37003	11.7538	11.4523	8.06617	-8.86459
20.6	0.54329	11.5935	7.02085	34.9999	20.4128	21.3398	13.9783	22.5948	7.77478	12.2523	6.88923	12.5222	14.3016	11.0346	-6.87109
20.7	0.20773	15.9471	9.97257	39.5228	23.4583	25.9124	18.6486	24.0234	5.7918	15.8268	10.5294	15.4364	18.94	15.3053	-4.27146
20.8	1.3662	20.6008	14.2538	44.6363	26.8793	32.5514	25.8298	26.3238	5.81965	20.7443	13.521	19.37	27.2979	21.1599	-1.07275
20.9	2.54865	26.5637	21.0861	51.0361	31.3714	40.0136	35.7187	29.5284	9.52967	26.7606	15.0284	23.0562	35.3199	28.112	2.55863
21	4.23672	32.7135	29.829	57.4105	36.294	48.8642	45.9406	33.5354	15.7223	32.7827	17.1094	28.3732	41.9823	35.37	6.24151
21.1	7.33436	38.3354	40.6215	62.8839	41.9554	58.1202	55.1739	39.7215	22.5929	38.9648	21.0917	35.2115	47.438	41.1585	10.2708
21.2	10.9741	44.53	50.2314	69.0303	46.4118	66.2155	61.4339	48.2227	28.1924	44.8492	26.5223	43.022	52.715	44.0899	14.7496
21.3	14.2441	50.0099	56.8669	76.599	49.5819	70.6889	64.3927	58.7471	34.2724	50.9122	31.6836	51.6844	57.4576	45.0802	19.2679
21.4	18.5185	55.4014	61.0906	85.0671	54.0953	73.9629	66.1445	67.4887	40.5613	57.1656	35.4952	59.2733	60.8209	45.2931	23.0517
21.5	22.2097	60.2932	62.5808	91.7404	59.2947	75.8026	66.8107	74.0665	46.0016	61.519	38.568	65.4745	62.5162	44.767	27.437
21.6	25.652	63.4182	60.564	96.5762	63.2337	77.8168	66.1801	80.2408	50.1325	64.0017	41.3425	71.5172	62.1996	42.8896	31.5529
21.7	28.2406	65.5763	57.254	100.095	65.6197	80.8924	63.852	85.2916	53.2717	65.417	43.6998	75.6932	60.7155	40.5056	33.9477
21.8	29.9766	68.6009	55.114	101.822	66.1784	82.6454	62.0767	86.9642	53.4127	66.4096	44.5167	75.7948	60.1293	38.2343	33.1236
21.9	30.9411	71.2547	53.6752	103.189	65.2845	82.6684	61.8715	86.9913	52.5916	68.1402	42.3303	75.5428	59.1892	36.5894	30.3185
22	32.1429	71.5231	53.3272	101.313	63.5569	82.9995	60.7457	88.4755	52.2135	68.4812	39.3055	74.8928	57.4813	35.2635	27.1059
22.1	32.6668	69.1703	53.9523	96.0849	59.7414	81.5066	58.5501	89.8235	52.921	67.4933	38.9791	73.6456	53.6206	33.6268	24.0359
22.2	32.4351	63.9964	55.4904	89.1912	54.4254	75.0682	55.8371	89.8492	54.6871	66.6688	39.6428	71.1579	49.4227	31.0252	19.2427
22.3	31.0677	58.7095	56.4626	82.7949	49.288	66.133	52.0538	88.6897	55.1009	65.9331	39.7601	67.1115	44.3951	27.8388	13.4639
22.4	29.0806	54.662	56.3459	76.5963	44.3793	57.3283	49.1915	85.4712	54.3622	63.4224	39.2612	63.1439	40.6782	24.0391	8.92797
22.5	26.823	50.9934	55.3828	70.5695	39.9648	49.7648	45.9797	82.8676	53.3299	59.1917	38.0589	58.9536	39.2282	21.619	7.12921
22.6	24.7743	47.0487	54.248	64.6139	36.8332	44.1496	41.2796	78.834	51.5655	54.3665	37.6739	54.0208	38.6085	19.5308	7.91239
22.7	21.3925	42.892	52.1442	59.6903	34.5961	38.0172	36.0815	72.4185	48.4105	51.5346	38.2456	47.9006	39.1237	17.9016	8.90162
22.8	16.4903	40.4963	48.1557	58.3922	33.1026	33.5846	32.0164	66.3504	44.2895	48.753	36.5198	41.94	38.7541	16.5071	10.0479
22.9	11.6087	41.0065	43.2565	57.7641	32.4941	32.3059	29.5613	62.4512	37.8671	45.8184	33.0346	36.8209	36.3417	16.8016	11.8089
23	8.5111	41.4483	39.6787	56.141	32.5135	32.9787	27.3935	61.1638	30.5038	42.4296	29.6745	34.5168	32.6066	18.3386	12.9477
23.1	7.55008	39.0528	36.6521	53.3944	31.9004	31.8535	25.0752	59.6606	24.2733	39.1213	27.4107	32.3486	28.3354	19.6313	13.0556
23.2	7.4816	34.5294	33.3849	51.496	30.446	29.362	22.34	56.3593	19.8157	36.3584	25.8843	30.6412	24.1628	20.0216	12.069
23.3	6.81733	30.1955	30.3113	49.8974	28.1471	27.2642	19.9397	52.9928	18.0784	33.2171	23.4673	29.621	19.6895	18.9983	11.0966
23.4	6.14278	25.6642	28.1537	46.6109	25.9141	27.6267	17.4287	49.9163	17.999	28.9361	21.4435	28.9034	15.6861	17.7635	10.2269
23.5	6.1873	20.0065	26.5919	41.2035	24.0959	25.9051	14.6169	47.4826	17.7714	23.5469	20.4583	28.2954	12.2752	15.9999	9.10798
23.6	6.98396	15.7294	25.4233	36.0349	22.4928	24.4185	11.9695	44.1272	16.4771	18.0292	19.7084	26.9433	10.2593	13.8331	7.5745
23.7	6.99424	12.1011	22.756	31.0189	20.4639	23.0479	9.02271	38.5999	14.457	12.9389	19.1768	23.3644	10.0929	11.3527	7.43299
23.8	5.20116	10.3266	19.9056	27.5962	17.4817	24.5313	7.0523	34.4928	13.7615	9.82685	16.8222	20.0931	10.2007	9.6635	7.87645
23.9	2.34092	10.4038	16.4447	24.5977	13.8303	25.5509	4.61814	33.3343	14.4184	7.60693	13.604	18.5322	8.61398	8.59906	8.6427
24	0.56497	10.7268	12.5795	22.7955	11.1795	24.2043	3.41294	33.0541	14.1506	5.60656	9.48495	17.5235	5.01865	7.78433	8.04612
24.1	-0.2511	11.0497	8.45305	20.3216	10.0479	19.8793	3.83241	31.3268	10.7246	3.52444	4.0185	15.2251	1.22221	6.79812	6.60882
24.2	0.09587	11.5174	5.47393	17.7087	8.63278	15.3986	3.89608	28.2002	7.56339	3.24768	-0.25007	12.6276	-1.82217	4.38854	4.91376
24.3	1.51002	10.4174	3.54427	15.1686	6.92256	12.578	3.97306	25.9851	5.84554	4.06628	-3.28961	12.4872	-5.49981	2.04788	3.64737
24.4	3.54848	9.19049	2.29965	14.0992	5.89916	10.0571	4.21938	24.9912	4.92723	4.76927	-5.39191	14.8564	-8.39271	0.7304	1.53841
24.5	5.8232	8.48553	1.75988	12.9827	7.40811	6.99827	5.03248	24.4757	2.74619	6.24065	-7.03302	15.4338	-9.73147	-0.10619	-1.10903
24.6	7.04331	7.45821	1.98904	11.3723	9.54408	2.68787	5.4569	21.0976	0.30801	6.91445	-8.17459	14.0833	-9.61032	-1.16873	-4.02687
24.7	8.20065	6.11648	1.66156	8.92866	10.262	-0.89124	4.56454	16.9377	-1.3878	7.54037	-6.0842	11.5949	-10.0761	-1.85551	-5.7404
24.8	8.3125	4.61945	0.52113	6.70647	9.3337	-1.88056	2.8186	15.0227	-1.79508	7.81246	-3.65007	10.7247	-8.97747	-1.72756	-5.83701
24.9	8.75763	3.90811	-0.0497	5.74903	9.01211	-1.13674	2.01406	14.47	-0.63766	7.54504	-2.84326	11.9673	-7.4067	-0.91987	-5.96174
25	7.41882	3.93397	-0.89127	4.79117	8.59311	-0.6917	2.32804	14.4621	0.8274	5.53065	-2.78519	12.412	-4.9307	-1.23983	-5.7797
25.1	5.2628	3.66343	-1.65017	4.35942	7.70679	-1.35926	3.0311	13.2491	0.3532	2.39871	-3.27613	11.2781	-1.95565	-1.33023	-5.64406
25.2	2.86481	3.36088	-3.54169	2.79314	6.87394	-2.13337	2.0074	11.7733	-0.10136	1.09783	-3.53641	9.29995	-1.35573	-0.9558	-5.31094
25.3	0.58552	3.22979	-5.56087	1.03365	5.98805	-0.83065	2.40882	9.55393	0.28262	1.13403	-4.00255	7.91897	-1.22225	0.44694	-5.0355
25.4	-1.0101	3.24178	-6.26205	0.18687	5.87492	-0.12861	3.64938	8.30028	0.94443	0.84559	-5.38587	7.41807	-0.80543	0.34267	-5.47156
25.5	-2.2051	3.96511	-6.47458	1.3905	6.45375	1.32978	4.86941	5.85402	0.42378	0.0702	-8.18591	6.78436	0.85454	-0.43442	-5.77864
25.6	-2.78719	3.94311	-6.80426	3.84382	6.38808	0.86489	4.62308	4.30019	-1.1628	-0.90722	-10.2641	5.60241	2.12964	-1.14677	-6.20124
25.7	-2.56805	3.31095	-7.20805	5.93897	5.47178	-0.10459	3.01931	2.99654	-3.13624	-1.93719	-11.3803	2.97726	3.21296	-0.96255	-6.04355
25.8	-2.43223	2.49732	-7.02169	8.02735	4.75675	-0.14533	2.71236	0.72735	-3.3578	-1.95937	-12.4257	0.42841	3.01217	-1.03536	-5.9183
25.9	-1.37648	2.45091	-5.69929	9.49418	5.17457	-0.71677	3.36029	-1.55039	-4.73938	-2.45567	-13.9171	-1.38288	2.89532	-1.52842	-5.69607
26	-0.20544	2.46279	-5.77731	10.2769	5.28299	-2.18143	3.64063	-1.9666	-8.06563	-3.70751	-14.0357	-2.21441	3.03918	-2.59685	-6.44519
26.1	0.96673	1.09643	-7.54654	10.109	6.35781	-3.61161	2.41281	-0.95772	-10.8073	-5.08781	-13.5222	-1.39697	3.13576	-3.27251	-7.07437
26.2	0.98956	0.26829	-9.30696	8.91209	6.63107	-3.54475	0.55645	0.58069	-12.7377	-5.32486	-12.2499	-0.48493	1.57269	-2.1036	-7.96062
26.3	0.0468	0.80652	-9.67748	6.79826	7.31406	-2.92943	-0.20172	1.41146	-14.7001	-5.09949	-12.9918	-0.42411	1.26041	-0.1483	-9.03108
26.4	-2.45962	2.45498	-10.3244	5.27713	7.55161	-1.92026	-0.18234	1.2846	-15.865	-6.09676	-13.7986	-0.88785	0.50332	1.99845	-9.53894
26.5	-5.31644	3.10824	-10.6658	3.0935	7.21033	-1.12943	-1.06956	1.18294	-14.6571	-8.00721	-13.6372	0.64963	-1.77789	3.26783	-9.61526
26.6	-6.92575	1.92399	-11.7483	2.60488	6.31974	-1.93697	-3.26595	2.77177	-12.0187	-10.3276	-12.0771	3.78233	-2.4684	3.74416	-9.89731
26.7	-7.12321	-0.27987	-11.8708	3.80959	4.87045	-3.4267	-6.52614	4.30144	-9.34105	-10.6218	-10.8712	6.50566	-2.96379	2.8686	-10.2634
26.8	-7.44621	-3.16879	-11.3088	5.07178	3.53941	-4.48184	-9.56015	3.59837	-9.10896	-9.06871	-10.6279	6.54948	-1.77725	1.75701	-10.5027
26.9	-7.93928	-6.20486	-11.1239	5.79236	2.33619	-7.85932	-10.6289	2.15057	-8.12975	-6.50898	-11.9457	3.88857	-1.27853	0.33715	-11.5211
27	-8.71198	-9.42667	-11.3731	6.62681	1.3867	-9.17146	-10.5519	0.37009	-7.07961	-4.27738	-12.8904	1.71115	-3.57905	-1.20894	-14.0716
27.1	-8.59898	-11.1496	-11.1999	6.80242	1.23818	-10.4115	-11.3086	0.10948	-6.6595	-1.76086	-13.3605	1.43432	-5.06921	-3.09048	-16.2415
27.2	-7.5672	-11.6496	-9.88586	6.8612	2.3559	-10.5128	-14.2498	1.36292	-7.59886	0.96704	-14.0115	1.55803	-5.50897	-5.05567	-18.3269
27.3	-6.93831	-11.4666	-8.75472	6.88202	3.12044	-11.4823	-15.478	1.3773	-8.87091	3.24768	-15.1175	1.70325	-5.55057	-6.1395	-19.5752
27.4	-6.47834	-8.48051	-8.99489	6.51158	4.51538	-9.15474	-12.9047	0.73527	-10.9996	2.84947	-15.67	1.71994	-5.23163	-5.35966	-19.5199
27.5	-5.78554	-5.71214	-9.03084	5.90129	5.49382	-5.23402	-8.23103	-0.91648	-12.0529	1.05812	-15.0045	4.06358	-4.33775	-4.35796	-18.8793
27.6	-4.71266	-1.45675	-7.76959	4.19951	5.41728	-1.87325	-4.74466	-1.67538	-11.1667	-1.55299	-12.9377	6.23128	-2.90752	-5.7818	-16.9522
27.7	-2.41625	2.17407	-6.42224	2.36158	3.77126	-1.3603	-2.83945	-2.00264	-10.7507	-2.80483	-10.6122	6.90256	-0.48082	-7.99129	-14.8106
27.8	0.43828	4.15676	-5.98838	1.14645	1.73063	-2.97017	-0.18253	-2.92986	-10.6139	-3.76473	-9.19393	5.96651	2.68829	-9.27303	-13.8464
27.9	1.86954	5.07563	-6.76049	-1.20003	-0.44971	-4.05352	2.01653	-3.6398	-10.223	-4.63355	-8.42608	5.20307	5.94862	-9.12892	-14.111
28	1.9346	2.71814	-8.49743	-4.29637	-2.53823	-4.22276	2.20146	-4.54452	-9.44173	-5.33654	-8.07184	4.21753	8.0001	-10.1019	-14.6768
28.1	2.23706	-0.1755	-9.95972	-7.68429	-4.67714	-4.28544	0.91092	-5.14801	-7.83445	-4.99789	-7.65421	3.01567	8.29739	-11.4344	-15.6313
28.2	2.44136	-1.47741	-10.4237	-8.8778	-6.66428	-6.29751	-0.72763	-5.52257	-5.74792	-4.41284	-8.03041	1.56099	7.63551	-11.2853	-17.0245
28.3	2.25076	-1.36677	-10.8825	-10.5501	-7.2656	-7.35787	-0.8105	-5.86337	-5.97593	-4.92783	-8.78681	1.0985	6.10902	-9.52198	-18.2135
28.4	0.62204	-2.56179	-10.8592	-11.4444	-6.23882	-7.51771	-1.36511	-5.51861	-7.13861	-6.09208	-10.0542	3.16687	3.57609	-7.39016	-18.4023
28.5	-2.10238	-4.81041	-10.2106	-13.0913	-4.25814	-7.04969	-1.83001	-4.56869	-7.67189	-6.7437	-10.8515	4.43142	0.37066	-6.44149	-18.5475
28.6	-3.94795	-5.51746	-9.69216	-13.168	-2.59875	-7.50204	-0.43835	-3.66022	-7.50961	-6.75187	-10.1525	4.10713	-3.93942	-5.56051	-17.9279
28.7	-4.96034	-3.95775	-9.02448	-10.7554	-1.38511	-7.48846	2.1682	-2.53489	-7.02285	-6.00684	-8.69781	2.40588	-7.35294	-4.15891	-16.2332
28.8	-6.9463	-3.03889	-7.59203	-7.76273	-0.63747	-7.38086	3.69708	-1.81099	-7.19355	-4.88695	-7.64925	0.25117	-9.34352	-3.69123	-13.9053
28.9	-9.25526	-4.91666	-6.76513	-5.26441	0.95506	-7.49682	2.96799	-1.33811	-7.69217	-4.61954	-7.77757	-1.42067	-10.2304	-3.71975	-12.1495
29	-9.4356	-6.49023	-5.46157	-3.42199	2.15592	-6.31527	3.44791	-1.48372	-7.36502	-4.2587	-7.78902	-3.31736	-9.62516	-4.12079	-11.7504
29.1	-9.04183	-6.23639	-5.77584	-2.84368	2.03736	-7.10715	4.52691	-2.63842	-5.49822	-3.23457	-7.94637	-5.99963	-7.99114	-3.98676	-11.924
29.2	-8.29196	-4.61048	-5.58532	-1.3832	1.22009	-8.33675	5.96608	-4.24371	-2.57525	-2.09834	-9.41409	-7.88266	-5.50548	-3.73705	-11.7953
29.3	-8.74508	-4.09677	-5.91305	-0.83141	0.71485	-8.8873	5.03685	-5.86296	0.54873	-1.82859	-11.7795	-9.03327	-3.84316	-4.38914	-12.133
29.4	-10.2745	-3.32109	-7.24376	-1.3147	0.23827	-9.10982	3.35079	-7.33471	2.84932	-2.98584	-14.3282	-8.69963	-2.17119	-5.53181	-13.6906
29.5	-11.1533	-1.90875	-7.68423	-2.28405	-0.31867	-8.68567	2.4227	-7.40304	3.13536	-4.06952	-17.2996	-7.09567	-1.05422	-5.73466	-15.8215
29.6	-11.5334	-1.24601	-6.82481	-4.73825	-0.74046	-9.80349	2.218	-6.27147	3.31805	-4.76901	-20.1735	-6.45386	-1.85526	-5.17563	-17.3008
29.7	-10.8155	-2.26573	-6.58855	-5.92284	-0.91852	-10.1639	1.82152	-4.65326	2.58826	-4.34394	-22.7853	-6.53806	-3.96505	-5.23219	-19.1671
29.8	-10.6831	-4.42999	-6.43545	-5.93811	-1.44315	-8.91237	-1.0114	-3.81395	0.98484	-3.79977	-24.0118	-6.7046	-6.63081	-5.08723	-20.2745
29.9	-11.3668	-6.39474	-6.72429	-6.01678	-2.51003	-6.67256	-2.45114	-3.34774	-2.40315	-4.59968	-22.0606	-7.35369	-7.08793	-5.14692	-20.3477
30	-11.9888	-6.13079	-7.55828	-6.46127	-3.75659	-5.91202	-0.8603	-2.56447	-7.33948	-6.40388	-19.9199	-7.85173	-5.91371	-4.95738	-20.6752
30.1	-11.8324	-5.68956	-7.30148	-6.6655	-4.71564	-6.08544	1.73998	-0.98106	-10.8677	-7.93598	-17.8723	-6.89047	-4.57332	-4.61594	-20.2276
30.2	-10.6466	-4.43251	-6.42004	-5.42726	-4.50644	-4.3126	2.769	-0.17508	-11.5145	-7.99554	-16.3062	-4.10273	-4.17443	-5.12468	-19.4293
30.3	-10.0964	-2.65162	-6.88351	-2.05102	-5.40407	1.27127	2.63006	2.05224	-10.9773	-7.57164	-12.644	-1.20008	-1.73102	-5.50529	-16.9224
30.4	-10.0953	1.72078	-7.18726	1.49425	-5.20338	8.64992	5.1948	5.2424	-9.51063	-5.88072	-8.06995	1.52024	3.84921	-5.4243	-12.6251
30.5	-9.58055	7.69897	-5.11697	4.8881	-3.07783	14.7394	10.1354	10.7345	-5.82116	-3.161	-5.19177	4.62077	7.7295	-4.08125	-8.84092
30.6	-6.98625	14.9121	-1.28258	9.14717	-0.05669	20.3923	13.6624	16.7131	-0.64068	0.04801	-4.36184	7.71465	9.6209	-0.49288	-5.97661
30.7	-3.6375	21.0712	3.49682	15.4486	2.77786	29.2178	16.6964	21.7234	5.0726	5.25272	-4.03357	11.0817	11.4101	4.60432	-3.01143
30.8	-0.20887	26.4708	9.81213	21.8714	5.53691	38.2732	19.0066	25.1604	9.79178	11.0203	-1.71892	13.747	12.5898	8.64107	-0.54511
30.9	3.21634	32.1388	16.621	28.0505	8.75799	42.57	22.5947	27.6704	14.7328	15.2056	1.88531	16.4476	14.6703	11.3931	0.58059
31	6.93146	36.7549	24.1506	33.5452	12.2954	43.4371	24.4501	30.1014	19.3537	18.4905	4.80668	20.9307	15.5649	13.3443	0.36437
31.1	10.5678	38.9287	30.1233	38.8302	16.0035	42.7465	25.1182	31.6517	22.6678	21.6901	8.34139	26.4821	15.3825	15.1396	-0.47863
31.2	14.3994	38.735	34.4634	44.2016	18.5556	41.6674	24.72	31.2139	24.8889	24.0467	13.1844	31.7484	16.2409	15.533	-1.05209
31.3	16.8601	37.9609	37.9767	48.2494	20.3665	40.0272	23.5492	30.6466	26.8109	24.2896	18.1268	35.7262	16.5443	14.1988	-1.10832
31.4	18.1396	38.0997	40.4168	49.663	22.6653	34.8612	22.5567	31.5026	28.5956	23.7162	23.3876	39.4101	15.9454	12.0293	-0.59188
31.5	18.2126	38.0372	40.3681	49.4505	25.9743	30.0441	21.6143	34.127	29.2059	23.5749	27.5347	41.3023	15.6375	11.1774	0.74215
31.6	16.5303	35.7884	37.9236	47.8929	28.7558	26.6343	21.9084	35.36	28.0963	24.7333	30.3168	41.8518	17.0974	12.0826	2.21347
31.7	13.6255	33.6808	35.8029	46.6104	30.6083	26.2707	22.2634	35.9191	26.6517	27.0642	30.1654	40.3062	18.4761	13.842	3.37292
31.8	10.0611	33.0463	35.18	45.169	31.11	24.4289	20.8298	36.226	25.9152	27.4869	27.3682	38.3999	18.3509	14.8715	3.87497
31.9	6.03321	31.8278	32.7903	42.6843	31.3705	23.098	18.8449	34.6415	24.1923	25.8964	23.1527	37.2736	15.8346	14.9937	5.24682
32	2.53039	28.1733	29.2061	40.348	31.8063	23.0907	17.1153	31.8553	21.2006	23.8342	19.175	36.1237	12.8009	14.3215	6.10057
32.1	1.28174	24.1741	26.1551	38.3376	31.3701	23.0562	15.1869	29.268	16.6425	22.5052	14.9849	34.9312	9.98558	12.8157	5.82134
32.2	1.0957	22.4152	24.4798	35.6442	29.6173	22.9946	14.0957	26.6776	13.4439	20.8529	10.4047	33.5381	7.21188	10.8425	3.72483
32.3	2.57604	20.6622	22.8727	32.894	26.9472	22.373	13.2159	24.9148	11.0875	17.401	6.41344	32.2206	3.73073	7.56665	1.07109
32.4	4.3908	19.0948	20.0614	30.5062	24.0863	21.2416	11.6745	20.8551	10.5365	14.8342	2.95817	29.5131	0.43204	5.36106	-0.76324
32.5	5.94533	16.3607	17.1006	28.6661	20.9957	20.9365	10.536	15.5174	9.75979	12.9401	1.81697	25.4377	-0.59208	4.00689	-1.85752
32.6	7.21908	15.0654	15.9893	26.706	18.6086	22.1808	10.2711	13.1399	7.94421	12.5477	1.46521	22.2187	-0.60643	3.52173	-3.6248
32.7	8.7428	13.782	16.1106	23.8026	17.8422	22.2508	11.0153	10.9882	7.32464	12.7743	1.55303	20.1034	-0.17331	3.49178	-5.25872
32.8	9.68327	13.5283	15.5532	21.6362	16.7706	23.9108	12.9479	9.55393	7.26339	11.9323	1.89406	17.0172	0.90335	4.70708	-6.46206
32.9	9.25641	11.578	13.6597	20.737	15.0508	23.5263	13.3313	7.77158	8.01683	10.9654	3.96002	14.4859	1.61746	5.90697	-6.87922
33	7.53296	10.0126	12.466	20.4324	13.4293	23.8209	12.4789	6.09234	9.02873	10.016	7.25501	11.4617	2.1671	6.5851	-6.95468
33.1	4.87359	9.76084	11.404	18.1339	12.1771	21.9008	12.7928	5.95526	9.21157	7.75757	11.1546	9.19027	2.81098	5.91619	-7.18331
33.2	2.93557	9.63381	9.02193	15.3187	11.9871	19.3434	14.0893	6.80207	7.64716	4.94443	14.2109	7.05527	3.41926	5.76173	-8.40166
33.3	1.22924	9.39791	5.44043	13.717	11.3473	16.8654	15.7406	8.14551	6.60115	2.96858	14.3108	5.72351	3.73455	5.43293	-10.1575
33.4	-0.21686	9.15816	2.33169	13.3753	8.74605	13.4816	14.4308	8.55339	6.14091	2.51199	13.9745	4.7899	3.17719	4.10537	-12.1686
33.5	-1.01467	9.21875	-0.25612	13.2892	5.35764	10.0185	11.7291	6.88581	4.88008	3.84557	10.7497	3.92194	4.54612	1.60074	-12.7219
33.6	-1.65611	9.60785	-1.90942	12.3684	3.4056	6.53025	10.3503	5.98005	2.32635	4.91874	5.66561	4.03587	5.69699	-0.11893	-13.3542
33.7	-2.27472	9.1102	-3.18388	10.8418	3.16319	5.78852	8.85526	7.75366	-1.30621	5.20601	0.49307	4.07964	5.44893	0.07775	-14.0827
33.8	-1.70176	7.23023	-4.21768	10.726	3.43028	5.56913	7.36781	10.5478	-5.19422	5.81792	-2.8581	3.61133	3.6631	0.57308	-14.6068
33.9	-1.77253	5.86221	-5.36814	10.3138	3.68267	4.17029	4.84394	10.2672	-6.817	7.1153	-4.52482	3.00106	1.8746	0.31272	-14.51
34	-3.21863	5.86056	-5.16515	9.8163	3.06886	0.99547	2.02679	9.6783	-7.30124	7.16669	-5.80922	1.93767	0.08708	-0.54117	-13.5574
34.1	-4.66701	4.5914	-4.16901	9.36078	3.34006	-0.82647	1.44025	9.02252	-8.1929	5.6591	-7.46521	-0.26325	-1.10418	-1.50047	-13.0709
34.2	-5.91565	1.88165	-2.1875	8.28774	3.80371	-3.05166	1.97966	8.90232	-7.94285	3.6996	-8.31783	-2.10614	-4.23403	-2.73221	-12.647
34.3	-6.93945	-0.86826	-0.94532	6.5537	3.97089	-5.5119	2.36378	6.82228	-6.97921	1.63733	-6.70859	-4.15721	-6.93839	-4.58495	-11.6878
34.4	-7.6334	-1.76437	-1.05122	5.23637	4.03583	-8.00872	1.533	3.2611	-5.86256	2.18618	-5.80629	-4.92823	-9.14403	-6.28674	-10.3824
34.5	-9.02357	-1.14949	-2.42864	4.69625	3.9042	-9.21638	0.64654	0.84442	-3.3684	1.47034	-6.81188	-4.48877	-10.1152	-7.18008	-9.9798
34.6	-8.86606	-0.05125	-3.29981	5.06566	4.18686	-8.60941	0.13488	-1.01251	-2.8213	-0.5639	-8.0938	-3.73749	-10.9295	-6.8933	-10.7147
34.7	-7.30583	-0.64172	-4.28714	4.1326	4.47908	-6.04261	-1.27749	-2.05618	-4.72198	-2.03411	-8.52004	-3.42812	-11.4202	-6.88389	-11.1224
34.8	-6.38932	-1.49009	-6.62793	2.2533	4.41914	-2.39559	-3.4469	-2.05805	-7.382	-2.22212	-8.41273	-3.10659	-11.832	-7.16392	-11.0407
34.9	-7.03418	-0.60168	-9.37006	0.65648	4.35876	1.53662	-6.49079	-0.61879	-9.40616	-2.72192	-6.18731	-1.85847	-11.1485	-5.74949	-10.0906
35	-8.0945	1.12685	-10.3009	-0.42501	3.93331	5.78852	-7.34513	0.56445	-10.7881	-4.06719	-5.09389	-1.42753	-10.714	-4.14693	-10.1361
35.1	-8.48713	2.41195	-10.0803	-0.09524	4.12489	8.13176	-7.0874	0.87359	-13.1515	-5.91926	-6.41972	-2.24534	-10.1403	-3.36395	-11.0463
35.2	-9.58398	3.18335	-9.70243	-0.31174	2.96295	7.26884	-5.00049	-0.58609	-15.7983	-6.63743	-8.0566	-4.02045	-8.52165	-4.39807	-11.9157
35.3	-11.1202	3.13881	-9.30476	-1.67572	0.55593	6.69113	-3.25455	-2.31866	-16.9424	-5.7184	-9.00543	-5.1206	-7.11939	-6.72866	-11.6227
35.4	-12.7764	2.43341	-10.2642	-3.08381	-1.12799	8.41487	-0.10175	-3.46523	-16.4403	-4.33811	-9.01264	-4.42104	-5.3416	-8.16477	-11.3183
35.5	-13.3505	3.42465	-11.2684	-3.70601	-1.8599	11.3745	3.18049	-3.89832	-14.5627	-3.49615	-9.40561	-4.1506	-3.19888	-8.44357	-11.5272
35.6	-13.686	5.39106	-12.493	-3.80612	-1.15706	11.9125	6.0193	-4.72117	-12.395	-2.47786	-10.1837	-4.13454	-1.38808	-8.53834	-12.4073
35.7	-13.9291	6.07799	-13.0181	-3.9849	-0.57014	12.3492	7.59589	-5.1978	-9.67094	-1.15829	-9.85335	-4.29988	-0.26479	-7.81971	-13.1432
35.8	-12.9715	7.37573	-13.7564	-4.06039	0.21894	11.0412	6.9892	-5.59298	-7.04257	0.86077	-7.68672	-2.92166	-0.28676	-6.98332	-13.0999
35.9	-11.5437	7.5573	-13.3253	-4.78564	1.76271	9.24122	6.51898	-4.94116	-6.15154	3.3446	-5.97689	-0.216	-0.98489	-6.2684	-13.2771
36	-10.0782	6.8784	-10.4349	-5.26445	4.96732	6.4007	4.95703	-3.71729	-6.03171	4.80781	-5.59101	2.8312	-1.49423	-5.43504	-14.1815
36.1	-8.73366	6.70925	-6.08082	-6.37859	7.5239	2.01927	2.85529	-2.64071	-5.58788	6.96466	-5.17762	4.29326	-3.59964	-4.98143	-15.2501
36.2	-7.19854	6.85035	-1.6267	-5.91583	8.96555	-3.15926	1.82475	-2.4399	-6.43646	8.04134	-3.38587	5.06216	-6.79575	-3.69266	-15.6685
36.3	-5.19317	5.3332	1.76526	-5.47918	9.37498	-7.1061	1.87284	-2.05868	-8.15143	7.73539	-2.99349	5.56634	-8.67913	-3.69494	-15.882
36.4	-3.66718	0.7029	4.13222	-5.12419	8.91778	-9.93617	1.00804	-2.53385	-9.64575	6.98802	-3.62618	5.09589	-8.35087	-4.99464	-16.5927
36.5	-3.3613	-3.0809	5.59084	-4.58749	7.78962	-11.4698	0.0275	-2.13326	-9.55798	4.92809	-3.82212	4.36047	-6.88601	-5.20168	-17.0611
36.6	-2.33864	-4.65019	5.84373	-4.61783	6.29756	-9.65828	0.23961	-1.44352	-8.21633	2.0694	-2.87095	2.54471	-7.01057	-3.94228	-16.8195
36.7	-1.31713	-3.87815	4.32372	-4.20752	3.36267	-8.0714	0.16396	-0.38964	-6.44656	-0.87452	-1.00449	-0.89175	-8.46715	-1.86254	-16.4589
36.8	-2.17885	-3.57582	2.18348	-2.97143	0.98973	-7.501	0.43671	0.33821	-5.57547	-4.06485	0.62364	-4.0848	-8.07231	-0.99744	-16.3925
36.9	-4.04611	-3.53546	0.58985	-1.60619	-0.5458	-4.76913	-2.0197	0.6509	-3.8927	-6.84879	1.74018	-5.14326	-5.94955	-0.9711	-15.6851
37	-5.74559	-2.9892	0.41156	-0.38939	-0.9288	-2.45409	-4.41452	0.1826	-1.29148	-7.68491	3.53026	-5.59546	-3.64303	-0.59791	-14.7984
37.1	-5.93734	-0.73036	-0.13261	1.1275	-0.6758	0.61625	-5.00923	-0.178	-0.34811	-7.38596	5.54568	-4.62365	-3.07505	-0.38898	-14.0597
37.2	-4.29036	1.47361	-0.30308	3.23838	0.181	3.55288	-3.46894	-0.4636	-0.41266	-6.7145	5.1827	-3.83484	-4.61549	-1.28593	-13.9479
37.3	-3.71398	2.21454	-0.69806	3.86123	1.76678	6.95126	-0.91751	-1.02314	-3.04496	-6.93871	3.22747	-2.52575	-6.70225	-3.13972	-15.0668
37.4	-4.9124	1.94818	-1.89793	3.23142	3.72527	9.74789	0.76153	-1.51164	-4.85283	-7.62185	0.5208	-1.03547	-8.09988	-4.60263	-16.2743
37.5	-6.01153	1.90782	-2.22394	1.26243	4.36846	10.2901	0.78776	-2.53385	-5.94696	-7.66272	-1.49746	0.3281	-9.21556	-4.34893	-16.6994
37.6	-5.81179	1.22475	-3.6175	-0.85097	4.55518	9.19316	1.17587	-2.46927	-7.75138	-6.36534	-4.08113	0.02143	-11.2884	-3.56547	-18.1774
37.7	-5.15094	0.65044	-5.85068	-3.18429	4.47055	5.77598	2.02812	0.12365	-9.5885	-4.26921	-6.60638	-0.82247	-12.7339	-3.3689	-19.375
37.8	-4.38966	0.07009	-7.15645	-6.48313	5.18234	3.77226	1.85763	5.17178	-10.5155	-1.98273	-9.72761	-2.23338	-13.8446	-4.42592	-19.9573
37.9	-5.73874	0.20338	-8.10171	-9.33261	4.30204	1.07383	-0.44729	9.215	-9.49379	-1.22952	-11.6924	-3.56373	-13.7367	-4.91974	-18.3014
38	-8.05684	-0.13481	-6.99699	-10.7744	1.9817	0.34672	-1.53047	11.3467	-8.19486	-1.00415	-12.335	-5.21811	-12.7802	-5.06004	-16.6578
38.1	-8.33419	0.46182	-6.34545	-10.2767	0.24108	0.24434	-1.16098	13.0901	-7.74949	-0.45063	-12.6744	-7.35483	-10.5469	-5.07269	-15.327
38.2	-7.5729	2.18077	-5.89764	-8.38722	-0.4331	-0.26233	-1.0038	13.5415	-8.70667	-1.88113	-13.2539	-7.90308	-9.63635	-7.26383	-14.6505
38.3	-8.26	3.06752	-6.12582	-7.76376	-0.70857	0.60998	-1.05055	13.6776	-9.41317	-4.66975	-13.219	-6.35926	-8.12819	-8.77731	-14.1116
38.4	-8.73595	3.65403	-5.79052	-6.62478	-1.30798	1.56588	-0.1485	12.0723	-8.86937	-7.89978	-12.2869	-4.63461	-8.14984	-8.63216	-14.0317
38.5	-9.21189	4.04313	-5.46891	-6.19028	-2.06444	2.20523	0.35061	7.6418	-8.71649	-9.28124	-11.8671	-3.81774	-7.07382	-7.01763	-14.4498
38.6	-8.0089	3.91643	-4.85601	-6.39684	-1.75784	0.04376	1.32716	3.6217	-9.38448	-8.50001	-12.5526	-3.39808	-6.84741	-5.82163	-15.5982
38.7	-6.69634	2.62496	-4.95066	-7.222	-0.02133	-4.42438	2.41281	0.05199	-10.3087	-4.50977	-13.1041	-3.5944	-6.84708	-6.35072	-16.4537
38.8	-4.87017	0.85783	-5.17615	-8.32498	2.02958	-9.21115	1.96198	-2.24179	-10.0802	-0.43194	-12.5085	-3.59923	-8.322	-7.71715	-16.1996
38.9	-2.59316	-1.09483	-3.54536	-9.34078	3.01213	-11.7017	2.73326	-2.8132	-7.85375	3.01412	-12.0019	-3.14547	-9.56085	-7.27457	-16.0332
39	0.21572	-2.74329	-1.93265	-9.90233	3.37457	-11.616	4.4391	-2.65988	-5.88571	5.61356	-12.2516	-3.57153	-9.39007	-6.17553	-16.5629
39.1	1.62073	-3.26128	0.23058	-9.70235	3.22839	-9.74081	6.52012	-3.41607	-5.30493	7.29047	-13.0084	-4.28023	-9.45202	-6.34444	-17.2124
39.2	1.18245	-3.80369	2.06682	-8.46136	1.99417	-9.84842	7.72723	-4.48973	-5.61188	7.50066	-12.6994	-4.71455	-10.9239	-7.1413	-17.0494
39.3	-0.1187	-4.13669	1.73811	-6.31401	0.74952	-9.09101	8.85849	-5.08844	-5.4964	6.11336	-10.7653	-4.99544	-12.7021	-7.09054	-17.0145
39.4	-1.56252	-4.0806	1.20666	-5.23947	-0.65776	-7.07058	7.9152	-5.08281	-4.97259	3.60268	-9.64664	-5.08879	-13.1599	-6.55176	-17.2463
39.5	-3.47543	-4.01824	0.77646	-5.16374	-1.72273	-4.89345	8.50193	-5.39237	-3.62869	-0.06877	-10.7511	-6.14059	-13.2241	-5.16936	-17.128
39.6	-6.84358	-2.75283	-0.74159	-4.53879	-2.5165	-2.8657	9.2046	-6.55332	-3.85818	-2.56077	-12.4652	-7.34646	-11.95	-4.89835	-16.8253
39.7	-10.4252	-2.53936	-1.83311	-4.42108	-3.87251	-2.90958	8.64448	-7.15889	-4.73194	-4.99906	-13.7941	-7.42001	-9.88984	-5.55414	-15.9433
39.8	-12.5298	-2.67035	-4.14211	-4.26733	-4.95804	-4.79734	7.41533	-6.4777	-5.0873	-6.09676	-14.1143	-7.59902	-8.9533	-6.36374	-15.4501
39.9	-13.0354	-3.48012	-6.12925	-5.97294	-4.55902	-6.36019	5.91362	-5.45611	-4.77544	-9.30577	-14.6191	-7.6932	-7.68947	-7.40318	-15.7193
40	-12.5355	-4.22127	-6.77223	-7.27775	-3.25987	-6.72688	5.06802	-5.16968	-4.92004	-12.6888	-16.1649	-7.16345	-5.66856	-7.42561	-17.0292
40.1	-11.4079	-4.13637	-5.68829	-7.10472	-1.94441	-6.91388	4.72097	-4.06664	-5.99916	-14.7125	-16.6001	-5.44821	-3.7675	-6.89396	-18.6567
40.2	-8.99618	-3.62453	-3.6471	-5.19446	-1.02428	-5.8671	3.49295	-1.69246	-6.84247	-14.57	-14.9491	-3.30328	-1.70499	-4.57164	-20.3064
40.3	-5.4865	-4.00967	-0.74942	-1.92234	1.51659	-3.13523	3.21242	0.59673	-6.04637	-12.5311	-10.6848	-1.86305	-0.99381	-2.13402	-21.5475
40.4	-1.79535	-3.32922	1.05674	2.29369	7.26486	2.19896	4.05688	2.30576	-4.74415	-8.72422	-6.63068	-0.10155	1.36307	1.13914	-21.3876
40.5	0.10044	-1.77049	2.9886	6.36446	13.8503	8.46397	5.0781	4.66641	-1.67875	-3.98661	-4.15525	2.68141	5.57203	3.81231	-18.9522
40.6	0.4223	2.69585	5.02123	11.8637	19.9645	16.2678	6.49427	7.55451	2.32074	1.72842	-1.09376	6.51039	9.62545	5.59481	-15.255
40.7	1.1094	8.79415	6.7819	17.9902	24.0021	22.5892	9.51327	10.3126	6.1668	8.33795	4.0744	11.3213	14.6833	6.9716	-10.7124
40.8	2.26103	13.9294	7.76581	25.5922	28.0031	30.5383	14.1845	13.6815	10.7996	14.4979	8.68954	15.0184	21.1544	7.57169	-5.72622
40.9	2.60001	18.0374	8.0116	32.1689	32.7014	37.3455	17.2326	17.4466	15.0357	18.2803	11.5458	18.6499	26.463	7.4081	-0.10929
41	2.00651	20.9589	7.76385	36.4492	35.9229	41.3299	19.5238	20.4129	19.3426	20.2538	13.5593	22.0461	29.7996	7.59194	5.3473
41.1	1.5511	23.2701	8.12337	39.3589	36.3929	40.6133	20.4101	21.5651	23.9866	21.4286	14.9354	24.3744	29.6891	7.40496	8.39678
41.2	1.14136	25.0132	7.98299	41.2539	35.9902	39.2103	20.799	19.9908	26.8972	22.0732	15.0151	24.4142	28.5977	7.39147	7.65683
41.3	1.38447	24.7756	8.41612	41.78	35.9669	37.7122	22.2942	18.3834	27.9676	22.1818	13.5869	22.698	27.7258	7.95867	5.85414
41.4	0.53073	23.2585	8.02652	41.2272	35.6081	36.9182	21.926	18.2843	26.5443	23.1288	11.5442	20.7917	25.8219	8.61798	4.12846
41.5	-1.36849	20.5663	8.10258	38.6067	34.7855	33.921	20.5743	18.0397	24.7191	23.1253	10.6826	19.3059	23.496	9.26797	3.35261
41.6	-2.97552	18.6823	9.44063	35.0606	33.5447	28.8636	19.3596	18.0462	22.9713	22.7248	12.4083	16.7382	22.7902	9.58698	1.78521
41.7	-3.00519	17.2257	11.6496	33.2362	32.9746	26.3313	17.7634	18.182	19.6646	22.0019	11.722	13.9131	23.2429	9.75561	-1.12177
41.8	-2.03961	16.1377	13.2606	32.1495	33.664	25.0766	18.1321	18.9184	16.6001	21.3643	10.3141	11.4469	24.0775	8.61969	-3.38028
41.9	-0.28306	15.5979	13.6177	29.6542	33.615	22.7512	18.8894	20.8932	13.6732	21.7041	8.83621	10.0413	23.073	7.6984	-3.82423
42	2.01335	14.9997	12.5252	26.9479	32.8506	19.4155	17.7087	23.2295	11.9238	21.3048	7.89707	8.87644	21.1847	7.55164	-3.33502
42.1	3.48114	15.1131	11.0709	23.5286	31.5229	16.7975	14.5087	24.2015	10.9461	19.0557	7.51096	7.50492	18.5628	7.24888	-3.75574
42.2	4.53233	15.1036	9.78621	20.6808	30.5979	14.7269	12.408	24.1986	9.43734	16.4749	7.14469	6.97185	16.3535	6.46125	-4.83168
42.3	4.75261	14.4891	7.701	17.5421	29.3502	13.4367	11.9305	20.7547	7.53168	14.8225	5.96394	6.52963	14.2485	4.82077	-5.97457
42.4	3.20493	13.7737	5.28537	14.4165	28.5748	11.7119	11.1798	17.7158	6.82068	12.9751	4.6184	6.78395	12.8029	2.62307	-6.08444
42.5	0.86857	13.5984	2.28889	11.1696	26.0715	8.53919	9.40607	14.2169	6.86706	10.4458	3.89446	6.37796	9.7929	1.16072	-5.89112
42.6	-1.29316	13.2237	0.12932	10.0359	23.534	7.37227	5.64031	11.0732	6.0824	6.81869	3.48026	3.87111	8.56273	0.0883	-6.97096
42.7	-3.31793	12.3652	-1.71914	10.7648	21.6762	7.60732	2.66579	7.8899	4.82009	2.77123	3.19036	1.87322	9.8478	-1.2961	-8.39068
42.8	-5.02425	10.3138	-1.98132	11.7381	20.2343	8.38457	0.4082	5.88339	4.1902	0.13676	2.42287	0.83472	12.2409	-2.2845	-9.30824
42.9	-6.43611	9.1187	-1.95613	12.7819	17.884	8.41696	-2.19075	5.34802	4.89551	-0.83365	0.52986	0.74745	12.2418	-3.04495	-10.0701
43	-7.10837	8.5908	-2.14323	12.8438	15.1585	8.65201	-3.58222	6.10025	5.08508	-2.13921	-1.61387	0.62494	10.8768	-4.24085	-10.9399
43.1	-6.46921	7.69239	-2.63775	12.0562	12.5458	9.42508	-3.25436	6.66583	4.52893	-2.22562	-3.09516	-0.83504	9.9752	-4.1629	-11.2265
43.2	-5.69765	4.87364	-3.36168	10.8483	10.3129	11.3149	-2.28522	6.87394	3.29294	-0.85818	-3.87257	-1.34629	9.11456	-3.36994	-11.6011
43.3	-4.76745	2.43773	-3.41353	8.85274	8.70021	12.0013	-0.27205	7.15954	2.85711	1.31269	-3.76031	1.03529	7.54347	-4.54788	-10.7944
43.4	-3.83724	1.51303	-1.48876	7.05996	7.53255	12.9248	1.66605	6.10359	2.54013	4.41193	-4.22739	3.59475	4.78851	-6.27857	-9.64606
43.5	-2.99949	1.91203	-0.19522	5.47883	6.93462	13.069	2.60801	3.60691	1.43309	6.39129	-7.50845	4.12902	2.18803	-6.76231	-7.97056
43.6	-2.24619	2.28893	-0.72056	3.68628	7.87442	11.8383	2.09674	0.25655	-1.5766	7.7529	-11.9246	3.44583	2.1684	-4.83362	-7.42815
43.7	-1.11054	0.61055	-0.94581	1.98492	9.0149	8.6447	1.31348	-2.3924	-3.77715	9.85838	-14.5648	2.50676	3.87232	-2.72489	-7.69785
43.8	-0.75672	0.36673	-0.94948	1.75399	9.22968	5.5942	-0.49347	-3.15526	-5.05888	12.6411	-16.1809	2.24693	5.87053	-2.31957	-8.61663
43.9	-0.54785	1.28977	-0.39137	2.99708	8.60089	2.98561	-2.81246	-3.35357	-5.90606	13.7902	-17.806	1.86282	6.93722	-2.50046	-9.50474
44	-2.21195	1.28592	0.95426	2.85328	8.18101	0.70609	-4.49701	-1.9266	-6.71801	13.2706	-18.6242	1.17173	8.54626	-1.14582	-9.74316
44.1	-4.36455	0.31294	0.2203	1.28718	8.54873	-2.03831	-3.85478	0.39175	-6.80038	12.3048	-18.7606	-1.14618	9.88794	-0.15695	-10.9575
44.2	-6.29344	-1.62323	-0.15218	-1.11529	9.37865	-3.91457	-1.9087	2.35701	-5.21815	11.1873	-16.6758	-2.5074	11.4287	-0.30162	-12.0834
44.3	-7.80688	-3.01336	-0.69243	-2.61523	9.62296	-3.27731	1.26596	3.65191	-2.49513	10.5135	-13.0035	-2.94656	11.6464	-1.70418	-11.2167
44.4	-8.97221	-3.86547	-3.40619	-2.61588	9.67967	-3.72653	4.09964	2.77406	-0.49875	9.06897	-9.54691	-3.49757	10.2485	-3.1573	-8.5517
44.5	-10.4343	-5.52758	-5.88981	-2.07193	9.41111	-4.93523	3.978	1.79685	0.07046	6.75914	-7.16237	-5.2928	8.10009	-4.00397	-6.26695
44.6	-11.6065	-8.15903	-7.70967	-1.37592	8.41298	-5.71353	2.48466	1.02003	-0.07828	4.88605	-6.76612	-7.1069	6.56395	-4.20748	-5.23591
44.7	-11.2835	-10.7745	-8.21275	-0.23774	7.31201	-8.23855	1.07342	0.37467	-0.52821	2.34967	-7.45548	-8.71673	4.68057	-5.09455	-4.48882
44.8	-9.25298	-13.2348	-8.72684	2.02881	5.88606	-9.47233	-0.74664	-0.96627	-1.49894	-0.26612	-8.88672	-9.60444	2.49691	-5.49416	-3.84799
44.9	-7.92672	-14.9335	-9.7873	4.11084	3.37855	-9.95602	-2.49315	-2.02326	-2.82066	-4.045	-10.1182	-9.77768	-0.09928	-6.19796	-3.77695
45	-6.39959	-14.9999	-10.3855	3.96601	0.85208	-10.3728	-4.15964	-1.49331	-3.93704	-7.32291	-12.2505	-9.1207	-3.78016	-5.90747	-6.32299
45.1	-5.2959	-13.672	-8.79947	1.90116	-1.46841	-10.8795	-5.9358	0.28072	-5.24046	-9.83243	-14.6622	-7.55442	-7.19902	-6.35727	-10.6548
45.2	-4.27096	-11.8908	-7.05128	-1.31158	-2.06194	-11.1282	-7.88815	2.55137	-5.06015	-12.0126	-16.0908	-5.80363	-9.26454	-7.18978	-14.9704
45.3	-3.72197	-10.3856	-7.34819	-3.43941	-0.77367	-10.8471	-7.31529	3.38401	-4.20778	-13.4361	-17.3875	-3.5444	-11.137	-8.64233	-17.6961
45.4	-3.59984	-8.06642	-8.2893	-5.96719	1.15045	-9.68231	-5.9721	2.37618	-4.64081	-13.9593	-17.8548	-2.28806	-11.2612	-9.33367	-18.822
45.5	-4.56999	-4.49775	-8.67915	-9.57246	1.36921	-7.25863	-4.46469	2.03308	-5.53014	-13.8589	-18.2446	-2.0656	-10.1366	-9.62093	-20.4453
45.6	-5.74445	-2.72226	-7.84271	-11.1697	0.89438	-4.96553	-3.95209	2.36055	-5.20671	-11.9764	-17.8124	-2.42783	-8.72235	-9.08311	-21.229
45.7	-7.71215	-1.88369	-7.22957	-8.95703	0.92214	-1.53268	-3.05631	1.58353	-3.05893	-9.61522	-17.3002	-3.13674	-7.28944	-7.8565	-20.8992
45.8	-8.9277	-1.44004	-7.30392	-6.77597	1.16205	1.35276	-1.66903	0.1549	-1.84791	-7.55412	-16.7086	-2.63797	-5.47832	-6.08199	-19.5754
45.9	-9.23358	-1.42575	-7.29267	-4.99869	0.51402	4.7783	0.71952	-1.94515	-1.46807	-5.30385	-15.9572	-2.43188	-3.81332	-4.44332	-18.6896
46	-9.31005	-1.90932	-7.36091	-3.91295	-0.94438	9.65805	1.43569	-3.43294	-2.81912	-3.56038	-15.3052	-2.4443	-3.57459	-2.12984	-18.8066
46.1	-8.3593	-3.40843	-6.63673	-2.81235	-2.06959	14.6924	1.13596	-3.52106	-4.46225	-2.82118	-14.9151	-2.26405	-3.84657	-0.31037	-18.9767
46.2	-6.32768	-4.86927	-5.78	-1.95012	-1.54393	15.268	0.76115	-3.25129	-6.19841	-1.6289	-14.7824	-1.90728	-3.24065	0.07071	-19.4527
46.3	-3.91485	-4.79262	-6.50271	-3.27721	1.32735	13.1891	1.01374	-3.90228	-8.11909	-1.17114	-15.6739	-1.74599	-0.13212	-0.08841	-19.6737
46.4	-1.02266	-5.2763	-6.89818	-6.12902	4.19994	10.2807	1.04644	-4.92532	-12.2466	-1.42921	-17.302	-2.48822	2.8499	-0.78042	-19.7914
46.5	0.25909	-5.7701	-5.44518	-7.95678	6.64971	10.0038	0.28161	-5.00157	-16.3253	-2.41363	-18.7277	-4.60769	4.50622	-1.45218	-19.3692
46.6	1.67437	-6.81797	-1.65873	-8.27973	7.97677	9.36449	-2.06512	-4.93282	-19.7478	-3.73087	-20.1723	-5.8279	5.02059	-1.32063	-18.1126
46.7	2.79062	-6.47716	1.60824	-7.46839	8.32995	6.14475	-3.23041	-4.95511	-21.2969	-5.24195	-22.6469	-5.4715	4.85314	-1.56017	-16.6564
46.8	2.9972	-4.78844	2.79906	-5.57364	7.50239	1.76228	-4.54091	-5.95691	-20.8662	-6.26024	-25.702	-4.34074	4.33844	-2.23839	-16.7295
46.9	3.29053	-3.20861	1.63392	-2.70445	5.49408	0.43448	-6.14563	-5.76026	-19.8536	-7.22248	-28.7392	-2.62399	2.36286	-2.15151	-16.8477
47	2.70159	-3.20465	1.22378	0.17174	2.74606	1.1083	-7.06098	-4.68055	-17.9782	-8.84567	-29.3297	-1.5305	-1.44282	-2.58982	-16.1616
47.1	2.10124	-4.21425	1.473	2.20031	0.3693	2.15926	-7.90715	-4.56577	-15.9204	-10.059	-27.7596	-0.23372	-4.83833	-3.78239	-15.8903
47.2	1.54996	-4.10339	0.48933	2.80869	-0.62927	0.83355	-8.20841	-4.5966	-13.8672	-10.1676	-26.0582	0.25101	-7.88693	-5.22107	-16.4391
47.3	0.7065	-4.27671	-1.28161	1.76618	0.36064	-0.90064	-8.23084	-5.1853	-12.4723	-9.90483	-25.3354	0.49931	-9.27654	-6.17857	-17.8201
47.4	0.2899	-4.72004	-2.64509	0.89801	1.44941	-2.54916	-8.13656	-7.46345	-10.248	-9.24971	-23.8673	-0.82418	-10.4048	-6.24463	-18.7949
47.5	-0.05821	-5.39289	-2.57343	-1.47387	2.27418	-1.93488	-8.16336	-7.49199	-9.08757	-8.07611	-21.416	-2.71022	-10.6997	-6.16488	-18.8348
47.6	-1.06489	-6.51906	-2.55069	-4.77481	4.10017	-2.37261	-7.29571	-8.10694	-7.75552	-6.80325	-19.2342	-3.40894	-10.461	-6.0454	-18.7275
47.7	-2.931	-7.28891	-2.52158	-8.62604	5.57018	-4.16216	-6.96158	-8.44775	-8.05672	-5.32603	-18.2219	-3.07135	-10.0202	-4.82335	-19.3777
47.8	-5.18633	-7.96251	-4.58209	-10.8276	5.67993	-7.36936	-6.81219	-7.94591	-8.77388	-4.95235	-17.9437	-1.93295	-8.26296	-2.61377	-19.8544
47.9	-7.12777	-9.29709	-7.86766	-11.9096	4.5105	-8.83298	-7.50118	-6.58415	-9.76453	-5.35639	-17.9418	-1.19847	-5.20771	-0.96426	-19.6793
48	-7.78862	-9.97444	-11.0397	-11.0643	2.95513	-11.5053	-7.31567	-5.20197	-10.0781	-4.72464	-17.198	-1.47473	-3.01277	-0.97168	-19.997
48.1	-6.87097	-9.71675	-14.811	-10.8509	2.31165	-11.733	-5.60946	-3.58418	-10.5527	-3.92238	-15.5294	-1.16562	-1.31923	-1.92832	-20.3572
48.2	-6.44867	-8.35082	-16.807	-11.7541	1.28136	-12.5197	-3.52976	-3.189	-11.0276	-2.19176	-12.9226	-1.02424	-1.41517	-2.96729	-20.7218
48.3	-5.51618	-7.04944	-17.6084	-11.0957	-0.2765	-12.1906	-2.01627	-3.22338	-10.6574	-0.4623	-10.802	-1.61283	-3.17804	-3.30901	-20.0592
48.4	-5.03338	-5.13517	-17.8792	-8.44749	-0.96714	-8.84342	-0.9789	-2.72383	-9.22634	0.35863	-8.15187	-2.96636	-5.00084	-4.09389	-19.8952
48.5	-4.50265	-4.57879	-17.8283	-5.50622	-0.26416	-4.25828	1.17834	-2.64071	-7.67996	0.42987	-6.97265	-3.57626	-6.27165	-6.00176	-20.0556
48.6	-4.40564	-2.70466	-15.0784	-4.03514	0.01409	-1.76982	2.97978	-2.81258	-7.61906	0.02348	-4.7888	-4.27852	-6.57193	-7.99785	-19.3244
48.7	-4.89756	0.00334	-10.9439	-2.82403	-0.0078	0.28613	3.03338	-3.42274	-8.86755	-0.12832	-2.87478	-5.90737	-5.70927	-8.27722	-17.9348
48.8	-5.51732	1.91113	-8.25995	-1.80272	-0.24448	1.23471	1.07418	-3.61189	-10.2651	-1.37783	-2.08344	-7.97356	-4.26963	-8.29015	-16.185
48.9	-6.35279	1.55602	-7.62138	-0.58694	-0.33674	0.83146	-0.16827	-2.63363	-9.98399	-2.20577	-1.47199	-9.24508	-2.11654	-9.33101	-15.1995
49	-6.48063	1.5678	-8.01024	0.39473	0.40913	-1.94533	-1.92922	-3.02235	-9.38757	-4.1863	-0.13411	-9.61645	1.43516	-11.4515	-15.516
49.1	-6.29344	1.18882	-6.88497	0.45945	1.5593	-7.07372	-4.09293	-3.58293	-9.02169	-4.67559	0.90642	-9.96652	3.82261	-12.7721	-15.498
49.2	-5.66456	2.58949	-4.25657	-0.78323	2.31782	-9.6541	-6.34425	-2.77258	-9.59334	-4.66274	-0.16527	-9.63953	3.30427	-12.4206	-15.2702
49.3	-5.05393	4.52631	-4.21866	-3.03852	2.44358	-11.1052	-7.16894	-0.71129	-9.7531	-4.46072	-2.7402	-8.41334	-0.17818	-11.1423	-14.9002
49.4	-4.33373	4.2606	-4.87166	-4.95051	2.45989	-12.2251	-5.09324	1.29126	-8.68071	-4.62654	-5.16522	-7.14396	-3.29044	-10.1597	-15.1052
49.5	-3.6706	3.18886	-5.2483	-5.09198	3.55086	-12.152	-4.38943	1.79997	-8.1494	-4.59852	-6.46567	-6.17209	-6.90174	-9.30763	-16.0103
49.6	-4.08378	2.79018	-4.29228	-5.04365	4.60291	-9.65619	-4.42934	1.34376	-9.0172	-5.06913	-8.28361	-6.631	-9.31514	-7.32095	-16.4793
49.7	-4.45814	3.23987	-3.04594	-6.30122	4.99106	-5.95172	-4.40159	2.38305	-11.8528	-4.54947	-11.5523	-7.55671	-11.7978	-4.61518	-15.9342
49.8	-4.15796	4.96081	-2.10923	-8.22464	4.05479	-4.04098	-3.66452	2.5697	-13.9998	-3.34434	-14.3149	-8.98597	-13.876	-3.85644	-14.2924
49.9	-3.76305	8.14644	-2.46142	-8.67357	2.70628	-2.58364	-3.22813	0.76401	-14.9758	-2.38094	-15.0163	-10.6939	-14.676	-5.09635	-13.426
50	-2.68675	8.61968	-3.81781	-7.29643	3.01377	-0.77841	-3.83615	-1.96806	-14.0689	-1.21084	-14.6565	-11.0166	-13.357	-6.6433	-13.3312
50.1	-2.02591	8.45427	-5.26934	-6.92318	4.12003	0.88892	-5.62523	-2.47135	-12.6662	-0.71104	-14.3446	-9.17039	-11.364	-7.23436	-12.9819
50.2	-1.14478	8.23256	-5.8409	-7.71076	5.4399	1.98793	-5.89912	-1.4254	-10.5517	0.53964	-13.476	-6.41093	-8.80312	-6.48075	-12.633
50.3	0.04908	8.84085	-6.41515	-6.13575	7.51138	3.95195	-5.29262	0.43446	-7.82267	2.86699	-12.5344	-3.44237	-4.87288	-4.93115	-12.0605
50.4	2.5087	10.9138	-5.93971	-1.9602	10.6572	6.6671	-3.40413	1.68144	-4.8383	6.40063	-10.7764	-0.22795	0.14741	-2.30569	-10.8886
50.5	4.39308	13.1783	-3.97874	4.60674	15.4188	10.4301	0.35992	3.52129	-0.524	10.2613	-8.38537	5.18914	6.74081	0.85445	-10.1558
50.6	6.19414	16.9397	-0.95877	11.3374	21.4103	13.561	6.4019	6.75937	4.09858	14.2784	-4.98321	11.7088	13.4847	5.21468	-8.95845
50.7	8.47572	22.0709	3.95075	18.9549	29.1097	16.4621	15.3838	10.1272	9.4619	18.7509	-1.01198	16.3623	19.3451	9.67586	-7.35526
50.8	12.055	29.1081	10.9709	27.8042	37.7986	21.7065	24.0183	12.7293	15.3692	24.0011	4.36877	20.3192	23.4132	14.0906	-4.99495
50.9	15.4483	35.2709	19.1809	36.6564	45.6989	29.5114	30.0869	15.5226	20.8153	28.6582	9.90861	26.173	26.7879	16.9465	-1.73903
51	17.8828	38.6065	27.4428	44.6715	53.5258	38.6106	36.436	19.3919	26.3063	31.643	14.8714	33.988	29.0243	18.5028	2.09616
51.1	18.9271	41.3821	33.8456	51.6491	60.8286	46.1815	40.6838	24.7154	31.1316	32.8715	18.3872	40.9851	30.5482	19.2406	6.3761
51.2	20.7031	42.3381	39.5493	57.6749	67.4288	52.2302	43.7242	29.2903	36.0016	33.5686	20.5522	44.4886	31.7505	19.2878	11.6242
51.3	21.9666	44.0763	44.597	62.5496	71.1171	56.0611	44.581	33.4664	40.4826	34.5869	22.0856	46.4523	31.5018	19.0365	16.5181
51.4	22.5121	44.6643	47.0133	65.7893	71.3364	56.1917	44.6683	34.7719	43.6221	36.7403	23.2896	48.2353	31.4559	19.3547	19.0342
51.5	22.5053	43.9488	46.6352	66.7404	70.9844	54.2705	44.5246	33.9726	44.7454	38.6624	23.3444	48.3424	32.0679	20.7467	19.5143
51.6	21.5853	43.8561	42.6512	66.787	70.7247	48.9551	44.2929	33.1698	44.5207	39.8874	23.2422	46.2579	32.3182	22.1264	19.1666
51.7	20.1347	44.9363	38.1645	66.281	69.5846	43.0829	44.9424	31.704	42.9434	41.7523	22.781	42.0543	31.4329	22.9385	17.8014
51.8	17.7378	46.4218	35.5552	63.2553	66.4061	36.5453	43.5585	27.9162	39.6146	42.0454	23.6873	36.8977	29.4409	22.3508	14.9837
51.9	15.1675	46.7487	32.3953	57.9911	62.4188	31.4211	42.4137	24.4234	35.7058	41.6939	24.1945	31.7991	26.9476	21.121	9.80232
52	13.7454	43.6622	27.8554	52.6827	58.877	30.0588	41.1122	21.8684	31.054	40.3954	24.2341	27.6088	26.1132	19.797	5.40485
52.1	12.1029	40.6399	23.8265	49.2925	54.8697	32.2234	40.0218	21.3272	27.2324	37.7621	23.5417	24.8338	24.6416	17.4652	3.0648
52.2	9.77915	39.2779	21.6814	45.94	49.4311	34.832	38.2964	21.0093	25.2374	34.8181	20.5008	22.287	22.3657	13.9192	2.4083
52.3	7.61057	39.0099	21.5481	42.9037	43.3432	35.2519	36.1545	21.2969	23.9423	32.3133	16.9678	19.653	19.86	11.1599	1.75856
52.4	6.74314	35.5082	22.1517	39.4923	37.357	35.4264	33.4201	20.3168	22.3137	29.5071	13.4983	17.9347	18.3481	9.49107	1.56102
52.5	8.53849	30.832	21.0829	37.7315	32.7677	34.3577	30.3182	18.8271	20.9475	26.3308	10.5261	16.9644	17.281	9.01721	1.93615
52.6	9.95834	25.684	19.4233	36.2869	29.0623	31.3845	28.1718	17.2483	19.2388	23.3729	8.41619	16.3101	15.7465	9.09221	2.02689
52.7	10.4731	22.0956	18.7867	34.8295	26.0938	29.2585	25.6834	15.186	17.3048	20.0903	6.56863	15.1534	13.7452	9.30314	1.42909
52.8	11.0232	19.779	19.041	30.5671	23.9031	26.2279	22.3286	13.3409	15.7485	16.8533	5.52197	14.4246	13.1106	10.425	0.56787
52.9	12.3027	16.8504	18.1337	25.4547	22.3721	23.5305	18.312	13.0001	13.6746	14.1114	5.58536	14.3859	12.4783	10.4123	0.60942
53	14.4302	13.9156	16.282	21.3787	21.0932	23.0499	14.9776	11.1182	11.4684	10.364	7.11186	13.8581	12.7096	8.01513	0.34803
53.1	15.6834	13.5211	13.5888	17.7927	20.9165	23.214	12.9042	7.38494	8.70397	7.33251	8.7184	12.7695	12.0411	4.42086	0.01102
53.2	15.0351	15.4254	9.94127	14.7332	20.779	23.4177	11.4299	3.7469	7.24066	4.63264	9.27142	11.6923	12.2345	1.29275	-0.96934
53.3	13.1564	17.2228	7.05655	13.5719	19.8255	20.5416	9.22494	0.88963	5.25171	2.38236	9.20532	10.7739	13.6651	-1.25266	-1.65913
53.4	11.8302	17.3156	4.77715	13.0167	18.4859	16.8319	5.47172	-1.91161	2.87738	2.27143	9.20853	9.23913	12.7861	-3.57317	-2.48004
53.5	11.1625	16.0586	2.47794	11.7152	16.7932	13.9099	2.82583	-4.6391	-0.36909	3.30957	7.95483	7.41812	9.75179	-6.4472	-3.38249
53.6	10.6911	14.2275	1.06261	10.7715	15.2881	13.3207	0.18696	-7.00349	-3.46557	4.44814	5.54279	4.87104	6.90924	-8.05964	-4.71503
53.7	9.39565	11.6306	0.11979	8.71557	14.1883	12.6835	-0.90325	-6.18231	-5.06169	4.08846	1.80091	2.73723	6.77009	-7.63198	-6.07212
53.8	7.03989	8.55822	-0.63398	8.15355	13.0051	11.5667	-2.10941	-3.86291	-5.87399	4.06978	-2.25837	1.40605	7.16063	-6.76944	-7.57492
53.9	5.05964	4.3213	-1.86295	7.84156	10.8996	9.15346	-2.89171	-1.90161	-5.7837	4.3407	-5.68023	1.37408	6.66824	-6.45908	-7.97828
54	4.85876	-1.02992	-2.83096	5.52688	8.83243	8.26652	-3.04548	-0.81857	-4.58608	5.57853	-8.34263	1.05193	5.28926	-5.98988	-7.81334
54.1	4.998	-3.66104	-3.58351	2.18775	7.79771	7.56867	-2.92783	1.9785	-3.03535	5.22586	-10.1911	0.80878	5.43173	-4.80957	-7.76211
54.2	3.91371	-4.8135	-2.24619	0.93807	8.40094	3.61974	-1.27654	4.38122	-0.63514	3.76733	-10.9855	0.12377	6.53938	-4.03096	-8.30026
54.3	2.16744	-5.16235	-1.22291	0.62571	9.0644	-0.99884	0.9476	5.59196	0.88353	2.2796	-10.9642	-0.50894	7.74458	-4.61242	-8.84768
54.4	2.28271	-4.61872	-1.92434	1.11578	8.18175	-5.59861	2.66693	5.0043	1.50788	1.97365	-9.72085	-0.25275	7.09868	-5.92743	-9.13128
54.5	4.66815	-5.07061	-3.45266	1.16242	7.44057	-7.59293	4.16712	4.26644	0.99396	1.98065	-9.13135	-0.01053	5.52621	-6.6528	-10.0671
54.6	6.306	-5.02683	-4.10714	1.42856	6.9155	-7.77993	5.26398	4.19707	-0.77026	3.86309	-9.07883	-0.1871	3.34481	-5.96945	-12.0624
54.7	5.64401	-4.16481	-4.39353	2.02447	7.05316	-6.80732	4.3473	3.40505	-2.81498	4.38508	-9.16111	-0.7551	1.67349	-5.6858	-12.5515
54.8	3.6375	-2.11383	-4.33923	2.67468	5.50206	-4.70645	3.0501	2.1137	-4.61849	4.77628	-8.60538	-0.57157	-0.56077	-6.07686	-11.5471
54.9	3.16498	0.50981	-4.51166	2.35789	2.87952	-0.61439	2.33451	0.34009	-5.17444	4.4458	-7.32076	-0.41876	-1.96173	-5.93028	-10.1122
55	2.06243	1.84208	-4.51728	1.27448	1.54627	1.98375	3.26298	-1.22312	-5.09993	3.79185	-5.72108	0.33667	-4.73202	-5.50129	-9.46906
55.1	-0.99298	1.66126	-4.17439	-1.08004	1.41978	3.75241	3.05828	-1.86973	-4.6594	3.98337	-4.08799	0.39468	-7.96373	-4.86556	-10.0024
55.2	-4.43075	1.37366	-3.4622	-3.89791	0.62542	1.76959	3.00487	-2.24595	-4.40198	4.11065	-2.62063	0.15215	-11.6192	-3.95093	-10.0241
55.3	-6.46579	2.06113	-2.74805	-5.8423	-1.16707	-0.36471	3.02064	-2.35386	-3.52534	3.46722	-1.77122	0.39982	-14.5996	-3.87574	-9.78898
55.4	-5.99555	1.71084	-2.71063	-6.16484	-1.65409	-2.06338	4.682	-2.32178	-3.65837	2.3882	-1.11775	0.54448	-16.3484	-4.16518	-10.1596
55.5	-4.23558	0.28871	-3.11711	-6.70836	-1.1546	-3.90517	5.96095	-2.89007	-3.35247	0.86194	-1.51554	0.17372	-15.5434	-3.90787	-11.5291
55.6	-1.90607	-3.32001	-4.57793	-7.85606	-0.1503	-4.37946	5.74409	-1.93931	-4.12135	-0.27429	-3.50251	-0.4763	-14.1265	-3.10055	-13.2085
55.7	-0.22827	-5.87326	-6.13169	-9.24063	-0.90162	-3.86547	6.36579	-0.51213	-6.19736	0.30492	-5.09322	-0.62246	-12.867	-1.64401	-15.0774
55.8	1.0569	-5.76074	-8.43751	-8.88288	-2.22913	-3.36089	6.3177	1.06232	-7.50372	0.35279	-6.38812	-0.64309	-11.0013	-0.76883	-15.6619
55.9	0.93249	-4.3143	-10.69	-7.90528	-2.6421	-0.61022	6.88353	2.04953	-6.83784	-1.32995	-7.50926	-0.93297	-8.99677	-0.95837	-14.777
56	0.71563	-2.73677	-11.5022	-6.43335	-1.6372	1.16367	5.36091	3.12299	-5.39074	-4.57049	-7.62635	-1.09488	-6.67663	-1.31226	-13.6184
56.1	-0.18148	-2.71895	-10.7025	-6.26242	-0.67873	2.60639	3.17536	4.04604	-4.68767	-7.46888	-7.52766	-1.43184	-5.25669	-1.27947	-13.8225
56.2	-1.99395	-1.3815	-9.59262	-5.7068	0.06378	4.29461	2.96723	4.26727	-4.79929	-7.6347	-7.39344	-2.33926	-5.94152	-1.20713	-14.5948
56.3	-4.23329	0.7842	-8.54585	-3.30816	1.0697	5.50227	2.54054	3.29964	-4.81417	-6.56853	-6.19308	-3.35577	-7.64844	-2.43991	-15.1525
56.4	-6.03093	0.81433	-8.055	-0.58423	1.98895	4.90262	1.18765	1.80768	-5.24305	-5.23028	-6.87748	-4.06505	-9.81281	-4.79246	-14.8973
56.5	-6.76711	-0.27951	-7.05397	2.6618	3.1954	2.57818	0.04783	0.5157	-6.41836	-5.40427	-8.90011	-4.27109	-11.2764	-7.17105	-14.3466
56.6	-7.47703	-0.77079	-5.59584	5.12977	4.00708	0.25165	0.11607	0.01574	-9.42433	-5.53039	-11.7775	-4.46714	-11.4715	-8.66343	-14.3965
56.7	-8.155	-0.49453	-4.95408	4.58625	3.79287	-1.39582	1.69228	-1.95952	-11.9413	-4.755	-13.7287	-5.88643	-12.6327	-9.16524	-14.4273
56.8	-8.20636	0.56158	-5.10376	3.16031	3.36284	-1.15345	3.63056	-2.96173	-12.8775	-3.37587	-14.7451	-7.10025	-14.5661	-10.1562	-14.2158
56.9	-8.21777	1.70832	-7.1359	2.84856	3.47316	-2.40395	3.6528	-4.48286	-12.7784	-2.10885	-16.1202	-8.05693	-14.5078	-10.9931	-13.7703
57	-9.39679	2.89729	-9.43414	3.753	3.98691	-5.08463	2.99308	-5.60923	-13.3835	-2.75229	-17.7861	-8.67203	-12.3958	-9.87854	-13.9457
57.1	-10.1763	3.33655	-10.8155	4.40065	6.25524	-5.35729	1.71071	-6.1471	-13.2206	-4.53896	-18.1617	-8.88139	-9.21467	-6.79567	-14.8272
57.2	-10.666	2.66337	-10.8566	2.92747	7.71834	-2.80198	-0.95058	-5.6511	-10.8651	-5.17656	-17.0847	-8.69869	-7.99982	-4.21661	-15.9482
57.3	-10.4856	0.68861	-10.5372	0.81406	7.97662	0.94637	-4.73801	-5.37529	-8.45669	-6.32914	-16.5808	-6.89561	-6.33117	-2.13174	-17.7918
57.4	-8.99618	-0.94754	-11.2611	0.60265	8.37653	2.43401	-7.79521	-4.12101	-6.86148	-6.49379	-16.6723	-5.39888	-2.52314	-0.82225	-19.3648
57.5	-7.34577	-3.61748	-11.4166	1.10779	8.6351	1.02055	-9.48755	-3.27546	-6.17098	-7.09986	-15.9505	-3.66914	0.91536	-0.60029	-20.6409
57.6	-5.48879	-5.29992	-11.7559	0.45361	8.04335	-0.42948	-8.92837	-1.98181	-5.90592	-8.09129	-15.6209	-1.52551	1.10317	-0.18699	-21.2116
57.7	-2.45734	-5.69475	-11.2063	-0.7511	6.06355	1.7675	-8.32169	0.46758	-5.26677	-10.1489	-15.4347	-0.22941	-2.25172	0.13316	-20.7297
57.8	-0.38806	-5.12627	-11.2075	-1.68991	2.51399	2.07464	-7.72032	2.96884	-5.21323	-11.9122	-15.1756	1.00894	-5.58731	-0.48328	-19.8639
57.9	1.4598	-3.8788	-11.6817	-2.3348	-0.15571	1.00383	-6.19752	4.44018	-6.13562	-13.0216	-14.6872	1.11981	-7.63214	-1.4288	-18.7727
58	2.82942	-4.17486	-11.8471	-4.00946	-1.72313	-0.75647	-4.18302	3.79127	-6.32778	-12.9574	-13.3394	-0.15025	-8.33197	-2.3248	-17.4122
58.1	4.46042	-4.84969	-10.8862	-6.04886	-4.10827	-0.90691	-3.7721	1.69852	-7.02923	-13.3976	-11.9421	-1.93327	-9.04648	-2.79552	-17.4914
58.2	5.93506	-4.5753	-10.184	-8.2174	-6.69585	0.05107	-5.50416	0.21843	-7.20267	-13.6814	-12.0531	-3.54668	-8.34235	-1.94553	-17.5616
58.3	7.07984	-4.16179	-10.5915	-9.19524	-8.18864	0.66849	-6.78634	-0.15154	-6.9214	-13.6405	-12.191	-3.99249	-7.34588	-0.36655	-17.2525
58.4	8.17326	-5.92683	-10.9539	-10.4231	-8.71709	-0.37098	-9.0523	0.05178	-4.5423	-12.8441	-13.1205	-3.43878	-4.7467	0.53154	-16.6556
58.5	8.13331	-7.71628	-9.37911	-11.4841	-9.2858	-0.35009	-10.5341	-0.77461	-1.88376	-10.0123	-13.8897	-3.30629	-2.24775	0.50787	-17.318
58.6	7.28072	-7.47268	-8.18095	-10.7351	-9.73947	1.6996	-11.1415	-2.1143	-0.52456	-6.55452	-14.0669	-3.48135	-0.31409	1.26652	-18.5539
58.7	6.46122	-6.31438	-8.0594	-8.97323	-8.68228	3.44005	-10.0834	-3.10276	-0.04938	-3.47513	-14.1043	-3.95694	0.37244	1.99417	-19.1796
58.8	5.13953	-6.04075	-8.07139	-6.48023	-6.62903	3.99269	-7.63992	-3.02943	0.18341	-1.00765	-14.7602	-4.17904	-1.78722	2.00549	-18.68
58.9	2.36489	-5.69629	-7.78622	-4.82509	-4.33278	3.26977	-6.03577	-1.61226	0.49092	0.78603	-15.8718	-3.07551	-4.53553	-0.23138	-18.1334
59	-0.30132	-5.92604	-7.34526	-4.94957	-4.103	2.56982	-6.82055	-1.63725	0.07586	1.47735	-15.7346	-2.2154	-6.20353	-3.06976	-18.1795
59.1	-1.631	-5.77284	-6.08694	-5.44389	-3.13337	2.43924	-6.45753	-1.36103	-2.46987	1.87906	-15.0378	-2.41863	-7.31053	-5.07307	-19.4498
59.2	-1.44382	-5.93187	-6.36624	-5.7569	-1.79	1.11248	-5.11871	-1.10605	-5.93468	-0.22408	-14.0507	-2.53069	-7.59419	-6.01983	-20.2196
59.3	0.18262	-5.83091	-5.60073	-5.79192	-0.71254	-2.26292	-4.76367	-2.2572	-9.46699	-3.55103	-12.6899	-2.61697	-9.29414	-6.83835	-20.4245
59.4	1.61844	-6.23344	-4.34926	-6.53075	-1.5711	-4.31364	-5.33709	-4.46515	-11.9281	-7.00761	-11.1372	-1.04217	-11.4319	-8.21211	-20.8468
59.5	1.954	-7.12592	-5.09814	-7.30497	-2.64092	-5.98933	-6.4427	-5.69047	-13.7448	-9.2357	-10.0201	1.48869	-11.7905	-9.03672	-21.2336
59.6	2.36375	-7.72057	-6.60861	-7.87455	-2.39249	-6.08753	-6.2036	-6.81351	-13.8999	-11.2104	-9.18577	2.36268	-11.6537	-8.9737	-21.186
59.7	2.44479	-8.00507	-6.68369	-6.81444	-1.28404	-6.90552	-4.62644	-7.29576	-13.8293	-11.8538	-9.03645	2.42438	-12.8742	-8.63026	-21.3471
59.8	1.33082	-7.52369	-5.82867	-4.74152	-1.0199	-6.84388	-3.92966	-7.93904	-13.1602	-13.0496	-8.83059	3.38439	-14.716	-9.25117	-20.5711
59.9	-1.19728	-6.69149	-6.40537	-3.7062	-1.62196	-5.77203	-3.80004	-8.54212	-11.9666	-13.6218	-9.81918	4.84464	-16.8574	-11.028	-18.6181
60	-4.01758	-5.53287	-8.25653	-2.15854	-2.44262	-5.41893	-3.80042	-8.03528	-9.38455	-12.4505	-12.4263	6.17	-18.0972	-11.8687	-15.7094
60.1	-4.87474	-5.10175	-10.4454	-0.65375	-2.98179	-7.02253	-3.5138	-6.32354	-6.59937	-9.17848	-15.6969	5.64981	-18.4415	-11.4171	-12.4317
60.2	-4.28808	-3.86461	-11.3533	0.10096	-3.36346	-8.06931	-4.98908	-2.95923	-5.61932	-5.41829	-15.6249	5.36274	-18.3166	-8.72608	-9.95981
60.3	-3.33276	-2.77868	-11.9794	2.82339	-3.1444	-6.73837	-6.4178	1.27501	-4.53802	-3.56388	-14.5167	5.96214	-16.5956	-5.38998	-7.71248
60.4	-1.96199	-1.5478	-12.7028	6.13623	-2.14288	-2.30888	-6.19714	4.30206	-2.34281	-2.07498	-14.2707	6.24209	-14.0194	-2.78031	-5.39341
60.5	0.31844	0.23902	-12.8165	10.9844	-0.7378	1.69333	-3.64855	7.63013	1.92561	0.49059	-14.0022	6.47978	-9.83113	1.36357	-3.3288
60.6	5.29361	3.49857	-11.502	16.5561	1.46269	6.12177	0.13583	12.2189	8.17377	5.51664	-12.8549	7.90728	-4.12002	7.68566	-2.50267
60.7	11.7685	9.20601	-7.70208	22.509	4.76384	13.3385	5.1891	19.2221	16.6122	11.0904	-8.84141	10.2295	3.73982	14.2209	-0.78535
60.8	17.0724	15.1631	-2.20731	30.653	9.9258	22.8619	11.6471	27.7821	25.4805	17.144	-4.03352	14.9405	10.3402	19.8686	0.94993
60.9	20.7613	21.8579	4.8334	39.4598	16.2222	32.6851	19.4225	36.8603	35.0474	24.7777	0.76634	20.8768	14.912	24.1017	2.18939
61	23.6329	27.6967	12.274	47.7966	21.9432	40.4576	27.6428	44.1291	43.2875	31.3557	5.25091	27.6692	17.9245	27.3451	3.73976
61.1	26.2638	32.0425	19.1645	54.2657	26.8896	46.4615	33.7342	51.8793	48.9537	37.7434	9.15744	35.393	22.3089	29.9617	5.96436
61.2	28.4552	35.0844	23.1183	59.5064	31.5576	48.4861	36.877	60.2982	53.1587	43.3171	13.3756	42.3094	26.6141	31.5819	8.13692
61.3	28.5111	37.6852	26.4368	61.2276	36.0616	46.9598	38.4155	67.2831	55.2296	47.646	17.5586	48.0992	31.2989	31.0019	9.75018
61.4	27.3834	38.934	29.11	62.36	40.0429	43.6262	39.095	70.8719	54.7471	51.2088	20.2202	53.9736	34.2074	28.3441	10.652
61.5	26.7637	38.0931	31.3407	63.7388	42.5074	39.8057	39.4204	72.2066	52.5624	53.8223	21.1096	57.8286	37.4036	24.3536	12.1877
61.6	26.9543	36.3194	32.4968	64.448	43.0222	35.3846	39.8427	73.6351	50.4856	53.7697	20.8083	59.1396	42.0939	19.9965	15.6733
61.7	27.0878	32.5791	32.2246	63.3464	41.3406	33.4373	38.3205	74.1004	50.0479	53.5782	19.8008	58.0127	47.1071	17.0316	19.4968
61.8	25.8552	29.8971	31.7927	60.3324	38.2328	33.5188	35.2506	72.8084	48.6996	53.1567	19.7179	55.7525	48.6156	15.3908	20.8389
61.9	23.4127	27.2997	31.8617	57.7696	34.3169	35.5319	33.4164	69.8741	46.6624	52.1395	20.735	53.2219	47.1464	14.8521	20.8866
62	22.6069	25.6756	33.5509	58.8819	29.7164	36.984	33.4727	66.405	45.3587	49.3533	21.4963	50.4183	42.551	14.2987	20.3727
62.1	22.2393	25.1902	32.6631	58.9572	25.862	38.2314	32.0816	62.6382	44.5318	44.632	21.5705	46.6658	36.6404	14.8015	19.2777
62.2	21.05	25.7168	29.0782	55.2022	22.852	37.8762	29.2639	58.4308	42.3135	38.0014	20.4986	41.7886	31.1154	16.4355	16.9012
62.3	18.4923	26.4409	24.7728	51.0612	21.2466	39.7274	26.5676	51.6916	38.8847	31.9092	17.7626	37.047	25.2928	18.3196	12.1957
62.4	16.1844	26.3849	21.3136	48.8477	20.9279	38.4957	25.9729	46.3897	33.7084	27.6831	14.5596	33.3183	19.5458	18.916	6.90753
62.5	14.7612	26.3228	19.5265	48.4227	21.9951	34.5979	26.2255	42.1109	30.0033	25.49	12.5155	31.0426	15.3978	19.0928	3.14034
62.6	14.0992	26.2969	17.4004	46.3517	24.105	28.6265	26.3834	38.4575	27.4237	23.4219	11.1044	29.104	14.2249	17.5375	0.52063
62.7	12.0288	25.9207	15.605	41.9325	25.6983	23.0656	23.6416	35.3333	24.2139	19.9525	9.52056	26.4533	14.4722	15.7891	-0.85985
62.8	9.39109	23.4748	16.014	36.9991	25.7161	20.9627	19.6787	35.2265	21.7653	16.7844	9.64806	24.3035	13.7354	15.6398	-0.08865
62.9	6.51144	20.5251	18.4812	33.5028	23.7432	21.5069	16.0093	35.3377	20.4355	15.9366	11.5799	22.9955	11.7524	16.0821	1.48269
63	3.95937	16.7452	20.9171	29.9847	21.4807	23.0572	13.3507	33.8126	20.1355	15.8724	13.7202	21.717	9.99052	15.8558	1.93585
63.1	1.82845	13.997	21.3811	25.698	18.763	23.0364	11.3609	30.3229	21.263	16.7073	13.8563	20.7715	9.85396	14.7706	1.66285
63.2	0.35839	13.3909	20.1778	22.2677	15.3825	25.6	10.291	26.4607	21.0399	16.5859	11.8074	18.1599	8.68363	13.5953	1.67163
63.3	-0.34583	13.3773	19.3061	19.4673	11.0327	29.9825	10.5651	23.3201	19.2484	15.9915	7.78734	15.394	7.26159	12.3238	1.1963
63.4	-0.92906	12.0699	18.3755	16.7366	8.02681	33.383	14.1423	20.3402	16.4251	16.7622	4.04699	12.7528	5.77565	11.101	-0.3579
63.5	-0.72134	10.3836	15.7276	16.0514	6.17056	33.5	17.8621	17.031	14.5854	17.1312	1.2368	10.0975	5.02351	9.48204	-2.92126
63.6	-1.19272	8.90667	12.8451	16.7665	4.18355	30.6637	19.0777	14.3217	11.8394	16.3219	-2.16477	7.61584	4.78745	7.00288	-5.01681
63.7	-2.42767	7.88728	10.8415	16.2128	2.74071	24.922	17.6051	13.2286	7.25806	13.9292	-4.41333	6.38196	4.83538	5.95583	-7.08046
63.8	-4.02443	8.08303	10.8063	14.3362	2.59306	16.5415	15.1502	13.8519	1.4989	12.0958	-3.72834	4.66854	4.49211	5.46867	-8.51856
63.9	-5.75358	7.4908	11.2933	12.6107	2.71103	7.61463	12.4975	13.9938	-2.42946	11.1242	-3.24615	3.06697	3.92446	4.69491	-9.87852
64	-7.07641	7.46055	9.86031	13.4027	3.30427	1.51782	7.58506	14.8993	-2.5213	10.3255	-3.10426	1.85534	3.91149	4.24453	-9.72605
64.1	-7.55122	8.60927	6.74717	14.2637	4.39671	1.39768	2.33774	15.783	-2.45156	9.64	-3.13483	2.04864	5.76324	3.70699	-8.44257
64.2	-9.23015	9.22613	3.77245	12.6412	4.3212	3.27186	-0.94488	16.0515	-4.1325	8.41619	-4.52771	4.01217	7.6686	3.20994	-7.99149
64.3	-10.7139	9.98014	1.28101	8.84509	4.51748	5.6036	-1.09522	14.3488	-5.57224	7.7132	-5.54745	6.4158	10.1928	3.02705	-8.41201
64.4	-10.6306	9.87565	-0.2028	6.66043	5.15126	7.91237	0.09801	12.6639	-5.10365	6.54427	-6.92581	8.09122	10.9503	2.15624	-8.85889
64.5	-10.3555	9.39021	-0.91499	7.71461	5.70673	13.4628	0.78662	12.1979	-4.5242	5.4454	-8.74623	10.2355	9.22769	1.05873	-9.01142
64.6	-9.85904	8.55206	-1.65507	7.91057	5.7646	17.9665	0.11055	12.7526	-4.59141	3.61786	-9.39132	12.9581	7.96223	-0.10952	-9.53238
64.7	-10.3133	6.31961	-1.54354	4.58522	6.50504	19.5555	1.29181	12.3093	-5.40414	2.10794	-8.86355	14.1029	6.11251	-0.1868	-10.6244
64.8	-10.8007	2.54175	0.37389	0.44044	6.44494	18.0062	1.86067	10.1426	-6.42853	1.06396	-8.17689	13.6461	4.21616	-0.29573	-12.0209
64.9	-8.99618	-0.90761	2.05263	-1.42298	5.93029	14.3968	2.1777	7.69054	-6.91817	0.16946	-9.87053	11.591	3.00495	-0.3502	-13.3267
65	-6.73172	-2.33986	3.55087	-1.46416	5.03059	10.6422	1.93537	6.55647	-5.84235	-0.05242	-12.3729	9.45874	0.494	-1.6384	-13.747
65.1	-5.61548	-1.82176	5.00044	-3.50846	3.97531	7.80372	1.82931	5.7157	-4.69406	-0.13066	-14.2514	7.64412	-2.88724	-3.24865	-14.197
65.2	-5.02197	-1.56177	6.31134	-6.21353	2.11936	5.15857	1.90686	4.16437	-4.32488	0.16595	-14.5533	6.07327	-4.86753	-3.5765	-14.73
65.3	-4.85762	-3.65949	7.49751	-7.39004	0.36566	1.67034	1.96939	3.27235	-3.99338	0.76034	-13.288	4.7741	-4.98406	-3.17831	-14.9221
65.4	-4.84278	-4.21961	7.43001	-5.84706	-0.64055	-2.90227	1.42333	1.99704	-3.53783	0.01765	-12.5285	4.23162	-6.98794	-2.28183	-15.318
65.5	-5.89169	-3.08717	6.10321	-4.56279	-0.67845	-5.72607	0.69843	1.03587	-3.32258	-0.82197	-11.0232	2.75069	-9.83713	-1.84039	-15.8437
65.6	-7.79661	-0.55833	4.92096	-4.10195	-1.49337	-8.1602	-0.18386	0.57194	-4.02565	-1.22368	-8.72306	0.64708	-10.9441	-2.21853	-16.5971
65.7	-10.1421	1.26115	4.02167	-3.38791	-2.03519	-9.05132	-0.76565	0.48924	-4.65898	-1.379	-5.86648	-0.65271	-11.2721	-1.14325	-17.0266
65.8	-9.67414	2.60717	2.99447	-0.9634	-2.50296	-7.93768	-0.5005	-0.22882	-5.77563	-2.37159	-3.0269	-2.00416	-10.2007	0.55721	-16.9145
65.9	-9.22217	4.99094	1.48082	1.73359	-2.69909	-6.33825	-0.39217	-0.77753	-6.03803	-3.9364	-1.31933	-3.08788	-9.0953	0.94418	-16.2535
66	-9.72094	9.13987	-0.11794	4.28257	-2.54777	-3.8707	-1.21173	-0.36673	-5.83267	-5.30618	-1.24236	-4.47697	-8.82226	1.17089	-15.6672
66.1	-10.7356	12.2409	-1.21949	5.99794	-2.68234	0.13674	-3.02001	0.944	-5.41922	-6.22521	-1.44822	-4.66985	-8.15341	1.18553	-15.0444
66.2	-10.8828	12.7183	-1.50343	6.86232	-3.76466	4.73129	-5.91964	1.38605	-5.18068	-7.09636	-1.83894	-3.83952	-6.91958	0.3748	-14.2194
66.3	-9.59539	12.1257	-2.39049	8.56032	-3.53019	8.43472	-8.72291	2.021	-5.27547	-8.25478	-2.54588	-3.41705	-5.92676	-0.53556	-13.5207
66.4	-8.85008	10.4229	-4.37249	9.36214	-2.81296	9.27883	-10.3316	2.58283	-4.8355	-8.46848	-3.36166	-2.68038	-6.29857	-2.3632	-13.4833
66.5	-9.55088	6.58432	-6.6673	8.83603	-2.78108	7.11214	-10.8897	3.83106	-5.40175	-8.12983	-4.72149	-2.26618	-6.01921	-3.57403	-14.0978
66.6	-10.3281	4.37408	-8.60284	7.99331	-3.7225	5.39467	-10.9708	4.04542	-6.78929	-7.11154	-6.7218	-1.48548	-6.18934	-4.23106	-15.5836
66.7	-10.1786	0.93286	-10.0788	6.49043	-4.90823	4.90262	-10.7173	2.97529	-6.94967	-4.42686	-8.35241	-1.88212	-5.7529	-4.21727	-17.4183
66.8	-9.85334	-1.92603	-9.87754	3.30081	-6.15655	3.08068	-10.4027	2.09891	-7.30973	-2.91227	-9.80561	-2.64436	-5.47524	-3.66338	-19.4101
66.9	-10.3989	-4.1058	-8.84081	0.69752	-7.17464	0.18166	-8.0269	1.37771	-6.28793	-3.68066	-11.1349	-2.93736	-5.8288	-2.29134	-20.0997
67	-11.6852	-5.29236	-7.82853	-0.725	-7.38708	-1.04376	-5.00372	1.42063	-4.90566	-5.03993	-11.8508	-2.42741	-8.13135	-0.88327	-19.7679
67.1	-12.3837	-3.85197	-6.33933	-0.73518	-6.63107	1.61184	-1.32026	1.73123	-4.17979	-6.175	-13.2925	-1.70166	-10.6976	-0.50666	-18.9282
67.2	-12.3632	-2.34922	-4.62538	-1.86313	-6.19503	4.79919	0.60206	2.33035	-2.12321	-5.37041	-14.2746	-1.30102	-12.1216	-0.45837	-17.7328
67.3	-12.3187	-1.79933	-4.13868	-4.28171	-6.13406	5.60047	1.36536	3.02154	-1.01989	-6.01968	-13.4543	-1.29088	-12.1583	-0.28147	-15.3267
67.4	-12.0847	-2.14807	-4.84721	-7.02623	-5.92075	2.98874	1.09832	2.38659	-1.2324	-7.65572	-12.1693	-1.31573	-11.283	-0.84715	-12.869
67.5	-12.2742	-1.64041	-5.91036	-7.52185	-4.79188	2.56982	-0.1371	1.64623	-2.12609	-8.16603	-10.8564	-1.31692	-10.1078	-2.29201	-11.564
67.6	-11.9831	-0.13535	-6.66388	-6.82929	-3.70311	4.24864	-0.90192	1.9133	-3.90722	-6.44942	-9.90182	-2.41187	-7.797	-4.24912	-12.7472
67.7	-10.844	0.77559	-6.66143	-7.90233	-2.63872	4.61219	-4.51202	2.22119	-6.9823	-3.99595	-9.84398	-3.75755	-5.30437	-5.48	-15.2323
67.8	-9.61023	-0.54789	-7.87524	-9.67793	-2.20503	4.34475	-9.86178	3.1632	-9.52038	-2.47553	-10.4266	-4.04208	-4.19673	-4.98618	-17.2951
67.9	-9.09205	-2.17975	-8.44582	-8.63841	-1.84318	2.25642	-15.1163	3.37651	-11.7397	-1.19683	-11.6532	-4.36038	-3.21526	-3.08554	-19.0601
68	-8.11391	-2.45382	-8.54047	-5.42885	-1.42478	1.62542	-17.8871	3.00842	-12.0608	0.88996	-13.1629	-4.53523	-2.75117	-2.52984	-20.3963
68.1	-7.2031	-1.45675	-7.64926	-2.23348	-1.90136	1.22322	-17.7238	3.92563	-10.7448	2.41156	-15.0192	-4.2648	-3.73928	-3.48705	-20.7469
68.2	-6.39959	0.18314	-6.79301	0.24682	-3.04743	0.34881	-15.7591	3.73565	-8.40548	3.18929	-16.8045	-3.72808	-6.15066	-4.4205	-20.4645
68.3	-5.86429	-0.35707	-6.59149	2.24466	-3.29277	-2.37679	-12.6966	3.61295	-6.1044	3.47772	-17.756	-3.14184	-7.32756	-5.11907	-19.6343
68.4	-5.74217	-1.71529	-5.85264	3.38746	-4.37082	-4.94464	-9.39498	3.21382	-5.35917	3.52677	-17.4367	-3.83531	-7.55697	-5.71222	-18.7296
68.5	-5.89283	-2.69058	-5.24121	2.40752	-5.38012	-6.52839	-7.25941	1.87476	-5.47212	2.67197	-15.6228	-5.40159	-6.87546	-6.58855	-18.4123
68.6	-5.92593	-3.51058	-4.72052	1.26556	-6.30757	-9.01789	-6.09906	-0.00468	-4.9126	-0.18438	-13.5921	-6.06861	-8.19849	-9.05117	-18.4931
68.7	-5.53558	-3.84481	-4.97879	-0.13044	-7.18185	-10.0448	-5.2795	-1.86807	-3.56463	-3.67715	-12.3083	-5.74884	-9.49622	-10.4404	-19.2184
68.8	-5.19089	-4.02605	-6.78079	-0.91975	-7.26956	-9.36995	-4.76063	-3.0311	-3.63676	-6.16682	-11.7614	-5.5741	-8.84967	-10.2087	-19.7324
68.9	-4.96262	-4.37843	-8.80901	-1.04488	-6.32696	-7.33489	-6.1386	-3.79396	-4.7471	-7.66272	-12.4615	-5.05511	-7.42341	-8.83178	-19.3617
69	-5.78896	-5.01894	-11.8884	-0.2136	-5.2329	-6.37482	-7.93129	-3.52398	-5.01924	-8.85151	-13.5551	-4.3252	-6.48622	-7.36991	-17.9764
69.1	-7.22707	-5.92967	-13.8313	0.87831	-4.04158	-7.60129	-8.91203	-3.25983	-4.60362	-9.0255	-16.0269	-2.58542	-6.666	-6.94311	-16.7799
69.2	-8.03401	-5.1055	-14.7778	2.0735	-3.32097	-7.20639	-7.31339	-3.71604	-4.30481	-9.10958	-18.3157	-1.09722	-7.1764	-7.15004	-15.9958
69.3	-9.92296	-3.80182	-14.2363	1.37561	-2.9343	-5.10343	-4.91059	-4.0631	-4.03779	-9.64091	-19.8821	-1.30201	-8.04604	-8.16781	-15.2919
69.4	-11.8313	-2.31876	-13.1641	0.14606	-2.10439	-4.60616	-4.07145	-3.78666	-4.05652	-9.9457	-19.1551	-2.75643	-8.75787	-8.04395	-14.1606
69.5	-14.3206	-3.29999	-11.8928	-1.00524	-0.79275	-5.83053	-3.38189	-2.44261	-4.67139	-10.2108	-17.574	-3.77143	-9.76999	-8.42769	-13.1062
69.6	-16.3511	-5.45798	-9.81273	-1.2209	-0.28664	-7.05491	-3.30644	-2.07326	-5.73613	-10.5529	-15.6698	-4.42629	-9.84557	-8.79119	-12.8749
69.7	-17.1112	-7.0641	-8.08753	-2.73522	-1.79543	-6.53675	-3.55884	-3.12193	-6.93361	-10.073	-13.3729	-5.74032	-10.7165	-8.42123	-13.6681
69.8	-16.4504	-7.23555	-6.86003	-4.43616	-3.08636	-3.8801	-4.47306	-4.73971	-7.21424	-8.99748	-12.1626	-6.86806	-11.7043	-7.40917	-13.9501
69.9	-16.2792	-7.0322	-7.17797	-5.22822	-3.07078	0.50551	-6.50656	-5.30592	-7.04292	-7.776	-11.6856	-7.13673	-11.312	-4.88419	-14.3103
70	-16.0646	-7.15526	-8.10563	-5.39958	-2.10188	6.68695	-8.68395	-5.46611	-7.60559	-4.83557	-11.7926	-6.36067	-9.04607	-3.07765	-14.4631
70.1	-15.0636	-6.48648	-9.58259	-6.63674	-0.63832	14.6214	-8.11109	-5.52298	-8.92865	-2.40896	-12.4331	-5.07314	-6.31836	-1.87271	-15.1273
70.2	-14.0318	-4.34872	-9.82496	-8.28954	-0.39386	22.4325	-6.76011	-8.62294	-7.92257	-0.62696	-13.1629	-3.52267	-4.3847	-1.46996	-15.2733
70.3	-13.3025	-0.4599	-8.83714	-9.0097	-0.97239	30.4213	-3.88823	-10.6249	-4.75355	1.28	-14.0854	-1.73965	-3.52042	-2.45484	-14.7675
70.4	-11.8701	5.30076	-7.33914	-7.90696	0.77588	37.24	-0.08331	-8.83563	-1.5785	1.79264	-15.3594	0.7752	-2.32584	-2.73383	-13.9351
70.5	-10.7881	11.5389	-5.80568	-5.34924	4.63397	41.6214	5.26227	-4.49411	1.21286	1.77746	-15.3716	3.29738	-0.12547	-1.5077	-12.9381
70.6	-8.74051	15.7822	-4.2979	-1.3987	9.35327	45.1692	13.1464	1.2196	3.24158	4.02541	-12.6443	5.51841	2.49172	-0.42852	-11.9941
70.7	-5.85288	19.1752	-1.53009	5.50078	14.0217	48.2197	21.0445	6.66083	7.04288	8.20015	-9.43938	7.63065	4.92645	0.13364	-11.0599
70.8	-2.02248	22.2011	3.41929	16.3359	20.11	52.8393	28.228	13.4107	12.0373	11.8132	-5.95011	11.4584	6.45496	1.8129	-10.4271
70.9	2.503	24.2096	9.55142	27.0368	26.8762	58.4294	33.7473	21.5557	16.0245	15.1332	-1.65652	15.9453	7.76777	5.84309	-8.94395
71	7.79775	26.4717	15.6434	36.0196	32.9813	62.1987	38.5425	31.5711	19.0976	19.1292	3.02472	19.8149	10.958	11.426	-6.34357
71.1	14.1323	30.5212	20.7205	42.0913	36.8492	64.7112	41.9046	39.0097	22.8834	23.5819	9.12422	25.108	14.3146	15.9726	-3.4687
71.2	19.7466	35.7173	26.5586	47.1961	39.4321	67.2351	44.509	44.959	27.8545	26.4616	15.0274	31.4791	17.094	19.5952	-0.12326
71.3	25.7969	41.2316	34.4346	51.297	40.8571	73.4322	46.6773	50.3321	33.1742	27.1623	20.0948	38.5817	18.532	23.7374	3.86552
71.4	32.5675	45.7888	42.951	53.5587	41.2031	80.0932	47.9655	55.3126	39.7093	27.3982	25.1915	45.0167	20.8051	27.8688	8.58733
71.5	37.529	50.9604	51.2547	54.4991	40.9261	83.3913	47.211	59.9809	45.4292	29.9194	30.8438	49.7975	25.918	30.9664	12.9621
71.6	39.6279	56.0292	57.7569	55.6676	39.4938	82.9859	49.5474	63.2049	49.7598	33.8851	35.917	53.8107	31.5562	32.2633	16.0934
71.7	40.5159	60.5823	62.7884	58.6952	38.3096	82.077	51.7767	67.4674	53.0322	36.6527	39.3702	58.9435	34.694	31.6816	17.6363
71.8	41.5169	62.5563	67.2232	62.6489	37.5818	81.7532	52.3026	74.6933	55.2272	39.1891	40.8765	64.2686	35.599	29.7682	18.2062
71.9	41.6675	60.5973	70.0818	65.5485	36.2464	81.4199	51.424	80.2839	57.6528	43.7749	41.1553	67.278	35.0762	26.4551	17.8904
72	39.7946	58.0724	70.0025	67.0448	33.8601	81.0042	49.4332	83.6503	58.4706	48.9492	40.5209	67.4753	33.4099	22.4941	16.3411
72.1	38.0643	55.8077	68.2935	68.0249	30.1461	80.5821	46.2133	86.3957	57.3441	52.7596	38.9299	67.3434	29.9653	19.5896	13.3751
72.2	37.3817	53.2169	64.9876	68.9745	26.0972	81.4116	43.247	90.9959	53.593	54.0757	37.2488	65.7546	27.1073	17.757	10.1258
72.3	37.6762	49.1815	61.477	68.9732	24.0929	79.9898	39.7141	94.7344	49.6063	52.9967	35.2386	63.6281	23.6265	16.9901	7.26025
72.4	36.8088	45.2651	57.4558	66.0297	23.6803	77.6528	37.3335	94.6146	46.857	50.2081	34.4677	59.8611	20.9178	16.5511	4.45958
72.5	34.3275	41.9731	53.9286	62.8617	23.0467	76.6718	36.1665	89.2584	45.5409	48.1003	34.7881	54.4108	20.1373	16.9165	2.09471
72.6	31.5254	40.4663	49.8293	61.1619	21.4957	74.6963	34.5629	83.7915	43.3928	46.0146	35.2442	48.8001	21.0072	16.9952	1.4585
72.7	29.164	39.1245	45.9727	58.6108	20.1266	70.6252	32.8782	80.671	39.5714	42.0956	33.414	44.2499	21.5518	16.3353	2.22789
72.8	27.0251	36.8721	42.3557	53.4157	19.5674	63.8054	32.6345	78.3445	35.2018	36.9773	29.6502	41.0814	20.0709	16.0443	4.4497
72.9	23.004	33.5738	38.764	47.3197	19.1014	58.5882	33.8519	74.6264	33.5542	32.5083	24.5326	39.2219	15.1472	14.6401	8.00388
73	19.8014	31.114	35.0492	41.8252	18.368	56.9042	35.4718	70.6422	33.1258	29.2864	18.9186	37.7845	11.0592	13.2439	11.3792
73.1	18.6635	28.1143	31.0433	38.7081	16.6281	54.1838	33.9663	66.2521	30.5406	26.5375	14.1343	33.9777	7.23678	11.5742	13.1671
73.2	18.6555	24.8867	27.6108	38.254	15.0719	50.7405	31.3685	60.9998	26.2645	22.7516	11.1399	28.3107	5.04338	10.3247	13.271
73.3	18.2138	21.9029	25.6885	38.3416	13.4633	48.531	29.7655	55.5494	21.8371	19.6314	10.2576	22.2818	3.50886	8.82016	11.8477
73.4	18.6977	18.5564	23.4851	37.4509	11.7606	48.3492	29.1717	50.9125	19.1841	16.7844	9.95379	17.7372	3.69562	7.86266	9.9292
73.5	18.2355	16.8461	19.9971	36.9239	11.1381	47.8457	29.1852	46.4664	17.244	14.2562	9.06578	14.5737	5.69918	6.69527	6.86821
73.6	17.8577	15.6336	16.9722	36.3238	10.0459	45.212	28.6319	40.5431	14.6881	11.3333	6.05447	11.6111	7.25924	5.03949	3.10689
73.7	17.1226	13.5765	14.8997	36.623	8.06615	42.7256	26.7691	35.9952	11.1789	8.68828	4.77954	10.9031	8.55827	3.81916	0.08717
73.8	15.9379	10.3848	13.8588	36.0529	6.69942	41.0573	25.1528	33.2191	7.90247	6.3329	4.27823	12.0579	8.95708	3.66935	-2.38948
73.9	13.7157	8.33773	12.9901	31.8295	6.82107	40.7157	24.3013	32.6271	3.91806	4.08029	3.65321	14.9866	7.24983	4.00148	-3.72777
74	11.0974	6.833	12.2234	24.733	8.26317	41.6444	22.9383	31.488	1.15575	3.07485	1.3827	18.1998	5.2749	4.74463	-4.66061
74.1	9.02014	6.26715	11.6877	20.6623	8.82394	41.6068	20.496	28.3087	-0.88097	3.92381	-1.80251	20.1648	3.25302	6.19984	-5.64783
74.2	7.78063	5.50973	10.9875	17.3886	7.81627	38.4079	15.9312	25.1473	-1.59737	5.12427	-3.48754	20.7655	0.88722	7.3697	-6.2655
74.3	6.97027	4.94169	10.2531	14.0476	5.79063	34.5353	10.6919	23.3139	-3.66215	5.4022	-3.1039	19.9209	-1.09469	7.21685	-7.34725
74.4	6.0355	5.17363	8.40023	9.67805	4.5213	32.0604	6.35305	22.239	-4.25872	5.43139	-3.16351	17.9817	-2.28156	5.70374	-9.57535
74.5	3.61125	7.12233	6.42629	5.51908	3.27944	30.4923	3.93067	20.6026	-3.2351	5.8366	-4.80543	15.2571	-2.77996	2.92344	-11.8976
74.6	2.0533	7.64418	4.25573	3.57679	1.95898	30.5519	2.06081	18.6332	-1.64999	6.32123	-8.18834	13.1627	-2.35779	0.95369	-13.8031
74.7	0.27393	6.55584	3.25739	3.10877	1.57804	29.8613	0.21889	16.7096	-0.70375	5.53415	-10.2968	10.7029	-1.11529	-1.36616	-14.5981
74.8	-0.98271	4.1416	2.36641	2.25946	1.33828	27.8848	-0.91941	14.4465	0.02015	3.37029	-10.4717	7.71039	-0.59427	-4.25739	-13.7576
74.9	-2.78834	2.76512	2.51634	2.99405	3.09667	26.1391	-1.43087	11.6431	0.27469	1.84052	-8.51494	4.2508	-1.36335	-6.38123	-13.1565
75	-4.89642	3.18414	2.9458	3.93412	5.40232	28.1083	-0.99448	8.26237	-0.33794	1.14921	-6.32789	1.12521	-1.24017	-7.51354	-14.1296
75.1	-6.51829	3.49439	3.15344	5.14817	7.03731	30.3764	0.6435	6.46897	-0.73336	1.16556	-4.65525	-1.1783	-1.63801	-8.19186	-14.1787
75.2	-6.26377	3.8572	2.65085	5.77672	6.9731	32.7739	3.4633	6.68708	-0.98986	1.9573	-3.45999	-2.74369	-3.46446	-8.74214	-13.6301
75.3	-4.91811	3.8109	1.23478	5.54387	5.96703	34.5342	5.68878	7.22141	-0.67232	3.15659	-0.85733	-4.60847	-4.73162	-9.6985	-13.1791
75.4	-4.37026	4.83656	0.98703	5.08093	5.38202	35.1569	6.25441	6.72729	-0.34713	4.21809	1.68419	-6.37262	-5.28329	-9.64736	-13.1749
75.5	-4.36341	6.50712	0.85007	5.77714	4.35245	37.1689	7.25624	5.38343	-1.2023	3.93782	2.26967	-6.47834	-5.25264	-8.35564	-13.4776
75.6	-4.14313	7.21252	0.32938	7.02429	2.25733	39.484	7.74604	4.96284	-1.92831	4.17955	1.94388	-5.42045	-4.89972	-8.24519	-12.7701
75.7	-3.0109	5.73969	0.10046	7.30551	1.08334	38.9888	7.40431	4.34518	-2.81393	4.05927	1.16458	-4.28294	-5.00328	-9.05868	-10.9538
75.8	-1.56252	4.69006	0.73831	7.94807	1.17604	37.8762	6.92553	4.36497	-3.32876	3.72646	1.48825	-3.2369	-3.7019	-9.60991	-9.41232
75.9	-1.44153	4.09375	1.76575	7.64546	1.99758	35.1307	5.4493	3.7394	-4.2282	2.2796	0.48644	-1.30346	-1.71667	-9.3831	-7.48939
76	-2.73697	2.75994	3.16812	8.00279	1.74989	34.4914	4.40318	3.15882	-5.68491	-0.86051	-2.6755	0.85972	-0.47984	-9.56133	-5.40887
76.1	-4.28694	1.93598	3.2004	6.93315	0.78643	33.15	4.57385	4.77869	-8.48791	-4.15827	-5.70701	3.15351	-1.28753	-10.7808	-4.41271
76.2	-5.14067	0.77955	4.12806	4.25035	0.55475	29.9491	4.79414	6.97122	-10.6147	-6.34082	-7.42662	4.48178	-2.59028	-11.8929	-4.70627
76.3	-5.66798	0.92076	4.73533	1.01427	0.81874	28.9138	4.42865	8.43923	-12.0818	-7.85891	-9.04731	5.79909	-3.42894	-11.7214	-5.81289
76.4	-6.72031	1.29568	3.14268	-1.74785	0.38124	29.4529	4.51303	8.93544	-12.079	-9.06754	-9.67445	5.86676	-3.37769	-10.2157	-7.692
76.5	-7.63682	1.10817	0.88456	-3.90538	-0.17703	28.3904	3.81169	8.09863	-12.0265	-9.64208	-10.2117	5.28015	-3.0015	-9.38577	-9.43973
76.6	-7.77607	1.362	-0.76556	-5.71194	-1.09656	25.7264	3.58152	6.9656	-11.8101	-8.80129	-9.98996	4.33859	-4.06122	-8.68359	-12.0981
76.7	-6.95315	0.67903	-3.31742	-6.85432	-0.71577	21.3262	1.86391	5.80153	-9.67045	-6.90718	-10.6484	3.05787	-5.37598	-6.67096	-14.3421
76.8	-5.78211	0.05468	-6.75951	-7.68116	0.92848	17.2185	-0.30455	4.81181	-6.063	-4.54597	-11.5331	2.27042	-6.98105	-5.4051	-15.4866
76.9	-5.11442	-1.42816	-9.91814	-8.01411	1.12357	16.1686	-2.60396	5.16616	-4.07167	-3.42492	-12.0565	1.62341	-8.14797	-5.62087	-16.1078
77	-4.71723	-2.83643	-11.4751	-8.27432	0.95006	13.7773	-2.99283	6.63021	-3.37008	-2.74645	-11.7765	0.35434	-9.96542	-7.29615	-15.8818
77.1	-4.24128	-3.79951	-11.841	-7.17924	0.59835	10.9838	-3.27964	7.15558	-4.14064	-1.48176	-12.3942	-1.3335	-11.9293	-8.40336	-16.0592
77.2	-3.75621	-3.32573	-11.3853	-5.24545	-0.7221	10.3058	-4.04313	7.9851	-4.9427	0.02699	-12.7547	-3.96525	-11.9776	-8.35403	-16.0087
77.3	-3.47087	-3.03143	-9.68702	-4.96087	-1.9572	12.2896	-3.18194	8.03926	-6.14993	0.19398	-12.6887	-5.73455	-10.7691	-9.29622	-16.2344
77.4	-2.75752	-2.66289	-6.97718	-5.76862	-3.09093	15.1301	-1.6943	7.82011	-9.46516	-0.62346	-12.1162	-7.03735	-9.78061	-10.5999	-16.9482
77.5	-2.42082	-2.27631	-4.76479	-6.56871	-4.74621	18.1284	0.80277	7.82303	-12.0493	-1.64058	-10.7703	-7.28684	-8.00849	-10.521	-18.1395
77.6	-2.16401	-0.68075	-4.2326	-6.46987	-6.27367	18.1963	2.26266	6.22066	-14.0586	-2.80367	-8.8429	-5.20724	-7.78979	-8.38492	-19.8154
77.7	-2.16858	0.78812	-6.01748	-5.63009	-7.62042	18.8858	2.5088	6.07546	-14.0563	-3.26143	-7.34082	-2.10079	-6.49506	-6.55052	-19.8353
77.8	-2.92872	1.29985	-7.73584	-5.23438	-7.9022	19.0321	2.7536	6.57501	-14.4321	-5.07146	-6.57568	0.83518	-6.38388	-6.27077	-18.4406
77.9	-5.03338	0.84037	-8.64564	-5.26683	-7.83784	18.7385	3.24359	5.49551	-14.7567	-5.26531	-7.19326	3.61767	-7.65833	-6.19663	-16.7798
78	-7.31153	-0.28405	-9.17049	-5.09464	-8.10213	17.0994	3.2012	4.2127	-14.7143	-5.08431	-8.29339	5.24294	-9.41018	-5.62753	-14.6014
78.1	-8.19609	-0.74145	-10.8358	-4.51315	-8.05482	16.0923	2.28623	3.29006	-14.7012	-4.75383	-8.96079	6.39142	-10.2445	-4.15178	-11.4546
78.2	-7.56606	-1.57563	-12.3174	-4.89443	-7.14806	15.0664	0.89476	2.07516	-14.5239	-4.18396	-9.0158	6.02862	-10.6566	-3.77859	-8.42266
78.3	-6.7945	-2.33327	-12.0721	-4.53435	-5.45561	15.898	0.39774	1.15336	-15.3625	-4.02631	-9.88009	3.58134	-9.42502	-5.12829	-7.46831
78.4	-5.84717	-3.03251	-10.9471	-4.84354	-3.08766	17.629	0.53497	-1.07063	-16.0641	-2.806	-11.0789	1.60595	-7.7863	-5.75699	-8.17955
78.5	-5.22285	-3.22607	-10.6308	-5.46233	-2.43992	16.7933	-0.15383	-3.26754	-15.9913	-2.24431	-11.7427	1.5415	-6.6926	-4.67307	-9.124
78.6	-3.94567	-2.56125	-10.8827	-6.20919	-2.65573	16.7818	-0.24924	-2.76675	-15.5654	-3.42375	-12.7016	2.07208	-6.48249	-3.77241	-9.43492
78.7	-2.41854	-1.68275	-11.1836	-5.72716	-2.77503	16.6063	-0.26977	-0.66066	-15.4467	-4.87061	-13.4263	1.75627	-5.98207	-3.79855	-10.2771
78.8	-2.12292	0.19942	-9.94994	-5.73967	-2.91989	16.2615	-0.48872	0.97525	-16.184	-5.34005	-12.1648	0.41692	-7.3334	-4.28381	-12.4641
78.9	-3.32477	1.16084	-8.70165	-5.11219	-3.8788	14.8073	-1.24746	1.70977	-16.262	-5.35639	-10.0303	-0.09879	-8.88916	-4.77754	-14.2789
79	-4.69668	0.41739	-7.71578	-4.873	-5.25802	11.4121	-2.81132	2.32743	-15.7902	-4.42452	-9.1158	-0.45587	-9.97053	-5.92962	-15.3334
79.1	-4.97175	-1.66208	-6.35523	-5.56411	-6.82059	8.91214	-2.91452	2.49867	-15.1512	-3.97143	-9.47121	-2.51541	-12.1116	-6.86754	-15.4298
79.2	-4.69554	-3.01426	-5.35249	-6.72876	-6.9108	7.05886	-2.73814	2.68782	-14.621	-3.06525	-10.2301	-5.20735	-13.9028	-7.26335	-14.8225
79.3	-4.26297	-3.64718	-4.8203	-8.33642	-6.96251	6.3913	-2.53458	0.94254	-15.1359	-1.39885	-9.66409	-8.30803	-15.2901	-7.80403	-15.6006
79.4	-4.54032	-3.92355	-5.15904	-10.4708	-7.16305	5.82508	-3.69569	-1.6535	-15.0242	-0.10263	-8.46373	-9.78195	-15.3584	-7.50308	-16.4492
79.5	-5.73075	-3.94411	-6.34985	-11.7975	-7.09429	5.89194	-3.36137	-2.52135	-14.1237	1.14454	-7.76846	-11.1243	-14.5914	-6.25395	-16.364
79.6	-6.15876	-3.53542	-7.5957	-12.457	-6.07354	6.45607	-0.95875	-2.70175	-13.912	2.09276	-8.31346	-12.0832	-12.8748	-4.93504	-15.6942
79.7	-7.51812	0.29105	-7.63042	-11.4177	-5.11728	6.94603	1.45051	-2.28178	-14.2708	1.60814	-9.18708	-11.8565	-11.4172	-3.22546	-14.8254
79.8	-8.82497	5.32661	-6.95272	-8.96366	-3.26236	8.09206	1.69608	-2.60697	-14.2949	-0.57324	-10.2171	-10.6363	-9.47424	-2.2728	-14.7252
79.9	-11.0894	7.60173	-6.86712	-7.47834	-1.73946	10.3528	0.67961	-1.77016	-14.8187	-2.4802	-10.8087	-8.47467	-7.65412	-2.48792	-15.3045
80	-12.4716	6.74752	-6.58562	-7.72939	0.11958	11.9344	-0.69209	-0.07842	-15.058	-4.31125	-11.903	-6.64664	-5.49308	-4.09779	-15.4201
80.1	-12.7684	6.74367	-5.35934	-8.19168	1.33485	12.0149	-0.04378	1.0719	-15.0517	-6.42139	-12.3252	-4.39225	-5.15549	-6.00319	-15.206
80.2	-11.4204	6.29848	-3.20247	-8.30999	1.72784	12.064	0.2149	0.96212	-15.3038	-9.34313	-13.0331	-1.63643	-6.49919	-7.6662	-15.3598
80.3	-9.72893	4.11816	-1.29897	-6.61283	1.69405	11.5625	0.56272	-0.02551	-15.1669	-11.027	-12.8751	0.96008	-8.20879	-8.74889	-14.5341
80.4	-8.25544	-0.07739	-0.2796	-4.85736	0.86384	13.1337	-0.38628	-1.06417	-14.1845	-11.0364	-12.3821	2.23825	-9.17096	-9.79128	-13.5671
80.5	-6.7146	-4.33133	-1.4961	-3.96351	-0.52036	15.408	-0.15516	-0.36735	-12.7255	-9.31628	-11.2377	1.8517	-9.33444	-10.6951	-12.1632
80.6	-3.64435	-6.5299	-3.06013	-1.60223	-3.03741	16.3336	0.07615	1.08107	-10.5735	-6.53583	-10.0222	2.68806	-10.4128	-11.2759	-10.7308
80.7	-0.0468	-6.54816	-3.31546	4.48245	-5.66553	16.319	0.06209	4.38581	-6.54394	-3.85932	-5.5709	4.0669	-11.6623	-10.3607	-9.19321
80.8	2.00536	-5.98429	-0.88956	13.0317	-6.42316	19.6181	0.41599	8.59026	-2.36568	-0.44712	-0.48042	6.38877	-11.3956	-7.793	-7.20407
80.9	2.72442	-4.66697	2.80689	21.6741	-5.89852	24.9189	0.79612	14.1617	3.21499	3.15542	3.14943	8.77425	-7.77357	-4.94018	-4.91279
81	3.82925	-2.55956	6.93916	28.943	-3.91033	30.766	3.27096	21.7734	9.00298	7.6478	5.3184	13.261	-2.63837	-1.96463	-4.28573
81.1	6.24436	2.09098	11.8132	34.7634	-0.86496	35.4201	7.41115	30.867	14.4662	12.7451	7.84257	18.1464	3.01752	0.82375	-3.70558
81.2	9.63534	7.04946	18.1126	40.9285	3.03148	40.629	13.776	38.9834	20.6043	17.506	10.3698	23.8808	9.46212	5.13236	-2.20431
81.3	13.815	12.9184	25.1981	48.0252	8.4736	46.4573	20.0646	45.1673	26.3749	22.072	12.1477	30.5257	16.3901	9.05609	0.85935
81.4	16.6376	17.9976	31.2901	54.5549	15.2169	51.8771	26.265	49.3541	31.3281	26.5434	12.4413	36.6461	22.7481	12.4665	4.55448
81.5	19.3677	22.2609	33.3438	58.5399	21.1662	53.5988	30.4932	53.0602	35.9511	32.2234	11.7095	42.3218	27.823	14.6125	7.96463
81.6	22.156	26.9658	32.896	61.5981	24.9346	53.0587	33.8751	56.7947	40.4178	37.9547	11.3918	46.5187	31.1563	15.6872	10.0623
81.7	24.4068	31.5296	30.5752	63.4587	28.6147	51.9837	36.1925	59.708	45.2639	40.4304	10.6814	49.4934	33.0194	17.088	11.818
81.8	25.7821	34.6485	29.4495	65.9229	32.092	49.279	37.0628	61.3567	49.2363	40.7212	9.75122	52.6024	33.2611	17.9611	13.6294
81.9	26.3528	34.9423	29.246	67.2285	34.5456	45.8608	36.0705	61.92	52.8949	41.7675	8.3005	54.3952	32.4065	18.2012	14.2461
82	24.9272	33.4229	28.3191	67.3805	34.169	40.1191	33.135	62.2368	53.8403	42.509	7.00961	53.146	32.7704	17.7653	12.9011
82.1	22.3934	30.5859	26.4224	66.342	32.1641	36.8513	31.9949	63.0371	52.7595	41.6612	4.67702	51.6771	31.9564	16.4218	10.2643
82.2	19.9589	28.6397	25.3123	64.2594	29.68	36.2099	31.7843	64.7574	51.0288	38.2525	1.62296	51.2593	29.4068	14.9976	7.2962
82.3	18.0323	26.0042	24.7185	60.0981	27.8643	34.482	31.0693	65.714	50.2165	33.996	0.41836	50.468	25.3257	13.131	5.59709
82.4	15.7427	21.1661	23.8327	55.2208	25.5585	32.5138	28.9623	65.3293	48.1038	31.5484	0.51918	49.3685	21.6754	10.5291	4.65188
82.5	14.13	17.2752	22.6758	49.7668	22.1241	30.4652	25.9203	64.3695	45.06	30.0782	1.9208	47.8329	18.9623	8.01931	3.60511
82.6	12.1714	15.5748	20.6471	44.1164	17.8039	27.8848	23.4513	62.7357	40.835	27.6983	3.36692	46.3461	16.2605	6.52474	2.0359
82.7	10.2574	16.0103	18.6813	38.0902	14.1389	24.4895	22.1488	61.5139	36.0401	25.5075	4.99388	46.8943	13.5761	4.88778	1.68285
82.8	9.237	17.0926	17.6516	31.8633	11.6844	20.4654	20.2801	59.7443	31.8865	23.7034	7.75438	45.7876	11.8412	4.01174	1.55104
82.9	9.6924	16.718	17.1877	27.485	8.78723	15.5689	17.7095	56.4793	27.0705	23.4978	10.9581	42.4312	12.4228	4.28931	1.49597
83	10.1718	15.8236	16.4043	27.8076	6.20845	12.8799	15.8835	52.579	22.1458	22.7691	12.7995	40.0205	13.8567	4.55233	1.06268
83.1	8.11733	17.2606	15.5583	29.1206	3.00221	11.0297	14.5559	48.3135	16.8418	20.1417	12.4329	37.5442	14.0791	5.24576	-1.07446
83.2	5.98756	18.9252	14.6233	30.5115	0.8038	12.789	14.9408	44.3374	11.854	16.5835	11.337	34.6193	13.6922	5.57779	-3.2272
83.3	4.27096	18.8609	13.8077	30.5667	0.46208	12.859	14.8207	41.5493	9.48505	13.698	9.67016	30.3819	13.0905	6.02741	-4.51995
83.4	2.74725	18.1398	12.9727	29.7836	0.33705	14.3195	14.2164	38.9403	7.84753	9.85487	8.19099	26.0594	12.0731	6.63282	-4.9737
83.5	1.03635	17.3039	12.1644	27.7821	0.53421	15.2461	12.1858	37.7569	7.13949	5.61706	6.55366	23.5196	9.78682	7.25306	-5.44375
83.6	-0.46339	15.5492	12.2706	24.9432	0.39142	16.0421	9.82593	37.3636	7.32323	1.73426	3.50091	22.9034	7.09973	7.77473	-6.72799
83.7	-0.97814	12.3113	10.4903	21.8696	1.71305	17.1913	7.71772	36.8565	7.74966	-0.33735	0.19992	23.158	5.48136	8.71056	-7.64076
83.8	0.47823	9.76865	9.9914	18.6539	3.59191	16.6	5.15146	36.3055	7.44047	-0.03724	-3.13542	23.1064	5.24765	8.50191	-7.07614
83.9	1.73829	7.93311	10.3747	16.2259	4.2564	13.5265	1.58318	34.835	6.51374	1.34189	-4.6259	23.3465	5.44641	7.32293	-6.14597
84	1.87183	5.85771	10.1144	12.3397	3.3473	13.1964	-1.13247	34.9965	4.9762	1.80899	-4.72505	23.4422	4.6294	6.08416	-6.30085
84.1	1.75883	2.06127	8.2953	8.81035	2.41219	14.0061	-1.12582	33.8066	3.26494	2.99427	-4.98781	21.8981	3.49946	4.91002	-7.12084
84.2	2.50642	-0.64517	5.33991	7.43195	2.38574	12.952	0.59313	31.5645	1.15526	4.45397	-6.84944	18.6466	2.7264	4.18151	-8.44837
84.3	1.39702	-0.56874	1.25924	7.00463	2.50283	11.177	2.25829	29.2601	-2.08154	6.62718	-8.57225	15.6543	3.72384	3.21213	-9.6491
84.4	0.48622	1.13625	-1.962	5.31322	2.76212	9.84609	2.91478	26.6176	-4.53094	6.45318	-8.35989	13.5632	5.26395	2.40415	-10.4405
84.5	-2.04417	1.43692	-3.44459	2.02732	2.06942	8.39606	4.33532	24.163	-6.10538	4.77044	-7.8869	12.1694	4.90739	1.66804	-10.7763
84.6	-3.86692	1.82822	-4.56399	-1.01322	1.89871	7.52166	6.25992	20.6993	-6.33417	2.78407	-7.80805	10.5854	3.11192	0.95692	-10.4278
84.7	-4.85305	3.12045	-4.52119	-2.44275	2.82734	6.64516	6.67579	16.7954	-4.91036	0.85843	-8.41359	8.35105	2.23263	1.25026	-9.30033
84.8	-4.5951	5.43031	-3.85156	-2.48921	2.86862	5.0938	4.88081	13.6876	-3.7495	-1.20734	-8.76747	6.39968	1.61632	1.65511	-8.82741
84.9	-4.35314	5.59405	-3.37782	-2.95681	2.84599	4.187	2.15813	11.8498	-2.50705	-2.51173	-9.67436	6.15165	2.17456	1.55264	-7.60161
85	-4.42961	5.20737	-2.01997	-3.75607	3.35182	5.59107	-0.05974	11.4338	-1.33287	-3.0921	-11.0518	5.90299	2.05633	0.38259	-6.70258
85.1	-4.58141	4.42542	-0.05288	-3.78912	3.85735	6.70471	-1.51374	11.2469	-0.08909	-2.34824	-13.2654	5.55345	0.22323	-1.19648	-6.62435
85.2	-3.64321	4.30445	1.20006	-2.36384	4.84975	10.3141	-3.02134	10.8984	-0.25382	-1.84493	-16.046	4.79001	-0.03181	-2.76044	-8.1223
85.3	-2.36261	4.52001	0.45632	-1.26026	4.92394	13.3301	-3.38797	12.3266	-0.77721	-2.1252	-16.9272	5.60745	-0.60578	-3.46833	-10.1099
85.4	-0.56269	4.13278	-2.30978	-0.41348	4.52742	12.9321	-4.90184	13.5405	-2.83708	-1.19683	-17.9	5.94078	-1.99474	-4.22668	-12.8979
85.5	-0.00685	3.66483	-5.9375	0.83367	5.17633	12.3126	-6.42332	13.6886	-2.68301	0.33177	-19.2094	7.58154	-4.2243	-5.51973	-14.5099
85.6	-0.44627	4.07968	-8.14353	2.58616	5.83464	12.1737	-7.33753	11.9115	-0.87438	0.33411	-19.8638	9.62683	-5.14146	-6.70242	-15.3612
85.7	-0.08674	5.25446	-9.01127	4.75513	4.89117	12.8621	-7.36414	7.92656	-0.26729	-0.38523	-19.7829	9.97206	-7.62209	-6.7972	-16.4614
85.8	-0.09473	5.92753	-9.32139	5.47528	1.53229	12.7984	-6.53089	5.46968	-0.8574	-0.92941	-20.2948	9.87419	-10.0285	-7.11278	-17.2227
85.9	-1.18929	6.01012	-10.1243	4.42325	-1.80219	12.112	-4.98889	4.91201	-1.077	-0.70403	-19.6098	10.079	-12.5638	-7.88416	-17.6303
86	-3.51538	4.92002	-11.5673	2.41396	-3.45864	11.9564	-4.08171	4.25103	-2.20305	-0.37823	-18.5007	11.0813	-12.121	-8.42057	-17.5165
86.1	-6.67922	4.45689	-10.6602	0.12453	-3.07504	13.5067	-2.12955	2.83072	-3.77013	-0.15285	-17.2163	12.8038	-10.7161	-7.77513	-16.9518
86.2	-8.02945	2.85517	-8.73638	-1.30266	-2.5751	13.8661	-0.3475	1.95683	-5.89869	-0.95977	-17.57	13.2897	-9.69936	-7.08407	-16.2806
86.3	-7.3492	-0.1149	-7.28338	-2.45821	-1.97657	13.3583	-0.09472	2.06578	-7.91956	-0.55339	-17.2923	12.4805	-10.6678	-6.29872	-17.0119
86.4	-7.72585	-2.97224	-8.11296	-4.12651	-1.20132	9.97041	0.95577	3.3136	-8.43663	0.45322	-15.648	10.9586	-11.6327	-5.4223	-17.6995
86.5	-7.76465	-4.45155	-10.5851	-5.18004	0.74939	7.10691	1.29618	3.20028	-9.51336	0.70663	-13.3502	8.38791	-12.1624	-4.04484	-17.5804
86.6	-7.39371	-3.74461	-12.0051	-5.22584	2.69496	3.85897	1.47959	2.10807	-9.91208	0.62955	-11.9251	5.54336	-12.4847	-3.29152	-17.2814
86.7	-5.60863	-1.40526	-12.7021	-4.63842	4.11605	1.7278	0.91909	2.09495	-8.75494	1.48552	-12.9668	3.45617	-13.3439	-3.31681	-17.2037
86.8	-3.89089	0.44039	-13.2651	-3.23967	4.40503	1.21068	0.44735	3.063	-7.68915	1.66302	-15.9208	2.96905	-12.7829	-4.61908	-17.7372
86.9	-4.62592	1.08509	-13.4979	-1.95054	2.78958	1.72467	1.05423	4.76161	-6.98384	1.56376	-16.9913	3.24619	-11.2241	-6.12781	-19.1154
87	-7.35833	0.83918	-11.5252	-0.73415	0.78466	1.95032	2.56221	5.08575	-7.46913	1.27065	-15.7842	3.38044	-8.38728	-7.02001	-20.2558
87.1	-8.75078	0.37375	-8.07897	-0.05789	-0.85681	2.14777	1.78465	4.35685	-8.18153	-0.09212	-15.3914	3.41012	-5.03369	-6.95632	-20.6825
87.2	-9.3888	-1.88686	-6.32026	-0.50873	-1.63295	4.29043	0.18164	3.70919	-8.6008	-1.26105	-16.873	3.9814	-2.68719	-6.48845	-20.5655
87.3	-9.96519	-3.64365	-5.84946	-0.98568	-3.28058	5.95462	-1.86517	2.69344	-9.71774	-2.31087	-17.7818	4.95873	-0.27444	-5.8857	-19.9793
87.4	-10.6877	-5.50922	-5.63228	0.11235	-4.37185	6.86873	-2.0693	2.07807	-10.4893	-4.38715	-16.7472	3.96441	0.96271	-5.34692	-18.4326
87.5	-11.2983	-6.74406	-6.11629	1.29287	-5.60372	6.77679	-2.02749	1.5075	-11.2524	-5.69037	-14.4285	1.68885	-0.4942	-5.25396	-15.6546
87.6	-9.84991	-8.03938	-8.64417	0.22725	-5.14241	7.47674	-2.62049	1.1019	-11.6395	-5.97297	-13.5813	-1.14135	-2.57268	-4.22022	-12.099
87.7	-8.17782	-6.89661	-11.3462	-1.894	-3.78832	7.0902	-3.48662	0.95858	-12.5362	-6.6456	-12.7147	-2.8137	-5.4342	-3.14704	-8.61238
87.8	-7.43937	-4.46037	-12.3132	-3.87466	-3.11458	5.82926	-4.44227	1.31668	-13.6044	-6.54985	-11.6083	-3.74061	-7.1794	-3.63658	-6.19468
87.9	-6.6621	-3.61607	-12.0846	-5.1672	-3.52535	4.85143	-5.92401	0.17781	-14.6423	-6.17149	-9.21751	-5.06472	-8.35662	-5.75262	-4.42267
88	-6.51943	-4.20039	-10.9532	-5.84454	-4.10624	3.43378	-7.8834	-0.56088	-15.329	-5.09598	-7.58406	-7.15924	-9.4959	-7.95156	-2.30375
88.1	-6.98511	-5.70367	-11.5286	-7.84047	-5.21073	1.77168	-9.60311	-1.43456	-16.2815	-4.24819	-8.37103	-8.6961	-11.1249	-8.70497	-1.80618
88.2	-8.12646	-6.90881	-11.0101	-9.92885	-5.33693	-1.38955	-11.1852	-3.47898	-16.9437	-4.57983	-8.90976	-7.40545	-11.1129	-8.98653	-2.93352
88.3	-9.63305	-8.82133	-9.82594	-9.55817	-6.26968	-2.87719	-12.1393	-4.13518	-16.6229	-4.54947	-8.58951	-5.93513	-9.60707	-9.47854	-5.26596
88.4	-10.02	-10.2744	-9.1969	-8.11127	-7.3539	-2.94928	-11.6885	-4.15268	-15.5973	-5.21393	-7.71756	-4.78779	-7.73805	-11.0136	-7.38046
88.5	-9.71295	-11.3443	-10.16	-6.14737	-8.22965	-3.06002	-10.2685	-3.44148	-13.9123	-5.91926	-7.54736	-3.74227	-5.78112	-12.429	-9.05239
88.6	-9.29521	-11.5557	-11.6979	-6.33292	-8.97891	-3.01405	-8.13789	-3.48586	-11.4982	-6.22171	-6.04331	-1.95219	-5.42391	-12.9027	-10.2703
88.7	-8.25429	-12.1077	-13.5877	-7.35951	-9.2012	-2.18247	-6.85971	-3.21421	-7.66937	-5.50587	-4.05021	2.04599	-4.77841	-13.3169	-11.4191
88.8	-7.11864	-11.6282	-14.3507	-8.6569	-8.21616	0.92861	-5.65773	-4.71846	-4.09265	-4.45138	-2.80052	4.70632	-4.5241	-13.3869	-12.4463
88.9	-6.46465	-9.92738	-12.7637	-10.2024	-6.50433	6.30668	-4.29345	-6.64914	-2.34253	-3.97376	-2.47167	5.16273	-4.92729	-11.9678	-13.3827
89	-5.96587	-7.96251	-11.3252	-11.5965	-4.10906	10.2389	-3.76982	-9.60266	-3.90168	-3.88268	-2.97924	4.32112	-5.49291	-11.1686	-13.6395
89.1	-5.72391	-6.66477	-11.0742	-11.7746	-2.41235	13.6738	-4.36529	-12.2943	-5.71136	-4.22016	-4.52049	2.31341	-6.14709	-10.636	-14.0067
89.2	-5.13611	-6.67687	-11.3034	-11.6529	-0.92808	19.2911	-5.00809	-13.6069	-6.98539	-4.46306	-5.54484	1.26727	-6.77564	-10.3051	-14.4225
89.3	-6.1405	-7.60168	-11.0099	-10.9101	0.4081	23.6444	-5.4384	-13.7946	-8.29526	-5.5047	-6.80751	-0.08091	-7.07528	-9.55459	-15.7624
89.4	-7.30697	-7.74267	-10.1224	-10.1583	1.63923	24.9837	-4.58539	-14.0794	-10.0755	-7.59967	-6.69984	-2.07059	-6.11911	-8.87465	-17.4698
89.5	-7.69845	-8.43378	-10.4922	-9.44107	1.11166	23.5921	-3.61624	-12.9768	-11.5344	-9.35248	-6.49019	-3.37703	-4.68985	-8.10156	-18.6105
89.6	-6.78423	-9.02842	-10.5937	-8.11608	-0.58635	19.685	-3.22072	-9.97721	-11.3257	-9.63858	-6.18257	-2.95513	-2.54146	-8.01848	-19.42
89.7	-5.17491	-8.92217	-10.6479	-8.30649	-0.89545	18.8168	-1.81538	-6.0819	-8.88109	-8.01889	-6.77112	-1.92999	-1.52367	-7.37447	-19.1221
89.8	-4.0678	-7.93533	-10.0373	-10.8376	0.10297	17.488	1.43208	-3.84874	-6.29888	-6.98893	-6.75814	-1.27254	-0.4646	-7.14035	-18.1215
89.9	-4.48211	-5.52174	-9.44636	-13.8487	0.74763	13.8932	2.66617	-2.8734	-5.16945	-6.06756	-6.49267	-0.60052	-0.99194	-8.32199	-16.354
90	-5.22399	-2.0703	-8.62387	-14.8966	0.44352	10.0592	2.51507	-2.26262	-4.85142	-6.19485	-6.29308	-0.73208	-2.62029	-9.94251	-14.8365
90.1	-4.81196	0.71028	-7.74244	-14.4271	1.03661	6.15729	2.20051	-2.2045	-5.18398	-5.66585	-7.47739	-1.51371	-5.28402	-10.7064	-13.7378
90.2	-3.70599	2.21962	-6.68247	-14.1559	3.00554	4.34162	1.81107	-1.00543	-5.61812	-5.91225	-8.51697	-3.2724	-8.62626	-11.6516	-13.4385
90.3	-3.07596	2.88894	-5.92577	-13.8673	4.5349	2.19582	1.79092	-0.04988	-7.23627	-7.15942	-9.09136	-5.09071	-10.9141	-13.2328	-12.7175
90.4	-4.1728	2.30088	-5.7915	-12.9743	3.28217	-1.85444	-0.43322	-0.88669	-9.48067	-9.19716	-9.74271	-7.0661	-12.945	-14.5504	-12.7113
90.5	-5.76614	1.85216	-4.79438	-11.3918	1.6692	-5.12119	-3.6936	-1.77141	-10.7518	-9.76236	-11.9703	-7.68031	-14.6729	-13.9604	-13.7446
90.6	-5.39748	1.46569	-4.34339	-8.48209	1.37655	-6.95358	-5.50112	-2.04472	-11.4493	-8.35754	-15.186	-8.48444	-15.3631	-11.1528	-15.0257
90.7	-3.27113	1.33888	-3.99145	-5.70283	2.36072	-6.46362	-6.48395	-0.85877	-11.5196	-5.97297	-17.8343	-8.23771	-13.9209	-8.61049	-15.2918
90.8	-2.04075	1.45975	-3.93838	-3.78814	2.32414	-3.95949	-7.50726	0.77901	-10.9826	-3.61993	-18.9583	-6.19855	-11.0564	-7.67704	-14.5058
90.9	-2.66393	1.58457	-4.11667	-3.38926	1.72165	-3.41417	-8.13504	1.72206	-10.1442	-2.84571	-20.0053	-3.48987	-7.92383	-7.02267	-13.8542
91	-4.3383	3.08963	-5.94289	-2.19048	2.10847	-2.22008	-7.43978	1.73914	-7.68585	-2.27701	-19.9694	-1.3346	-6.38802	-6.08047	-13.3203
91.1	-5.329	4.56433	-8.52066	-0.83244	2.74343	-1.10853	-6.02114	0.84817	-5.68358	-2.13337	-18.28	-0.1819	-6.5245	-5.24797	-12.901
91.2	-5.80951	5.66027	-11.4606	-0.38435	2.40671	-0.33964	-5.19549	0.12011	-5.79401	-2.59814	-14.7927	0.65347	-7.49331	-4.61594	-11.84
91.3	-5.75016	6.02881	-13.5718	-0.88884	0.53562	-0.34382	-5.67256	-0.78524	-6.38026	-4.3708	-12.3975	0.97796	-7.9038	-3.95178	-10.8226
91.4	-5.53216	4.57182	-15.1806	-2.16396	-0.21055	-1.56297	-6.65462	-1.66892	-6.54991	-5.45916	-11.9672	0.50503	-8.05893	-2.93715	-10.5361
91.5	-5.08817	2.69372	-16.8811	-3.19097	0.01614	-3.41625	-5.74706	-5.03761	-7.41181	-5.2513	-11.5331	-0.65505	-9.51982	-1.39116	-9.99019
91.6	-3.9023	0.73491	-16.6497	-4.93304	-1.12185	-3.78503	-5.80199	-8.84834	-7.99533	-5.06445	-11.9767	-2.64992	-11.5167	0.03488	-9.90625
91.7	-2.01678	-0.64543	-15.6868	-5.90173	-2.98368	-2.34336	-7.31073	-10.3489	-8.90136	-5.05862	-13.7146	-4.49584	-12.8571	0.97061	-10.449
91.8	-0.53758	-1.73344	-14.1742	-7.64105	-3.22213	1.20964	-9.34519	-9.85534	-11.3459	-5.45799	-17.4112	-4.78971	-13.2194	0.71652	-11.9457
91.9	0.93249	-3.13358	-12.5955	-8.26068	-1.89947	4.90575	-10.7102	-9.8241	-12.305	-5.36107	-19.8818	-4.59127	-12.4237	-1.11435	-13.6152
92	0.43828	-3.57042	-11.2303	-8.95115	0.53826	8.1422	-10.4312	-10.7426	-12.1763	-4.56115	-21.0915	-3.78806	-11.089	-3.53382	-14.9164
92.1	-1.56366	-3.00976	-11.355	-10.8883	1.24109	11.4121	-9.36724	-10.7661	-11.6499	-4.5086	-19.7141	-2.76573	-10.0262	-5.72068	-16.3655
92.2	-3.81213	-2.96083	-11.4191	-12.2212	1.99504	12.6218	-9.27866	-11.4298	-11.5983	-5.72424	-18.766	-2.28796	-8.85064	-7.78122	-18.5125
92.3	-5.27421	-3.41175	-11.5132	-12.731	3.27333	12.3042	-11.1003	-11.0659	-11.9926	-7.78651	-17.5362	-1.9117	-8.46375	-9.97949	-20.3455
92.4	-6.58791	-4.28399	-11.9933	-11.8276	4.37812	11.4507	-11.4334	-9.88347	-14.6605	-8.69503	-14.5065	-1.13947	-9.0314	-11.1891	-20.8107
92.5	-8.27484	-6.83086	-12.7292	-11.4945	4.77876	9.51493	-10.9203	-8.03987	-15.7126	-8.62146	-11.5726	-0.55962	-9.23916	-10.7154	-21.1368
92.6	-9.48011	-9.98052	-13.2455	-11.8603	4.26207	6.8144	-11.7594	-6.36437	-16.7248	-9.58836	-9.78672	-0.34199	-8.4558	-9.46694	-20.4165
92.7	-10.9958	-11.5949	-12.3555	-11.9369	3.56336	2.86443	-12.4965	-5.15447	-16.7429	-10.5997	-9.34867	-1.34452	-9.07308	-7.78892	-18.9236
92.8	-11.8267	-11.9902	-9.36957	-9.81838	2.49516	-0.24666	-13.623	-3.93269	-16.4689	-10.943	-9.10597	-2.44519	-10.5986	-5.44236	-18.0282
92.9	-11.3839	-11.5634	-7.24376	-6.98332	1.38611	-0.68021	-12.9481	-2.63592	-17.1281	-9.15045	-9.03113	-3.72606	-13.2035	-2.29039	-17.969
93	-10.3681	-11.0618	-6.69592	-4.16078	0.0213	-0.90482	-11.8698	-2.45323	-17.6954	-5.69972	-9.34087	-5.13401	-15.0772	-0.42292	-17.737
93.1	-9.30663	-10.9914	-5.88419	-1.36793	-0.96493	-0.79199	-11.2553	-3.04339	-17.7907	-2.46969	-10.2661	-7.18357	-14.8814	-0.68242	-16.8756
93.2	-7.91531	-10.4636	-4.76797	1.09579	-1.91017	-1.1148	-11.4866	-4.11789	-17.284	0.95302	-8.9204	-8.45154	-12.7264	-1.07633	-15.8745
93.3	-6.33796	-8.90205	-4.03132	2.76302	-2.24219	1.07592	-12.5101	-4.46765	-16.3516	3.69026	-5.89159	-8.85275	-10.9286	-0.82805	-15.8341
93.4	-4.64646	-7.3706	-4.01542	2.80906	-2.32945	2.90099	-13.2267	-4.59681	-16.7893	4.92925	-3.55368	-8.08724	-10.4688	-1.96644	-16.0534
93.5	-3.63408	-5.23648	-5.31042	1.56807	-1.92383	4.7783	-15.3345	-5.49236	-17.1313	4.67118	-3.09214	-6.61244	-9.40637	-4.1571	-15.8873
93.6	-3.76305	-4.31135	-6.13756	-0.66622	-1.16605	5.42392	-16.8142	-5.86546	-17.0074	2.43491	-3.0526	-4.89242	-6.5382	-6.77514	-15.5906
93.7	-5.37009	-3.90432	-6.46162	-2.68568	-0.60587	5.78747	-16.5333	-5.06552	-16.0069	-0.41676	-2.53298	-2.56671	-3.82386	-7.5759	-15.4896
93.8	-6.54568	-3.33826	-6.64603	-5.52284	-0.90293	7.42972	-14.9426	-4.49952	-14.2404	-3.92238	-2.84462	-0.89248	-1.96214	-7.01316	-14.7829
93.9	-7.00679	-2.72381	-7.22688	-7.57429	-1.03398	10.4238	-12.8059	-4.4087	-11.4437	-7.26802	-5.92536	-0.74892	-1.87691	-6.94672	-13.2374
94	-6.30143	-1.19248	-8.68599	-8.29379	-1.12596	11.3348	-9.63846	-5.58902	-9.85967	-8.46731	-10.6058	-1.22259	-2.42891	-7.95013	-11.0137
94.1	-5.52645	-2.16996	-8.49107	-9.99048	-1.08219	12.2729	-6.19828	-5.91608	-8.34942	-9.59654	-12.5536	-3.11647	-2.74087	-7.29995	-9.46468
94.2	-5.02654	-3.92333	-7.88722	-10.3527	-1.44698	13.0752	-2.60206	-5.92712	-7.39133	-10.0543	-12.6448	-5.65799	-2.1626	-4.56043	-9.44515
94.3	-5.69537	-8.04432	-8.58181	-9.56461	-2.00025	14.0332	-1.2716	-6.43166	-6.64189	-10.1582	-13.3111	-8.03536	-3.20002	-2.65037	-9.96723
94.4	-6.21012	-10.7182	-8.74689	-9.13305	-1.20928	13.3072	-1.13513	-8.33422	-6.74958	-9.56384	-14.3401	-9.07069	-3.90982	-2.35588	-10.5308
94.5	-6.15191	-12.8479	-8.80975	-8.89512	-0.5085	11.8853	-1.70115	-10.3888	-8.80763	-9.60121	-15.3408	-9.09284	-4.58168	-2.7056	-12.3315
94.6	-6.09827	-13.708	-9.15948	-8.71615	-0.18749	9.5588	-3.01773	-11.7392	-10.5787	-10.1489	-14.6888	-9.66115	-4.19316	-4.03714	-14.8502
94.7	-7.17457	-14.4613	-10.2241	-8.13681	-1.04046	7.42972	-3.92472	-11.8906	-10.8492	-11.2419	-13.4978	-9.82867	-5.149	-5.01594	-17.8364
94.8	-8.3068	-13.5363	-12.7782	-6.621	-1.90548	3.98329	-3.97167	-12.2629	-10.9316	-11.2442	-13.5606	-10.3824	-5.97598	-6.43075	-19.725
94.9	-8.32848	-11.2474	-14.5599	-5.85546	-2.03344	3.74719	-4.51088	-12.467	-11.9537	-10.79	-13.096	-11.1132	-7.42389	-8.31011	-19.9349
95	-7.33893	-7.74959	-15.1008	-5.48754	-1.78912	4.98515	-4.68935	-11.7496	-12.9888	-10.992	-11.5049	-11.4302	-8.17433	-9.09546	-18.5118
95.1	-7.59459	-4.42088	-15.464	-5.03352	-2.08883	4.82949	-3.34654	-9.37976	-12.6483	-10.1909	-10.0737	-12.0614	-8.52092	-9.79898	-16.7567
95.2	-8.77019	-1.86784	-15.489	-4.87533	-3.42647	3.69913	-2.1402	-6.51124	-11.8062	-7.63236	-8.65083	-11.2217	-9.05426	-10.1492	-15.4308
95.3	-8.39582	0.5056	-14.53	-5.56052	-3.85546	2.33163	-0.91352	-4.05768	-11.0642	-4.59618	-6.93771	-10.3255	-9.3449	-10.2524	-13.2099
95.4	-7.00337	1.27303	-12.4387	-6.88569	-3.62848	1.078	0.3202	-4.29225	-10.795	-3.22173	-7.0011	-9.80149	-8.97536	-9.22911	-11.7873
95.5	-5.29476	1.52697	-11.3252	-8.11501	-2.67267	0.97458	1.15173	-5.46986	-11.4839	-3.75306	-6.91977	-8.54484	-7.05338	-9.06305	-10.9277
95.6	-4.72864	0.1552	-9.72004	-8.59256	-2.17156	1.10412	0.68835	-6.6356	-12.1825	-5.80248	-7.5089	-6.86458	-4.89899	-8.63568	-10.5243
95.7	-3.09878	-0.56571	-8.38615	-8.47994	-1.8222	0.66222	0.32153	-7.74697	-12.9507	-5.93327	-8.41179	-6.14283	-1.46682	-8.4545	-10.4716
95.8	-0.51361	-0.0983	-7.71651	-7.64885	-1.33799	-0.34486	0.30252	-8.34901	-13.5427	-4.88929	-9.50295	-6.20728	0.81375	-7.57742	-11.3072
95.9	1.53398	1.05592	-7.13615	-7.17317	-0.71832	0.61521	1.20343	-9.09645	-12.7483	-5.16605	-11.0961	-6.67471	2.04125	-5.84739	-12.8936
96	1.64698	1.39818	-6.58439	-6.82579	-1.06283	1.0895	1.51647	-9.99242	-12.5799	-6.77639	-12.9212	-7.00965	2.38216	-4.88809	-15.0473
96.1	0.05935	0.53177	-6.1608	-6.22861	-1.49887	-0.06175	0.40364	-8.60065	-12.8115	-6.18083	-14.0163	-6.6942	1.74696	-4.64161	-16.0037
96.2	-2.85339	-0.31858	-5.49116	-5.37824	-2.2299	-0.35218	0.21946	-6.19772	-12.7576	-4.86477	-13.9285	-6.30152	0.82413	-5.39797	-16.7041
96.3	-4.54831	-1.10866	-6.97546	-4.81627	-4.10538	0.98607	0.92879	-3.43982	-12.3385	-3.7262	-14.1353	-5.88487	-1.11018	-5.63684	-17.5096
96.4	-5.8894	-1.10887	-9.39843	-5.93638	-6.37974	4.2758	0.05506	-1.52685	-12.0179	-3.58957	-15.0599	-5.56459	-3.79427	-6.40366	-18.2909
96.5	-7.73726	-0.23422	-10.8918	-7.82501	-8.28005	8.12444	-2.16205	-0.49589	-11.493	-4.12207	-14.7057	-5.09482	-5.71762	-7.42884	-17.6723
96.6	-8.34674	0.66693	-12.2266	-9.66701	-8.67596	10.6756	-5.21754	-1.57247	-12.1265	-4.34978	-13.1326	-5.1429	-6.17774	-9.81124	-16.1038
96.7	-8.03173	1.74944	-14.4222	-11.5047	-8.65245	13.116	-6.93516	-3.05922	-12.7283	-4.90564	-11.2299	-5.29004	-6.05221	-12.3322	-15.1105
96.8	-7.49415	1.80442	-16.5976	-11.9234	-8.96141	14.0551	-7.09044	-4.61597	-12.6982	-4.54013	-9.0873	-4.74221	-6.00923	-13.7249	-14.7799
96.9	-5.62118	1.37967	-16.8065	-12.3615	-8.49804	14.1199	-8.4821	-6.75309	-13.4383	-3.54403	-7.50367	-4.84382	-5.52446	-13.9802	-14.3361
97	-3.65805	0.85794	-15.7482	-12.8162	-6.45713	11.2408	-10.14	-8.00508	-13.0399	-2.8714	-6.42856	-4.88457	-4.76267	-13.5206	-14.4721
97.1	-1.94601	0.06588	-15.8123	-12.7825	-4.81273	9.21928	-12.5843	-9.59203	-11.9304	-2.92745	-5.60665	-4.7171	-4.20565	-12.7611	-14.7387
97.2	-0.67226	-0.64755	-14.6418	-14.0739	-4.40372	8.85259	-14.1692	-11.1638	-9.84395	-4.27505	-7.04971	-5.1179	-4.7716	-12.0937	-15.3155
97.3	0.3892	-1.81035	-12.7813	-15.6895	-4.11077	9.97564	-15.2363	-12.1731	-8.52889	-5.75343	-9.41702	-6.33889	-6.47649	-10.5632	-16.376
97.4	0.49307	-2.07879	-11.1828	-16.2624	-3.14393	9.86072	-14.9527	-12.3549	-8.04184	-6.6818	-10.988	-7.54959	-8.67248	-8.17988	-17.4646
97.5	-0.61177	-1.34589	-10.7744	-15.8716	-3.06269	9.85863	-14.5798	-12.2087	-8.31441	-8.27113	-12.8561	-9.05297	-10.0808	-6.71944	-19.2212
97.6	-2.65251	-0.84471	-11.286	-15.464	-3.39912	10.2869	-14.3901	-12.7128	-8.34395	-10.6674	-14.5505	-9.34804	-9.68006	-4.807	-20.733
97.7	-3.00177	-0.13172	-11.6644	-14.2298	-4.57473	11.9804	-12.2342	-13.4242	-9.27321	-11.8994	-15.8668	-9.70512	-9.12879	-3.65511	-21.3152
97.8	-2.83057	-0.04516	-10.1994	-12.7994	-5.22659	9.7949	-8.56934	-13.1813	-11.0228	-13.3135	-16.9005	-10.0297	-7.4462	-3.15749	-20.8436
97.9	-3.29624	-0.48837	-9.56669	-9.89626	-4.94394	5.24737	-5.0539	-11.0932	-12.9475	-13.8051	-17.4361	-10.0945	-6.33255	-3.71034	-20.4982
98	-3.7836	-1.16331	-9.4515	-5.81279	-4.24376	1.27963	-2.35022	-9.36622	-13.9161	-14.6564	-16.8157	-9.48459	-4.28804	-3.96462	-20.2492
98.1	-3.39325	-2.48096	-8.42112	-2.9175	-4.04837	0.9307	-1.11993	-7.67698	-14.002	-13.6744	-15.9245	-8.54037	-2.48989	-4.09779	-19.8452
98.2	-2.32951	-2.53915	-7.1655	-2.4815	-4.80115	2.574	-1.47307	-5.32092	-13.875	-12.3279	-14.6716	-7.86083	-2.1506	-3.82574	-18.8469
98.3	-2.3375	-1.6623	-7.33718	-2.78158	-5.36705	3.14754	-1.77242	-3.09005	-13.6555	-11.3599	-13.7959	-7.876	-3.26887	-4.95025	-17.6353
98.4	-4.08948	-1.7648	-7.1831	-4.40791	-6.60876	2.70563	-1.00057	-1.10542	-12.907	-10.5541	-12.9866	-8.1428	-5.30137	-5.88095	-17.2688
98.5	-5.97843	-1.77449	-7.25819	-7.13932	-6.98971	0.38329	-1.17105	-0.40256	-11.5205	-9.22519	-12.419	-7.76441	-7.29861	-6.46222	-18.1589
98.6	-6.56737	-2.685	-7.65195	-11.0587	-6.28408	-0.58305	-2.95159	-0.36298	-9.49407	-8.49651	-12.3575	-6.5062	-8.32038	-6.42381	-19.0048
98.7	-6.59362	-3.17639	-6.98916	-13.9398	-5.55598	-1.84608	-4.66388	-0.31923	-7.39294	-8.57008	-12.6098	-3.49845	-9.35747	-6.38978	-18.9154
98.8	-7.39257	-2.57987	-7.42694	-15.2077	-5.26921	-5.08672	-6.5957	-1.63788	-6.59776	-9.04886	-13.9421	-1.14899	-11.1074	-7.07685	-18.0856
98.9	-7.99863	-0.61147	-8.34457	-14.14	-4.67172	-9.00535	-6.44764	-2.53447	-6.89025	-9.51713	-15.6577	0.69661	-11.5102	-8.02209	-18.2388
99	-6.70547	1.10694	-10.7211	-12.8555	-3.81551	-10.8848	-5.62504	-2.2972	-7.01008	-8.9893	-16.734	1.55855	-8.83085	-8.10127	-19.5299
99.1	-5.71021	2.06991	-12.5786	-10.304	-1.97337	-11.3256	-4.09217	-1.14854	-6.61242	-8.93091	-16.8307	1.78771	-5.01917	-7.38749	-19.957
99.2	-5.04252	3.0209	-12.1711	-6.64225	0.33803	-12.06	-2.63342	-1.56226	-6.44172	-8.82231	-15.7153	1.02854	-1.63728	-6.32324	-19.6598
99.3	-4.72864	3.82869	-11.6551	-2.6932	1.72386	-8.91969	-1.46128	-3.42628	-8.2265	-7.42567	-14.8936	-0.90495	-1.28372	-5.35386	-18.8479
99.4	-4.38624	3.39538	-12.1907	-0.46017	1.79334	-3.56042	-0.3838	-5.77755	-9.1171	-6.20302	-14.5616	-4.2005	-2.7446	-5.31774	-19.355
99.5	-2.34092	1.05196	-13.166	0.34398	1.32675	1.2556	1.76659	-5.88879	-9.18368	-5.50236	-13.7754	-7.02005	-2.81515	-5.20263	-20.5989
99.6	-0.92678	-2.25244	-12.5952	-0.64273	1.29971	2.86965	2.11004	-4.99032	-8.41369	-4.98038	-11.6344	-8.16146	-1.12486	-4.70083	-20.4808
99.7	-1.74856	-5.91549	-11.2219	-2.35026	1.71121	3.94464	0.96034	-4.89762	-7.92061	-4.64756	-10.6761	-8.74527	-2.06569	-5.0551	-19.309
99.8	-2.59773	-7.1666	-9.80735	-4.39498	1.17409	5.88881	-1.82773	-4.63785	-8.41649	-4.70595	-10.2653	-8.07216	-4.64355	-7.16364	-17.1512
99.9	-3.03144	-7.93821	-10.3743	-5.83809	-0.94205	8.81812	-4.76747	-3.21088	-9.41247	-4.71179	-10.8818	-7.26621	-7.63028	-9.10687	-15.6152
100	-4.3577	-8.80462	-11.9256	-7.04962	-3.6598	7.35764	-8.3635	-1.17229	-10.2073	-4.32409	-10.8029	-6.67902	-7.89034	-10.5802	-14.8936
100.1	-6.10169	-8.83288	-13.8256	-7.97909	-5.91271	3.62078	-11.5097	1.35751	-11.6188	-4.12441	-9.98559	-5.68434	-6.89793	-10.9885	-14.4461
100.2	-7.51355	-7.84748	-15.9813	-8.41276	-6.68606	1.97226	-14.2464	3.08487	-13.0032	-3.98661	-9.61129	-4.46631	-8.14846	-10.8256	-14.4589
100.3	-7.62655	-5.27818	-18.3468	-7.74265	-7.10843	1.68915	-15.1815	3.34318	-12.957	-3.02087	-9.95385	-3.16107	-10.2929	-10.1176	-14.4045
100.4	-5.43286	-3.06157	-19.6895	-8.49442	-7.59148	1.9054	-15.1884	1.87955	-12.9736	-2.24431	-10.6102	-2.5572	-11.5487	-8.50298	-14.6594
100.5	-2.64681	-2.09838	-20.6692	-9.1923	-7.92233	0.60267	-13.898	0.5834	-13.1332	-1.76669	-11.6476	-2.11924	-10.8359	-6.77609	-15.3385
100.6	0.68139	-1.67133	-20.7817	-9.86451	-7.50142	0.46686	-11.5501	-0.20424	-12.7845	-2.56778	-12.5825	-1.50259	-9.86771	-4.98447	-16.1797
100.7	5.00485	-0.74267	-19.3923	-10.3747	-6.23076	2.41416	-8.41102	0.64465	-11.1096	-3.83247	-12.5347	0.22939	-9.69587	-2.85673	-15.9766
100.8	8.87063	-0.41064	-17.3626	-9.89607	-3.9677	5.29124	-5.80522	2.44284	-8.55197	-4.79353	-12.4031	3.30227	-7.66425	-0.63907	-14.791
100.9	12.0002	-0.82448	-14.4126	-7.63466	-1.69641	7.0014	-3.91636	5.48905	-5.163	-4.70945	-11.3639	6.6709	-4.37148	0.95112	-12.765
101	13.9029	0.14807	-10.3195	-3.19302	0.65847	7.13094	-2.15084	9.0921	-1.81697	-3.30814	-10.3367	10.3923	-1.77522	2.85405	-11.5499
101.1	15.6343	1.97879	-6.62891	5.04241	3.8393	8.29055	1.51095	14.3508	1.99752	-0.41092	-8.27396	14.9773	0.20912	5.09519	-10.8035
101.2	17.8702	4.73431	-3.39103	15.496	7.25945	10.6014	7.42426	19.3684	5.98544	4.1924	-5.32342	20.8008	2.91024	7.59774	-10.0181
101.3	20.0708	8.70915	0.92124	27.3079	10.5211	15.3568	12.5254	23.8686	10.5525	9.09116	-1.56761	26.4121	5.81676	9.79325	-7.99193
101.4	21.2213	12.658	5.84324	38.6619	13.4686	17.8871	16.9929	28.9711	14.6027	14.5119	1.68063	31.9371	8.66733	11.3648	-5.67462
101.5	22.1389	15.5854	11.3703	48.3149	15.5467	18.4126	22.5118	31.6138	18.2643	19.6898	5.85596	35.1046	10.9852	13.4727	-3.60985
101.6	22.9801	17.0661	16.6281	53.6417	16.7245	19.3267	29.3819	32.845	20.3657	23.687	10.0322	35.9011	13.2908	15.8498	-1.60345
101.7	23.2689	18.5567	21.6963	55.0471	17.2371	21.4996	36.6202	33.6437	21.5539	23.8201	14.2271	36.0138	16.2348	17.4837	2.06776
101.8	22.6445	19.9106	26.1791	53.0397	17.6924	23.845	41.3414	33.7624	22.3097	23.1814	16.4962	37.0091	19.5831	18.9048	6.83814
101.9	21.9243	20.9905	30.3121	50.3745	19.4634	24.4195	42.999	32.485	23.6719	23.1265	17.3759	36.8721	21.7824	19.5753	11.8717
102	23.7299	22.4047	33.4546	47.9941	21.7729	23.6193	44.6217	30.4591	25.9727	25.1829	18.6202	36.1383	23.7277	20.9508	16.2411
102.1	28.9928	26.1093	35.1715	46.2964	24.9053	26.7283	46.4555	30.069	29.2788	27.9715	21.9543	36.9864	25.9028	23.3004	19.7114
102.2	34.8959	31.1616	34.9183	47.6187	29.4293	33.8186	50.1249	32.4094	32.3206	30.4846	24.5925	40.8535	27.0877	26.3686	22.2909
102.3	40.6426	35.9141	33.8273	52.0082	33.7542	40.4879	51.7275	34.8707	35.0086	32.7115	25.5008	45.2864	27.2379	30.4009	23.6192
102.4	46.7157	40.2178	32.4232	57.0326	37.6589	44.8443	51.6865	36.1141	36.9104	35.8504	25.6097	48.4096	27.1151	33.948	22.7976
102.5	52.7661	42.9418	32.5851	62.8607	41.0093	47.9982	51.2164	36.1031	38.7015	40.1349	26.8303	49.5468	26.6171	37.2155	20.7004
102.6	55.527	44.997	33.4551	66.8331	42.7526	49.1265	50.7675	36.3383	39.9394	41.8025	27.3673	50.6737	24.331	41.19	17.3538
102.7	54.671	44.7451	34.0604	69.8393	43.0774	46.7341	50.1817	36.0989	38.0006	40.2085	26.32	51.5478	23.1531	44.7155	13.4778
102.8	50.7173	42.388	34.1421	71.7486	42.7498	43.413	49.6503	34.3357	33.928	37.8928	22.9868	51.2802	22.7459	46.6087	9.488
102.9	46.6358	39.4427	34.6146	72.522	42.1169	40.7188	47.5759	31.2262	29.3047	35.5538	19.8954	48.3438	21.8696	46.8645	6.25329
103	42.5532	36.9085	33.8943	73.6087	41.2978	37.2651	45.4677	27.5273	26.1393	32.9123	16.3817	44.0496	22.2697	45.2031	3.95435
103.1	37.3441	33.4935	31.3725	73.7372	39.8708	33.8322	44.5402	23.163	23.607	29.228	13.1292	40.1723	21.5918	41.7086	1.80778
103.2	32.3347	30.9527	26.0448	72.7859	37.4488	30.8799	42.9564	20.2902	21.1544	25.5694	10.6671	36.4497	20.3706	37.6178	-0.41068
103.3	30.2391	27.9706	20.7882	70.1493	35.0496	31.7553	39.6793	18.562	17.9131	23.3659	10.5275	31.6297	19.8641	33.6294	-1.94885
103.4	28.7428	26.6449	16.7088	66.4185	32.4209	34.9626	36.7105	16.2892	16.4211	21.9587	10.744	27.8302	18.2085	30.5947	-3.60003
103.5	27.0719	26.1034	13.0331	61.9347	29.5039	36.6758	32.651	13.8713	15.7469	19.9922	11.1262	24.4291	16.4429	27.6619	-4.03589
103.6	23.9126	24.9012	9.08576	56.7801	27.1788	35.0942	28.6057	12.131	15.1449	18.7065	10.4395	21.9856	13.5531	23.2785	-4.57747
103.7	20.0685	24.668	7.9507	49.8675	25.2093	33.4216	24.2867	11.5602	13.2229	18.9552	9.68341	20.9872	11.7986	19.5654	-5.61876
103.8	17.0587	24.2453	9.97942	42.3666	23.7868	31.2131	20.3907	12.9745	11.7354	18.501	8.72151	19.9804	10.9589	17.5588	-6.82301
103.9	14.3742	22.247	12.8534	36.3494	22.7541	28.0551	17.355	14.1117	10.0475	17.3612	6.62264	19.2955	10.3027	17.0645	-7.2979
104	10.9331	20.8272	14.8701	31.8342	22.3347	23.378	15.712	14.8541	8.18444	15.884	3.32742	18.3586	9.66348	16.3524	-6.96782
104.1	8.90373	20.2577	14.8689	29.0606	21.3026	18.1294	14.9974	16.0488	5.81958	14.812	-0.81946	16.5387	9.1607	14.7268	-6.85491
104.2	8.13788	19.5328	14.28	27.163	19.2136	16.4067	14.543	17.7391	3.65377	13.8042	-4.85787	15.4671	8.60165	12.9473	-7.41804
104.3	8.55904	18.804	13.5866	24.8702	17.3431	16.9291	15.6178	17.7102	1.43533	12.431	-9.27896	13.6726	6.33868	11.2481	-8.82061
104.4	9.49267	16.6627	12.6533	22.7981	15.6402	17.5173	17.2657	17.2023	0.42055	10.5497	-12.5341	11.991	4.43227	9.85694	-9.55667
104.5	9.5543	15.269	10.9279	22.4904	13.8843	19.4343	16.9123	15.8564	-0.49103	8.30058	-14.6052	10.5258	3.83194	7.99983	-10.1535
104.6	8.84209	14.3705	8.90649	22.6914	11.4852	20.6931	15.0362	15.9455	-1.50434	6.10052	-15.1968	10.0945	4.07059	5.40232	-11.4986
104.7	8.37185	12.5793	7.59926	21.9729	8.76823	22.1985	13.2212	15.2814	-2.10455	5.3695	-15.751	9.82429	4.9232	2.38343	-13.142
104.8	7.30354	8.72074	6.03229	20.4579	7.28176	23.2213	11.3795	12.4839	-3.46795	4.53922	-15.9225	9.34226	5.39662	-0.18566	-14.4256
104.9	5.57211	4.62219	4.18211	18.0216	7.49332	22.4534	9.60583	9.50227	-6.24661	3.78718	-14.2006	7.91055	5.04638	-1.45713	-14.5421
105	3.7642	0.65055	2.52685	14.4225	7.90306	19.9775	7.77645	7.12975	-7.96039	3.49874	-12.0176	7.48319	5.76551	-1.50133	-14.6859
105.1	2.24048	-2.95651	0.83295	11.5399	7.04862	17.5779	6.17211	5.56988	-8.92311	3.1671	-9.47382	7.32144	7.1372	-1.59734	-14.9811
105.2	2.62626	-5.27396	-0.10277	9.59937	6.43628	16.1518	6.32283	4.37935	-8.81002	4.52871	-7.92076	6.98978	7.80743	-1.42101	-15.3628
105.3	3.92513	-7.62969	-2.23274	8.22013	7.05111	15.6849	6.53533	4.1877	-9.12398	5.41504	-5.69015	6.17857	7.1466	-1.62062	-15.2659
105.4	4.98088	-8.92941	-4.11374	6.41717	7.65373	13.5109	6.38651	4.9718	-9.38153	5.13478	-4.11432	5.54399	5.50593	-0.59544	-15.6679
105.5	5.03795	-9.47963	-5.45717	4.31796	7.82062	10.0404	5.19271	6.9981	-7.64088	4.3045	-3.7759	6.35451	4.50647	-0.4617	-16.192
105.6	4.72864	-8.50632	-4.46323	2.46135	6.37514	7.04214	3.73909	8.43694	-4.59913	3.47072	-4.35584	6.24666	4.47517	-1.41796	-17.7215
105.7	4.71723	-6.52155	-4.00539	2.64331	4.34803	4.55996	1.47294	9.30062	-0.88988	2.5622	-5.61332	5.68354	3.33954	-2.73383	-18.5797
105.8	4.2196	-3.8196	-4.33532	3.65019	3.78447	4.07104	-1.55042	8.11197	0.99593	0.76618	-6.17707	4.07169	0.6205	-3.3515	-18.2018
105.9	2.88421	-2.22998	-4.74913	3.85591	4.3849	3.71376	-4.15869	6.55792	1.11232	-1.80289	-6.16774	2.63915	-1.69437	-3.53876	-17.045
106	0.27621	-0.79542	-4.53685	2.51846	5.34689	4.00627	-4.65875	4.60058	1.50563	-2.81067	-5.74421	2.88625	-1.93643	-3.52964	-16.0767
106.1	-1.60361	0.87306	-4.93892	0.97552	5.44093	7.09438	-4.07259	3.01154	1.58617	-2.14738	-5.57599	3.17981	-1.87585	-3.05958	-14.9978
106.2	-1.6835	1.07068	-5.69244	0.08615	5.44313	11.877	-4.43447	1.00108	1.75912	-1.13143	-3.70787	4.00334	-2.61696	-3.30454	-13.6496
106.3	-1.9871	-0.04955	-6.90503	0.17333	5.85082	16.038	-4.37954	-0.86148	-0.64769	-1.75735	-2.16283	3.78327	-3.91039	-3.83306	-12.1635
106.4	-2.40712	-1.78028	-6.51885	-0.28219	6.30198	16.5384	-3.96273	-1.88244	-4.54013	-3.03488	-1.70625	2.83448	-4.21003	-4.43543	-11.7773
106.5	-2.93671	-3.01502	-6.22977	-0.93791	6.46873	14.495	-4.35046	-3.22379	-7.32748	-3.57673	-1.7792	1.8006	-2.78312	-4.05197	-10.6851
106.6	-4.23558	-2.53695	-7.45727	-2.59244	5.06864	11.9887	-4.9218	-5.45361	-8.12821	-3.26493	-2.51707	2.15795	-1.16646	-3.40635	-8.8988
106.7	-5.45797	-0.9911	-8.87798	-2.36216	3.45745	8.45979	-6.33303	-7.2968	-8.30417	-3.04072	-3.9659	2.71223	0.15625	-2.60179	-7.74004
106.8	-6.17132	-0.8257	-9.2309	-1.06925	2.00139	6.18236	-7.02221	-7.3445	-8.01287	-3.57906	-6.37238	0.91985	1.42138	-3.1266	-7.78158
106.9	-7.29784	0.32302	-7.64437	0.31335	1.58077	2.53744	-6.85875	-6.90496	-8.057	-4.37197	-7.94704	-1.72224	3.53514	-4.17117	-8.97086
107	-7.18827	1.7678	-5.99596	1.60902	1.96568	-0.62171	-6.58658	-6.66956	-7.41097	-3.64212	-8.28771	-3.86686	4.43008	-4.90881	-9.3835
107.1	-6.21583	2.98878	-4.87166	3.07585	1.94042	-0.11817	-5.88448	-6.29792	-4.96038	-2.36459	-7.29204	-4.06557	5.4169	-5.51584	-9.36789
107.2	-5.09388	2.6538	-4.00246	4.5707	1.52113	1.16367	-5.1419	-4.32975	-2.80109	0.80705	-6.65557	-3.96853	6.04747	-5.76032	-10.4674
107.3	-4.07921	0.42279	-3.32353	6.15566	0.98093	1.78735	-5.87992	-0.69941	-0.5668	3.81871	-7.81107	-4.94117	4.9738	-6.06336	-12.5739
107.4	-3.83496	-1.302	-1.93755	4.70643	-0.08581	1.09054	-6.57499	0.89275	0.52761	4.8335	-9.36814	-6.6785	1.57797	-7.34168	-13.8559
107.5	-3.87491	-2.11375	-1.21215	2.16211	-1.15196	-0.02728	-6.28799	-0.72795	1.92413	4.07562	-9.29921	-6.53786	-1.19565	-7.59082	-14.49
107.6	-4.2527	-4.08017	-1.24932	-0.48525	-1.3691	-0.31666	-5.44125	-2.30449	2.05554	3.18812	-8.56039	-5.22325	-2.09756	-6.48959	-15.0088
107.7	-5.15209	-6.49991	-1.20163	-1.28959	-1.4859	-1.38851	-4.1777	-3.20546	2.02271	1.82534	-7.58136	-3.05498	-1.91648	-5.31822	-14.8984
107.8	-6.83102	-8.25253	-1.76879	-2.4625	-0.53405	-2.3047	-2.68854	-3.7525	1.86309	1.37108	-8.46359	-1.51033	-1.63217	-4.96736	-14.7248
107.9	-7.10038	-8.92495	-2.13198	-5.06536	-0.1052	-3.01509	-2.3736	-3.51627	0.43563	0.19982	-9.13843	-1.36032	-1.35483	-4.62288	-15.1776
108	-5.87799	-8.48933	-3.39201	-7.59039	0.05288	-3.60325	-0.41384	-3.94644	-2.26416	-1.5203	-9.21021	-2.42959	-2.27637	-4.65729	-15.2848
108.1	-5.13611	-7.72971	-3.44215	-8.12776	-0.19056	-3.30552	2.30277	-4.07497	-5.301	-1.94419	-8.93978	-4.00205	-2.85902	-5.54854	-14.201
108.2	-4.82109	-7.31487	-4.4197	-6.61829	-0.7143	-4.4505	3.09496	-2.95215	-7.50379	-1.89281	-9.29037	-5.32705	-2.91368	-7.21962	-12.3372
108.3	-4.66587	-7.89555	-6.67073	-6.90096	-2.13217	-6.33199	2.26323	-2.61572	-7.60096	-2.32255	-11.2401	-6.00712	-3.49901	-9.00535	-11.0042
108.4	-4.78913	-8.2566	-9.34585	-8.09316	-3.57001	-10.4606	-1.08762	-3.03985	-6.70482	-3.64796	-12.8865	-6.5155	-2.85513	-9.39736	-11.2253
108.5	-4.99572	-8.72257	-11.695	-9.22111	-4.96847	-10.7072	-4.10414	-4.83096	-5.73276	-5.28399	-13.868	-7.08346	-1.17984	-8.74803	-11.8709
108.6	-6.47264	-7.7597	-12.9741	-10.1381	-6.08883	-8.07558	-6.73863	-5.90149	-4.30755	-6.62809	-13.0451	-6.92051	-0.51033	-8.7853	-12.7879
108.7	-7.61856	-7.65698	-12.3487	-11.2323	-5.13846	-5.75218	-7.07315	-6.06232	-3.08545	-6.82077	-10.6408	-5.79235	-0.32593	-8.78216	-13.9936
108.8	-7.42339	-7.40294	-10.6186	-13.3088	-3.52903	-5.57668	-7.02658	-5.24655	-1.67826	-7.07534	-8.18104	-4.60556	-0.63092	-8.13511	-14.9624
108.9	-5.58808	-6.42337	-8.60186	-15.3164	-2.30495	-5.12746	-7.97596	-3.84145	-1.94318	-7.7795	-6.55715	-3.55251	-2.34449	-6.28075	-16.3218
109	-3.93654	-5.15774	-8.19441	-15.1097	-1.06368	-3.72966	-8.56991	-1.90015	-4.15081	-7.84139	-7.31508	-3.30421	-4.88902	-5.07981	-17.0036
109.1	-2.79176	-3.28174	-8.24723	-13.1872	-0.85683	-0.96437	-8.8839	0.14906	-6.88422	-7.65922	-8.22883	-3.29969	-8.83385	-4.72849	-17.288
109.2	-1.59676	-3.08213	-8.19074	-12.4838	-1.00007	-1.88996	-7.70987	3.25006	-9.08932	-7.35794	-9.21458	-3.85345	-12.531	-5.0436	-17.6404
109.3	-0.66655	-2.84633	-7.93051	-12.5052	-1.39792	-5.66756	-5.82005	4.75786	-10.5262	-6.80909	-11.4412	-5.04664	-15.2121	-6.37172	-17.7002
109.4	-0.02968	-1.70806	-8.52433	-12.45	-2.42851	-7.65456	-4.30561	4.37935	-11.2421	-7.15358	-14.6258	-5.15246	-15.4142	-7.85355	-18.2447
109.5	-0.43828	-1.08173	-10.4907	-11.6236	-3.22684	-6.72061	-4.02526	2.67323	-11.4227	-7.66506	-16.0889	-4.48695	-13.5491	-9.78386	-19.4724
109.6	-0.541	-0.86232	-12.345	-11.0536	-4.36645	-7.0476	-4.05149	2.02683	-11.2197	-7.16643	-15.1427	-4.23138	-10.2795	-11.0088	-19.9532
109.7	0.00342	-2.35362	-11.6316	-11.1422	-5.42951	-7.36519	-1.29384	0.52986	-10.7527	-4.65107	-13.2249	-4.63373	-8.59325	-11.6919	-18.9147
109.8	-0.56041	-3.65542	-9.78925	-11.2425	-6.35271	-10.353	0.6644	-2.19013	-11.0248	-2.03645	-10.8576	-6.24741	-7.9364	-11.6755	-18.2301
109.9	-2.10352	-3.96193	-7.38121	-11.8602	-5.69689	-12.9888	1.55676	-6.15814	-12.1744	-1.09406	-7.82689	-7.09468	-6.2045	-11.2076	-18.1538
110	-4.56771	-3.14204	-6.0911	-11.9295	-5.05076	-12.7997	1.27603	-9.33622	-13.2879	-1.80056	-5.08397	-7.59278	-6.6982	-9.95876	-18.1505
110.1	-6.31399	-3.84513	-6.87812	-11.849	-5.29522	-12.5573	0.15712	-10.2026	-13.4421	-2.73944	-2.46463	-7.4946	-7.72856	-8.45944	-18.0218
110.2	-7.65736	-5.28761	-7.56243	-10.7507	-5.66896	-13.7806	-0.02648	-10.2828	-12.2534	-1.59854	-2.7576	-7.03294	-9.57358	-7.14149	-18.2212
110.3	-8.3924	-4.76565	-8.32012	-9.68064	-4.47	-13.0337	1.79529	-10.9984	-11.3232	-0.33969	-4.43118	-6.91318	-10.854	-6.98759	-19.364
110.4	-9.2838	-2.72666	-9.92988	-9.3757	-3.22711	-11.0811	3.15179	-11.3984	-11.5533	-1.46191	-6.34191	-7.40639	-11.1559	-6.50851	-21.2672
110.5	-8.84095	0.03776	-11.4773	-9.97563	-3.00453	-6.81254	3.27362	-9.69244	-11.1752	-5.02709	-8.59578	-5.43132	-9.7592	-6.44568	-22.1589
110.6	-7.20539	1.39192	-13.733	-9.36977	-3.14131	-2.08845	1.69779	-7.30701	-9.76327	-7.58098	-11.3198	-2.32569	-7.99333	-6.73132	-20.8839
110.7	-4.87245	1.28743	-13.3483	-7.39653	-2.80943	-0.2007	-0.46401	-4.54452	-8.63441	-7.29254	-14.4494	-0.14723	-3.83538	-7.95203	-18.8809
110.8	-3.8692	-0.07465	-11.8559	-5.96575	-1.2786	-0.3762	-1.65819	-2.02514	-8.19437	-6.55101	-17.1055	1.02745	0.35452	-8.24918	-17.4881
110.9	-4.01529	-0.56625	-11.2224	-5.09693	-0.19614	-1.85026	-2.25956	0.18614	-8.92304	-7.19328	-18.4996	1.41499	2.12802	-7.61173	-15.6466
111	-5.88141	-0.59221	-11.2002	-4.33965	0.50464	-4.04516	-3.14051	2.30097	-9.56879	-10.0998	-18.7615	2.32121	3.40644	-6.18922	-14.2942
111.1	-7.60144	-1.13199	-11.9412	-3.32492	1.27432	-5.17865	-5.26202	3.6217	-9.81238	-11.82	-17.6195	4.05796	4.72582	-4.6378	-13.389
111.2	-8.94025	-0.90005	-14.2544	-2.71608	2.57406	-5.81069	-7.08265	5.40156	-9.19435	-11.152	-16.4696	5.68531	4.71317	-4.6551	-13.0152
111.3	-10.3453	-0.11029	-17.6921	-2.53263	2.63943	-7.50935	-8.14683	5.61154	-8.44505	-9.89549	-14.6392	5.22521	3.21198	-4.72982	-13.2067
111.4	-12.1269	2.05166	-20.7482	-2.60855	1.12887	-9.2122	-6.20227	3.30256	-8.13873	-8.53154	-12.1415	4.05032	0.44899	-4.61489	-13.8468
111.5	-12.2582	4.3105	-21.9214	-2.10004	-1.39142	-10.6894	-5.33538	-0.73295	-7.90777	-7.76549	-9.5727	1.0538	-3.01383	-3.85444	-16.2671
111.6	-11.5928	6.49906	-21.9831	-2.77696	-3.87647	-10.2642	-7.01252	-3.67251	-7.83628	-7.10921	-8.3681	-1.3729	-5.98693	-4.8128	-18.7546
111.7	-11.6749	6.88805	-20.5049	-4.06908	-5.92195	-9.60605	-8.62826	-4.79325	-7.91506	-6.37819	-7.29393	-2.58365	-9.4877	-6.84501	-19.673
111.8	-11.8279	7.07545	-18.7117	-4.04854	-8.44225	-11.8281	-8.6486	-5.14531	-7.76387	-5.15204	-7.54867	-3.25374	-12.1122	-8.16458	-19.3429
111.9	-12.8072	8.32678	-17.0229	-4.49877	-10.4893	-13.9258	-8.32245	-6.75851	-8.25036	-5.00723	-8.85809	-4.24629	-13.9167	-9.25677	-18.8442
112	-14.3994	7.2612	-16.0662	-4.45937	-12.2373	-12.947	-8.09038	-7.76051	-10.1315	-5.1859	-10.7864	-4.55998	-15.1498	-9.60639	-19.9114
112.1	-14.2498	4.52109	-15.8179	-4.34255	-12.2444	-10.3279	-9.87034	-6.85475	-11.5662	-6.17383	-12.353	-3.44044	-16.6514	-9.97825	-20.8252
112.2	-13.1153	1.15191	-15.7123	-4.93696	-11.5784	-7.92723	-10.3887	-3.64876	-13.2636	-7.01111	-12.7267	-0.93687	-15.2161	-10.2033	-20.2863
112.3	-11.5871	-0.80075	-16.2965	-6.36159	-11.0602	-4.19664	-9.05838	-0.42964	-13.9478	-8.37389	-12.6909	1.15375	-11.2735	-10.8317	-19.5899
112.4	-10.3053	-1.54222	-16.8334	-8.07864	-10.0046	-0.76587	-6.86845	0.56424	-13.8538	-9.24271	-12.7947	2.06459	-7.7005	-10.6545	-20.0336
112.5	-8.57273	-3.25887	-16.7199	-9.0223	-8.39873	3.4202	-5.68149	0.16989	-13.9622	-8.26763	-12.9076	1.32252	-6.80224	-10.4131	-22.335
112.6	-6.25692	-5.47537	-15.2701	-9.01231	-7.16584	6.02253	-5.11472	-0.02509	-12.9991	-7.20379	-12.6547	0.20756	-6.73834	-9.92768	-24.1917
112.7	-3.92855	-6.67248	-13.2069	-8.6838	-5.96247	9.00407	-5.01246	1.19398	-11.9068	-7.32057	-12.1642	-0.14344	-6.20167	-8.33635	-24.5865
112.8	-3.1627	-6.67666	-11.8334	-9.01819	-5.34529	8.83379	-4.54205	3.56671	-10.6471	-8.46381	-14.0381	-0.68504	-4.1385	-7.81601	-24.3001
112.9	-4.15682	-5.87678	-11.8466	-9.22494	-4.50377	8.88602	-2.95254	2.81968	-8.76231	-10.094	-16.0093	-2.82701	-2.84572	-6.4913	-24.1253
113	-5.80152	-4.83122	-11.8742	-10.2946	-3.0345	6.81336	-1.69126	1.20752	-7.32397	-10.8367	-18.5371	-4.67453	-3.83716	-5.3724	-23.9194
113.1	-6.51943	-2.97368	-11.465	-10.1251	-3.01085	4.68846	-1.22845	0.11177	-6.69773	-10.985	-19.3748	-5.88383	-4.25966	-3.92469	-22.6764
113.2	-6.16447	-1.27727	-12.0376	-9.98857	-3.06109	2.89577	-1.639	-0.74753	-5.36253	-11.5257	-19.9603	-5.93341	-3.80821	-2.8093	-21.4781
113.3	-4.58483	-0.69911	-12.0146	-10.351	-2.7683	2.05166	-2.26697	-2.42115	-4.62193	-11.9087	-20.2576	-5.1272	-3.10173	-2.06444	-19.8844
113.4	-2.53724	-1.69045	-11.5673	-11.1	-1.36528	1.32455	-2.65603	-5.46465	-5.07986	-10.9698	-19.6628	-5.39098	-3.74261	-1.76768	-18.6259
113.5	-1.61045	-2.22231	-11.2816	-11.4893	-0.69565	-0.85781	-2.4922	-8.44712	-5.22502	-10.1582	-18.4625	-6.32605	-6.31982	-1.94496	-17.873
113.6	-1.01581	-3.97118	-11.2381	-9.92455	-1.43801	-2.0989	-4.71653	-10.3478	-5.7743	-10.4864	-16.9054	-5.92915	-10.7102	-2.2286	-16.8643
113.7	0.24653	-5.23054	-10.5411	-6.89526	-3.13296	-3.07569	-7.31548	-11.4746	-6.50585	-9.43072	-15.5022	-5.24872	-14.4723	-3.52488	-17.4229
113.8	0.91993	-6.30646	-10.172	-4.30431	-4.43197	-0.5444	-10.5012	-12.5962	-7.15566	-7.84256	-14.0487	-4.97673	-16.2102	-5.59654	-18.5189
113.9	-0.28876	-7.69461	-8.32158	-4.21102	-5.22868	0.75311	-12.1851	-13.0642	-7.87914	-6.42139	-13.4158	-5.41676	-16.7123	-7.17286	-19.1587
114	-1.96313	-7.88158	-5.60953	-5.61127	-5.6678	0.71863	-13.5831	-11.8583	-9.1794	-5.98231	-13.4063	-5.91366	-16.9776	-7.44386	-20.0638
114.1	-3.49712	-8.0526	-3.99928	-5.6609	-6.12367	-1.79281	-14.6811	-9.76077	-9.47316	-5.38909	-14.1659	-5.80368	-16.8135	-7.57361	-21.2305
114.2	-4.21161	-7.79074	-4.18026	-5.91537	-4.74122	-4.93523	-15.4862	-7.84405	-10.9623	-5.17656	-14.9774	-5.73502	-15.6375	-6.88322	-21.7582
114.3	-5.25253	-7.44034	-4.9152	-7.28336	-2.83501	-7.13849	-15.7114	-6.16252	-12.4342	-4.59501	-14.8455	-5.43932	-13.6016	-6.16222	-22.7414
114.4	-6.0412	-7.92799	-5.02966	-8.85324	-1.27876	-8.36913	-15.1998	-4.60202	-14.2039	-4.79237	-15.6037	-4.36475	-10.4451	-4.67972	-22.4232
114.5	-5.75929	-9.19527	-4.56081	-9.82977	-0.16296	-9.89438	-13.1938	-3.85437	-15.1578	-6.15047	-16.3731	-3.52511	-8.81139	-2.50341	-21.5852
114.6	-4.11345	-10.7608	-5.5254	-10.3707	1.21067	-10.6883	-10.5665	-3.52023	-17.5288	-7.64871	-15.7348	-2.78247	-8.65926	-1.32975	-20.3982
114.7	-2.62512	-12.006	-7.503	-10.4768	2.47824	-11.0717	-8.54672	-2.82903	-19.5555	-7.91029	-15.1125	-3.20982	-8.33035	-1.55142	-19.7816
114.8	-2.826	-12.7735	-8.54952	-11.1314	2.14151	-10.3864	-7.46791	-3.01152	-20.4292	-7.75498	-15.3279	-4.60447	-8.62334	-2.02585	-19.503
114.9	-2.81002	-12.2172	-7.67665	-11.1512	0.3812	-8.27511	-6.47045	-4.23184	-21.0868	-6.66896	-14.2694	-5.31837	-9.55023	-3.51395	-19.7876
115	-1.93346	-11.8079	-5.38795	-11.1913	-1.34562	-5.91307	-6.29996	-6.13773	-20.0116	-5.09598	-12.2202	-5.99911	-9.92147	-5.10339	-19.7681
115.1	-0.63916	-11.7798	-5.39651	-10.6828	-1.7367	-5.23924	-6.01373	-7.00245	-18.1105	-4.41751	-12.1071	-5.77327	-10.5294	-7.44244	-20.374
115.2	-0.86401	-12.197	-6.84168	-8.92626	-1.48194	-6.99432	-7.00358	-6.08523	-15.5548	-5.51638	-12.1014	-5.91938	-8.79923	-10.4129	-21.616
115.3	-3.41037	-12.838	-8.08484	-6.8122	-1.80838	-9.43263	-8.11585	-4.4914	-12.8924	-6.78924	-12.5472	-5.21884	-7.11396	-12.1044	-22.6844
115.4	-6.08686	-11.6655	-8.96725	-5.23401	-2.87306	-11.9326	-8.68281	-3.06151	-10.4278	-8.27463	-11.7077	-3.64123	-6.20872	-11.913	-23.2683
115.5	-7.34577	-8.67749	-10.0641	-3.57565	-3.5615	-11.2399	-9.30508	-2.02389	-8.69573	-10.3521	-11.6076	-2.07184	-5.52422	-11.6175	-22.7126
115.6	-7.8046	-6.12082	-10.6702	-1.66643	-4.04426	-10.1002	-9.05439	-1.68287	-7.50049	-12.2882	-12.5811	-1.52873	-5.78858	-11.6695	-21.0637
115.7	-8.14016	-3.84823	-11.5269	-0.13404	-4.66012	-8.40988	-9.65613	-1.72162	-8.25548	-12.6362	-13.5332	-3.33904	-5.49397	-11.5788	-18.3377
115.8	-8.31479	-3.25401	-11.7818	-0.50915	-4.133	-5.69055	-10.3044	-3.6023	-9.79498	-12.6047	-13.5997	-5.86143	-4.4589	-9.87036	-16.3285
115.9	-8.40039	-2.32118	-10.8284	-1.06771	-3.28017	-2.45827	-10.1744	-5.91754	-10.6656	-10.5564	-10.8791	-6.78563	-3.85127	-8.48682	-15.3089
116	-7.43594	-1.70673	-10.2513	-2.19141	-2.29292	0.0166	-9.72342	-7.55824	-10.5757	-8.10064	-8.99871	-7.1634	-3.484	-8.29823	-15.5353
116.1	-5.6189	-1.77942	-9.95727	-2.9633	-2.2675	1.71631	-8.00333	-8.64357	-11.3886	-6.15047	-8.19402	-7.72381	-3.37477	-9.39907	-15.9218
116.2	-4.0404	-2.50901	-10.0223	-3.98181	-3.42547	2.99501	-5.11662	-9.04645	-11.8894	-4.77952	-6.81589	-8.44713	-3.00353	-9.16695	-16.5688
116.3	-3.20379	-4.36489	-9.90665	-5.51056	-4.00356	3.00755	-2.76893	-8.41025	-11.3383	-4.38131	-5.11693	-7.97886	-1.39579	-7.72238	-17.3495
116.4	-3.19009	-4.60673	-9.43756	-7.31837	-3.10195	2.63982	-1.32197	-6.20168	-9.70181	-4.84725	-2.76793	-7.31579	0.23093	-6.53208	-18.7895
116.5	-4.45129	-3.26687	-8.84692	-9.46824	-2.58848	2.27835	-1.22655	-3.48169	-8.87049	-5.83868	-3.60165	-6.88303	1.09425	-6.02258	-19.777
116.6	-5.2959	-2.14641	-8.55319	-11.8404	-3.74835	1.24202	-0.98099	-1.15208	-9.16825	-6.63276	-5.99114	-7.36985	-0.43622	-5.33913	-20.3226
116.7	-4.75603	-1.31795	-8.56518	-12.6946	-6.13715	0.23285	-1.39115	0.52528	-9.80214	-6.58722	-6.42942	-7.69133	-2.51503	-3.95996	-19.5304
116.8	-5.05507	-2.30721	-7.58836	-13.155	-7.14439	-0.49112	-1.37214	2.10391	-8.16434	-5.70672	-4.09457	-7.77875	-3.73555	-2.51881	-18.5969
116.9	-4.16139	-4.57001	-6.40757	-13.7838	-6.71437	-0.37516	-3.18841	2.77864	-5.94977	-4.57166	-2.50751	-8.0257	-3.42862	-2.59067	-19.0749
117	-2.94014	-7.61266	-5.476	-13.2873	-5.80998	-1.72386	-4.62188	2.79468	-5.46567	-3.34434	-2.51612	-7.94082	-3.34574	-3.70673	-19.5986
117.1	-1.15848	-9.64561	-5.38086	-12.135	-6.08369	-3.78503	-6.33532	2.92884	-6.53082	-3.39572	-2.68668	-7.0148	-3.38872	-5.30396	-20.9672
117.2	0.54329	-11.2312	-5.89128	-11.0007	-7.22683	-4.29588	-6.68998	2.55783	-7.15033	-4.85776	-2.05138	-5.88154	-3.96805	-6.45233	-22.0792
117.3	1.17788	-12.2387	-7.2237	-10.6453	-7.30411	-4.72107	-6.67591	1.15586	-8.16181	-6.61057	-1.87703	-4.88811	-4.15318	-7.56411	-23.0665
117.4	0.37094	-12.0797	-8.57985	-11.6821	-6.37004	-5.15984	-6.86731	-1.36811	-10.6072	-8.42527	-2.3191	-4.35784	-3.59956	-8.28226	-24.1003
117.5	-0.53187	-11.5983	-9.6315	-12.4847	-5.07265	-4.89449	-5.5167	-4.60452	-13.6522	-11.6915	-3.71576	-4.08927	-2.64242	-7.30118	-25.0711
117.6	-2.60229	-10.7962	-11.1028	-13.548	-5.21104	-2.91271	-4.12467	-6.15856	-17.1209	-15.4645	-5.71432	-3.96962	-2.99899	-6.49149	-25.3381
117.7	-4.9923	-9.6675	-13.3277	-14.1456	-4.96452	-1.8931	-2.82709	-6.51686	-18.8287	-18.4318	-7.68289	-4.49298	-5.08542	-6.07743	-24.5701
117.8	-7.50556	-8.66165	-14.4762	-14.9514	-4.59415	-2.01115	-1.74695	-5.7863	-19.4972	-18.4657	-9.27337	-5.14757	-7.75881	-5.91754	-23.235
117.9	-8.40267	-7.87355	-14.4779	-16.5063	-3.74102	-3.6346	-0.71547	-6.38666	-19.9191	-16.4548	-8.9392	-6.60995	-9.44505	-5.4166	-21.7795
118	-7.91189	-7.29111	-13.4052	-16.4028	-3.81315	-5.58503	0.69025	-6.25147	-19.9554	-13.5891	-8.05106	-8.07934	-9.5752	-4.91061	-20.4826
118.1	-6.51258	-6.26765	-13.2128	-13.9841	-4.69154	-6.79374	-0.30569	-4.09393	-19.4092	-11.0668	-8.57563	-8.59297	-9.5945	-5.28228	-19.7905
118.2	-5.62803	-4.31344	-12.8542	-9.63979	-5.37336	-6.73942	-2.54257	-2.10763	-17.6903	-8.96828	-9.02171	-6.89998	-10.8566	-6.83959	-19.2714
118.3	-4.6556	-1.6844	-11.9603	-6.17894	-5.20044	-5.70413	-4.85471	-0.44547	-15.9757	-7.83555	-8.58803	-4.40129	-11.9027	-8.09329	-18.7317
118.4	-4.80625	-0.7399	-10.8101	-4.75749	-4.6529	-2.39246	-5.9607	-0.25028	-14.4016	-7.23883	-8.32067	-1.85696	-11.0202	-8.70602	-18.1591
118.5	-4.96719	-0.08135	-9.70781	-3.66114	-3.87529	1.73094	-8.11908	-0.96877	-12.6143	-8.91924	-8.87157	0.62171	-9.99648	-8.98643	-17.402
118.6	-4.9124	0.66607	-9.03377	-1.30579	-3.26252	6.805	-9.08214	-1.07105	-11.7491	-11.6506	-9.90656	2.0069	-9.56336	-9.67597	-17.3037
118.7	-4.72522	2.54207	-7.83024	-0.69251	-2.58526	11.8926	-9.72361	-1.90577	-12.0908	-13.7024	-10.9415	1.79967	-10.5036	-9.49052	-16.2756
118.8	-4.2858	2.73574	-7.81777	-2.3101	-1.69027	14.706	-9.28	-2.47906	-13.213	-16.2271	-10.0562	0.61028	-8.94244	-7.93084	-14.2333
118.9	-4.21389	0.92879	-8.20272	-5.77964	-0.28225	15.6692	-8.15424	-3.59876	-13.477	-16.5202	-8.74492	-2.09616	-5.86448	-6.15642	-12.7676
119	-4.44787	-1.16432	-8.89975	-8.16301	0.32994	13.8995	-6.02551	-4.39953	-13.3759	-15.6502	-7.34177	-5.14851	-3.82824	-5.20738	-11.4644
119.1	-3.90801	-1.75061	-8.73002	-7.53488	0.38342	11.0141	-2.92156	-4.3837	-12.0235	-12.3746	-6.80539	-7.59922	-3.10108	-4.99265	-10.8196
119.2	-3.47201	-2.50638	-9.11644	-5.44944	0.08858	6.39861	-0.97738	-2.70571	-12.1032	-8.25478	-5.52063	-9.08416	-1.70142	-3.57175	-11.0799
119.3	-3.37613	-4.29792	-11.1618	-2.99417	-0.91072	0.79803	-0.45964	-1.51601	-12.9527	-5.52105	-4.39664	-9.25708	-0.62573	-2.29381	-10.6628
119.4	-3.98562	-4.35038	-13.8428	-1.00543	-1.76913	-4.52885	0.31145	-1.2402	-12.8496	-5.13218	-3.81824	-8.09529	-0.72661	-2.04049	-10.5648
119.5	-5.09159	-2.56907	-14.7472	1.06516	-0.86238	-7.20639	0.1824	-1.17979	-10.5214	-5.23261	-5.01175	-5.92094	-2.27005	-2.29837	-10.7796
119.6	-5.77869	-1.12428	-13.5904	1.85363	1.46458	-8.66583	-1.17524	-2.31991	-8.80595	-5.96597	-6.17928	-3.87876	-3.30909	-2.93126	-11.0175
119.7	-6.13594	-2.41576	-12.8078	1.03211	2.70967	-11.2598	-2.92726	-3.91311	-9.01081	-6.77406	-8.65814	-2.65008	-3.1233	-3.55834	-11.231
119.8	-6.51144	-4.97462	-12.9841	-1.46514	3.23856	-13.0295	-5.01949	-6.05544	-10.084	-8.21508	-10.9227	-2.44399	-2.15181	-3.57004	-12.4951
119.9	-7.26816	-5.4218	-13.0017	-4.49382	2.87847	-13.1726	-6.03387	-7.19077	-9.32632	-9.85695	-11.9159	-1.8407	-3.04205	-4.3898	-13.7358
120	-7.19854	-4.80306	-11.7008	-7.40671	3.22445	-11.6766	-6.99465	-9.07457	-7.31338	-10.0123	-13.0625	-2.25516	-5.06223	-6.70318	-14.783
120.1	-7.27843	-4.80691	-10.9955	-9.53095	2.69703	-9.86722	-7.76461	-10.0945	-6.69114	-9.48794	-14.3704	-3.38348	-6.78213	-8.52009	-15.246
120.2	-7.48045	-5.77813	-11.5064	-10.5518	0.84489	-10.68	-7.2252	-9.27727	-7.59086	-8.37389	-14.7821	-3.92133	-6.81546	-9.11257	-15.3268
120.3	-8.60469	-6.13281	-12.618	-11.208	-1.86978	-11.5387	-8.28386	-6.68393	-8.06998	-8.19172	-14.9075	-5.34961	-6.83581	-8.8949	-15.0318
120.4	-10.521	-4.2932	-12.7997	-11.3779	-3.47246	-11.3684	-9.79355	-3.87457	-6.67704	-7.47939	-13.6692	-5.96164	-9.07778	-8.40564	-14.2125
120.5	-10.8189	-2.01831	-13.1524	-10.5357	-5.09526	-10.8618	-12.3549	-1.97618	-6.12383	-6.81726	-13.0942	-6.44851	-9.56255	-8.60374	-12.7466
120.6	-10.4411	0.12968	-13.7873	-8.33408	-6.69631	-9.52561	-13.524	-1.19875	-6.92322	-7.57164	-13.0997	-6.09605	-7.82636	-8.50089	-11.1636
120.7	-10.8749	0.08514	-14.8758	-5.22164	-7.81946	-7.33071	-13.9282	0.68985	-7.13146	-9.25906	-12.1551	-4.77656	-4.18813	-7.26307	-9.77975
120.8	-11.5848	-0.21355	-13.2827	-2.77612	-6.31579	-1.13674	-14.4547	4.79286	-6.00898	-9.17264	-9.58167	-1.3701	-1.15413	-4.96613	-8.27168
120.9	-10.408	1.34353	-8.75619	0.7416	-3.4595	5.68509	-13.0496	9.67809	-2.64225	-6.53817	-6.87018	3.88842	1.20105	-2.44048	-6.93663
121	-8.40267	3.33568	-2.82387	5.06431	0.43327	14.3216	-9.17508	15.411	1.17392	-3.74839	-3.56919	9.7982	2.78552	-0.48727	-6.0328
121.1	-5.67597	6.79473	3.27989	11.005	5.78519	23.5409	-2.50398	20.8299	4.50108	-1.12793	-1.25832	17.0078	5.21765	1.86062	-5.50379
121.2	-2.50414	10.7635	10.5304	19.267	12.3907	33.3934	5.80396	27.9868	10.0108	2.1348	2.12116	25.1681	6.88573	5.13369	-5.16038
121.3	1.2749	15.4939	18.8229	28.5539	19.4539	41.6914	14.6578	36.371	16.9663	7.02422	7.06691	32.1174	8.4912	9.03347	-4.78603
121.4	7.35148	20.7078	27.6646	38.8101	26.6578	47.3045	24.9232	45.5852	22.8652	15.007	12.3759	38.974	12.1162	12.7998	-3.90078
121.5	12.2137	26.1173	34.9878	49.392	33.3954	50.6058	34.9558	55.1801	27.6624	22.9046	16.5498	44.6694	16.3625	16.2036	-1.73465
121.6	16.5885	29.923	39.6195	61.8674	38.8845	54.305	43.1394	63.7811	31.3234	29.833	20.0436	49.2178	21.8842	18.6522	2.25232
121.7	21.8844	33.6519	42.7055	74.6516	42.1423	58.1244	50.2056	70.3305	32.9942	38.263	23.2201	51.8872	26.974	20.5995	6.64718
121.8	27.5752	39.017	44.4581	84.7515	44.502	62.371	57.1643	75.7797	32.6662	46.7527	24.6562	53.2403	31.5695	20.9075	10.2989
121.9	32.7216	43.959	46.263	90.5178	47.8176	64.1418	63.1191	79.4246	30.3634	54.036	26.0588	53.6632	39.1576	21.1267	13.9954
122	35.3456	48.6918	48.7735	93.8966	52.3475	64.5847	65.5515	81.9567	27.8165	60.1364	25.9712	53.466	47.6154	21.914	18.272
122.1	35.2759	50.354	52.7517	94.9718	56.4144	65.7924	62.8666	82.1983	26.2205	64.1523	26.0425	53.0444	52.1683	22.4498	21.7881
122.2	34.9792	50.9059	56.2134	94.237	58.7413	66.5028	59.6445	79.6119	25.8102	64.9184	26.0114	52.3242	53.2018	21.3058	23.1745
122.3	35.6549	50.1541	57.7021	90.7891	59.3755	65.9596	57.6237	75.5764	25.2546	61.9324	26.6382	50.5267	52.3302	18.864	21.9296
122.4	34.7829	46.8919	57.5614	85.249	59.4365	63.3426	56.1292	72.477	25.0945	57.245	26.056	48.2354	50.0932	16.6515	19.5353
122.5	32.031	41.5003	56.8143	80.5911	59.191	59.7311	51.9402	70.4916	25.5947	51.0535	24.405	46.0967	46.965	15.5761	17.138
122.6	28.6732	36.1049	54.8521	76.8237	57.1642	55.9932	47.5067	68.5382	25.3701	45.5172	21.5367	43.8947	41.8445	15.2099	14.4694
122.7	25.9259	30.7397	51.3479	71.674	52.0965	55.0311	44.3581	65.0332	23.9134	39.3747	17.9214	41.2969	33.661	14.3407	11.2321
122.8	24.0518	28.02	44.8751	65.9964	46.5367	56.0695	43.816	62.829	22.3102	33.0443	14.4143	39.0649	25.8551	13.3592	7.24876
122.9	22.3055	26.0175	37.2349	60.507	41.8376	55.1397	45.3276	60.3186	20.3232	27.5033	11.6201	37.2314	20.9736	12.5304	3.9725
123	20.8606	24.0231	31.9013	55.4478	38.5887	52.7411	45.6709	57.0091	18.7252	23.2503	9.29757	34.3336	18.6234	11.0613	1.81623
123.1	18.7502	22.7056	27.8038	50.6282	34.9973	49.7773	44.6749	52.748	17.6967	20.52	6.84329	31.8282	17.0822	8.99963	-0.05947
123.2	17.7629	21.4589	24.0374	45.3024	32.0765	47.2439	44.5873	48.1075	15.0224	19.4527	6.78405	29.3783	13.6844	7.28567	-1.7867
123.3	16.7814	21.022	20.9034	40.5952	29.6373	42.7309	42.6922	43.7933	13.0032	20.3612	7.95632	27.952	10.6627	5.36021	-2.64675
123.4	16.8339	19.8738	18.6223	37.5388	26.7136	37.6767	40.546	40.7121	11.8488	20.4301	9.10321	26.5534	10.2741	3.07325	-2.96156
123.5	15.575	17.2405	18.3648	36.6212	23.1431	31.7491	38.2154	37.4027	10.2293	20.5586	8.6216	24.006	9.88883	0.81167	-2.60815
123.6	13.6632	13.6762	18.8412	35.3763	18.978	26.7784	36.5936	33.461	7.79933	20.7664	6.96786	21.4441	7.84692	-1.32956	-2.81457
123.7	11.1111	10.2068	19.1821	33.8306	15.7111	22.6227	33.7158	29.8823	5.17615	21.4192	5.33644	19.4364	4.33982	-1.22129	-4.34746
123.8	8.84209	7.31758	19.9721	32.0516	12.511	18.4449	29.9451	27.159	3.52096	22.5952	4.2336	18.1199	1.9943	-0.71008	-5.53663
123.9	6.30143	5.4518	20.7618	30.1755	9.05824	13.9967	24.5489	24.453	3.78959	21.8968	2.99347	17.4748	3.02466	0.54019	-6.30268
124	3.86806	4.3518	18.5524	27.6841	6.05739	9.67268	22.0182	23.0074	4.94056	18.0047	1.52765	17.8225	3.21709	1.87374	-5.88291
124.1	2.77464	3.05042	15.9046	25.1576	4.37202	6.244	21.0491	21.1468	4.87917	14.5971	-0.12397	17.5703	1.18061	3.34891	-5.03038
124.2	2.77806	1.64225	12.9466	22.471	3.77761	5.16588	19.5537	19.6252	3.66696	13.3442	-2.83253	15.0846	0.78577	4.51953	-4.63533
124.3	2.84769	1.05211	10.9687	20.6318	4.30312	6.67337	17.2326	17.7974	3.18693	13.3885	-4.39516	11.8438	2.02325	5.63777	-5.37725
124.4	2.97894	1.33442	9.23592	19.7933	4.98612	8.68962	14.8786	16.1882	3.23611	14.1779	-6.26504	9.14604	3.55168	6.9352	-6.10374
124.5	3.13531	2.32191	7.07587	18.2259	5.80031	10.6024	15.0159	15.1718	2.56062	12.9109	-7.73181	6.51725	2.61879	8.83204	-5.96096
124.6	2.75866	2.11647	6.29227	17.3755	5.80309	12.0619	14.771	14.3835	1.59186	11.6427	-9.25854	3.74771	1.93858	9.64439	-6.34021
124.7	1.9015	1.14723	5.79481	16.8074	5.74314	16.1153	14.3422	12.5212	-0.4041	10.1141	-11.6215	0.54817	1.6812	8.19859	-7.43245
124.8	1.9209	0.94751	4.96987	17.2764	6.17799	18.4836	14.159	11.1503	-1.13881	8.21183	-12.1541	-0.3593	3.58452	6.23653	-9.13118
124.9	1.00097	2.6237	4.00235	18.6989	6.98542	17.1161	16.0435	11.2117	-1.80855	6.84088	-11.3673	0.84787	4.1392	5.29291	-9.41078
125	0.27507	4.12061	2.85238	18.0347	8.59132	15.3788	16.7477	11.5831	-1.89028	4.94443	-10.0675	2.35099	4.19783	4.62124	-8.81878
125.1	-0.32072	3.83632	3.13437	17.5078	9.83127	13.9319	14.6813	10.9924	-1.78617	2.345	-8.58181	3.65987	4.41662	2.33609	-7.94387
125.2	-1.50887	3.1935	3.88398	17.6408	10.075	13.6049	12.5323	10.3953	-1.89295	-0.34786	-7.26458	4.07777	5.50334	-0.08632	-7.43149
125.3	-1.35137	2.21217	3.58927	17.3946	10.3894	14.426	9.42052	9.70142	-3.54239	-2.63668	-6.0778	3.56418	7.29354	-1.62034	-7.36609
125.4	-2.07499	1.15231	2.6846	16.5754	10.6173	13.4409	6.32873	10.3757	-5.88803	-3.9434	-3.74755	2.06865	9.11002	-1.41559	-7.65454
125.5	-2.9584	-1.01789	1.61167	13.5887	10.3058	12.3732	3.27096	10.6697	-8.12807	-4.08003	-2.28691	-1.53263	8.13188	-1.08489	-8.15962
125.6	-3.62837	-3.1496	0.06647	9.81424	8.87312	13.0408	1.14166	9.61643	-9.59741	-3.32916	-2.95242	-5.4415	5.93086	-1.21892	-8.80712
125.7	-3.62153	-4.02976	-1.96151	6.69269	6.16228	11.6043	-0.42771	7.77887	-10.9886	-2.73127	-2.71928	-7.58103	3.69586	-1.43859	-10.1141
125.8	-4.27895	-2.18774	-4.44978	4.55594	3.42779	7.55509	0.09098	6.37294	-12.9526	-2.16607	-3.07009	-8.93768	1.63935	-1.42842	-11.1041
125.9	-5.47966	1.14327	-7.40126	3.61606	2.1373	3.57273	2.05644	5.37614	-14.7875	-1.01816	-4.10413	-9.84458	0.68319	-1.74039	-11.1015
126	-6.61645	4.07924	-9.17073	4.01811	2.1279	0.68416	4.87568	5.25386	-14.4863	0.18113	-4.8603	-10.8849	-0.44076	-3.35607	-11.4027
126.1	-7.47361	6.32224	-9.74303	5.58715	2.10791	-1.98607	6.88334	4.22103	-13.2105	1.46334	-6.3089	-10.4648	-2.6151	-4.10121	-11.9613
126.2	-6.90978	7.56796	-9.88708	7.03279	2.09027	-3.5061	7.02855	1.95413	-12.2792	2.23523	-6.75155	-8.90977	-4.62798	-4.48923	-13.0952
126.3	-6.4247	8.3742	-9.44001	8.04434	1.8868	-6.54301	5.7954	-0.35506	-11.0447	1.77863	-5.60467	-6.73906	-5.03482	-4.81233	-14.3324
126.4	-5.75701	7.75172	-9.81836	8.14678	2.727	-7.46861	4.11808	-1.93077	-10.0515	0.68794	-5.05873	-5.17278	-3.60921	-5.47629	-15.753
126.5	-4.59739	5.89815	-9.67797	7.89741	3.74672	-5.1985	2.24309	-2.51343	-8.78216	0.26755	-4.5227	-5.62831	-2.63537	-6.54568	-16.2101
126.6	-2.95611	4.13926	-10.3383	7.90716	4.35612	-3.12165	-0.45185	-2.94965	-8.65033	0.2839	-5.00372	-5.139	-2.97296	-6.76649	-16.7803
126.7	-1.37534	3.27285	-10.8221	7.13527	3.808	-2.26292	-3.39368	-3.9354	-9.96245	0.9939	-4.53262	-4.49324	-4.49645	-6.36364	-16.647
126.8	-1.03179	3.66966	-11.8524	7.22053	2.90566	-1.91503	-5.04572	-3.84374	-11.3254	1.79381	-3.8337	-3.66795	-5.18063	-6.60204	-15.4772
126.9	-1.68236	3.10317	-12.7415	7.19233	3.36888	-1.7552	-5.80389	-2.6603	-11.3294	1.81133	-4.28627	-3.86582	-4.30604	-8.03682	-13.788
127	-4.26868	1.8657	-13.9423	6.8683	3.54283	-0.48172	-5.66172	-0.63088	-10.0272	1.00908	-6.43131	-4.25633	-3.73507	-9.18919	-11.9835
127.1	-5.85402	1.74055	-14.9543	6.64414	3.13956	0.45955	-5.14494	0.6661	-9.0207	0.69261	-7.72256	-4.64808	-4.68093	-9.21619	-10.3386
127.2	-6.52286	2.7882	-15.4836	5.72335	2.49548	1.13024	-4.01424	0.99733	-8.98155	0.2874	-8.88244	-5.60632	-7.07739	-8.81628	-9.27177
127.3	-6.22496	2.59871	-16.2212	5.06212	2.37824	1.0498	-4.23357	0.78109	-9.56296	-0.88036	-8.73654	-5.95831	-9.7708	-9.04375	-9.31219
127.4	-5.89054	0.03567	-16.4949	2.8664	2.63078	0.35299	-4.08437	2.15224	-9.27973	-3.20421	-8.6552	-5.54504	-11.3442	-9.89812	-9.97401
127.5	-4.96604	-1.6911	-15.1808	0.82419	2.63415	-1.28195	-2.94626	3.09924	-9.24142	-5.7546	-8.04741	-4.67921	-11.9935	-9.55848	-10.7675
127.6	-3.54049	-1.63061	-14.6802	-0.31674	2.19723	-3.90204	-1.42612	2.94363	-9.71402	-7.00644	-7.02139	-4.39318	-12.0494	-7.94595	-11.5825
127.7	-1.71204	1.28304	-14.4483	0.38199	0.97755	-5.70935	-1.46756	1.53103	-11.1024	-7.43501	-6.29556	-3.83277	-11.9413	-6.18057	-12.1059
127.8	0.67568	3.35833	-13.6826	1.9697	-0.58928	-5.0606	-0.87322	0.89171	-12.3054	-6.93871	-6.56386	-3.26814	-12.0448	-5.89692	-12.4572
127.9	2.53952	4.2287	-13.4593	4.12681	-1.58447	-4.65526	-0.81107	-0.21237	-13.9067	-7.58448	-7.36878	-2.37351	-10.8835	-5.87658	-12.939
128	3.13759	5.14339	-12.6114	5.29846	-1.84583	-6.09171	-0.60561	-1.25249	-14.1793	-7.93598	-8.54988	-2.03467	-10.6146	-4.54988	-12.6173
128.1	2.58061	6.89435	-11.8052	4.77109	-2.69807	-8.32944	-1.2735	-3.71979	-14.0128	-8.40425	-8.92419	-2.50995	-9.77761	-2.21425	-11.963
128.2	0.96216	7.74063	-11.7825	4.10314	-3.38739	-8.45689	-2.27514	-5.48757	-14.1948	-8.80947	-10.2055	-3.34995	-9.60318	-1.3654	-12.1421
128.3	-1.13223	5.99187	-10.8409	3.2036	-3.2155	-6.68927	-3.33077	-5.71713	-13.0292	-9.28591	-10.7165	-3.37157	-10.594	-2.21606	-12.9363
128.4	-2.3706	1.9925	-9.55691	2.0663	-0.72812	-5.34475	-4.413	-5.74838	-12.7909	-9.11192	-10.2819	-3.50105	-12.75	-3.68439	-14.0099
128.5	-4.79941	-3.6573	-9.30084	0.70761	2.85493	-7.87917	-6.25986	-5.03386	-12.7487	-9.64558	-10.1446	-4.89985	-13.6562	-4.01119	-14.9296
128.6	-8.0032	-8.1101	-9.32824	-0.13217	5.70813	-10.6967	-7.77202	-3.87353	-12.2308	-9.61055	-10.7532	-5.33282	-14.3886	-4.57488	-16.2217
128.7	-11.5277	-11.219	-8.6383	-0.87861	6.08701	-11.2441	-6.41875	-2.62322	-11.6368	-9.08739	-10.9007	-6.02869	-14.6909	-6.44321	-17.6159
128.8	-12.7592	-13.3305	-7.25036	-0.78827	6.13622	-10.424	-4.44588	-1.8264	-10.4777	-7.61251	-11.0614	-6.37236	-14.4665	-8.90336	-18.5243
128.9	-13.4269	-13.4173	-6.21803	-2.11153	6.50571	-8.33779	-1.23891	-2.66675	-10.2009	-6.08625	-10.0898	-6.90019	-12.5579	-10.2516	-18.0675
129	-12.8939	-12.1743	-6.83679	-3.97131	6.4662	-6.6339	1.43436	-3.62626	-10.539	-4.87177	-8.9924	-7.12504	-8.93627	-10.2051	-16.6524
129.1	-12.6245	-11.2457	-7.05617	-5.83809	4.90967	-3.85711	2.95355	-4.01665	-10.929	-4.02515	-9.06039	-6.57923	-3.88209	-9.22465	-15.4086
129.2	-12.8425	-9.79704	-6.5345	-7.19805	3.61361	-3.50923	3.25119	-4.20892	-10.6322	-2.77564	-8.74452	-5.94376	-1.09015	-8.81049	-14.0241
129.3	-12.2821	-6.75439	-5.70394	-8.12519	2.49252	-3.30447	2.85319	-4.81742	-9.88338	-1.97222	-7.73104	-4.76793	-0.11533	-8.62456	-12.6787
129.4	-11.6202	-5.02136	-6.28308	-9.73877	2.20516	-2.59826	0.90066	-5.54777	-9.55833	-1.71648	-6.53578	-4.49137	1.04194	-8.12893	-11.0246
129.5	-10.9376	-4.93041	-7.82633	-11.3464	1.65761	-0.89228	-0.73638	-6.11627	-9.46011	-1.00648	-6.57793	-5.71277	2.24885	-7.83074	-9.89136
129.6	-9.568	-6.34671	-9.29228	-11.5053	1.04249	0.23389	-2.72674	-6.94933	-10.0009	0.62605	-6.45931	-7.08891	2.3391	-7.99709	-9.97566
129.7	-8.29196	-7.7772	-10.2933	-10.9781	0.68534	-1.46686	-5.49466	-8.14757	-9.35108	1.12819	-7.63866	-7.74814	2.04546	-8.43463	-10.9269
129.8	-7.71443	-7.41428	-10.5959	-10.4702	1.06437	-2.34858	-7.47913	-8.34088	-8.55246	0.81406	-8.19109	-8.67141	0.5403	-9.57322	-11.4558
129.9	-7.40056	-7.08358	-10.4393	-11.9058	-0.26211	-1.45537	-8.02423	-10.1503	-8.48602	1.02893	-8.75155	-9.33609	-0.27736	-10.6126	-11.0694
130	-6.81276	-8.45775	-10.9157	-13.5563	-2.01419	1.78213	-9.23894	-10.9011	-9.3748	1.59763	-9.8681	-10.0682	0.19842	-10.6076	-10.3112
