# Supplementary material for: Corticothalamic gating of population auditory thalamocortical transmission in mouse
Source: eLife. 2021 May 24;10:e56645. doi: 10.7554/eLife.56645 (PMC8186908; doi:10.7554/eLife.56645)
Supplement: Figure 2—source data 5. [file elife-56645-fig2-data5.xlsx]

## Sheet: Figure 2H
Time	Df/f
(s)	AC
0.25	-0.025864
0.5	-0.127833
0.75	-0.186428
1	-0.174497
1.25	-0.153211
1.5	-0.165806
1.75	-0.0480771
2	-0.102225
2.25	-0.26864
2.5	-0.420282
2.75	-0.460444
3	-0.392932
3.25	-0.498469
3.5	-0.240218
3.75	-0.150583
4	0.0810676
4.25	0.506472
4.5	0.774602
4.75	0.901625
5	1.29329
5.25	1.06787
5.5	0.952409
5.75	0.527631
6	0.483722
6.25	0.363943
6.5	0.00936441
6.75	-0.152279
7	-0.241701
7.25	-0.281095
7.5	-0.131276
7.75	-0.408471
8	-0.572118
8.25	-0.365401
8.5	-0.510417
8.75	-0.413075
9	-0.193342
9.25	-0.1931
9.5	-0.112705
9.75	-0.173818
10	-0.135842
10.25	-0.290386
10.5	-0.230574
10.75	-0.109508
11	-0.156467
11.25	-0.284214
11.5	-0.114408
11.75	-0.133088
12	-0.195434
12.25	-0.107049
12.5	-0.0651783
12.75	-0.122687
13	-0.0208963
13.25	-0.0768092
13.5	-0.0934084
13.75	-0.0795946
14	-0.0453585
14.25	-0.0768112
14.5	-0.108654
14.75	-0.00318457
15	0.0628265
15.25	-0.176475
15.5	-0.159266
15.75	-0.133065
16	-0.169871
16.25	-0.188745
16.5	-0.233844
16.75	0.174376
17	0.142858
17.25	0.156063
17.5	0.0916551
17.75	0.0166712
18	0.00072158
18.25	0.0375246
18.5	-0.134199
18.75	-0.174853
19	-0.117285
19.25	-0.144312
19.5	-0.143423
19.75	-0.0934785
20	-0.044237
20.25	-0.0772272
20.5	-0.117688
20.75	-0.0487689
21	-0.150985
21.25	-0.139209
21.5	-0.049253
21.75	-0.0994272
22	-0.215843
22.25	-0.0201889
22.5	-0.0590604
22.75	-0.0994816
23	-0.170771
23.25	-0.142946
23.5	0.00552713
23.75	-0.0234739
24	0.00746816
24.25	0.0924161
24.5	-0.0511457
24.75	-0.0177736
25	-0.071896
25.25	0.00310784
25.5	-0.00587746
25.75	0.0951686
26	0.0607102
26.25	-0.0440559
26.5	-0.0527352
26.75	-0.104857
27	-0.103878
27.25	-0.0518744
27.5	-0.11939
27.75	-0.142331
28	-0.118913
28.25	-0.0558555
28.5	-0.00909744
28.75	-0.0671624
29	-0.100912
29.25	-0.119193
29.5	0.0263135
29.75	-0.0465155
30	-0.0967562
30.25	0.0121121
30.5	-0.0231558
30.75	-0.272464
31	0.0421776
31.25	-0.0450882
31.5	-0.0713482
31.75	-0.120843
32	-0.158222
32.25	-0.0441018
32.5	-0.0468498
32.75	-0.0777169
33	-0.115629
33.25	-0.173579
33.5	-0.172815
33.75	-0.0730255
34	-0.0659555
34.25	-0.109883
34.5	-0.113777
34.75	-0.0386374
35	-0.221095
35.25	-0.149359
35.5	0.0996197
35.75	0.063943
36	-0.0545683
36.25	-0.0131615
36.5	-0.0343251
36.75	0.0205101
37	-0.146991
37.25	-0.0638993
37.5	-0.105569
37.75	-0.0620468
38	0.0881632
38.25	-0.0378409
38.5	0.0152071
38.75	-0.026471
39	-0.000643602
39.25	0.0335798
39.5	-0.178079
39.75	-0.165749
40	-0.175545
40.25	-0.0683931
40.5	-0.00330981
40.75	-0.0876881
41	-0.0126751
41.25	0.0258226
41.5	-0.00310731
41.75	-0.104106
42	0.0173063
42.25	-0.0545269
42.5	-0.0947895
42.75	-0.0343316
43	-0.0201227
43.25	-0.144242
43.5	-0.0140904
43.75	-0.0463528
44	0.0210169
44.25	0.136862
44.5	0.209347
44.75	0.64728
45	0.766678
45.25	0.885696
45.5	0.950182
45.75	0.911244
46	0.752976
46.25	0.554547
46.5	0.29126
46.75	-0.268161
47	-0.326158
47.25	-0.322708
47.5	-0.40803
47.75	-0.405978
48	-0.249582
48.25	-0.283037
48.5	-0.302082
48.75	-0.343962
49	-0.276228
49.25	-0.256566
49.5	-0.243346
49.75	-0.251424
50	-0.366071
50.25	-0.274587
50.5	-0.213814
50.75	-0.277073
51	-0.149076
51.25	-0.218174
51.5	-0.176557
51.75	-0.202116
52	-0.175434
52.25	-0.134185
52.5	0.0573517
52.75	-0.0845815
53	0.0661061
53.25	-0.336713
53.5	-0.146682
53.75	0.0396553
54	-0.126117
54.25	0.0202863
54.5	-0.156339
54.75	-0.233966
55	0.0849732
55.25	-0.0255335
55.5	-0.0723379
55.75	0.00433667
56	-0.0581457
56.25	-0.0814205
56.5	-0.0698885
56.75	-0.0753317
57	-0.0411562
57.25	-0.159143
57.5	-0.1707
57.75	-0.125767
58	-0.0995575
58.25	-0.137152
58.5	-0.0527364
58.75	-0.0820169
59	-0.0606463
59.25	0.02722
59.5	-0.0116972
59.75	-0.00909271
60	-0.118086
60.25	0.0486796
60.5	-0.00133071
60.75	-0.0405383
61	-0.116079
61.25	-0.0136648
61.5	-0.0898287
61.75	0.016248
62	0.0297498
62.25	0.00926657
62.5	-0.00475871
62.75	0.104326
63	-0.000606212
63.25	-0.112888
63.5	0.00763033
63.75	-0.0562114
64	-0.0963983
64.25	-0.0192437
64.5	-0.0396338
64.75	-0.0166278
65	-0.0275076
65.25	-0.077991
65.5	-0.214825
65.75	-0.146778
66	0.0907307
66.25	-0.1075
66.5	0.0556205
66.75	-0.0656609
67	-0.163758
67.25	-0.142689
67.5	-0.232591
67.75	-0.253302
68	-0.220275
68.25	-0.333903
68.5	-0.349195
68.75	-0.12633
69	-0.0866097
69.25	-0.0562222
69.5	-0.135926
69.75	0.0932312
70	0.198963
70.25	0.262673
70.5	0.178351
70.75	0.0896997
71	0.0468873
71.25	0.0120692
71.5	0.0132643
71.75	-0.00681319
72	0.0207378
72.25	0.0123897
72.5	0.0565096
72.75	0.236965
73	0.386562
73.25	0.560065
73.5	0.728971
73.75	0.731591
74	0.796139
74.25	0.682387
74.5	0.540088
74.75	0.535234
75	0.268257
75.25	0.0497027
75.5	-0.036052
75.75	-0.320977
76	-0.362013
76.25	-0.446944
76.5	-0.385632
76.75	-0.495629
77	-0.448319
77.25	-0.469838
77.5	-0.304703
77.75	-0.310061
78	-0.551221
78.25	-0.260306
78.5	-0.206112
78.75	-0.308296
79	0.0750789
79.25	0.00644875
79.5	0.0583159
79.75	0.0906537
80	0.0337538
80.25	0.0580956
80.5	-0.0288251
80.75	-0.132715
81	-0.100035
81.25	-0.0364947
81.5	-0.0642119
81.75	-0.214647
82	-0.192618
82.25	-0.147121
82.5	-0.217285
82.75	-0.0906353
83	-0.164742
83.25	-0.0621864
83.5	-0.104193
83.75	-0.166676
84	-0.076905
84.25	-0.0763732
84.5	-0.068466
84.75	-0.114545
85	-0.0734928
85.25	-0.0597277
85.5	-0.121231
85.75	-0.0498818
86	-0.0606718
86.25	-0.136997
86.5	-0.120066
86.75	-0.0780534
87	-0.0741764
87.25	0.0785875
87.5	0.0690028
87.75	0.0246742
88	0.0557347
88.25	0.0179316
88.5	0.0701808
88.75	-0.0167238
89	0.159089
89.25	-0.0661502
89.5	-0.0702012
89.75	-0.0804087
90	-0.195018
90.25	-0.1111
90.5	-0.087766
90.75	-0.144322
91	-0.1277
91.25	-0.0872192
91.5	-0.110588
91.75	-0.0949777
92	-0.0577608
92.25	-0.183332
92.5	0.0409174
92.75	-0.0250357
93	-0.0925927
93.25	-0.065904
93.5	0.0499143
93.75	-0.141237
94	-0.075238
94.25	-0.0441266
94.5	-0.0276556
94.75	-0.0552933
95	-0.103199
95.25	-0.0596643
95.5	-0.210248
95.75	-0.0960136
96	-0.0870811
96.25	-0.0647461
96.5	-0.0352287
96.75	-0.12274
97	-0.142818
97.25	0.0411554
97.5	0.0782169
97.75	0.0901389
98	0.119177
98.25	0.075813
98.5	0.0100155
98.75	-0.0319704
99	0.0342064
99.25	0.0904877
99.5	-0.00520658
99.75	-0.196977
100	-0.0171149
100.25	-0.0607501
100.5	-0.0628388
100.75	-0.0894526
101	0.0348661
101.25	-0.141836
101.5	-0.197705
101.75	-0.0611701
102	-0.0182642
102.25	-0.0474308
102.5	-0.0103528
102.75	-0.00957329
103	-0.072597
103.25	-0.0518026
103.5	-0.00799101
103.75	-0.0506239
104	-0.134714
104.25	-0.086091
104.5	-0.146826
104.75	-0.154775
105	-0.125942
105.25	-0.253464
105.5	-0.204001
105.75	-0.164449
106	-0.128997
106.25	-0.234253
106.5	-0.0950954
106.75	-0.0743242
107	-0.0460971
107.25	-0.0332576
107.5	0.0153888
107.75	-0.0441213
108	-0.0575827
108.25	-0.111564
108.5	-0.10523
108.75	-0.0622858
109	-0.125023
109.25	-0.173589
109.5	-0.0458483
109.75	-0.052654
110	-0.0299243
110.25	-0.0389844
110.5	0.0257087
110.75	-0.0742112
111	-0.029223
111.25	-0.00116791
111.5	-0.0658479
111.75	-0.0894829
112	0.0444564
112.25	0.0573217
112.5	0.0213402
112.75	-0.032415
113	0.0715936
113.25	-0.00479231
113.5	0.0691691
113.75	0.0188875
114	-0.101504
