# Supplementary material for: Corticothalamic gating of population auditory thalamocortical transmission in mouse
Source: eLife. 2021 May 24;10:e56645. doi: 10.7554/eLife.56645 (PMC8186908; doi:10.7554/eLife.56645)
Supplement: Figure 3—source data 1. [file elife-56645-fig3-data1.xlsx]

## Sheet: Figure 3B
c	IC	Df/f			MGB	Df/f			sWM	Df/f
(s)	Stimulation	IC	MGB	AC	Stimulation	IC	MGB	AC	Stimulation	IC	MGB	AC
0.25		-0.000700991	0.0104147	-0.0942066		0.0405302	-0.311698	-0.0705964		0.0528525	0.00939276	-0.303938
0.5		-0.0368794	-0.0664385	-0.130868		0.034453	-0.265477	-0.0617073		0.0400907	-0.0396469	-0.420521
0.75		-0.108578	-0.000410979	-0.105318		-0.127844	-0.389182	-0.214991		0.0288805	-0.0616144	-0.520585
1		-0.159229	-0.104716	-0.0926115		-0.000303006	-0.294142	-0.200589		0.0283707	-0.0909788	-0.600111
1.25		-0.103967	-0.0118138	-0.0511081		-0.0821375	-0.322824	-0.208627		0.0536785	-0.0665111	-0.577107
1.5		-0.212525	-0.0521857	-0.12512		-0.0607097	-0.270628	-0.184395		-0.0167887	-0.109217	-0.660842
1.75		-0.132442	-0.0558423	-0.029105		-0.0793464	-0.334883	-0.236315		-0.0477446	-0.106407	-0.647414
2		-0.111198	0.0036788	-0.0639297		-0.140386	-0.268811	-0.242895		0.0695785	-0.0824475	-0.564843
2.25		-0.151679	-0.0726201	-0.104352		-0.020233	-0.33232	-0.262508		0.0194415	-0.0708246	-0.601954
2.5		-0.141259	-0.172509	-0.125145		-0.0858989	-0.272327	-0.249369		-0.0625712	-0.11038	-0.599922
2.75		-0.262216	-0.104828	-0.0937995		-0.0754988	-0.170535	-0.228109		0.028786	-0.128963	-0.509666
3		-0.128397	-0.103333	-0.0628269		-0.105096	-0.228234	-0.24141		-0.0226069	-0.0844134	-0.515769
3.25		-0.239276	-0.121534	-0.109705		-0.0960522	-0.356715	-0.220949		-0.0899099	-0.12637	-0.502974
3.5		-0.0887775	-0.0516596	-0.0296799		-0.0823656	-0.309089	-0.254321		-0.0166279	-0.0993443	-0.527845
3.75		-0.185412	-0.131847	-0.0933115		-0.00969418	-0.29191	-0.175922		0.121976	0.00128756	-0.397432
4		-0.186903	-0.0648933	-0.0935328		-0.0422115	-0.404758	-0.245405		0.00470596	0.0437833	-0.30588
4.25		-0.254564	-0.0666814	-0.167735		0.00925492	-0.17506	-0.135809		0.0194154	-0.0388163	-0.384029
4.5		-0.214435	-0.0957604	-0.123668		-0.0453489	-0.191674	-0.126344		0.00209998	-0.161553	-0.461944
4.75		-0.253072	-0.0583687	-0.0964302		-0.0969168	-0.181103	-0.138808		0.0494448	-0.0721008	-0.377981
5		-0.201927	-0.0226366	-0.0829768		0.00214946	-0.10357	-0.0749943		-0.0303517	-0.0771954	-0.465675
5.25		-0.0932803	-0.0384957	-0.0560822		-0.00934259	-0.0850434	-0.0268451		-0.179648	-0.150095	-0.629676
5.5		-0.0835049	0.0039338	-0.0217422		0.0292827	0.0460591	-0.0499493		-0.322789	-0.225972	-0.62219
5.75		-0.0861478	-0.0509631	-0.0259329		0.0135332	0.000233649	-0.0146513		-0.223073	-0.17832	-0.637113
6		-0.169607	0.0345052	0.0192193		-0.0581638	-0.151965	-0.0628434		-0.2243	-0.188303	-0.569586
6.25		-0.0833855	0.0922	0.120055		-0.104532	-0.0320216	-0.0614825		-0.184686	-0.137129	-0.538876
6.5		-0.143284	0.00897795	-0.00160169		-0.0341159	-0.135711	-0.069239		-0.104369	-0.0472713	-0.419057
6.75		-0.175474	-0.045846	0.0350253		-0.0273015	-0.143545	-0.121659		-0.125607	-0.0877703	-0.405804
7		-0.094648	0.0826075	0.0542995		-0.0215361	-0.0537352	-0.0751338		-0.0304528	-0.0125744	-0.338325
7.25		0.065959	0.0507966	0.0922746		-0.048013	-0.0480587	-0.0674982		0.0215915	0.0172189	-0.272147
7.5		0.230174	0.142719	0.176009		0.0186045	0.310779	0.0521474		-0.0724834	0.0431906	0.418847
7.75		0.43482	0.211379	0.444441		-0.084842	0.788429	0.222215		-0.0585052	0.103676	1.24378
8		0.578886	0.144144	0.802425		-0.0163063	1.09603	0.414049		0.0709168	0.291979	1.97084
8.25		0.768652	0.230403	0.999375		0.0341981	1.21832	0.664074		0.132539	0.309333	2.45617
8.5		0.758334	0.191966	1.09551		0.0110568	1.09342	0.661526		0.0124828	0.261138	2.54634
8.75		0.756766	0.308477	1.21123		0.0653417	0.896157	0.665596		0.0179928	0.194161	2.28356
9		0.624809	0.217073	1.06789		0.0251064	0.743686	0.517021		0.101114	0.165016	1.94986
9.25		0.476105	0.209567	0.841132		0.149995	0.61584	0.490265		0.0215352	0.138165	1.55
9.5		0.347191	0.103987	0.607196		0.0786858	0.353184	0.312219		0.0294745	0.0689863	1.12167
9.75		0.221313	0.22098	0.497818		0.0912416	0.0671401	0.150273		0.0894926	0.109243	0.715208
10		0.014479	-0.0591806	0.235605		0.0437085	-0.171661	-0.0198768		0.121215	0.153963	0.211997
10.25		-0.0643386	0.00249875	0.103883		0.0202197	-0.389174	-0.111282		0.0972553	0.07411	-0.122402
10.5		-0.133878	-0.0592121	-0.0772225		0.0606849	-0.359815	-0.149927		-0.103504	-0.0316575	-0.523492
10.75		-0.08366	0.0926268	-0.0750959		0.0652988	-0.471217	-0.234522		-0.0134491	-0.0799607	-0.699749
11		-0.147259	-0.0850497	-0.179137		-0.0398203	-0.491838	-0.329599		0.01872	-0.0340504	-0.804821
11.25		-0.12579	-0.0290791	-0.264623		0.0237217	-0.488315	-0.243636		-0.0399923	-0.0428335	-0.848742
11.5		-0.234166	-0.115413	-0.307314		-0.0400715	-0.548157	-0.294786		-0.0879938	-0.174836	-0.951572
11.75		-0.232979	-0.109891	-0.290239		-0.0272232	-0.394562	-0.305988		-0.130644	-0.151565	-1.02122
12		-0.291616	-0.181088	-0.339847		-0.0722162	-0.422696	-0.24748		0.00610279	-0.0365221	-0.866394
12.25		-0.276513	-0.265532	-0.430419		-0.136931	-0.529438	-0.317894		-0.0515531	-0.118158	-0.864155
12.5		-0.295779	-0.0995103	-0.371605		-0.0956101	-0.426863	-0.245051		-0.0434389	-0.166	-0.879494
12.75		-0.359352	-0.228032	-0.349366		-0.16956	-0.447077	-0.308942		-0.0490736	-0.0686517	-0.772616
13		-0.260175	-0.161322	-0.29971		-0.218413	-0.336948	-0.298182		0.0304394	-0.193215	-0.782152
13.25		-0.241614	-0.0823088	-0.239542		-0.134806	-0.385006	-0.240546		-0.0597129	-0.164992	-0.825546
13.5		-0.215845	-0.0109704	-0.172078		-0.164414	-0.37679	-0.249891		0.0217797	-0.110805	-0.707601
13.75		-0.199915	-0.0139951	-0.160458		-0.0573035	-0.354305	-0.225498		0.0105049	-0.0235089	-0.688465
14		-0.219487	0.0136001	-0.165955		0.0731066	-0.234089	-0.173993		0.0305766	0.0494353	-0.591028
14.25		-0.208433	0.0200328	-0.180379		-0.0274316	-0.242429	-0.139221		-0.0477917	-0.124861	-0.617193
14.5		-0.261128	0.0619992	-0.13585		-0.00394874	-0.28211	-0.114476		0.0116451	0.0046083	-0.598214
14.75		-0.0849259	0.00433689	-0.173416		0.0635055	-0.243875	-0.0691986		0.0515952	0.0852195	-0.564749
15		-0.187809	-0.00132803	-0.165234		0.0289791	-0.162102	-0.0887391		0.00639449	-0.0356524	-0.605666
15.25		-0.142827	0.0807678	-0.16212		-0.0520358	-0.373468	-0.172324		-0.151715	-0.0843239	-0.599419
15.5		-0.109993	-0.0373004	-0.092496		-0.113507	-0.234251	-0.20541		0.0109565	-0.00484956	-0.506722
15.75		-0.156921	-0.103837	-0.158201		-0.106427	-0.239028	-0.17305		0.00510073	-0.0495364	-0.54809
16		-0.0789793	-0.122879	-0.169413		-0.0766869	-0.203125	-0.151086		0.0641094	-0.0270226	-0.42187
16.25		-0.101018	-0.136934	-0.112854		-0.00941163	-0.172068	-0.0829546		0.0598526	-0.107091	-0.418081
16.5		-0.100426	-0.0627621	-0.165661		-0.0809873	-0.168087	-0.125002		0.00538236	0.0683241	-0.386247
16.75		-0.0645209	-0.116409	-0.104731		-0.00317825	-0.148152	-0.0646965		0.00518807	-0.0628051	-0.348897
17		-0.0364433	-0.0377901	-0.108691		-0.0995472	-0.223055	-0.107214		-0.0144439	-0.0463726	-0.326124
17.25		-0.168168	0.000698001	-0.213877		0.00193826	-0.0426575	-0.0798591		-0.00392653	-0.133862	-0.303643
17.5		0.037278	-0.0164476	-0.189193		-0.0295894	0.167275	0.0561707		-0.0145973	0.0287085	0.344896
17.75		0.301578	0.197361	0.0898296		0.156495	0.785489	0.420924		-0.0263824	0.103439	1.01082
18		0.26987	0.295768	0.418876		0.183456	1.05048	0.516722		0.0532195	0.176211	1.65507
18.25		0.602398	0.294584	0.593744		0.0985532	1.11088	0.649771		0.0681278	0.261326	2.15977
18.5		0.604933	0.27804	0.579633		0.105513	0.95426	0.601227		0.0284269	0.305171	2.25091
18.75		0.656614	0.332889	0.540533		0.0587492	0.851836	0.542685		0.0914759	0.230846	2.00998
19		0.521071	0.289408	0.425508		0.0958972	0.702725	0.44285		0.0970354	0.160603	1.6626
19.25		0.455774	0.227021	0.372062		0.0231026	0.516088	0.272412		0.073328	0.233088	1.3767
19.5		0.33662	0.155089	0.220755		0.106471	0.304155	0.235024		0.0976058	0.0900376	0.946424
19.75		0.285667	0.0574969	0.11231		-0.0371441	0.0379666	0.0487741		0.0677818	0.0461567	0.509743
20		0.0124042	-0.0803177	-0.0404591		0.0470915	-0.0156566	-0.050148		-0.0882734	-0.0301433	0.0414239
20.25		0.0191958	-0.0725322	-0.0581304		0.0333998	-0.259454	-0.112924		0.0333167	0.0244129	-0.183559
20.5		-0.0633264	-0.0955171	-0.146115		-0.0193049	-0.31314	-0.174206		0.018249	0.0263058	-0.476334
20.75		-0.0996725	-0.134459	-0.204098		-0.0152308	-0.429076	-0.275279		-0.00702648	-0.0695433	-0.630191
21		-0.241366	-0.139109	-0.243768		0.0349259	-0.426712	-0.255405		-0.0279637	0.00412051	-0.658367
21.25		-0.240864	-0.0574362	-0.235481		0.0496484	-0.415626	-0.241393		-0.0192102	-0.00255836	-0.772417
21.5		-0.274373	-0.129872	-0.302734		-6.61477e-05	-0.464844	-0.177135		-0.0621056	-0.154987	-0.809982
21.75		-0.364583	-0.133006	-0.205325		0.00189536	-0.356536	-0.18354		-0.0579862	-0.0810599	-0.815203
22		-0.286125	-0.0369973	-0.19696		-0.0172106	-0.29287	-0.236358		-0.109077	-0.178753	-0.768648
22.25		-0.215853	-0.0590435	-0.210444		0.0124176	-0.307583	-0.182414		-0.0166017	-0.0371512	-0.702123
22.5		-0.291879	-0.135333	-0.238126		0.0431604	-0.265001	-0.167868		0.00455806	-0.0925496	-0.70689
22.75		-0.237375	-0.192118	-0.268695		0.0453752	-0.278763	-0.162776		0.0316769	-0.0422137	-0.598469
23		-0.252517	-0.154562	-0.227886		-0.00964283	-0.170733	-0.0549802		-0.00371125	-0.0158302	-0.609518
23.25		-0.225734	-0.166433	-0.208828		-0.0558249	-0.296951	-0.196063		0.014584	-0.0045278	-0.571324
23.5		-0.281	-0.0707443	-0.207114		-0.0583135	-0.250318	-0.162908		0.0250413	-0.0358156	-0.518171
23.75		-0.155235	-0.0148698	-0.14808		-0.0710935	-0.326501	-0.188235		-0.0562855	-0.100518	-0.575943
24		-0.213001	-0.134518	-0.185267		-0.0549336	-0.215376	-0.142653		-0.0422455	-0.13143	-0.535839
24.25		-0.153408	-0.0299239	-0.14941		-0.0746761	-0.242588	-0.103834		-0.0270919	-0.000723644	-0.506984
24.5		-0.251014	-0.0424072	-0.164906		-0.0374637	-0.31721	-0.119909		-0.055411	-0.103556	-0.559582
24.75		-0.260099	-0.102668	-0.21554		-0.107592	-0.349456	-0.202518		-0.0632144	0.0155149	-0.485717
25		-0.167917	-0.0251114	-0.118021		-0.0676245	-0.230984	-0.111668		-0.0695764	-0.0585921	-0.567239
25.25		-0.2077	0.000668496	-0.178853		-0.0831733	-0.22826	-0.116188		-0.00928086	-0.0842976	-0.427325
25.5		-0.230051	-0.134528	-0.177543		-0.0206635	-0.182508	-0.132292		-0.011481	-0.0209809	-0.434605
25.75		-0.110397	-0.0216327	-0.112216		-0.1081	-0.143556	-0.116454		0.0259312	-0.013068	-0.406868
26		-0.210561	-0.0822569	-0.144288		-0.0363589	-0.173846	-0.0846966		0.0130201	-0.0709172	-0.412779
26.25		-0.174497	-0.0139728	-0.14529		0.0147409	-0.201614	-0.1164		0.00300374	-0.0470785	-0.37768
26.5		-0.078914	-0.0202489	-0.0963624		-0.00376143	-0.173741	-0.0501979		-0.0545167	-0.0906802	-0.421158
26.75		-0.132881	-0.0688294	-0.0705514		-0.0626064	-0.143427	-0.107043		0.0267307	-0.0833075	-0.319896
27		-0.126328	0.00902913	-0.0586706		-0.0416466	-0.134111	-0.0230878		0.0576751	0.0374216	-0.283393
27.25		-0.116694	-0.0910425	-0.0845953		0.0716872	0.0705113	-0.0366173		0.0156392	-0.0650609	-0.298757
27.5		0.106934	-0.0383258	-0.0723445		0.102899	0.347278	0.129545		0.016059	0.0616534	0.305065
27.75		0.33351	0.200343	0.276193		0.0789404	0.730743	0.347833		0.0595166	0.20027	1.09536
28		0.419138	0.10961	0.484		0.0969121	1.04797	0.617751		0.111631	0.294593	1.74034
28.25		0.59659	0.235402	0.770725		0.188083	1.20308	0.758125		-0.0131142	0.220947	2.06668
28.5		0.617077	0.236099	0.790494		0.162061	1.10863	0.776274		0.11927	0.299897	2.21037
28.75		0.566688	0.187632	0.680737		0.170225	0.791258	0.635571		-0.0469601	0.0901561	1.90926
29		0.485655	0.192483	0.573282		0.112325	0.68296	0.586109		0.009141	0.148376	1.69153
29.25		0.439604	0.184976	0.485148		0.19689	0.496769	0.478046		-0.0421588	0.122203	1.28317
29.5		0.386437	0.196069	0.390471		0.0880632	0.311754	0.330634		-0.109461	0.0335895	0.782536
29.75		0.302583	0.210713	0.264411		0.133071	0.0511526	0.152668		-0.0350982	0.0301699	0.418661
30		0.0497586	0.0426435	0.0895142		0.0299867	-0.0946542	0.0390498		-0.107262	-0.0277752	0.0737352
30.25		0.0451615	0.0522599	0.00234419		-0.0679904	-0.250376	-0.0725301		0.0826688	0.0277926	-0.183154
30.5		-0.0417515	0.0396614	-0.0773376		-0.0687165	-0.376852	-0.183614		-0.0129886	-0.0438725	-0.422192
30.75		-0.23018	-0.0865849	-0.131997		-0.0976955	-0.474448	-0.243171		-0.00827744	-0.0500455	-0.618995
31		-0.179959	0.0489446	-0.133532		0.0639765	-0.307852	-0.175204		-0.0186262	-0.0606436	-0.707925
31.25		-0.262712	-0.0615455	-0.182347		-0.0389841	-0.389638	-0.300444		0.0582992	0.0603375	-0.640931
31.5		-0.264808	-0.0178235	-0.151073		0.00559769	-0.319659	-0.258071		0.0273294	-0.0223753	-0.720134
31.75		-0.259956	-0.0920207	-0.186229		-0.131328	-0.406831	-0.288658		-0.0247893	-0.143385	-0.805232
32		-0.148546	-4.76376e-05	-0.116282		-0.0976483	-0.344287	-0.293143		0.00642225	0.0281567	-0.664426
32.25		-0.190385	-0.089108	-0.155044		-0.260342	-0.499856	-0.385323		-0.0171747	-0.0854863	-0.669093
32.5		-0.229405	-0.0433349	-0.178608		-0.378759	-0.481634	-0.448474		0.0871104	-0.0835949	-0.602957
32.75		-0.152418	-0.0662847	-0.208419		-0.323734	-0.515752	-0.418298		0.0134934	-0.0158605	-0.591135
33		-0.212696	-0.189177	-0.245493		-0.358021	-0.55821	-0.387537		0.0787989	-0.12762	-0.611855
33.25		-0.27274	-0.166325	-0.304283		-0.32608	-0.401295	-0.301628		0.0713123	-0.0237917	-0.501903
33.5		-0.189263	-0.110347	-0.252969		-0.352242	-0.454072	-0.324343		0.0847689	-0.0840897	-0.553886
33.75		-0.224552	-0.130575	-0.257644		-0.293984	-0.533631	-0.320165		0.0496528	-0.0536177	-0.486881
34		-0.258494	-0.0652494	-0.277917		-0.123917	-0.351504	-0.231021		0.0198954	-0.00437181	-0.512018
34.25		-0.285573	-0.0896429	-0.190495		-0.0905542	-0.285285	-0.272721		0.162718	0.100175	-0.38743
34.5		-0.173844	0.036698	-0.181789		0.00951315	-0.127646	-0.117429		0.0727539	0.0265374	-0.392416
34.75		-0.0722363	-0.000664293	-0.087354		-0.057755	-0.120374	-0.146808		0.0174561	0.00206789	-0.433808
35		-0.179642	-0.0699313	-0.225167		-0.0434116	-0.197275	-0.216747		-0.0204885	-0.105755	-0.472667
35.25		-0.14502	-0.071083	-0.172194		-0.120338	-0.188126	-0.163968		-0.0676006	-0.0594978	-0.464058
35.5		-0.0183053	-0.0225872	-0.0771552		-0.0817838	-0.148197	-0.142583		-0.080091	-0.191463	-0.449305
35.75		-0.167313	-0.0893352	-0.127541		0.0255459	-0.0941374	-0.128979		-0.0685026	-0.133153	-0.424159
36		-0.169602	-0.0886575	-0.0797517		0.00280542	-0.0795397	-0.114593		0.00992632	-0.162001	-0.373926
36.25		-0.177565	-0.0747712	-0.0824825		0.0698634	-0.108853	-0.06784		-0.0844685	-0.0431449	-0.376698
36.5		-0.0523206	-0.0214761	-0.0334383		0.0161755	-0.106165	-0.0647234		-0.103761	-0.217034	-0.46968
36.75		-0.133466	-0.0798976	-0.0657939		-0.0168492	-0.276274	-0.18517		-0.0521941	-0.107347	-0.473874
37		-0.179364	-0.058813	-0.00229296		-0.0156187	-0.190133	-0.135152		0.0156322	-0.0869809	-0.280456
37.25		-0.166626	-0.054495	-0.0461005		-0.0941878	-0.116954	-0.130867		0.0394056	-0.0771725	-0.283907
37.5		-0.0538509	0.0480861	-0.0713957		-0.0114234	0.207788	-0.0069175		0.0221105	0.0738309	0.282281
37.75		0.120225	0.0585088	-0.138415		-0.0681778	0.650719	0.327697		0.131519	0.143177	1.09549
38		0.310802	0.161712	-0.0638494		0.144094	0.957327	0.705269		-0.134525	0.254286	1.56766
38.25		0.472701	0.242354	-0.0799014		0.122049	0.946305	0.930337		-0.000100602	0.292266	1.93241
38.5		0.485286	0.202641	-0.0355225		0.203302	1.04805	1.0536		-0.0469984	0.288271	2.00561
38.75		0.625816	0.30266	0.0364899		0.0904986	0.832112	0.940408		-0.0432873	0.204872	1.73554
39		0.600624	0.260847	-0.0516157		0.217043	0.670529	0.833961		-0.112182	0.17808	1.47725
39.25		0.422883	0.0384383	-0.0770647		0.187081	0.45717	0.648619		-0.113578	0.106249	1.11308
39.5		0.362936	0.109077	-0.083208		0.0571759	0.318072	0.437469		-0.0156718	0.115293	0.774478
39.75		0.254157	0.116114	-0.0498998		0.139477	0.11136	0.279662		-0.00675058	0.0266259	0.423982
40		0.231973	0.0442374	-0.0303811		0.0342501	-0.191677	0.0761919		0.0406018	0.0421662	0.0820284
40.25		0.0752849	0.0717264	-0.10047		-0.103198	-0.178937	-0.149214		0.00469888	-0.00249467	-0.23731
40.5		-0.00376801	-0.0133739	-0.0438636		-0.128623	-0.332653	-0.280295		-0.0266183	-0.123665	-0.467573
40.75		-0.0526787	0.0136871	-0.0412348		-0.0343656	-0.391954	-0.362026		0.0494228	-0.0932254	-0.517296
41		-0.158874	0.00011247	-0.0293703		-0.0570647	-0.347389	-0.349973		-0.0334469	-0.0653673	-0.617782
41.25		-0.20546	0.0171741	0.00152351		-0.0650371	-0.322905	-0.328955		0.0312062	-0.0853138	-0.671843
41.5		-0.189285	0.00886448	0.0145385		-0.000133773	-0.304337	-0.30826		0.060992	-0.10527	-0.751981
41.75		-0.256645	-0.0340595	-0.0358524		-0.0283075	-0.326004	-0.339085		0.0634984	-0.0855737	-0.663493
42		-0.182959	-0.0172212	-0.0141386		-0.0456324	-0.382888	-0.332502		-0.106625	-0.126681	-0.746684
42.25		-0.157302	-0.156788	-0.0327227		-0.0474077	-0.322508	-0.290049		0.000833498	-0.148024	-0.718257
42.5		-0.210136	-0.164178	-0.0493379		0.0260583	-0.180926	-0.180134		-0.066639	-0.0616091	-0.638069
42.75		-0.1607	-0.115803	0.0410882		0.12499	-0.138902	-0.0760978		-0.0415556	-0.0525999	-0.715311
43		-0.28267	-0.154384	-0.0750225		0.124152	7.41953e-05	-0.0184087		-0.0413724	-0.0782537	-0.659632
43.25		-0.36796	-0.14586	-0.0793685		0.0834718	-0.161723	-0.0992465		-0.0163706	-0.108826	-0.577666
43.5		-0.224067	-0.114864	-0.134656		0.0292788	-0.126103	-0.0905867		0.0115789	-0.0867964	-0.545264
43.75		-0.247665	-0.0619486	-0.103098		0.0160773	-0.154332	-0.148936		-0.0368391	-0.121023	-0.553933
44		-0.277526	0.0326045	-0.0465838		0.0650999	-0.0987265	-0.107638		-0.0418165	0.00541522	-0.508969
44.25		-0.3301	-0.197788	-0.151868		-0.0362207	-0.170769	-0.134976		-0.0237553	-0.0454617	-0.493467
44.5		-0.415373	-0.153151	-0.101138		-0.018137	-0.224429	-0.205641		-0.00383443	-0.0464724	-0.478102
44.75		-0.260125	-0.083426	-0.0157405		-0.00909343	-0.17731	-0.181319		-0.0304563	-0.0317565	-0.452671
45		-0.294354	-0.142187	-0.0787805		-0.0825672	-0.212952	-0.214614		0.0223336	-0.0157449	-0.364865
45.25		-0.219857	-0.053723	-0.0898984		-0.0281849	-0.165736	-0.13794		0.0317071	-0.0408669	-0.368995
45.5		-0.149067	-0.0760669	-0.0493868		-0.0976507	-0.181747	-0.164305		-0.071925	-0.176293	-0.43072
45.75		-0.143411	-0.0997346	-0.0531913		-0.0609338	-0.134189	-0.111297		0.084958	-0.022944	-0.354196
46		-0.0758575	-0.0631808	-0.0312477		-0.065658	-0.133432	-0.0314798		0.00171479	0.00343609	-0.282573
46.25		-0.244077	-0.146815	-0.0213725		-0.0362129	-0.206334	-0.0983989		-0.0476742	-0.117153	-0.3514
46.5		-0.227544	-0.103765	-0.106384		0.0175123	-0.124632	-0.0653214		-0.00674117	-0.0644768	-0.357386
46.75		-0.0937638	-0.103539	-0.0306263		0.000554286	-0.123431	-0.103622		-0.0189193	-0.077109	-0.38572
47		-0.119027	-0.0217577	-0.0140931		0.0110955	-0.167319	-0.123224		-0.0733575	-0.0340256	-0.371569
47.25		-0.0686682	-0.0719904	-0.00620057		-0.0402736	-0.0784386	-0.145624		-0.0700783	-0.142758	-0.365299
47.5		0.0190296	-0.0755163	-0.0061627		-0.0223053	0.227798	0.00335089		-0.0627606	0.071293	0.300851
47.75		0.215895	0.0873757	0.0915627		-0.0110201	0.708265	0.276911		-0.186258	0.14813	0.943257
48		0.351964	0.12379	0.349981		0.013801	0.924542	0.520628		0.0544011	0.275956	1.59876
48.25		0.458705	0.231798	0.715626		0.0845922	1.05227	0.856267		-0.0752152	0.166972	1.86262
48.5		0.589371	0.316918	0.988226		0.0808514	0.967736	0.932016		-0.00488595	0.251335	1.89721
48.75		0.538446	0.305164	0.86695		0.12907	0.852349	0.865858		0.0444843	0.177215	1.72943
49		0.4855	0.248593	0.83043		0.0827973	0.629438	0.692783		0.130314	0.294028	1.54299
49.25		0.331703	0.139749	0.577251		0.179856	0.465879	0.588796		0.1478	0.149208	1.20234
49.5		0.212415	0.00630207	0.450098		0.148372	0.347847	0.383387		0.182901	0.160611	0.88274
49.75		0.179984	0.0140721	0.374443		0.134429	0.0167344	0.240056		0.091111	0.149461	0.507866
50		0.116009	0.167227	0.303536		0.110279	0.039521	0.156396		0.0648652	0.0751852	0.161532
50.25		-0.0475677	0.14564	0.112467		0.0181574	-0.232848	0.000171814		0.074957	-0.0763925	-0.170146
50.5		-0.0527754	0.00340426	0.0329495		0.0506099	-0.326525	-0.197583		-0.0238314	-0.117917	-0.476223
50.75		-0.127814	-0.0382601	-0.176996		-0.0206284	-0.361518	-0.287403		-0.0227544	-0.0658938	-0.56595
51		-0.254667	-0.0451143	-0.189132		0.0244265	-0.386711	-0.250043		-0.0615373	-0.0993897	-0.616317
51.25		-0.268899	-0.058973	-0.219204		-0.109505	-0.357685	-0.336661		-0.0181253	-0.0509557	-0.6702
51.5		-0.201272	-0.0948864	-0.224204		-0.132929	-0.417041	-0.311645		-0.136572	-0.134547	-0.729913
51.75		-0.154741	0.0396916	-0.134554		-0.0904429	-0.458751	-0.359511		-0.024147	-0.0547881	-0.726757
52		-0.214902	-0.0770927	-0.165868		-0.0693931	-0.350341	-0.334988		-0.0421607	-0.0802756	-0.725608
52.25		-0.179159	-0.0247672	-0.113963		-0.0602959	-0.343368	-0.342464		-0.00570047	-0.119173	-0.700957
52.5		-0.191571	-0.104986	-0.177695		-0.0718757	-0.26604	-0.299905		0.0565157	-0.0831238	-0.641331
52.75		-0.147127	-0.0304126	-0.112916		-0.133693	-0.238845	-0.307089		0.0241217	-0.050726	-0.596503
53		-0.210772	-0.0952399	-0.225453		-0.123215	-0.277325	-0.293323		-0.0590425	-0.147841	-0.638137
53.25		-0.20993	-0.113135	-0.1964		-0.113204	-0.237569	-0.267252		0.0648685	-0.0423517	-0.549557
53.5		-0.247466	-0.0996379	-0.235729		0.0744301	-0.205553	-0.208642		0.054766	-0.0693031	-0.512444
53.75		-0.1469	0.00992239	-0.157015		-0.167386	-0.310692	-0.321234		-0.00194924	-0.0868495	-0.567868
54		-0.191534	-0.033392	-0.14058		-0.100936	-0.348573	-0.257952		-0.121323	-0.204092	-0.630562
54.25		-0.161064	-0.114896	-0.156391		-0.0364537	-0.264476	-0.241093		-0.0809017	-0.127771	-0.54369
54.5		-0.157297	-0.0554704	-0.216513		-0.0185059	-0.152163	-0.171501		0.00497557	-0.0839772	-0.506112
54.75		-0.159035	-0.143626	-0.211342		0.0618485	-0.0916776	-0.0942527		-0.071996	-0.0936841	-0.499188
55		-0.203288	-0.137993	-0.23228		-0.107151	-0.235385	-0.196261		-0.171385	-0.195269	-0.471957
55.25		-0.211528	-0.068357	-0.213925		-0.0754816	-0.164209	-0.13556		-0.0334099	-0.0821954	-0.477589
55.5		-0.0991153	-0.0769323	-0.163428		-0.0351192	-0.00755513	-0.0708835		0.0837332	-0.130543	-0.381651
55.75		-0.139125	-0.0486168	-0.17361		-0.0784748	-0.157976	-0.215497		0.036149	-0.0382879	-0.333384
56		-0.146954	-0.0135128	-0.153721		-0.00997911	-0.0785189	-0.186429		0.0614292	-0.0634116	-0.388547
56.25		-0.210821	-0.0141883	-0.139719		-0.14334	-0.113023	-0.144537		-0.0339297	-0.0604687	-0.357903
56.5		0.00167962	0.0622033	-0.0508198		-0.0321894	-0.0509862	-0.132544		-0.00170554	-0.0384502	-0.292939
56.75		-0.0532585	0.00687788	-0.104316		-0.0324301	-0.090797	-0.101385		0.0686772	0.0166626	-0.223092
57		-0.158205	-0.0925093	-0.114986		0.025641	-0.1314	-0.0712828		-0.0412293	-0.0559445	-0.335359
57.25		-0.0287027	0.0121862	-0.0788165		0.00823301	-0.0628689	-0.10711		0.152035	-0.0387617	-0.190349
57.5		0.0563074	-0.0230926	-0.120195		0.138544	0.273764	0.0469589		0.0466957	0.128847	0.413325
57.75		0.136182	0.0375517	-0.175267		-0.00591537	0.660134	0.241492		0.0142971	0.253832	1.11936
58		0.218522	0.159652	-0.124744		0.123052	1.04135	0.339085		-0.042456	0.205764	1.59363
58.25		0.406424	0.275701	-0.0255636		0.117733	1.02097	0.433102		-0.00985192	0.188559	1.87236
58.5		0.436965	0.207994	-0.102314		0.197143	1.06555	0.652631		0.0164309	0.300276	1.91318
58.75		0.413411	0.185161	-0.0505741		0.186121	0.838958	0.634117		-0.0594506	0.254298	1.69839
59		0.370116	0.12866	-0.127437		0.226819	0.662757	0.598134		0.0377266	0.251492	1.40326
59.25		0.23385	0.191884	-0.164902		0.0323948	0.371335	0.397343		-0.0603296	0.137019	1.02172
59.5		0.241225	0.165249	-0.1425		0.118503	0.311412	0.318202		-0.0838225	0.0695709	0.708226
59.75		0.123983	0.0737815	-0.17699		0.0280747	-0.0114551	0.161867		-0.0609537	0.0691932	0.370145
60		0.0703823	0.0799298	-0.0804137		0.0436656	-0.149762	0.0822374		-0.0556892	-0.0874596	-0.0301229
60.25		-0.0484907	-0.0282928	-0.119235		0.0563	-0.243254	0.0426727		-0.00690366	-0.0435251	-0.347606
60.5		-0.115334	-0.0690299	-0.168266		-0.00868629	-0.343291	-0.130408		0.0204293	-0.0513575	-0.493622
60.75		-0.201096	-0.13666	-0.158413		-0.0603096	-0.350227	-0.13749		-0.0319287	-0.0184347	-0.583684
61		-0.0580365	-0.087	-0.157455		-0.0444237	-0.340768	-0.180269		0.0844466	-0.0983007	-0.582629
61.25		-0.196017	-0.121893	-0.170099		-0.115254	-0.444643	-0.256839		0.0269478	-0.0628885	-0.66272
61.5		-0.188905	-0.12291	-0.101519		-0.0314962	-0.198917	-0.20213		-0.0286025	-0.135378	-0.683077
61.75		-0.277695	-0.0747733	-0.0349045		-0.0492742	-0.35846	-0.260866		-0.0347853	-0.0689136	-0.638453
62		-0.198668	-0.13641	-0.0676597		-0.201613	-0.296706	-0.195609		0.0502634	-0.126954	-0.622586
62.25		-0.211046	-0.134355	-0.0141276		-0.134399	-0.272529	-0.251511		0.0329644	-0.117934	-0.630627
62.5		-0.235564	-0.111049	0.0330765		-0.0622518	-0.292332	-0.209512		0.0028073	-0.046968	-0.618763
62.75		-0.118595	-0.0204562	0.0609252		0.0270885	-0.284604	-0.183034		0.0169289	-0.103857	-0.558451
63		-0.128342	0.0127934	0.0435529		-0.0152411	-0.331555	-0.282463		-0.0488754	-0.102997	-0.571114
63.25		-0.127802	0.0311518	0.0813184		0.0349933	-0.116642	-0.210615		-0.0765705	-0.0923918	-0.586142
63.5		-0.262753	-0.0143707	0.0236676		-0.000999395	-0.172557	-0.194494		-0.0622465	0.0271017	-0.552735
63.75		-0.264229	0.0532726	-0.00206757		0.0171526	-0.165354	-0.158547		-0.0633263	-0.118315	-0.592906
64		-0.182887	0.0241911	-0.0040982		0.105204	-0.185326	-0.148193		0.0442674	0.0356183	-0.525945
64.25		-0.219945	-0.0512289	-0.0489331		-0.0390993	-0.232422	-0.175879		-0.0190204	-0.00965535	-0.482108
64.5		-0.189124	-0.0643247	-0.0270472		-0.00714627	-0.25861	-0.186765		-0.0135618	0.0267763	-0.42929
64.75		-0.12593	-0.0019029	-0.114702		-0.0702362	-0.233043	-0.176857		-0.00290656	-0.0724954	-0.470355
65		-0.151844	-0.0227649	-0.0700731		-0.0249157	-0.188846	-0.123152		0.0210747	-0.00474711	-0.430039
65.25		-0.0870408	0.0118555	-0.0421091		-0.179372	-0.132202	-0.128329		0.0248322	-0.0471428	-0.401225
65.5		-0.0640161	-0.108765	-0.0147142		-0.0171681	-0.0942157	-0.0367052		0.00413561	-0.187245	-0.4905
65.75		-0.0587015	-0.0477358	0.0162839		0.0301815	-0.0877044	-0.0424452		0.0177118	-0.111638	-0.405836
66		-0.00678697	-0.0526487	0.0659381		-0.0442047	-0.223145	-0.110082		-0.0208315	-0.0181783	-0.421272
66.25		-0.0253606	0.0322198	0.0618815		-0.11361	-0.214463	-0.0793958		-0.0526154	-0.110664	-0.433838
66.5		-0.0286603	-0.117791	-0.0243867		0.00446266	-0.0265727	0.0035393		-0.0355864	-0.128882	-0.372825
66.75		-0.153228	-0.0146553	-0.0113488		0.00243786	-0.173324	-0.0394259		-0.0993645	-0.0749514	-0.33615
67		-0.132777	-0.0556696	-0.0563161		-0.112871	-0.163001	-0.101531		-0.0321664	-0.0484655	-0.351107
67.25		-0.0648037	-0.127535	-0.0254459		-0.107087	-0.179066	-0.0846102		-0.0653829	-0.011917	-0.294606
67.5		-0.00276701	0.00127564	-0.0613445		-0.0240894	0.144433	0.0780188		-0.05588	-0.045272	0.302387
67.75		0.147693	0.0836442	-0.0144161		0.0437046	0.681348	0.449085		0.0253116	0.0707286	0.982693
68		0.17053	0.161934	0.0288207		0.184966	0.981355	0.572176		0.0253468	0.208083	1.55103
68.25		0.303192	0.178125	0.043359		0.151229	1.01902	0.649837		0.0271459	0.16135	1.91422
68.5		0.468485	0.309306	0.112695		0.196232	1.09241	0.624456		0.0505906	0.253775	1.9533
68.75		0.352317	0.11831	-0.0334187		0.201212	0.805615	0.571283		0.0673256	0.203114	1.73892
69		0.519805	0.242291	0.0628112		0.189353	0.621154	0.364695		0.00539954	0.143292	1.42477
69.25		0.402322	0.156604	0.107318		0.0545706	0.463371	0.246153		0.0281305	0.166044	1.06885
69.5		0.260274	0.143733	-0.00504727		0.151618	0.181857	0.168818		-0.0209331	0.084978	0.692198
69.75		0.159279	0.0857658	-0.0529803		0.201556	0.000695374	0.120759		0.0172658	-0.0664259	0.32075
70		0.0468762	0.0205956	-0.0630838		0.162324	0.0159959	0.115941		-0.0698821	-0.0942931	-0.0246194
70.25		0.0207897	0.00996003	-0.0305257		0.125521	-0.167679	-0.0220265		0.0380101	-0.0826666	-0.240664
70.5		0.0365844	-0.0721188	-0.0294173		0.0524917	-0.298604	-0.122839		-0.0558808	-0.194102	-0.536217
70.75		-0.155717	-0.115164	-0.0567436		-0.0531239	-0.393923	-0.178841		-0.107844	-0.120504	-0.67228
71		-0.0916837	-0.0307485	-0.0109657		0.0313283	-0.318452	-0.194413		-0.118662	-0.0754839	-0.720694
71.25		-0.205472	-0.0940547	-0.0583905		-0.101175	-0.415868	-0.256397		-0.0261233	0.0208381	-0.683301
71.5		-0.104847	0.00800597	-0.00310897		-0.172649	-0.400789	-0.234073		0.0296563	0.0351688	-0.669256
71.75		-0.191079	-0.0460018	-0.0124598		-0.223226	-0.379815	-0.243868		0.0328144	0.0309834	-0.645771
72		-0.0961213	-0.063899	0.0549407		-0.22257	-0.306903	-0.203306		0.046968	-0.00168289	-0.641472
72.25		-0.173819	-0.0661744	-0.0473747		-0.243512	-0.324053	-0.275025		0.0338347	0.0222361	-0.614189
72.5		-0.225761	-0.0216108	0.00432025		-0.0739068	-0.309876	-0.145076		-0.0938833	0.00941781	-0.652037
72.75		-0.234872	-0.0375234	-0.0413256		-0.196149	-0.397434	-0.285211		0.0110923	-0.0363392	-0.618336
73		-0.165225	-0.0486115	-0.0841282		-0.0310154	-0.180879	-0.19067		0.0602274	-0.0107733	-0.542562
73.25		-0.132134	0.0378912	-0.0146706		-0.0519055	-0.260976	-0.176245		0.0791514	-0.0124258	-0.490127
73.5		-0.164543	-0.0657922	-0.00960376		-0.101655	-0.275182	-0.232607		0.0556955	-0.0826084	-0.506854
73.75		-0.159503	-0.0249913	-0.0367528		-0.132659	-0.244576	-0.201446		-0.0507851	-0.167157	-0.608339
74		-0.177865	-0.0382126	-0.0426287		-0.0273819	-0.18355	-0.123393		0.00470909	-0.0845175	-0.563317
74.25		-0.0294761	-0.0688503	0.0114467		0.0318371	-0.15726	-0.125477		0.0523503	-0.045414	-0.452179
74.5		-0.0724233	0.0474059	-0.00888214		-0.0109401	-0.148297	-0.0949513		-0.0181423	-0.035706	-0.452112
74.75		-0.0680468	0.0415625	0.010503		-0.0135846	-0.120173	-0.102571		-0.015798	-0.0743697	-0.409893
75		-0.0638469	-0.036557	-0.0508169		-0.0490066	-0.172593	-0.121563		0.106176	-0.0021199	-0.357026
75.25		-0.126767	0.0365362	0.0200374		-0.0804946	-0.102528	-0.108759		-0.0156644	-0.0790667	-0.328538
75.5		-0.0661685	-0.0105671	-0.0555925		-0.0539374	-0.163893	-0.0306009		0.0768042	-0.0207227	-0.276405
75.75		-0.0625615	-0.038449	0.0100467		-0.0813167	-0.162269	-0.110249		0.0459752	0.0221636	-0.249581
76		-0.0404559	-0.0132797	-0.0207455		-0.110698	-0.192587	-0.0498139		-0.0856877	-0.0798992	-0.354226
76.25		-0.0531224	-0.0160977	0.0444034		-0.243517	-0.35132	-0.251576		0.0571586	-0.0323437	-0.250986
76.5		-0.0560531	0.0270453	-0.0296774		-0.423075	-0.346839	-0.348157		0.146413	0.00610513	-0.232526
76.75		-0.153955	0.00971664	-0.0812547		-0.383385	-0.505306	-0.43593		0.0886823	0.0643712	-0.255454
77		-0.159028	-0.0212441	-0.00529118		-0.240391	-0.392874	-0.274807		0.107374	0.0493981	-0.126475
77.25		-0.118782	-0.0543866	-0.0390802		-0.318433	-0.359068	-0.318563		0.190278	0.118118	-0.0960818
77.5		0.024632	-0.0325381	-0.0262425		-0.250858	-0.0214436	-0.153202		0.129036	0.132822	0.452493
77.75		0.198666	0.120117	0.154186		-0.00444076	0.610938	0.268728		0.132014	0.243312	1.1615
78		0.215848	0.183648	0.493463		0.0994264	0.941063	0.590683		0.0134362	0.257901	1.66436
78.25		0.272742	0.215227	0.723491		0.13754	0.998171	0.837303		0.0636039	0.314441	1.96485
78.5		0.326228	0.20932	0.776397		0.225462	0.926143	0.88777		0.115816	0.360434	2.05887
78.75		0.358523	0.275505	0.743984		0.251565	0.914959	0.824315		0.104828	0.38253	1.82116
79		0.395647	0.313304	0.715306		0.3664	0.693658	0.689199		0.0887615	0.234326	1.4834
79.25		0.394732	0.140453	0.630084		0.274166	0.498445	0.552241		0.00388836	0.186127	1.0918
79.5		0.384631	0.0879137	0.476739		0.163563	0.331567	0.371603		0.0280979	0.0519219	0.701496
79.75		0.239697	-0.00172233	0.258122		0.178204	0.154067	0.226237		-0.0139728	0.0495557	0.382921
80		0.152763	0.104333	0.145162		0.0887589	-0.0339637	-0.00429745		-0.100761	-0.114956	-0.0310322
80.25		0.16912	0.0287817	0.109186		-0.0600876	-0.275238	-0.151938		0.0103475	-0.0194842	-0.289396
80.5		0.0277859	-0.00667026	-0.0925572		-0.0872048	-0.331141	-0.152652		-0.0165629	-0.0405104	-0.446283
80.75		0.0619259	0.0198764	-0.0498886		-0.017327	-0.364338	-0.177279		0.0661598	-0.0700985	-0.571265
81		-0.0902036	0.018606	-0.161467		-0.0928393	-0.366465	-0.210193		0.0279587	-0.102485	-0.647164
81.25		-0.0634678	-0.0220821	-0.115478		-0.00956694	-0.316962	-0.155052		0.0794602	-0.061407	-0.640048
81.5		-0.174347	0.0585631	-0.193182		0.0215221	-0.30846	-0.14345		0.0870689	0.0256268	-0.67294
81.75		-0.327976	-0.047632	-0.258732		-0.0675083	-0.282621	-0.194644		0.0456259	-0.00562915	-0.649249
82		-0.250332	-0.0298204	-0.16465		0.0747299	-0.133409	-0.099181		0.0208448	-0.0458839	-0.662834
82.25		-0.237607	-0.0249221	-0.21899		0.0957228	-0.156586	-0.134892		-0.0202181	-0.057509	-0.638937
82.5		-0.13834	-0.0557826	-0.202756		0.0626823	-0.185597	-0.17415		-0.0102899	-0.0119149	-0.637178
82.75		-0.0720619	-0.0489356	-0.202171		-0.0130329	-0.152923	-0.225269		0.0147639	-0.0697096	-0.566358
83		-0.0899215	-0.00851088	-0.128542		-0.03376	-0.189989	-0.231939		-0.0456224	-0.0487022	-0.540116
83.25		-0.209606	-0.0252621	-0.167967		-0.0576952	-0.282693	-0.28182		-0.0397932	-0.0358181	-0.579692
83.5		-0.109142	-0.0235444	-0.152539		-0.0958285	-0.275677	-0.351715		0.0506671	-0.00191295	-0.478207
83.75		-0.109497	-0.00872364	-0.151324		-0.0384944	-0.236192	-0.283455		0.0374331	-0.00474326	-0.487288
84		-0.110342	-0.0458475	-0.181288		-0.0501401	-0.178207	-0.21897		-0.0105421	-0.0332218	-0.41396
84.25		-0.0682856	0.0347998	-0.132857		-0.0239693	-0.231188	-0.181861		-0.0212429	-0.125789	-0.50181
84.5		-0.130307	-0.0507776	-0.17084		-0.0485832	-0.27147	-0.200793		0.0364372	-0.0565281	-0.42056
84.75		-0.12877	0.0800903	-0.057046		-0.0454054	-0.248586	-0.160947		-0.0072387	-0.0794329	-0.475785
85		-0.148409	-0.0245414	-0.128976		-0.119385	-0.203299	-0.200693		-0.116305	-0.175919	-0.505
85.25		0.0473682	0.0862022	-0.0203191		-0.110821	-0.125627	-0.119383		0.0441383	-0.0708471	-0.373995
85.5		-0.120323	0.0157747	-0.122158		-0.0547847	-0.16571	-0.0987581		-0.00785607	-0.0427166	-0.347494
85.75		-0.129634	-0.120483	-0.160703		-0.0573241	-0.139175	-0.121645		0.131232	0.00627738	-0.286763
86		-0.0489743	0.0738263	-0.024043		-0.0233051	-0.15016	-0.0968045		0.0157642	-0.0815856	-0.329643
86.25		-0.116244	-0.0520531	-0.126385		-0.104167	-0.183853	-0.117206		0.051726	-0.0888894	-0.331307
86.5		-0.19639	-0.0688763	-0.21635		-0.0359507	-0.222225	-0.155795		0.121292	-0.0223024	-0.342066
86.75		-0.182934	-0.103782	-0.223807		-0.0486557	-0.138397	-0.0907352		-0.0437395	-0.0585382	-0.298135
87		-0.146704	-0.0185594	-0.241071		-0.00324195	-0.0721755	-0.0726047		0.0988452	-0.0029814	-0.245748
87.25		-0.0411472	-0.0226816	-0.188727		0.0331256	-0.0141825	-0.0720388		0.0196569	-0.0114098	-0.24008
87.5		0.172731	0.11512	-0.124535		-0.0235322	0.141601	0.0103804		0.0123852	-0.0461805	0.358071
87.75		0.164825	0.189591	-0.117406		0.106618	0.777458	0.339039		-0.0332104	0.0966468	1.06666
88		0.263225	0.158375	-0.187218		0.258048	1.10887	0.737249		0.0478255	0.251114	1.5499
88.25		0.339486	0.195398	-0.135949		0.304496	1.12445	0.980077		-0.0687414	0.195828	1.92224
88.5		0.399935	0.202061	-0.134577		0.255026	1.00911	0.961779		0.0107206	0.236682	1.94015
88.75		0.484054	0.211901	-0.0731892		0.276715	0.879624	0.981096		0.0379984	0.200275	1.77035
89		0.435565	0.211534	-0.059169		0.149381	0.689198	0.678419		0.0131343	0.134533	1.43777
89.25		0.411684	0.301828	-0.0227336		0.104497	0.479809	0.542393		0.0714438	0.189448	1.13266
89.5		0.286839	0.197177	-0.0438259		0.249473	0.263028	0.47872		-0.098039	0.0298971	0.670364
89.75		0.157019	0.106024	-0.078189		-0.144969	-0.0256528	0.154001		0.0101887	0.117528	0.362877
90		0.0620407	0.130186	-0.0428006		-0.0158417	-0.16071	0.0580065		-0.0688078	0.0171225	-0.0439238
90.25		0.0472375	-0.0368377	-0.0221798		-0.0283089	-0.269949	-0.0510229		0.0250977	-0.0027656	-0.368968
90.5		0.0976548	0.124913	0.0731248		-0.036367	-0.255162	-0.0694048		-0.103863	-0.0627806	-0.553774
90.75		0.0467222	0.0135262	0.0306277		0.0871268	-0.328533	-0.0926396		-0.0118868	-0.0778044	-0.715839
91		-0.070443	-0.0678688	-0.0648447		0.0380436	-0.350279	-0.131495		-0.041638	-0.0965693	-0.733099
91.25		-0.0728414	0.0204897	0.0315875		0.165029	-0.255018	-0.0812921		-0.118645	-0.116788	-0.748574
91.5		-0.0849668	-0.101124	-0.024641		0.0962154	-0.286402	-0.109389		-0.0653984	-0.0996196	-0.758429
91.75		-0.00154593	0.071236	-0.0497328		0.0870449	-0.173872	-0.114303		-0.0930776	-0.0155357	-0.746898
92		-0.0519349	-0.000963497	0.00446134		0.146671	-0.130429	-0.135582		-0.0535535	-0.0921151	-0.685039
92.25		-0.126163	0.00672624	-0.0204427		0.0814326	-0.167512	-0.0930898		-0.0782165	-0.124451	-0.740611
92.5		-0.22237	-0.0671089	-0.131891		0.00835944	-0.15989	-0.0977001		0.0249719	0.00944811	-0.605804
92.75		-0.210858	-0.117869	-0.138935		0.102043	-0.140262	-0.142326		-0.00840799	-0.0318128	-0.581379
93		-0.179397	-0.085904	-0.121881		-0.146487	-0.268732	-0.252935		0.0475373	-0.0232237	-0.569408
93.25		-0.191192	-0.0683686	-0.151332		-0.093477	-0.126152	-0.212485		0.0970349	-0.0253967	-0.481149
93.5		-0.154539	-0.0526242	-0.110388		-0.0292044	-0.126083	-0.218782		0.0273386	-0.118874	-0.489601
93.75		-0.103404	0.0536315	-0.0319334		-0.0617721	-0.25121	-0.173084		-0.0317138	-0.0695005	-0.466312
94		-0.0508808	0.00266127	-0.0263002		0.00865269	-0.266324	-0.189678		0.0091324	0.053685	-0.365885
94.25		-0.228732	-0.0661844	-0.0714043		-0.00796212	-0.166439	-0.16336		-0.0335868	-0.151279	-0.469438
94.5		-0.224542	-0.0872343	-0.139815		-0.225783	-0.313158	-0.289708		0.0928208	0.0162776	-0.315655
94.75		-0.103401	0.0350154	-0.0156209		0.059944	-0.178222	-0.164004		0.0841841	-0.0373391	-0.435639
95		-0.115818	-0.068848	-0.0462724		-0.0244933	-0.131384	-0.137487		0.0559243	0.0320201	-0.361387
95.25		-0.21373	0.0106158	-0.0750742		-0.0334784	-0.13763	-0.123114		0.0725266	-0.0667632	-0.365308
95.5		-0.0637127	-0.0497406	-0.01777		-0.0996493	-0.197726	-0.181979		0.0111553	-0.00357064	-0.38248
95.75		-0.140055	0.0354415	0.0225115		-0.110547	-0.226496	-0.225949		0.0765673	0.0466694	-0.297331
96		-0.151183	0.00248507	-0.0544751		-0.0660818	-0.137608	-0.138765		0.0825424	0.0598342	-0.308262
96.25		-0.131843	0.0312335	-0.0365986		-0.115067	-0.148497	-0.177296		0.00724901	-0.0606748	-0.325343
96.5		-0.156028	0.0471717	-0.0234466		0.0166005	-0.089176	-0.0457226		0.0494778	0.0885746	-0.323323
96.75		-0.00391594	0.0252903	-0.018893		0.103903	0.068374	-0.0431963		-0.0303213	0.0565438	-0.317956
97		-0.0243517	-0.00241627	0.0126979		-0.00765887	-0.178567	-0.169786		-0.00801094	0.0230254	-0.317393
97.25		-0.000970993	-0.00321033	-0.0359894		-0.00674805	-0.128416	-0.149374		0.00339376	0.015959	-0.282071
97.5		0.204204	0.0989216	0.100406		0.0433319	0.262795	0.00132746		0.00473599	0.0866083	0.348286
97.75		0.243792	0.187964	0.301582		0.143468	0.700241	0.296999		-0.0790586	0.142253	1.05096
98		0.432109	0.148289	0.569528		0.201443	0.919241	0.567139		-0.0028548	0.193585	1.611
98.25		0.415039	0.207634	0.758047		0.156861	0.998959	0.692224		0.0583202	0.265392	1.97823
98.5		0.41528	0.233047	0.893566		0.282195	1.01518	0.698306		0.0896547	0.262343	2.02202
98.75		0.41387	0.0928785	0.75434		0.131964	0.908538	0.544764		0.0968416	0.225505	1.77281
99		0.496579	0.251625	0.76363		0.0472124	0.595893	0.360932		0.0150278	0.151793	1.47591
99.25		0.345862	0.0926501	0.5653		0.0291801	0.435684	0.265459		-0.0682586	0.0583205	1.09163
99.5		0.303627	0.168707	0.547463		-0.110862	0.0455051	0.06591		-0.030147	0.0229452	0.655404
99.75		0.361995	0.177398	0.521786		-0.0107059	-0.10766	-0.0657024		-0.10427	-0.00254446	0.278862
100		0.165511	0.123855	0.271449		-0.102846	-0.226322	-0.157977		-0.0194727	-0.0531451	-0.0263338
100.25		0.0972195	0.0513687	0.112956		-0.208644	-0.347043	-0.236634		-0.0369134	-0.116289	-0.341807
100.5		-0.0680477	0.00995849	-0.040689		-0.160071	-0.355171	-0.245225		-0.109469	-0.124436	-0.573573
100.75		-0.0865828	0.0762184	-0.117122		-0.166842	-0.550534	-0.315268		0.0510734	0.0430255	-0.587624
101		-0.105081	0.0390231	-0.141776		-0.0847709	-0.455849	-0.24479		0.0469009	0.0550595	-0.603105
101.25		-0.127398	0.0679	-0.195316		-0.157335	-0.480702	-0.276008		0.108453	0.0471017	-0.55674
101.5		-0.158172	-0.0581183	-0.24122		-0.163469	-0.411175	-0.293217		0.00601203	-0.0167633	-0.664526
101.75		-0.136224	-0.0546213	-0.235042		-0.210972	-0.318538	-0.264798		0.103219	0.0407614	-0.594022
102		-0.134777	-0.0194399	-0.262461		-0.140065	-0.30178	-0.186121		0.13291	0.102332	-0.534942
102.25		-0.172263	-0.0492246	-0.29775		-0.12732	-0.212075	-0.20811		0.0820244	0.0433113	-0.584124
102.5		-0.198175	-0.0598004	-0.196899		-0.0133666	-0.246325	-0.217787		0.0730932	-0.0252947	-0.536562
