# Supplementary material for: Corticothalamic gating of population auditory thalamocortical transmission in mouse
Source: eLife. 2021 May 24;10:e56645. doi: 10.7554/eLife.56645 (PMC8186908; doi:10.7554/eLife.56645)
Supplement: Figure 3—source data 2. [file elife-56645-fig3-data2.xlsx]

## Sheet: Figure 3D
% of population ON-responses
IC	MGB	Swm			% of population ON-responses	Standard error
60	100	100		IC	60	3.16228
50	100	100		MGB	100	0
70	100	100		Swm	100	0
60	100	100
60	100	100
