# Supplementary material for: Corticothalamic gating of population auditory thalamocortical transmission in mouse
Source: eLife. 2021 May 24;10:e56645. doi: 10.7554/eLife.56645 (PMC8186908; doi:10.7554/eLife.56645)
Supplement: Figure 3—source data 3. [file elife-56645-fig3-data3.xlsx]

## Sheet: Figure 3C
c	250 mA	Df/f			150 mA	Df/f			50 mA	Df/f
(s)	Stimulation	IC	MGB	AC	Stimulation	IC	MGB	AC	Stimulation	IC	MGB	AC
0.25		-0.45152	-0.39261	-0.3077		-0.139	-0.08441	-0.06126		-0.05553	-0.05553	-0.17697
0.5		-0.28274	-0.32433	-0.15334		-0.12426	-0.19928	-0.0841		-0.07966	-0.07966	-0.2441
0.75		-0.23379	-0.17951	-0.10577		0.00234	-0.05335	-0.06827		-0.14123	-0.14123	-0.20361
1		-0.17274	-0.26481	-0.06258		-0.08964	-0.11032	-0.0817		0.02154	0.02154	-0.10515
1.25		-0.22921	-0.34253	-0.1116		-0.02476	-0.13171	-0.04179		0.01076	0.01076	-0.06743
1.5		-0.25133	-0.17042	-0.10117		-0.06946	-0.16195	-0.11538		0.06439	0.06439	-0.09008
1.75		-0.08957	-0.16097	-0.08157		-0.05011	-0.14324	-0.15141		0.10175	0.10175	-0.05108
2		-0.08239	-0.14569	0.01393		-0.06888	-0.11608	-0.09369		0.06522	0.06522	-0.01881
2.25		-0.08522	-0.05429	0.0498		-0.11966	-0.07292	-0.09688		0.02521	0.02521	-0.03803
2.5		-0.1272	-0.14054	-0.05635		-0.07785	-0.12039	-0.0547		0.02626	0.02626	-0.0478
2.75		-0.10002	-0.08214	0.000962515		-0.06095	-0.1515	-0.16967		0.07859	0.07859	-0.00925
3		-0.05713	-0.10971	0.04064		-0.10752	-0.12349	-0.06881		0.12895	0.12895	0.05687
3.25		-0.05589	-0.03264	0.03335		-0.04352	-0.07631	-0.04281		0.18553	0.18553	0.07636
3.5		-0.04591	-0.04468	0.02215		-0.03731	-0.09418	-0.12089		0.05796	0.05796	0.03823
3.75		-0.03126	-0.14923	0.0029		0.10583	-0.0419	0.0127		0.1314	0.1314	0.06245
4		0.01891	-0.05663	0.000709402		0.12588	-0.04541	0.03076		0.14465	0.14465	-0.0041
4.25		-0.0156	-0.12233	0.00721		0.21683	0.06497	0.13668		0.11489	0.11489	-0.02466
4.5		-0.03314	-0.11536	0.00539		0.12776	0.03733	0.10808		0.02776	0.02776	0.04088
4.75		0.2334	0.16905	0.13764		0.18697	0.06274	0.10707		0.05568	0.05568	-0.00745
5		0.79958	0.6473	0.46287		0.55581	0.37803	0.39995		0.15432	0.15432	0.17686
5.25		1.42368	1.29472	0.81164		0.839	0.63511	0.70948		0.27054	0.27054	0.4479
5.5		2.07513	1.77978	1.06568		1.02361	1.01885	0.89073		0.33758	0.33758	0.71361
5.75		2.39969	2.12174	1.23058		1.25571	1.19204	1.21367		0.36365	0.36365	0.98502
6		2.63454	2.29698	1.44921		1.36025	1.41425	1.40395		0.37162	0.37162	1.22363
6.25		2.65275	2.38825	1.72599		1.36807	1.38492	1.58942		0.42433	0.42433	1.41137
6.5		2.65009	2.42073	1.80143		1.37185	1.5244	1.69533		0.34876	0.34876	1.47359
6.75		2.31867	2.19132	1.9263		1.36449	1.36373	1.64371		0.31679	0.31679	1.72043
7		2.06939	1.95961	1.88657		1.16514	1.22553	1.55991		0.32184	0.32184	1.93398
7.25		1.89272	1.72182	1.85249		1.03674	1.1536	1.36937		0.26988	0.26988	2.00659
7.5		1.65534	1.4096	1.71082		0.87062	1.07174	1.21533		0.29098	0.29098	2.05233
7.75		1.21028	1.07646	1.49372		0.77053	0.82618	0.99525		0.20686	0.20686	2.14199
8		0.94645	0.76993	1.20758		0.67855	0.79133	0.89149		0.10234	0.10234	2.04263
8.25		0.62054	0.4863	1.02373		0.52336	0.40829	0.74932		0.18472	0.18472	1.88024
8.5		0.35664	0.22204	0.81194		0.31284	0.37714	0.45501		0.07712	0.07712	1.58347
8.75		0.11152	-0.06698	0.54591		0.25223	0.22513	0.3693		0.15592	0.15592	1.37086
9		-0.16948	-0.29614	0.39558		0.00579	-0.00787	0.13375		0.07802	0.07802	1.12201
9.25		-0.47548	-0.48489	0.16005		-0.12853	-0.20997	-0.00135		0.01705	0.01705	0.86227
9.5		-0.59819	-0.80672	-0.0082		-0.14461	-0.21098	-0.13021		-0.02082	-0.02082	0.54781
9.75		-0.83051	-0.97647	-0.21163		-0.2497	-0.33891	-0.22431		-0.00151	-0.00151	0.36217
10		-1.03219	-1.1319	-0.36723		-0.37436	-0.53989	-0.4334		-0.10332	-0.10332	0.09688
10.25		-1.195	-1.41536	-0.5346		-0.47836	-0.63911	-0.50252		-0.1192	-0.1192	-0.1189
10.5		-1.30783	-1.48457	-0.63879		-0.56268	-0.75225	-0.6137		-0.12017	-0.12017	-0.28707
10.75		-1.43166	-1.5388	-0.80771		-0.57348	-0.8495	-0.70241		-0.06222	-0.06222	-0.46088
11		-1.43754	-1.61407	-0.93389		-0.57607	-0.94757	-0.74915		-0.19678	-0.19678	-0.64416
11.25		-1.58459	-1.82837	-1.13444		-0.63784	-0.97104	-0.80134		-0.20168	-0.20168	-0.75446
11.5		-1.51303	-1.73161	-1.11249		-0.59898	-0.89728	-0.82865		-0.10234	-0.10234	-0.86237
11.75		-1.48851	-1.74895	-1.10908		-0.72929	-0.86718	-0.81684		-0.22228	-0.22228	-0.97446
12		-1.38038	-1.69258	-1.17588		-0.69426	-0.95151	-0.80557		-0.11936	-0.11936	-1.09468
12.25		-1.34819	-1.66568	-1.13156		-0.69261	-0.94939	-0.82972		-0.1739	-0.1739	-1.14413
12.5		-1.33133	-1.42473	-1.01756		-0.5736	-0.84066	-0.77524		-0.06742	-0.06742	-1.05512
12.75		-1.37054	-1.4855	-1.09055		-0.74066	-1.04215	-0.84693		-0.21907	-0.21907	-1.16253
13		-1.3011	-1.49357	-1.05504		-0.64428	-0.89697	-0.83567		-0.14111	-0.14111	-1.1169
13.25		-1.22299	-1.36625	-0.9923		-0.56949	-0.78195	-0.71189		-0.23533	-0.23533	-1.11069
13.5		-1.13023	-1.33882	-0.9841		-0.51907	-0.66688	-0.67541		-0.2421	-0.2421	-1.11144
13.75		-0.99609	-1.22082	-0.90713		-0.50498	-0.77627	-0.57819		-0.09464	-0.09464	-1.05003
14		-1.03646	-1.09556	-0.87304		-0.4367	-0.58175	-0.54293		-0.24734	-0.24734	-1.02615
14.25		-1.0237	-1.07534	-0.78345		-0.39204	-0.64629	-0.52925		-0.21913	-0.21913	-1.07765
14.5		-0.82349	-1.01828	-0.76016		-0.41573	-0.51049	-0.52479		-0.23758	-0.23758	-0.90339
14.75		-0.59089	-0.73182	-0.67304		-0.17055	-0.27131	-0.42462		-0.1339	-0.1339	-0.89621
15		-0.20956	-0.24248	-0.35966		0.05857	-0.16296	-0.19404		-0.092	-0.092	-0.77745
15.25		0.2854	0.27371	-0.12856		0.20907	0.07378	0.12756		0.03098	0.03098	-0.43505
15.5		0.79071	0.7045	0.24695		0.52358	0.33729	0.43974		0.12341	0.12341	-0.1511
15.75		0.99671	0.90302	0.31703		0.74887	0.59097	0.65984		0.11649	0.11649	-0.05904
16		1.22963	1.21529	0.56393		0.74662	0.62411	0.83543		0.22075	0.22075	0.13853
16.25		1.42899	1.32476	0.81258		0.91112	0.92282	1.02935		0.2671	0.2671	0.13929
16.5		1.22183	1.33914	0.72491		0.87648	0.8126	1.06157		0.20299	0.20299	0.19832
16.75		1.21699	1.35022	0.79193		0.86059	0.9108	1.10989		0.26843	0.26843	0.19158
17		1.12091	1.24816	0.72333		0.85076	0.85719	1.02156		0.18373	0.18373	0.13491
17.25		1.04336	1.15511	0.60529		0.66224	0.64279	0.83382		0.23241	0.23241	0.16733
17.5		0.85413	1.07127	0.47064		0.67996	0.66836	0.73389		0.18008	0.18008	0.09774
17.75		0.78518	0.96972	0.44625		0.52758	0.52138	0.58763		0.21945	0.21945	-0.02596
18		0.60436	0.80845	0.26059		0.41119	0.39092	0.47491		0.11465	0.11465	-0.04806
18.25		0.36117	0.64452	0.17348		0.29798	0.401	0.27579		0.10423	0.10423	-0.11686
18.5		0.26821	0.47788	0.07717		0.13486	0.21071	0.12288		0.12104	0.12104	-0.10504
18.75		0.13633	0.32074	0.0108		0.12808	0.23956	0.08584		0.0916	0.0916	-0.13328
19		-0.01835	0.20439	-0.16605		-0.0324	0.04435	-0.05402		0.08119	0.08119	-0.20662
19.25		-0.09592	-0.03494	-0.24905		-0.08129	-0.0708	-0.17689		0.04945	0.04945	-0.28113
19.5		-0.29443	-0.00228	-0.34069		-0.14186	-0.2637	-0.35725		0.01686	0.01686	-0.2863
19.75		-0.41473	-0.29303	-0.38532		-0.22964	-0.2216	-0.39073		0.01709	0.01709	-0.32528
20		-0.45818	-0.36038	-0.48634		-0.26052	-0.30138	-0.42868		-0.11921	-0.11921	-0.44055
20.25		-0.67735	-0.44168	-0.54744		-0.34307	-0.28045	-0.45972		-0.10658	-0.10658	-0.47463
20.5		-0.65272	-0.48682	-0.57003		-0.55034	-0.46557	-0.59805		-0.06547	-0.06547	-0.42669
20.75		-0.77951	-0.65007	-0.63667		-0.46673	-0.52158	-0.61641		-0.0781	-0.0781	-0.46392
21		-0.82219	-0.67375	-0.6445		-0.44486	-0.44549	-0.59854		-0.16266	-0.16266	-0.48637
21.25		-0.69331	-0.54861	-0.56775		-0.45257	-0.46631	-0.61008		-0.18473	-0.18473	-0.54985
21.5		-0.83808	-0.60513	-0.59313		-0.51699	-0.52984	-0.66488		-0.16519	-0.16519	-0.52737
21.75		-0.86551	-0.78164	-0.62373		-0.43032	-0.4604	-0.57794		-0.18914	-0.18914	-0.50903
22		-0.81861	-0.70398	-0.61804		-0.48062	-0.57678	-0.55617		-0.19502	-0.19502	-0.41556
22.25		-0.76751	-0.64678	-0.55378		-0.50612	-0.45479	-0.59713		-0.1565	-0.1565	-0.44392
22.5		-0.79644	-0.67405	-0.52437		-0.52011	-0.56938	-0.58464		-0.22525	-0.22525	-0.43921
22.75		-0.84406	-0.70278	-0.49967		-0.43361	-0.49119	-0.51287		-0.27493	-0.27493	-0.40809
23		-0.74305	-0.58089	-0.50296		-0.50266	-0.50548	-0.52493		-0.25765	-0.25765	-0.46238
23.25		-0.70829	-0.60315	-0.40154		-0.42428	-0.47103	-0.49902		-0.13202	-0.13202	-0.38129
23.5		-0.77945	-0.59674	-0.48382		-0.4663	-0.44421	-0.45478		-0.18597	-0.18597	-0.34751
23.75		-0.72578	-0.62099	-0.4464		-0.4626	-0.45091	-0.47682		-0.06559	-0.06559	-0.25939
24		-0.72272	-0.53531	-0.36581		-0.42102	-0.45549	-0.44456		-0.09389	-0.09389	-0.23968
24.25		-0.69367	-0.58061	-0.34754		-0.33235	-0.30049	-0.34054		-0.06155	-0.06155	-0.24989
24.5		-0.70636	-0.6456	-0.34044		-0.23514	-0.08303	-0.10385		-0.07205	-0.07205	-0.20904
24.75		-0.41863	-0.32354	-0.30604		0.01321	0.0151	-0.03947		-0.01825	-0.01825	-0.17306
25		0.02536	0.10132	0.04175		0.27257	0.28005	0.15796		-0.02699	-0.02699	-0.0195
25.25		0.42135	0.47802	0.26777		0.41365	0.35638	0.33579		0.04774	0.04774	0.15501
25.5		0.80259	0.92877	0.57522		0.75993	0.71478	0.63272		0.20614	0.20614	0.40483
25.75		1.08485	1.1013	0.76217		0.8009	0.92468	0.86161		0.34396	0.34396	0.61626
26		1.22778	1.26873	0.91459		0.93893	0.95374	0.98624		0.34143	0.34143	0.74091
26.25		1.21113	1.37795	0.98433		0.86816	0.97585	1.04926		0.38757	0.38757	0.82339
26.5		1.24074	1.30975	1.06841		0.89938	0.91685	1.07148		0.25324	0.25324	0.76953
26.75		1.14361	1.35155	0.95928		0.94177	1.02483	1.05187		0.2497	0.2497	0.66209
27		1.04021	1.26482	0.95396		0.84698	0.8245	0.9286		0.21701	0.21701	0.61365
27.25		0.89023	1.09178	0.81295		0.77375	0.82679	0.78907		0.18699	0.18699	0.54604
27.5		0.8434	1.04474	0.67281		0.59921	0.73834	0.66424		0.23945	0.23945	0.47324
27.75		0.67991	0.92532	0.58223		0.60089	0.61393	0.53882		0.26035	0.26035	0.45432
28		0.55248	0.73269	0.47364		0.45298	0.53075	0.38728		0.19441	0.19441	0.26994
28.25		0.41688	0.6063	0.37612		0.3139	0.40793	0.28009		0.07523	0.07523	0.21386
28.5		0.21069	0.46786	0.19594		0.26898	0.3983	0.22857		0.12583	0.12583	0.18378
28.75		0.09461	0.34784	0.14653		0.09919	0.18531	0.13039		0.02429	0.02429	0.11171
29		-0.03337	0.0899	-0.000725172		-0.00886	0.13433	-0.02148		0.06731	0.06731	0.04419
29.25		-0.14509	0.11143	-0.01975		-0.01659	-0.05393	-0.01479		0.03749	0.03749	0.01465
29.5		-0.34997	-0.0721	-0.1709		-0.15818	-0.15048	-0.16691		-0.14718	-0.14718	-0.05745
29.75		-0.36236	-0.17799	-0.26289		-0.179	-0.1356	-0.18145		-0.01085	-0.01085	-0.09132
30		-0.50963	-0.33832	-0.31507		-0.33366	-0.28743	-0.32696		-0.19155	-0.19155	-0.23083
30.25		-0.70217	-0.50681	-0.48694		-0.34759	-0.21923	-0.36859		-0.1214	-0.1214	-0.20546
30.5		-0.83795	-0.52483	-0.49293		-0.39198	-0.31193	-0.37178		-0.20678	-0.20678	-0.26494
30.75		-0.68203	-0.60447	-0.49315		-0.4192	-0.42985	-0.40507		-0.11142	-0.11142	-0.28654
31		-0.7532	-0.67858	-0.53647		-0.40896	-0.40623	-0.46585		-0.20563	-0.20563	-0.30148
31.25		-0.79728	-0.70698	-0.52963		-0.48467	-0.5098	-0.46325		-0.19129	-0.19129	-0.33707
31.5		-0.84761	-0.70336	-0.54494		-0.64409	-0.52998	-0.50519		-0.08879	-0.08879	-0.2662
31.75		-0.7485	-0.65776	-0.44792		-0.60199	-0.51841	-0.50056		-0.17667	-0.17667	-0.26894
32		-0.85161	-0.7382	-0.50934		-0.43318	-0.38894	-0.38653		-0.11806	-0.11806	-0.24371
32.25		-0.82129	-0.66599	-0.48078		-0.46941	-0.43062	-0.44666		-0.14795	-0.14795	-0.20187
32.5		-0.74265	-0.64726	-0.45445		-0.51114	-0.44713	-0.37408		-0.09758	-0.09758	-0.13608
32.75		-0.81125	-0.64525	-0.44185		-0.53216	-0.50429	-0.39949		-0.23985	-0.23985	-0.19812
33		-0.77929	-0.61365	-0.41556		-0.50849	-0.42719	-0.41327		-0.15013	-0.15013	-0.19713
33.25		-0.72764	-0.63661	-0.38612		-0.59315	-0.56971	-0.45906		-0.1523	-0.1523	-0.1969
33.5		-0.78722	-0.60546	-0.38445		-0.55917	-0.588	-0.42658		-0.11968	-0.11968	-0.17191
33.75		-0.6854	-0.58943	-0.34843		-0.53759	-0.46113	-0.37902		-0.17058	-0.17058	-0.13272
34		-0.64387	-0.58892	-0.33661		-0.52228	-0.46931	-0.40055		-0.15108	-0.15108	-0.09635
34.25		-0.72787	-0.60437	-0.36848		-0.43071	-0.38116	-0.36226		-0.04887	-0.04887	-0.0895
34.5		-0.6091	-0.5539	-0.28067		-0.40358	-0.45047	-0.33026		-0.11163	-0.11163	-0.05986
34.75		-0.39369	-0.26498	-0.17202		-0.23352	-0.09648	-0.2746		-0.03948	-0.03948	-0.08144
35		-0.03287	0.02042	0.03424		-0.0941	-0.011	-0.06978		0.05957	0.05957	0.17905
35.25		0.49168	0.5486	0.36348		0.25476	0.22864	0.20083		0.13444	0.13444	0.3468
35.5		0.8138	0.73479	0.51896		0.50581	0.46787	0.46928		0.20889	0.20889	0.65917
35.75		0.97605	0.97432	0.62563		0.7198	0.66039	0.73982		0.17273	0.17273	0.77653
36		1.12085	1.08186	0.77396		0.68868	0.67691	0.83274		0.24449	0.24449	0.96452
36.25		1.13436	1.18665	0.79153		0.75924	0.75698	0.88508		0.34768	0.34768	0.99421
36.5		1.07052	1.14613	0.80918		0.78534	0.85465	0.92679		0.41816	0.41816	0.98429
36.75		1.10426	1.03261	0.74368		0.72215	0.78718	0.79824		0.30568	0.30568	0.89678
37		0.92096	1.07712	0.68284		0.6295	0.77716	0.7422		0.29773	0.29773	0.77195
37.25		0.81522	0.94776	0.63231		0.53998	0.77429	0.54461		0.21701	0.21701	0.65969
37.5		0.66559	0.76529	0.45854		0.47252	0.58469	0.45654		0.20694	0.20694	0.49701
37.75		0.5715	0.58604	0.38061		0.26593	0.49483	0.36092		0.23065	0.23065	0.46192
38		0.41539	0.46966	0.31361		0.35852	0.38653	0.30365		0.31799	0.31799	0.44256
38.25		0.35345	0.33845	0.24175		0.30421	0.38055	0.25642		0.01448	0.01448	0.34066
38.5		0.15755	0.25554	0.09437		0.14317	0.2878	0.20134		0.04628	0.04628	0.24314
38.75		0.09099	0.11286	0.02022		-0.01859	0.17993	0.08764		0.07293	0.07293	0.17266
39		-0.17109	0.0175	-0.04757		-0.00438	0.09997	0.08099		-0.02324	-0.02324	0.0708
39.25		-0.11004	-0.07542	-0.05353		-0.00538	0.00534	-0.0204		-0.02476	-0.02476	-0.07842
39.5		-0.23337	-0.18724	-0.14686		-0.06379	0.02084	-0.02154		-0.03375	-0.03375	-0.08702
39.75		-0.42613	-0.31746	-0.2304		-0.15786	-0.16494	-0.14058		-0.101	-0.101	-0.18395
40		-0.55738	-0.39454	-0.29153		-0.1768	-0.1507	-0.20214		-0.04466	-0.04466	-0.23919
40.25		-0.63668	-0.59067	-0.459		-0.30832	-0.21798	-0.20841		-0.13306	-0.13306	-0.25845
40.5		-0.70801	-0.64144	-0.44669		-0.37053	-0.32346	-0.24012		-0.07673	-0.07673	-0.29313
40.75		-0.75774	-0.63112	-0.45847		-0.41794	-0.32688	-0.28186		-0.15986	-0.15986	-0.39454
41		-0.84826	-0.67972	-0.47248		-0.44012	-0.40485	-0.36084		-0.18112	-0.18112	-0.39073
41.25		-0.82671	-0.78662	-0.50335		-0.41945	-0.46508	-0.36379		-0.11141	-0.11141	-0.34922
41.5		-0.84346	-0.76577	-0.53652		-0.42737	-0.39521	-0.32743		-0.20325	-0.20325	-0.29676
41.75		-0.86383	-0.70492	-0.45766		-0.4336	-0.31004	-0.24829		-0.15305	-0.15305	-0.3571
42		-0.83354	-0.71862	-0.40417		-0.42166	-0.3337	-0.26887		-0.19303	-0.19303	-0.3366
42.25		-0.7617	-0.55957	-0.32687		-0.34529	-0.36988	-0.21844		-0.14237	-0.14237	-0.29005
42.5		-0.86692	-0.69612	-0.4684		-0.23612	-0.31687	-0.14958		-0.13676	-0.13676	-0.31716
42.75		-0.81227	-0.73553	-0.36231		-0.31451	-0.26013	-0.09407		-0.13081	-0.13081	-0.2882
43		-0.79201	-0.58506	-0.34278		-0.22232	-0.26775	-0.08655		-0.19553	-0.19553	-0.29932
43.25		-0.74732	-0.58201	-0.30439		-0.31987	-0.34512	-0.13963		-0.01104	-0.01104	-0.19861
43.5		-0.67532	-0.50026	-0.32969		-0.319	-0.32659	-0.15324		-0.19874	-0.19874	-0.19895
43.75		-0.66799	-0.56281	-0.36507		-0.47157	-0.37527	-0.2655		-0.07758	-0.07758	-0.17727
44		-0.68682	-0.61614	-0.25319		-0.43703	-0.43867	-0.23573		-0.05667	-0.05667	-0.17183
44.25		-0.64572	-0.5671	-0.23686		-0.45308	-0.31572	-0.17034		0.0114	0.0114	-0.14024
44.5		-0.59706	-0.57563	-0.22025		-0.38125	-0.38288	-0.19156		-0.1555	-0.1555	-0.15491
44.75		-0.35232	-0.22908	-0.11664		-0.28098	-0.16975	-0.148		-0.01875	-0.01875	-0.08014
45		0.00577	0.01036	0.00979		0.08358	0.08097	0.06494		0.03974	0.03974	0.07264
45.25		0.32542	0.33493	0.26144		0.27141	0.20206	0.24141		0.10385	0.10385	0.26592
45.5		0.71856	0.64275	0.47993		0.58771	0.45419	0.51139		0.17345	0.17345	0.47288
45.75		0.9656	0.73057	0.61742		0.68422	0.64476	0.71928		0.26346	0.26346	0.59222
46		1.00019	0.96219	0.72615		0.77236	0.63897	0.8129		0.18748	0.18748	0.60803
46.25		1.06405	0.89831	0.73116		0.74391	0.66099	0.87239		0.19639	0.19639	0.69893
46.5		0.95792	0.90104	0.75901		0.81353	0.75364	0.82308		0.25713	0.25713	0.73817
46.75		0.83569	0.89209	0.67035		0.6571	0.82557	0.7016		0.18068	0.18068	0.64527
47		0.71331	0.71535	0.56985		0.58249	0.66104	0.60942		0.28568	0.28568	0.68154
47.25		0.62932	0.69777	0.47211		0.64195	0.6541	0.61688		0.37281	0.37281	0.58087
47.5		0.5435	0.50881	0.37388		0.41818	0.55891	0.45702		0.26366	0.26366	0.52653
47.75		0.48306	0.48388	0.35638		0.35013	0.43896	0.34183		0.1141	0.1141	0.42085
48		0.33563	0.28186	0.21447		0.30176	0.4124	0.27876		0.13813	0.13813	0.28087
48.25		0.0807	0.09113	0.08491		0.34306	0.38862	0.26955		0.15958	0.15958	0.25351
48.5		0.06381	0.05357	0.02295		0.2104	0.27719	0.17142		0.15435	0.15435	0.19382
48.75		-0.1087	-0.10301	-0.09301		0.1544	0.2616	0.10566		0.08797	0.08797	0.10619
49		-0.24418	-0.10739	-0.11312		0.06997	0.08402	-0.01293		-0.0429	-0.0429	-0.03166
49.25		-0.31272	-0.30604	-0.22027		0.01455	0.13409	0.05369		0.02211	0.02211	-0.07689
49.5		-0.37512	-0.32997	-0.1761		-0.12384	-0.07867	-0.07699		0.04089	0.04089	-0.11411
49.75		-0.51933	-0.50485	-0.37067		-0.21207	-0.11476	-0.18895		-0.03533	-0.03533	-0.17254
50		-0.79329	-0.65785	-0.41334		-0.32207	-0.11611	-0.22738		-0.01573	-0.01573	-0.24305
50.25		-0.74138	-0.65094	-0.44698		-0.30898	-0.28484	-0.24624		-0.10827	-0.10827	-0.26704
50.5		-0.87518	-0.78903	-0.51095		-0.35194	-0.34926	-0.35246		-0.16028	-0.16028	-0.33301
50.75		-0.79646	-0.78304	-0.45794		-0.48717	-0.43941	-0.42052		-0.03315	-0.03315	-0.30103
51		-0.80948	-0.79192	-0.44607		-0.58846	-0.53786	-0.46734		-0.13589	-0.13589	-0.34433
51.25		-0.78554	-0.68685	-0.37766		-0.49115	-0.45429	-0.39036		-0.17827	-0.17827	-0.3685
51.5		-0.91244	-0.71149	-0.47387		-0.45506	-0.42772	-0.39245		-0.09997	-0.09997	-0.36652
51.75		-0.85824	-0.7182	-0.41268		-0.4615	-0.46845	-0.37236		-0.13916	-0.13916	-0.28372
52		-0.81701	-0.67132	-0.39906		-0.49232	-0.39828	-0.30059		-0.11561	-0.11561	-0.33026
52.25		-0.69431	-0.67326	-0.33985		-0.54369	-0.48927	-0.38184		-0.16957	-0.16957	-0.30625
52.5		-0.75522	-0.6689	-0.36167		-0.5983	-0.49068	-0.32221		-0.06197	-0.06197	-0.25318
52.75		-0.76004	-0.60546	-0.32264		-0.47342	-0.45171	-0.28177		-0.09491	-0.09491	-0.31029
53		-0.58554	-0.59089	-0.26847		-0.44913	-0.38486	-0.28625		-0.16711	-0.16711	-0.21442
53.25		-0.73769	-0.66065	-0.3331		-0.50053	-0.4071	-0.28142		-0.11665	-0.11665	-0.21456
53.5		-0.68852	-0.58109	-0.26156		-0.44984	-0.41047	-0.27099		-0.10363	-0.10363	-0.23438
53.75		-0.658	-0.49906	-0.30963		-0.26302	-0.3261	-0.23693		-0.06969	-0.06969	-0.15807
54		-0.59531	-0.62269	-0.2884		-0.18916	-0.10959	-0.07613		-0.18293	-0.18293	-0.22961
54.25		-0.6339	-0.59962	-0.28529		-0.24387	-0.24549	-0.10564		-0.10356	-0.10356	-0.22774
54.5		-0.60163	-0.55645	-0.28504		-0.24277	-0.30094	-0.10675		-0.09018	-0.09018	-0.19264
54.75		-0.46188	-0.38396	-0.2587		-0.03109	-0.056	-0.03877		-0.03732	-0.03732	-0.11956
55		-0.01425	0.06841	0.01966		-0.06686	0.01634	-0.04346		0.05023	0.05023	-0.03616
55.25		0.37862	0.32794	0.26482		0.2565	0.34037	0.27011		0.09253	0.09253	0.13211
55.5		0.58762	0.47737	0.49352		0.52582	0.51537	0.54061		0.22695	0.22695	0.38195
55.75		0.83792	0.68605	0.60909		0.67519	0.58245	0.71125		0.24463	0.24463	0.55277
56		0.85515	0.78832	0.76908		0.72118	0.69482	0.86195		0.25766	0.25766	0.71161
56.25		0.92367	0.87621	0.75019		0.70826	0.71215	0.87275		0.15705	0.15705	0.81446
56.5		0.9056	0.84147	0.7329		0.72901	0.66431	0.90849		0.10084	0.10084	0.85227
56.75		0.77613	0.68525	0.56489		0.6	0.7011	0.77502		0.10778	0.10778	0.89951
57		0.60652	0.56362	0.48414		0.61374	0.59584	0.72691		0.1984	0.1984	0.99904
57.25		0.55131	0.48365	0.28106		0.55836	0.60424	0.62288		0.3117	0.3117	1.08236
57.5		0.40995	0.31074	0.24658		0.44508	0.46984	0.50183		0.28928	0.28928	0.99734
57.75		0.17478	0.23841	0.11673		0.29006	0.36382	0.39746		0.24862	0.24862	0.88232
58		0.20115	0.26382	0.09915		0.28417	0.3054	0.28874		0.10297	0.10297	0.59299
58.25		0.07323	0.09611	0.02705		0.13669	0.26758	0.23489		0.18511	0.18511	0.53237
58.5		-0.0933	-0.08941	-0.09989		0.1572	0.27894	0.19198		0.07024	0.07024	0.44963
58.75		-0.07184	-0.04702	-0.01397		-0.01041	0.08492	0.00917		0.0684	0.0684	0.32873
59		-0.2168	-0.20515	-0.13932		-0.11656	-0.11337	-0.0455		0.05151	0.05151	0.24455
59.25		-0.36168	-0.32842	-0.16514		-0.11684	-0.05692	-0.07518		0.01701	0.01701	0.03639
59.5		-0.45026	-0.37946	-0.28144		-0.196	-0.07632	-0.1669		-0.057	-0.057	0.05346
59.75		-0.56614	-0.51982	-0.31668		-0.28686	-0.20967	-0.25449		-0.05153	-0.05153	-0.07291
60		-0.59699	-0.54953	-0.35971		-0.25199	-0.25502	-0.22772		-0.04404	-0.04404	-0.22129
60.25		-0.69796	-0.64682	-0.41356		-0.43872	-0.29154	-0.32591		-0.11425	-0.11425	-0.28969
60.5		-0.75445	-0.70822	-0.45185		-0.37217	-0.35679	-0.40731		-0.11502	-0.11502	-0.3191
60.75		-0.76953	-0.70146	-0.45552		-0.52025	-0.54304	-0.46971		-0.11613	-0.11613	-0.4037
61		-0.80129	-0.67945	-0.44545		-0.4492	-0.37762	-0.38948		-0.07504	-0.07504	-0.39188
61.25		-0.73895	-0.657	-0.38485		-0.49401	-0.49915	-0.46836		-0.09368	-0.09368	-0.44579
61.5		-0.77772	-0.71342	-0.42578		-0.51994	-0.59778	-0.52875		-0.16052	-0.16052	-0.52178
61.75		-0.80109	-0.7115	-0.3667		-0.51704	-0.50447	-0.44975		-0.16594	-0.16594	-0.56631
62		-0.72387	-0.69386	-0.32174		-0.34329	-0.37712	-0.2958		-0.2614	-0.2614	-0.55527
62.25		-0.67247	-0.5568	-0.32767		-0.32573	-0.40257	-0.26703		-0.15514	-0.15514	-0.50727
62.5		-0.72401	-0.6709	-0.39626		-0.30394	-0.42137	-0.29643		-0.21579	-0.21579	-0.53497
62.75		-0.6848	-0.55584	-0.39638		-0.26481	-0.38759	-0.2524		-0.21689	-0.21689	-0.4918
63		-0.69767	-0.65041	-0.34945		-0.31355	-0.32499	-0.26065		-0.14883	-0.14883	-0.47095
63.25		-0.75681	-0.68321	-0.44309		-0.31033	-0.34214	-0.24923		-0.12838	-0.12838	-0.42956
63.5		-0.74864	-0.61234	-0.37445		-0.42684	-0.41118	-0.35497		-0.17026	-0.17026	-0.4286
63.75		-0.77832	-0.72691	-0.37876		-0.44937	-0.45124	-0.25962		-0.12364	-0.12364	-0.42382
64		-0.62723	-0.53796	-0.2868		-0.47934	-0.36775	-0.33374		-0.1546	-0.1546	-0.40874
64.25		-0.59692	-0.54032	-0.30283		-0.37486	-0.47847	-0.34237		-0.11147	-0.11147	-0.35952
64.5		-0.59702	-0.46842	-0.27037		-0.37972	-0.32127	-0.31746		-0.12584	-0.12584	-0.2723
64.75		-0.27714	-0.26141	-0.20523		-0.1863	-0.17821	-0.19213		-0.10029	-0.10029	-0.28546
65		0.01478	-0.02998	-0.04197		-0.09524	-0.08777	-0.08214		0.04283	0.04283	-0.25945
65.25		0.39806	0.14188	0.20922		0.25186	0.26721	0.12641		0.09442	0.09442	-0.15383
65.5		0.56907	0.48851	0.44825		0.50054	0.4215	0.3603		0.17039	0.17039	-0.08312
65.75		0.78479	0.62931	0.5617		0.64757	0.57257	0.55803		0.25315	0.25315	0.01401
66		0.85783	0.72165	0.68888		0.64775	0.59605	0.6225		0.24122	0.24122	0.01971
66.25		0.89174	0.76731	0.72857		0.56089	0.63619	0.58622		0.22794	0.22794	-0.04454
66.5		0.827	0.73015	0.67827		0.65541	0.68548	0.58816		0.29461	0.29461	-0.03091
66.75		0.66189	0.70068	0.59431		0.57848	0.66277	0.51096		0.27653	0.27653	-0.00234
67		0.60341	0.4809	0.47881		0.50726	0.68686	0.41554		0.30314	0.30314	-0.03864
67.25		0.48113	0.43781	0.35517		0.40305	0.52006	0.31404		0.21618	0.21618	-0.01676
67.5		0.44132	0.41508	0.38179		0.34284	0.48338	0.31868		0.11672	0.11672	-0.09278
67.75		0.30996	0.31205	0.24555		0.38964	0.3954	0.26152		-0.00416	-0.00416	-0.21767
68		0.21594	0.2337	0.19081		0.24855	0.2558	0.12202		-0.06573	-0.06573	-0.23998
68.25		0.23372	0.19545	0.15829		0.13671	0.27085	-0.00588		-0.00704	-0.00704	-0.17611
68.5		0.06273	0.02909	0.02648		-0.01059	0.06191	-0.0096		-0.06867	-0.06867	-0.21767
68.75		-0.03202	-0.11886	-0.07922		-0.01234	0.04167	-0.09899		-0.12471	-0.12471	-0.24269
69		-0.1761	-0.0094	-0.03659		-0.15864	-0.04819	-0.14534		-0.21632	-0.21632	-0.34237
69.25		-0.25488	-0.19165	-0.13842		-0.1708	-0.1207	-0.16068		-0.14047	-0.14047	-0.2565
69.5		-0.40598	-0.32531	-0.22605		-0.28263	-0.20034	-0.26829		-0.19144	-0.19144	-0.21148
69.75		-0.45454	-0.52549	-0.28202		-0.37753	-0.30846	-0.26583		-0.09263	-0.09263	-0.29466
70		-0.58346	-0.56724	-0.36271		-0.20337	-0.21813	-0.17618		-0.27689	-0.27689	-0.29704
70.25		-0.64875	-0.57776	-0.38963		-0.27737	-0.26272	-0.14654		-0.20785	-0.20785	-0.18013
70.5		-0.61686	-0.6842	-0.38879		-0.30121	-0.2678	-0.22192		-0.07432	-0.07432	-0.1026
70.75		-0.65463	-0.67442	-0.42444		-0.35842	-0.3565	-0.25615		-0.09584	-0.09584	-0.18037
71		-0.61711	-0.65311	-0.3649		-0.29176	-0.34848	-0.24357		-0.14472	-0.14472	-0.14802
71.25		-0.70465	-0.62493	-0.45423		-0.31363	-0.31859	-0.26421		-0.14567	-0.14567	-0.1446
71.5		-0.71594	-0.60036	-0.42488		-0.29043	-0.35231	-0.21315		-0.09661	-0.09661	-0.11287
71.75		-0.65907	-0.67571	-0.4161		-0.54022	-0.48658	-0.36832		-0.12462	-0.12462	-0.16982
72		-0.74427	-0.70619	-0.40048		-0.54954	-0.56743	-0.39608		-0.30312	-0.30312	-0.25586
72.25		-0.77455	-0.70745	-0.46622		-0.59746	-0.6149	-0.43952		-0.24416	-0.24416	-0.21426
72.5		-0.69794	-0.72714	-0.42066		-0.49673	-0.49433	-0.38107		-0.20934	-0.20934	-0.1647
72.75		-0.64957	-0.56366	-0.31558		-0.54027	-0.45121	-0.33087		-0.17868	-0.17868	-0.16231
73		-0.71283	-0.76297	-0.41929		-0.23418	-0.35972	-0.02361		-0.17314	-0.17314	-0.12378
73.25		-0.62047	-0.66922	-0.36614		-0.23092	-0.27155	-0.11583		-0.22174	-0.22174	-0.25009
73.5		-0.73694	-0.6969	-0.41748		-0.20484	-0.26381	-0.12025		-0.23625	-0.23625	-0.23432
73.75		-0.66613	-0.63753	-0.36525		-0.22188	-0.20332	-0.09541		-0.06314	-0.06314	-0.12835
74		-0.64553	-0.59589	-0.39717		-0.37272	-0.30515	-0.18979		-0.21794	-0.21794	-0.14797
74.25		-0.68729	-0.58005	-0.32517		-0.23759	-0.27072	-0.23855		-0.10906	-0.10906	-0.08094
74.5		-0.61966	-0.70358	-0.42097		-0.27857	-0.34666	-0.18158		-0.1279	-0.1279	-0.1183
74.75		-0.36469	-0.46687	-0.30121		-0.12397	-0.22732	-0.12142		0.09069	0.09069	-0.05033
75		-0.07956	-0.10128	-0.14088		0.06416	0.02218	-0.01973		0.04046	0.04046	-0.10335
75.25		0.2644	0.16816	0.10126		0.3095	0.26381	0.10345		0.0698	0.0698	-0.08111
75.5		0.57785	0.397	0.42928		0.47098	0.48095	0.32506		0.16941	0.16941	-0.01992
75.75		0.7074	0.54037	0.59386		0.57133	0.59877	0.56613		0.23976	0.23976	-0.03271
76		0.8076	0.72154	0.7094		0.64697	0.57836	0.68592		0.34104	0.34104	0.10066
76.25		0.68784	0.66672	0.73562		0.7393	0.76933	0.91897		0.24692	0.24692	-0.06535
76.5		0.75875	0.66297	0.71576		0.68133	0.65845	0.95294		0.18905	0.18905	0.00509
76.75		0.70357	0.60924	0.63055		0.67608	0.67787	0.9388		0.25362	0.25362	0.01446
77		0.58175	0.60322	0.55746		0.56664	0.56809	0.82295		0.19262	0.19262	-0.00843
77.25		0.42953	0.40004	0.38041		0.44987	0.58355	0.72846		0.16982	0.16982	-0.02984
77.5		0.39297	0.39858	0.37202		0.39415	0.38742	0.60193		0.19412	0.19412	-0.02541
77.75		0.28586	0.24419	0.30565		0.44772	0.46908	0.59112		0.12452	0.12452	-0.04237
78		0.2114	0.18818	0.21687		0.38822	0.42596	0.50912		0.07913	0.07913	-0.02782
78.25		0.16895	0.09218	0.18526		0.1614	0.23467	0.39765		0.0817	0.0817	-0.01705
78.5		0.05266	0.06131	0.11279		0.10007	0.19329	0.29514		0.05604	0.05604	0.00266
78.75		-0.11637	-0.15593	-0.02167		0.10888	0.11782	0.20187		0.00529	0.00529	-0.07524
79		-0.22398	-0.2827	-0.18019		0.02881	0.00707	0.10638		0.01668	0.01668	-0.03925
79.25		-0.40795	-0.31771	-0.23712		-0.08245	-0.04683	0.04231		-0.12624	-0.12624	-0.12587
79.5		-0.52106	-0.34214	-0.26142		-0.15404	-0.1389	-0.08706		-0.13008	-0.13008	-0.07437
79.75		-0.44868	-0.48443	-0.29472		-0.26705	-0.14541	-0.10842		-0.17765	-0.17765	-0.15339
80		-0.63196	-0.5457	-0.395		-0.33236	-0.27994	-0.22896		-0.07577	-0.07577	-0.03986
80.25		-0.65167	-0.52651	-0.4408		-0.34754	-0.37523	-0.31337		-0.10652	-0.10652	-0.04287
80.5		-0.72584	-0.8118	-0.50834		-0.38483	-0.38755	-0.2553		-0.14623	-0.14623	-0.07135
80.75		-0.71862	-0.72615	-0.55061		-0.446	-0.36879	-0.39759		-0.08353	-0.08353	-0.02531
81		-0.72399	-0.60905	-0.49263		-0.49212	-0.46671	-0.4268		-0.20015	-0.20015	-0.02456
81.25		-0.68213	-0.74951	-0.48677		-0.47436	-0.405	-0.46804		-0.08073	-0.08073	0.01311
81.5		-0.68636	-0.65204	-0.49696		-0.43439	-0.41517	-0.42945		-0.04577	-0.04577	-0.02234
81.75		-0.63412	-0.56283	-0.46738		-0.4186	-0.44361	-0.39743		-0.13677	-0.13677	-0.08018
82		-0.64839	-0.78181	-0.48243		-0.43297	-0.53378	-0.41043		-0.11616	-0.11616	-0.07677
82.25		-0.64935	-0.64206	-0.49428		-0.38998	-0.45965	-0.36686		-0.14429	-0.14429	0.00249
82.5		-0.63984	-0.63601	-0.45283		-0.304	-0.39222	-0.36149		-0.10056	-0.10056	-0.04749
82.75		-0.6371	-0.55819	-0.386		-0.36754	-0.33531	-0.39972		-0.21129	-0.21129	-0.09178
83		-0.69735	-0.7307	-0.45171		-0.41121	-0.38875	-0.43418		-0.13316	-0.13316	-0.0335
83.25		-0.60451	-0.60253	-0.40257		-0.3657	-0.4109	-0.34585		-0.02602	-0.02602	0.00774
83.5		-0.60093	-0.56764	-0.38463		-0.3722	-0.39116	-0.36903		-0.26336	-0.26336	-0.02938
83.75		-0.59177	-0.5698	-0.40035		-0.48744	-0.44366	-0.38179		-0.12892	-0.12892	-0.02767
84		-0.45322	-0.52514	-0.29584		-0.38247	-0.4277	-0.3484		-0.15449	-0.15449	-0.0736
84.25		-0.45691	-0.52605	-0.31412		-0.44134	-0.34955	-0.33216		-0.09632	-0.09632	0.00815
84.5		-0.48538	-0.50038	-0.31653		-0.36179	-0.35756	-0.34942		-0.05787	-0.05787	-0.00603
84.75		-0.2959	-0.287	-0.25162		-0.11384	-0.11475	-0.22141		-0.09212	-0.09212	-0.02868
85		-0.01305	-0.07857	-0.007		0.01384	-0.04804	-0.18722		0.01808	0.01808	0.18472
85.25		0.31669	0.20173	0.21307		0.22231	0.20399	-0.02466		0.12965	0.12965	0.45797
85.5		0.56973	0.40237	0.37243		0.46374	0.3692	0.20568		0.11257	0.11257	0.49667
85.75		0.83538	0.49532	0.54581		0.58436	0.50943	0.46696		0.14109	0.14109	0.74936
86		0.86977	0.72293	0.71566		0.63805	0.55549	0.58222		0.18012	0.18012	0.89037
86.25		0.81613	0.67026	0.72167		0.6386	0.56417	0.69648		0.17162	0.17162	0.91895
86.5		0.77089	0.67266	0.65334		0.5468	0.52528	0.76855		0.23649	0.23649	1.00531
86.75		0.73561	0.66221	0.62832		0.51416	0.57849	0.65091		0.17566	0.17566	0.91309
87		0.53062	0.60763	0.42527		0.41003	0.45295	0.58438		0.12667	0.12667	0.7995
87.25		0.47866	0.48145	0.37629		0.37175	0.481	0.5145		0.14169	0.14169	0.78855
87.5		0.41624	0.34493	0.30184		0.28046	0.39297	0.39439		0.03154	0.03154	0.66661
87.75		0.38742	0.29895	0.27333		0.26373	0.31354	0.40134		0.11452	0.11452	0.58916
88		0.22445	0.21901	0.18349		0.15091	0.33843	0.29847		0.03607	0.03607	0.43706
88.25		0.16178	0.17301	0.10159		0.01054	0.24308	0.17523		0.11472	0.11472	0.42843
88.5		0.09364	0.0971	0.06556		0.01622	0.03783	0.07333		0.0897	0.0897	0.42149
88.75		-0.06909	-0.11665	-0.06135		-0.0164	0.10833	0.10137		0.12784	0.12784	0.31366
89		-0.18391	-0.19396	-0.1375		-0.0296	-0.000783528	0.01387		0.11825	0.11825	0.21265
89.25		-0.3347	-0.33553	-0.17878		-0.08939	-0.07622	-0.04551		-0.03939	-0.03939	0.06392
89.5		-0.3904	-0.34671	-0.28258		-0.12737	-0.02588	-0.11113		-0.07252	-0.07252	-0.18354
89.75		-0.40423	-0.42152	-0.33335		-0.28359	-0.35304	-0.23729		-0.10284	-0.10284	-0.22479
90		-0.56224	-0.58582	-0.43551		-0.45378	-0.28777	-0.36325		-0.14117	-0.14117	-0.30772
90.25		-0.68603	-0.7368	-0.53922		-0.32279	-0.32923	-0.38075		-0.16537	-0.16537	-0.43823
90.5		-0.74144	-0.69682	-0.60666		-0.45674	-0.47707	-0.40632		-0.19214	-0.19214	-0.44697
90.75		-0.76066	-0.78457	-0.57723		-0.31588	-0.41769	-0.41631		-0.20918	-0.20918	-0.47857
91		-0.69921	-0.7577	-0.4919		-0.47176	-0.44781	-0.46992		-0.15832	-0.15832	-0.46316
91.25		-0.66124	-0.71838	-0.57401		-0.51762	-0.50067	-0.4455		-0.21194	-0.21194	-0.56368
91.5		-0.79571	-0.78587	-0.5705		-0.79348	-0.74817	-0.79332		-0.11269	-0.11269	-0.48242
91.75		-0.72719	-0.70305	-0.51422		-0.50241	-0.48418	-0.46182		-0.06374	-0.06374	-0.47638
92		-0.65357	-0.74639	-0.38244		-0.44774	-0.40546	-0.43866		-0.12122	-0.12122	-0.45643
92.25		-0.6405	-0.66631	-0.50268		-0.4217	-0.4168	-0.42124		-0.08318	-0.08318	-0.47404
92.5		-0.64091	-0.6783	-0.45976		-0.26524	-0.36171	-0.3695		-0.05278	-0.05278	-0.39858
92.75		-0.58919	-0.6487	-0.40598		-0.33022	-0.32384	-0.31757		-0.22758	-0.22758	-0.50884
93		-0.65316	-0.66087	-0.43448		-0.32219	-0.46601	-0.32283		-0.08869	-0.08869	-0.43346
93.25		-0.582	-0.6337	-0.4114		-0.48153	-0.45863	-0.33375		-0.22012	-0.22012	-0.40163
93.5		-0.61227	-0.51881	-0.34912		-0.35801	-0.33721	-0.30639		-0.06153	-0.06153	-0.41625
93.75		-0.60687	-0.6321	-0.40212		-0.32234	-0.3428	-0.3009		-0.06591	-0.06591	-0.3018
94		-0.60018	-0.65436	-0.36242		-0.33279	-0.25325	-0.23743		-0.12135	-0.12135	-0.3103
94.25		-0.57705	-0.49414	-0.33982		-0.38941	-0.32265	-0.2635		-0.11133	-0.11133	-0.32518
94.5		-0.47895	-0.47671	-0.22417		-0.25281	-0.20374	-0.22721		0.00482	0.00482	-0.28928
94.75		-0.3252	-0.29331	-0.22596		-0.10265	-0.19219	-0.1913		-0.04654	-0.04654	-0.28648
95		0.01277	0.04235	-0.05306		0.1497	0.13453	-0.10944		0.24998	0.24998	-0.14952
95.25		0.28793	0.17957	0.15943		0.39458	0.22992	0.0581		0.16129	0.16129	-0.1807
95.5		0.57924	0.44371	0.32414		0.44914	0.40093	0.24458		0.09519	0.09519	-0.29516
95.75		0.77053	0.63129	0.47317		0.60928	0.43695	0.35835		0.28332	0.28332	-0.19053
96		0.82188	0.66298	0.58706		0.70514	0.73601	0.54571		0.26273	0.26273	-0.18496
96.25		0.80882	0.64628	0.6456		0.66334	0.57888	0.55382		0.41512	0.41512	-0.06823
96.5		0.76645	0.61651	0.65265		0.61505	0.60193	0.53046		0.33388	0.33388	-0.16536
96.75		0.63484	0.59398	0.49449		0.63424	0.58178	0.53631		0.28306	0.28306	-0.17336
97		0.50449	0.48206	0.4231		0.57235	0.47116	0.3794		0.24296	0.24296	-0.12151
97.25		0.42838	0.3753	0.34264		0.49467	0.52187	0.3956		0.29284	0.29284	-0.04689
97.5		0.34939	0.31587	0.26448		0.39358	0.47704	0.34834		0.12427	0.12427	-0.14282
97.75		0.3135	0.28334	0.23079		0.26457	0.3275	0.24426		0.25604	0.25604	-0.06386
98		0.23316	0.15458	0.1589		0.1949	0.39099	0.14684		0.16352	0.16352	-0.08783
98.25		0.11105	0.09188	0.08906		0.12627	0.155	0.11769		0.14577	0.14577	-0.16806
98.5		-0.05629	-0.01864	-0.01552		0.19702	0.20834	0.07955		0.0746	0.0746	-0.13905
98.75		-0.08551	-0.02761	-0.04963		-0.07414	-0.01581	-0.01044		0.06206	0.06206	-0.20362
99		-0.14604	-0.21791	-0.12342		-0.01567	-0.04663	-0.04445		0.01404	0.01404	-0.17549
99.25		-0.29159	-0.23499	-0.13717		-0.04265	-0.03192	-0.12095		-0.08393	-0.08393	-0.18195
99.5		-0.48517	-0.47268	-0.31107		-0.22305	-0.15544	-0.17103		-0.18627	-0.18627	-0.21502
99.75		-0.44098	-0.42575	-0.29341		-0.25501	-0.23114	-0.24318		-0.11764	-0.11764	-0.24576
100		-0.49294	-0.48307	-0.31467		-0.33564	-0.33869	-0.27157		-0.1748	-0.1748	-0.22078
100.25		-0.47188	-0.56111	-0.41704		-0.4369	-0.27909	-0.27856		-0.21295	-0.21295	-0.19519
100.5		-0.64729	-0.58346	-0.39079		-0.41451	-0.44439	-0.36851		-0.31092	-0.31092	-0.22046
100.75		-0.60748	-0.70023	-0.4334		-0.50843	-0.45469	-0.36869		-0.20026	-0.20026	-0.22006
101		-0.59596	-0.63043	-0.43199		-0.38138	-0.51667	-0.31686		-0.26907	-0.26907	-0.23143
101.25		-0.65361	-0.73207	-0.46134		-0.50159	-0.5568	-0.35578		-0.2669	-0.2669	-0.15666
101.5		-0.58721	-0.56007	-0.39026		-0.35347	-0.40795	-0.2396		-0.21517	-0.21517	-0.19262
101.75		-0.66672	-0.66876	-0.41885		-0.35278	-0.37762	-0.23028		-0.1737	-0.1737	-0.11131
102		-0.61452	-0.71574	-0.40443		-0.24476	-0.38121	-0.19698		-0.15528	-0.15528	-0.11493
102.25		-0.60265	-0.63139	-0.34819		-0.22208	-0.37346	-0.19789		-0.13753	-0.13753	-0.1062
102.5		-0.58542	-0.70017	-0.42208		-0.28389	-0.27226	-0.18484		-0.20416	-0.20416	-0.2293
102.75		-0.53011	-0.61666	-0.34139		-0.45206	-0.3612	-0.33131		-0.39453	-0.39453	-0.31006
103		-0.61364	-0.64714	-0.37338		-0.42585	-0.47289	-0.29518		-0.3068	-0.3068	-0.27918
103.25		-0.54778	-0.52733	-0.32312		-0.42042	-0.40944	-0.2982		-0.14396	-0.14396	-0.14062
103.5		-0.4971	-0.61141	-0.32479		-0.3882	-0.44605	-0.25145		-0.10724	-0.10724	-0.17986
103.75		-0.64898	-0.46937	-0.33181		-0.35894	-0.29282	-0.18877		-0.12826	-0.12826	-0.10687
104		-0.437	-0.55151	-0.26826		-0.43314	-0.35793	-0.22977		-0.15173	-0.15173	-0.10458
104.25		-0.39274	-0.53639	-0.28155		-0.36346	-0.29832	-0.15572		-0.06043	-0.06043	-0.06867
104.5		-0.51202	-0.41827	-0.27309		-0.3079	-0.35098	-0.1819		-0.14176	-0.14176	-0.11986
104.75		-0.23497	-0.31584	-0.28082		-0.12984	-0.14709	-0.13697		-0.10063	-0.10063	-0.12311
105		0.02203	-0.08635	-0.14379		-0.000236367	-0.0268	-0.1228		-0.16248	-0.16248	-0.12525
105.25		0.29254	0.17369	0.07936		0.32127	0.20686	0.00125		-0.05675	-0.05675	-0.21787
105.5		0.5322	0.31868	0.31874		0.33991	0.33774	0.14247		0.02505	0.02505	-0.22195
105.75		0.69235	0.57971	0.47875		0.47432	0.42051	0.20554		0.04994	0.04994	-0.2203
106		0.74797	0.54143	0.49553		0.56923	0.5148	0.31905		0.12755	0.12755	-0.17003
106.25		0.73529	0.68775	0.63893		0.58666	0.54463	0.46373		0.24049	0.24049	-0.0447
106.5		0.74297	0.61707	0.50178		0.59775	0.58694	0.57493		0.16883	0.16883	-0.12311
106.75		0.64391	0.69455	0.49887		0.62462	0.61964	0.76761		0.16618	0.16618	-0.10736
107		0.59579	0.55233	0.42945		0.51115	0.56146	0.89457		0.0953	0.0953	-0.14525
107.25		0.50115	0.46063	0.25743		0.56088	0.58759	0.99419		0.09575	0.09575	-0.13707
107.5		0.38612	0.27946	0.20308		0.46859	0.58984	1.06868		0.06239	0.06239	-0.09198
107.75		0.24552	0.32144	0.13257		0.40531	0.32375	0.97458		0.03385	0.03385	-0.04599
108		0.21074	0.21717	0.04679		0.23163	0.28431	0.85287		0.0235	0.0235	-0.05616
108.25		0.10721	0.06221	0.03133		0.21211	0.29382	0.72327		0.11087	0.11087	0.06752
108.5		0.14579	0.14529	0.10714		0.0959	0.13281	0.65925		-0.06428	-0.06428	-0.08994
108.75		0.15567	0.14608	0.16795		0.03271	0.07715	0.54345		0.10275	0.10275	0.00631
109		0.01986	-0.06783	0.01471		0.03414	0.14723	0.43071		0.01519	0.01519	-0.05176
109.25		-0.11206	-0.16162	-0.03773		-0.07277	0.00257	0.33463		-0.02108	-0.02108	-0.01752
109.5		-0.26578	-0.34568	-0.13912		-0.19533	-0.13719	0.23682		0.01176	0.01176	-0.05459
109.75		-0.34899	-0.42714	-0.20146		-0.08424	-0.07598	0.15249		-0.04963	-0.04963	-0.0764
110		-0.45048	-0.46353	-0.25601		-0.14865	-0.18504	0.10419		-0.10181	-0.10181	-0.08394
110.25		-0.38753	-0.46916	-0.27438		-0.33498	-0.20727	-0.01202		-0.08175	-0.08175	-0.04324
110.5		-0.4915	-0.53477	-0.28405		-0.28155	-0.32297	-0.08961		-0.1003	-0.1003	0.00985
110.75		-0.5363	-0.56919	-0.32841		-0.26986	-0.32164	-0.20275		-0.1295	-0.1295	-0.08702
111		-0.50358	-0.52726	-0.29381		-0.31364	-0.45851	-0.32158		-0.16434	-0.16434	-0.05788
111.25		-0.55377	-0.59377	-0.34709		-0.34867	-0.39377	-0.29378		-0.30449	-0.30449	-0.19967
111.5		-0.49641	-0.50133	-0.2996		-0.36808	-0.35679	-0.37272		-0.24974	-0.24974	-0.18611
111.75		-0.56057	-0.56677	-0.318		-0.3083	-0.38602	-0.39283		-0.26037	-0.26037	-0.22007
112		-0.50861	-0.56973	-0.32096		-0.24929	-0.25659	-0.32106		-0.24452	-0.24452	-0.18874
112.25		-0.47849	-0.58921	-0.27033		-0.29494	-0.40528	-0.43039		-0.19527	-0.19527	-0.14724
112.5		-0.46776	-0.45646	-0.22705		-0.40666	-0.35637	-0.45688		-0.19721	-0.19721	-0.13104
112.75		-0.39013	-0.46326	-0.23847		-0.29762	-0.35505	-0.43428		-0.24747	-0.24747	-0.17545
113		-0.41747	-0.52024	-0.24911		-0.48602	-0.42148	-0.53174		-0.20205	-0.20205	-0.10174
113.25		-0.39136	-0.42378	-0.21019		-0.48813	-0.48358	-0.55228		-0.10204	-0.10204	-0.03099
113.5		-0.40231	-0.58556	-0.31704		-0.50165	-0.39313	-0.50927		-0.08519	-0.08519	-0.10094
113.75		-0.46627	-0.42949	-0.26681		-0.36428	-0.38733	-0.44568		-0.15882	-0.15882	-0.11254
114		-0.43165	-0.46788	-0.23041		-0.35728	-0.29361	-0.47618		-0.16371	-0.16371	-0.12393
114.25		-0.3557	-0.38249	-0.2021		-0.39934	-0.33157	-0.42187		-0.0294	-0.0294	-0.07002
114.5		-0.34856	-0.38968	-0.19719		-0.30496	-0.35731	-0.33847		-0.08883	-0.08883	-0.06638
114.75		-0.27745	-0.302	-0.16549		-0.14602	-0.21145	-0.36076		-0.12967	-0.12967	0.00119
115		0.11554	-0.06555	-0.07882		0.08716	0.1127	-0.27207		0.07701	0.07701	0.1285
115.25		0.37471	0.16751	0.09504		0.23631	0.23759	-0.09083		0.21387	0.21387	0.4117
115.5		0.5596	0.45642	0.31094		0.45034	0.35859	0.05221		0.16746	0.16746	0.59072
115.75		0.68258	0.46815	0.50038		0.54524	0.47434	0.2296		0.21122	0.21122	0.71884
116		0.77731	0.54825	0.58789		0.59676	0.64876	0.45769		0.31505	0.31505	0.92522
116.25		0.80807	0.67414	0.6452		0.58491	0.56867	0.503		0.38002	0.38002	1.05214
116.5		0.78206	0.66355	0.59782		0.56213	0.61403	0.70686		0.20686	0.20686	1.10963
116.75		0.59168	0.56776	0.45626		0.58435	0.57607	0.83905		0.24424	0.24424	1.12598
117		0.6383	0.5337	0.40824		0.51562	0.5708	0.87028		0.23232	0.23232	1.14234
117.25		0.48432	0.44845	0.31244		0.43495	0.46322	0.87531		0.21626	0.21626	1.05554
117.5		0.44958	0.43471	0.3016		0.36405	0.42924	0.8395		0.16348	0.16348	1.07387
117.75		0.23693	0.19951	0.15831		0.30879	0.39753	0.77767		0.16676	0.16676	0.94141
118		0.1349	0.21326	0.12089		0.32502	0.33249	0.63896		0.17713	0.17713	0.76982
118.25		0.03825	0.00964	0.11641		0.17937	0.24932	0.48159		0.02604	0.02604	0.64962
118.5		0.02363	0.01004	-0.00952		0.14018	0.17214	0.40501		-0.03559	-0.03559	0.47513
118.75		-0.03206	-0.0193	-0.06571		0.04151	0.11579	0.22584		0.07582	0.07582	0.48145
119		-0.1481	-0.20471	-0.17875		-0.05805	0.00289	0.19331		0.10665	0.10665	0.40959
119.25		-0.18155	-0.19467	-0.12912		-0.06132	-0.03224	0.05372		0.19955	0.19955	0.3137
119.5		-0.32359	-0.26845	-0.21286		-0.22194	-0.23233	-0.1422		0.07941	0.07941	0.20942
119.75		-0.40635	-0.33462	-0.27632		-0.09654	-0.12738	-0.03225		0.02015	0.02015	0.01471
120		-0.47769	-0.51384	-0.34134		-0.17257	-0.17772	-0.13795		-0.12525	-0.12525	-0.10407
120.25		-0.47237	-0.54549	-0.36938		-0.22148	-0.24111	-0.23918		0.00167	0.00167	-0.25741
120.5		-0.51088	-0.51811	-0.36826		-0.29168	-0.30715	-0.32871		-0.14095	-0.14095	-0.38318
120.75		-0.53188	-0.56684	-0.35452		-0.21981	-0.20989	-0.32694		-0.017	-0.017	-0.44073
121		-0.60566	-0.50331	-0.36275		-0.15677	-0.31336	-0.3373		-0.15501	-0.15501	-0.49725
121.25		-0.58829	-0.67052	-0.4021		-0.27604	-0.27801	-0.44835		-0.14261	-0.14261	-0.50328
121.5		-0.56288	-0.64413	-0.39989		-0.27961	-0.29968	-0.47273		-0.12051	-0.12051	-0.56276
121.75		-0.62022	-0.60653	-0.40495		-0.23322	-0.30375	-0.48352		-0.2544	-0.2544	-0.60549
122		-0.57797	-0.71073	-0.39266		-0.28018	-0.34494	-0.49707		-0.19054	-0.19054	-0.58653
122.25		-0.64932	-0.62106	-0.4402		-0.27056	-0.3346	-0.41296		-0.09062	-0.09062	-0.58531
122.5		-0.58669	-0.65769	-0.39652		-0.15002	-0.22461	-0.39244		-0.19212	-0.19212	-0.63692
122.75		-0.6279	-0.69727	-0.43965		-0.31593	-0.38499	-0.39453		-0.16905	-0.16905	-0.52752
123		-0.57983	-0.65688	-0.41096		-0.24775	-0.25991	-0.36678		-0.14707	-0.14707	-0.60663
123.25		-0.55075	-0.53715	-0.3532		-0.38216	-0.41009	-0.41449		-0.11882	-0.11882	-0.45753
123.5		-0.44466	-0.56266	-0.29648		-0.34255	-0.31055	-0.44871		-0.07864	-0.07864	-0.46374
123.75		-0.52035	-0.54267	-0.33595		-0.36406	-0.30857	-0.36762		-0.10914	-0.10914	-0.51453
124		-0.49336	-0.60824	-0.33436		-0.39285	-0.22905	-0.38968		-0.11309	-0.11309	-0.51168
124.25		-0.59804	-0.52527	-0.39849		-0.32419	-0.39247	-0.34784		-0.1782	-0.1782	-0.42232
124.5		-0.62922	-0.53624	-0.41732		-0.37426	-0.36517	-0.34321		-0.09558	-0.09558	-0.4554
124.75		-0.72384	-0.60865	-0.36977		-0.31891	-0.281	-0.34524		-0.10652	-0.10652	-0.33633
125		-0.64207	-0.65384	-0.46559		-0.2739	-0.24259	-0.28539		-0.02401	-0.02401	-0.33794
