# Supplementary material for: Corticothalamic gating of population auditory thalamocortical transmission in mouse
Source: eLife. 2021 May 24;10:e56645. doi: 10.7554/eLife.56645 (PMC8186908; doi:10.7554/eLife.56645)
Supplement: Figure 3—source data 4. [file elife-56645-fig3-data4.xlsx]

## Sheet: Figure 3E
	% of population ON-responses					Stimulation current (mA)	% of population ON-responses	Standard error
Stimulation current (mA)	50	100	150-200	250-300		50	45.25	15.25
	75	75	100	100		100	63.75	8.00391
	30	50	90	100		150-200	92	3.62859
	10	50	95	70		250-300	92.5	7.5
	66	80	83	100
			45
