# Supplementary material for: Corticothalamic gating of population auditory thalamocortical transmission in mouse
Source: eLife. 2021 May 24;10:e56645. doi: 10.7554/eLife.56645 (PMC8186908; doi:10.7554/eLife.56645)
Supplement: Figure 3—source data 5. [file elife-56645-fig3-data5.xlsx]

## Sheet: Figure 3F
	Df/f
Stimulating current (Log)	AC	MGB	IC
1.69897	2.14944	0.32199	0.45962
1.69897	1.27597	0.51577	0.52979
1.69897	0.99646	0.45962	0.5283
1.69897	1.09056	0.52979	0.41526
1.69897	0.91071	0.41571	0.42898
1.69897	1.3101	0.40187	0.55898
1.69897	0.42846	0.40343	0.32861
1.69897	1.034	0.46894	0.53647
1.69897	1.26627	0.49984	0.40297
1.69897		0.52644	0.50968
1.69897		0.40297	0.39657
1.69897		0.50968	0.50601
2	2.5293	2.15461	0.93037
2	1.23405	0.86679	0.97759
2	1.70449	1.69177	0.95828
2	1.38471	1.05625	1.23311
2	1.56327	0.86343	0.97568
2	1.07536	0.86461	0.77443
2	1.0985	0.99799	1.02377
2	1.15199	0.86864	0.89884
2		0.7464	0.73275
2		1.17304	1.05071
2		0.76081	0.7854
2		0.89961	0.84989
2.17609	1.69668	1.56981	1.36606
2.17609	1.65283	1.56911	1.34783
2.17609	1.54829	1.32533	1.36279
2.17609	1.32734	1.30513	1.30762
2.17609	1.10812	1.26424	1.26661
2.17609	1.01523	1.03825	0.97178
2.17609	0.96488	1.16533	1.13475
2.17609	1.19149	1.11599	1.11202
2.17609	1.11797	1.00618	1.07994
2.17609	0.81732	1.07881	1.09456
2.17609	1.29846	0.97062	0.98809
2.17609	1.29718	1.00607	0.9961
2.30103	2.5293	2.15461	1.98938
2.30103	1.86973	1.65306	1.81652
2.30103	1.70449	1.69177	1.73829
2.30103	1.38471	1.68193	1.30762
2.30103	1.56327	1.63145	1.26661
2.30103	1.36399	1.39605	1.31762
2.30103	1.15621	1.42303	1.51251
2.30103	1.37097	1.214	1.30889
2.30103	0.91866	1.17901	1.25127
2.30103	0.89279	1.17304	1.20468
2.30103	1.42674	1.27449	1.34996
2.30103	1.27263	1.17178	1.3371
2.39794	1.92559	2.48771	2.54123
2.39794	1.59603	2.08204	2.25248
2.39794	1.43422	2.02355	2.07869
2.39794	1.17767	1.79102	1.86223
2.39794	1.0122	1.57832	1.85735
2.39794	1.05436	1.47583	1.55757
2.39794	1.0314	1.4515	1.48876
2.39794	1.1566	1.42512	1.49489
2.39794	1.12203	1.24898	1.5558
2.39794	1.05478	1.31734	1.39893
2.39794	0.92048	1.24606	1.39695
2.39794	0.96223	1.14202	1.27435
2.47712	2.16786	3.82034	3.23285
2.47712	1.35949	2.24552	2.05916
2.47712	1.41456	1.69177	1.36279
2.47712	1.32734	1.68193	1.30762
2.47712	1.13789	1.78701	1.26661
2.47712	1.25637	1.61359	1.80405
2.47712	1.24181	1.56793	1.85433
2.47712	1.09435	1.33101	1.6383
2.47712	1.11797	1.32246	1.53359
2.47712	1.33604	1.37639	1.55582
2.47712	1.06735	1.27449	1.49172
2.47712	1.3515	1.17178	1.3371
