# Supplementary material for: Corticothalamic gating of population auditory thalamocortical transmission in mouse
Source: eLife. 2021 May 24;10:e56645. doi: 10.7554/eLife.56645 (PMC8186908; doi:10.7554/eLife.56645)
Supplement: Figure 4—source data 1. [file elife-56645-fig4-data1.xlsx]

## Sheet: Figure 4B
Time	Df/f (AC)
(s)	Control	Gabazine	Wash
0.25	-0.23693	-0.20482	-0.19562
0.5	-0.15757	-0.38109	-0.25533
0.75	-0.2278	-0.1347	-0.21799
1	-0.243	-0.2643	-0.26108
1.25	-0.09821	-0.18943	-0.17127
1.5	-0.1114	-0.36099	-0.22196
1.75	-0.05607	-0.33309	-0.00687
2	-0.08364	-0.18651	-0.1876
2.25	-0.14503	0.00468	0.00153
2.5	-0.07187	-0.17142	-0.2302
2.75	-0.15247	-0.19439	-0.06567
3	-0.18677	-0.16183	-0.22902
3.25	-0.02515	0.21179	0.06804
3.5	0.36989	0.64328	0.57261
3.75	0.65215	0.62969	0.68944
4	1.02747	0.78677	0.74679
4.25	1.10538	0.8187	0.61224
4.5	1.26159	1.09577	0.46507
4.75	0.77594	1.05887	0.44888
5	0.89272	1.02026	0.39182
5.25	0.71665	0.81513	0.17179
5.5	0.37615	0.49029	0.04154
5.75	0.36498	0.30968	-0.12418
6	0.00437	-0.10021	-0.12629
6.25	-0.083	-0.26755	-0.12016
6.5	-0.23882	-0.35745	-0.31106
6.75	-0.08826	-0.33621	-0.21548
7	-0.19697	-0.34796	-0.28848
7.25	-0.37681	-0.35457	-0.16489
7.5	-0.29728	-0.46999	-0.28387
7.75	-0.34737	-0.46666	-0.18448
8	-0.46303	-0.437	-0.16794
8.25	-0.4304	-0.29969	-0.16605
8.5	-0.4422	-0.4407	-0.30571
8.75	-0.28332	-0.29385	-0.13114
9	-0.11778	-0.27952	-0.20867
9.25	-0.22078	-0.4404	-0.32859
9.5	-0.20963	-0.45287	-0.33628
9.75	-0.34121	-0.32133	-0.21561
10	-0.18823	-0.26463	-0.17753
10.25	-0.16397	-0.31388	-0.07614
10.5	-0.20383	-0.28799	-0.14634
10.75	-0.36778	-0.22331	-0.00985
11	-0.35376	-0.29927	-0.09339
11.25	0.00177	-0.06396	-0.31222
11.5	-0.20401	-0.22041	-0.15682
11.75	-0.21539	-0.05188	-0.30363
12	-0.2401	-0.20045	-0.0918
12.25	-0.3528	-0.32098	-0.20084
12.5	-0.21392	-0.23876	-0.27618
12.75	-0.19024	-0.19141	-0.21477
13	-0.04955	0.09257	-0.16188
13.25	0.11655	0.43451	0.48769
13.5	0.45206	0.50983	0.71107
13.75	0.68035	0.37876	1.01347
14	0.79607	0.50595	1.15609
14.25	0.84859	0.41584	1.15015
14.5	0.52325	0.51563	0.83427
14.75	0.67547	0.15983	0.78033
15	0.40425	-0.05539	0.54536
15.25	0.25555	-0.04301	0.23577
15.5	0.17854	-0.07655	0.12576
15.75	-0.1942	-0.10279	-0.19092
16	-0.19417	-0.21875	-0.21786
16.25	-0.20188	-0.22524	-0.35133
16.5	-0.2639	-0.22957	-0.32134
16.75	-0.27657	-0.15286	-0.32427
17	-0.24775	-0.1396	-0.34491
17.25	-0.20534	-0.28773	-0.28488
17.5	-0.36289	-0.18743	-0.32937
17.75	-0.26038	-0.3578	-0.42877
18	-0.27776	-0.20566	-0.38241
18.25	-0.18166	-0.26497	-0.2814
18.5	-0.23598	-0.1917	-0.24029
18.75	-0.29253	-0.18608	-0.36748
19	-0.09327	-0.21072	-0.31275
19.25	-0.21586	-0.05605	-0.24223
19.5	-0.29381	-0.16253	-0.19394
19.75	-0.26208	-0.15283	-0.3062
20	-0.19999	-0.37893	-0.23665
20.25	-0.3202	-0.04066	-0.18031
20.5	-0.20997	-0.09255	-0.16083
20.75	-0.1785	-0.13349	-0.16264
21	-0.22974	-0.0749	-0.15238
21.25	-0.32283	-0.1663	-0.15631
21.5	-0.1347	-0.12954	-0.10601
21.75	-0.1029	-0.13158	-0.19854
22	-0.06216	-0.07704	-0.0809
22.25	-0.1825	-0.04424	-0.15495
22.5	-0.13821	-0.20909	-0.10015
22.75	-0.08029	0.02814	-0.03336
23	0.21921	0.51975	-0.01401
23.25	0.42796	0.70127	-0.14908
23.5	0.60205	0.62543	-0.13013
23.75	0.76106	0.64725	-0.04828
24	0.7539	0.52834	-0.20759
24.25	0.65797	0.48094	-0.11447
24.5	0.44676	0.27412	-0.05564
24.75	0.30389	0.22319	-0.10375
25	0.32507	0.06559	-0.11497
25.25	0.15292	0.09408	-0.07917
25.5	-0.02983	-0.14768	-0.13922
25.75	-0.00973	-0.06091	-0.05633
26	-0.08596	-0.2998	-0.08789
26.25	-0.22145	-0.27098	-0.10583
26.5	-0.27771	-0.15791	-0.12315
26.75	-0.18362	-0.07308	-0.16269
27	-0.31575	-0.12418	-0.1353
27.25	-0.14123	-0.21109	-0.2151
27.5	-0.2126	-0.28722	-0.22835
27.75	-0.27801	-0.03405	-0.08953
28	-0.2651	-0.16795	0.05386
28.25	-0.24351	-0.22545	-0.20492
28.5	-0.23763	-0.20544	-0.12513
28.75	-0.21026	-0.23149	-0.0255
29	-0.27869	-0.16108	-0.12601
29.25	-0.25395	-0.17253	-0.03309
29.5	-0.13161	-0.11974	-0.13368
29.75	-0.17544	-0.03721	0.01455
30	-0.1397	0.02664	-0.0483
30.25	-0.13156	-0.09377	0.14821
30.5	-0.09442	-0.05576	0.01061
30.75	-0.29038	-0.08914	-0.02794
31	-0.16467	-0.10195	0.05481
31.25	-0.04168	-0.15064	-0.15405
31.5	-0.15893	-0.14352	-0.1539
31.75	0.04992	-0.18122	-0.08626
32	0.02274	-0.20062	-0.12071
32.25	-0.19069	-0.16691	-0.1229
32.5	-0.15974	0.20158	-0.0531
32.75	0.06941	0.5214	-0.12519
33	0.28695	0.73788	0.16508
33.25	0.72317	0.68541	0.02018
33.5	0.78539	0.60857	0.01476
33.75	0.76059	0.41617	0.08415
34	0.73372	0.31939	-0.01777
34.25	0.57763	0.36595	-0.01669
34.5	0.4892	0.09161	-0.10936
34.75	0.31098	0.06374	0.06334
35	0.20256	-0.16611	-0.06746
35.25	0.02346	-0.17504	-0.16266
35.5	-0.19912	-0.21289	0.0061
35.75	-0.06761	-0.11704	-0.04667
36	-0.11539	-0.25294	-0.21069
36.25	-0.12424	-0.18476	-0.23422
36.5	-0.15454	-0.33856	-0.08708
36.75	-0.05288	-0.27657	0.09231
37	-0.21458	-0.20873	-0.00827
37.25	-0.21022	-0.1234	-0.05449
37.5	-0.31636	-0.15371	0.03559
37.75	-0.26137	-0.08815	0.02127
38	-0.19809	-0.1113	-0.0884
38.25	-0.22547	-0.15507	0.08281
38.5	-0.16475	-0.10368	-0.01675
38.75	-0.23428	-0.1645	0.04474
39	-0.17823	-0.05086	-0.04386
39.25	-0.26294	-0.06874	0.02888
39.5	-0.26683	-0.27362	-0.11424
39.75	0.01354	-0.04213	-0.08079
40	-0.06201	-0.18628	-0.10037
40.25	-0.07963	-0.13176	0.0137
40.5	-0.07564	-0.17454	0.05651
40.75	-0.13502	-0.14709	-0.04001
41	0.04452	-0.2603	-0.03088
41.25	-0.18115	-0.20817	-0.08608
41.5	-0.1961	0.04893	0.06109
41.75	-0.00513	-0.03632	0.01761
42	-0.12758	-0.02081	0.03388
42.25	-0.23363	0.16694	-0.06889
42.5	0.10937	0.63461	0.31258
42.75	0.40456	0.72003	0.75612
43	0.50397	0.64691	1.0091
43.25	0.72159	0.50444	1.20732
43.5	0.84855	0.42175	1.34157
43.75	0.59538	0.35941	1.27854
44	0.7041	0.36052	0.94326
44.25	0.4043	0.14967	0.90146
44.5	0.31994	0.05672	0.62684
44.75	0.03472	-0.1029	0.41959
45	-0.06738	-0.13545	0.32773
45.25	-0.10204	-0.16121	-0.05104
45.5	-0.01102	-0.08407	-0.28402
45.75	-0.13491	-0.1975	-0.15267
46	-0.05877	-0.3538	-0.33635
46.25	-0.19727	-0.1867	-0.18673
46.5	-0.20773	-0.0765	-0.15857
46.75	-0.30354	-0.19195	-0.38527
47	-0.18915	-0.27972	-0.44159
47.25	-0.36795	-0.38358	-0.38219
47.5	-0.25216	-0.14508	-0.27557
47.75	-0.17321	-0.10835	-0.36323
48	-0.03767	-0.17915	-0.2051
48.25	-0.1341	-0.19467	-0.26144
48.5	-0.20756	-0.16032	-0.29419
48.75	-0.05857	-0.14147	-0.36685
49	-0.12555	-0.04742	-0.26478
49.25	-0.0792	0.00894	-0.2524
49.5	-0.13874	-0.10102	-0.22757
49.75	0.02575	-0.07724	-0.35364
50	-0.21493	-0.31074	-0.20478
50.25	0.06307	0.01613	-0.06165
50.5	-0.23632	-0.14227	-0.19977
50.75	-0.31885	-0.083	-0.13272
51	-0.0916	-0.21433	-0.03607
51.25	-0.14384	0.1018	-0.10555
51.5	-0.21372	0.67975	-0.34278
51.75	-0.08808	0.51953	-0.16074
52	-0.01558	0.91904	-0.07523
52.25	0.06814	1.13871	0.00107
52.5	0.27309	1.07477	-0.08429
52.75	0.45825	0.90919	0.04501
53	0.43958	0.68141	-0.15614
53.25	0.38969	0.51608	-0.04259
53.5	0.48878	0.18312	-0.08398
53.75	0.33031	0.01454	0.03807
54	0.2584	0.0121	-0.12375
54.25	0.04985	-0.16533	-0.13245
54.5	-0.04143	-0.36603	-0.04349
54.75	-0.18184	-0.23085	-0.15933
55	-0.1623	-0.39823	-0.13449
55.25	-0.10918	-0.43623	-0.01514
55.5	-0.12624	-0.33968	-0.17158
55.75	-0.26517	-0.1751	0.03664
56	-0.11262	-0.36734	0.02857
56.25	-0.15742	-0.38558	-0.00414
56.5	-0.13885	-0.17726	-0.11183
56.75	-0.17887	-0.43162	-0.15281
57	-0.06392	-0.4086	-0.20532
57.25	-0.10127	-0.29564	-0.19165
57.5	-0.02841	-0.26985	-0.04616
57.75	-0.20081	-0.22874	-0.03555
58	-0.25328	-0.26481	-0.12362
58.25	-0.07733	-0.19857	0.02907
58.5	-0.19651	-0.16895	0.00326
58.75	0.05179	-0.22011	0.09418
59	-0.12876	-0.15918	-0.0484
59.25	-0.10232	-0.00244	-0.05471
59.5	0.02243	-0.14356	0.04272
59.75	-0.0414	-0.2061	-0.08855
60	-0.04117	-0.09331	0.04121
60.25	-0.08167	-0.05036	-0.13197
60.5	0.04321	-0.18957	-0.04604
60.75	-0.10798	-0.05914	-0.09401
61	-0.01558	-0.01669	-0.09705
61.25	-0.0873	-0.08975	0.05475
61.5	0.03673	-0.14319	0.06948
61.75	-0.02559	0.18326	-0.11466
62	0.12582	0.6241	0.00351
62.25	-0.09509	0.61833	0.01003
62.5	-0.11891	0.54942	0.06191
62.75	-0.09999	0.55352	-0.04083
63	-0.05236	0.45517	-0.0213
63.25	-0.13897	0.26031	-0.01002
63.5	-0.12391	0.34016	0.06235
63.75	-0.05993	0.08036	-0.04173
64	-0.01093	-0.1135	-0.08908
64.25	0.04439	-0.02777	-0.06907
64.5	0.02162	-0.21232	0.00236
64.75	0.0283	-0.17248	0.02676
65	0.07671	-0.15405	-0.05433
65.25	-0.1665	-0.20356	-0.09471
65.5	-0.08981	-0.20245	0.02391
65.75	0.039	-0.19096	-0.04781
66	-0.10547	-0.15146	-0.0461
66.25	-0.18303	-0.22034	-0.15191
66.5	-0.0268	-0.0963	-0.09741
66.75	0.02365	-0.21703	-0.09218
67	0.01117	-0.31676	-0.05005
67.25	-0.13717	-0.12344	-0.03542
67.5	0.0549	-0.20267	0.13833
67.75	-0.06605	-0.17202	0.14399
68	0.08233	-0.16675	-0.05588
68.25	-0.08255	-0.09087	0.02412
68.5	0.05156	-0.13791	-0.05615
68.75	-0.09526	-0.09436	-0.04608
69	-0.16671	-0.21858	0.03937
69.25	0.06653	-0.04527	-0.06937
69.5	-0.03862	-0.14072	0.0115
69.75	-0.02679	-0.05486	-0.12416
70	-0.11342	0.00329	-0.16269
70.25	0.06611	-0.17569	-0.04505
70.5	0.01361	-0.12965	-0.00524
70.75	-0.12526	-0.04638	-0.05938
71	-0.01807	-0.02553	0.03723
71.25	-0.15765	0.04777	-0.0255
71.5	-0.18244	0.09127	0.0281
71.75	0.0726	0.55408	0.40917
72	0.55066	0.66328	0.84838
72.25	0.75557	0.58833	1.14311
72.5	0.9302	0.72	1.25639
72.75	1.06518	0.57139	1.21589
73	0.87363	0.39975	0.8296
73.25	0.86746	0.2635	0.80785
73.5	0.66492	0.18936	0.66141
73.75	0.37898	-0.07521	0.27518
74	0.14379	-0.13677	0.31703
74.25	0.04	-0.38601	0.0369
74.5	-0.17945	-0.15913	-0.13633
74.75	-0.06553	-0.18472	-0.20425
75	-0.18757	-0.22149	-0.42012
75.25	-0.22695	-0.15259	-0.18404
75.5	-0.24047	-0.13485	-0.19757
75.75	-0.11597	-0.03859	-0.22771
76	-0.32688	-0.21575	-0.28924
76.25	-0.15346	-0.20489	-0.40306
76.5	-0.18738	-0.29378	-0.18919
76.75	-0.22814	-0.19768	-0.15471
77	-0.14921	-0.13935	-0.16077
77.25	-0.11981	-0.16285	-0.17142
77.5	-0.23306	-0.02587	-0.27824
77.75	-0.04876	-0.00651	-0.27021
78	-0.10887	-0.21124	-0.22207
78.25	-0.22798	-0.31317	-0.11688
78.5	-0.18213	-0.2218	-0.09279
78.75	-0.14913	-0.21369	0.10099
79	-0.09303	-0.22419	-0.20201
79.25	-0.08282	-0.21938	-0.0587
79.5	-0.0886	-0.17411	-0.13235
79.75	-0.32851	0.02061	0.0244
80	-0.21729	0.02939	-0.41106
80.25	-0.05799	-0.20984	-0.17743
80.5	-0.03999	-0.08544	-0.26325
80.75	-0.0525	0.02148	-0.1812
81	-0.08029	-0.09978	-0.07719
81.25	-0.05384	0.07688	-0.22766
81.5	0.06276	0.63276	-0.13573
81.75	-0.15267	0.5739	-0.031
82	-0.11821	0.70308	-0.17634
82.25	-0.06164	0.58302	-0.08818
82.5	0.0668	0.54975	-0.08561
82.75	-0.08679	0.34044	-0.14587
83	-0.22016	0.17777	0.01345
83.25	-0.15499	0.09815	-0.1132
83.5	-0.08622	-0.02357	-0.11364
83.75	0.25708	-0.11405	-0.07789
84	-0.15086	-0.15042	-0.10849
84.25	-0.13216	-0.1023	0.00633
84.5	-0.14175	-0.04163	-0.14516
84.75	-0.11258	-0.23777	-0.12157
85	-0.14247	-0.07457	-0.08032
85.25	0.02031	-0.28794	-0.17743
85.5	-0.11194	-0.14839	-0.06124
85.75	-0.06602	-0.17062	-0.12317
86	-0.19361	-0.24247	-0.17429
86.25	-0.16537	-0.2475	-0.12106
86.5	-0.25628	-0.35992	-0.19895
86.75	0.03172	-0.22938	-0.12112
87	-0.06857	-0.09155	-0.07002
87.25	-0.03771	-0.30011	0.06613
87.5	-0.08801	-0.13772	-0.13556
87.75	0.06258	-0.08776	-0.05766
88	-0.20021	-0.05141	-0.20878
88.25	-0.09966	-0.09271	-0.07492
88.5	-0.00358	-0.02735	-0.10127
88.75	0.03128	-0.09642	-0.12066
89	0.03574	-0.08846	-0.0782
89.25	-0.08872	-0.09663	-0.06448
89.5	-0.09326	-0.08586	0.03094
89.75	0.05075	-0.2021	-0.07129
90	-0.09952	-0.19481	-0.01044
90.25	-0.07919	-0.12557	0.06516
90.5	-0.10177	-0.05833	-0.01874
90.75	-0.01831	-0.03622	0.000866021
91	-0.06711	0.15738	-0.08545
91.25	-0.00109	0.63168	-0.04492
91.5	-0.06109	0.77562	0.01068
91.75	0.11591	0.79803	-0.01785
92	0.00428	0.64088	-0.0582
92.25	0.24996	0.40899	-0.16357
92.5	-0.09038	0.3192	-0.1376
92.75	-0.10291	0.14123	0.03991
93	-0.08569	0.09252	0.02593
93.25	-0.02531	-0.02841	-0.08882
93.5	-0.02508	-0.14963	-0.01724
93.75	-0.04185	-0.17424	0.01789
94	0.03	-0.2482	-0.0015
94.25	-0.06087	-0.2971	-0.02289
94.5	0.01749	-0.26979	0.01225
94.75	-0.06334	-0.12853	0.03211
95	0.00446	-0.20042	0.02375
95.25	0.09357	-0.18199	0.12416
95.5	-0.18285	-0.02422	0.0334
95.75	0.00446	-0.24283	-0.05562
96	-0.14888	-0.19749	-0.20574
96.25	-0.05954	-0.26135	-0.10584
96.5	-0.0526	-0.13565	-0.25315
96.75	-0.02933	-0.20441	-0.18774
97	0.0121	-0.15223	-0.12538
97.25	0.03045	-0.25884	-0.06967
97.5	-0.00671	-0.09846	-0.01706
97.75	0.00942	-0.19754	-0.11844
98	-0.01544	-0.20726	-0.000200943
98.25	0.05039	-0.12841	0.03324
98.5	-0.04237	-0.01023	-0.03109
98.75	-0.12633	-0.2027	0.05382
99	-0.07887	-0.15203	0.15017
99.25	-0.14449	-0.14227	-0.00131
99.5	-0.01325	-0.09111	-0.08697
99.75	0.09994	-0.11715	-0.06167
100	-0.07104	-0.00759	0.11299
100.25	-0.12509	-0.16594	-0.11276
100.5	-0.00382	-0.11372	-0.04087
100.75	-0.17217	0.10042	0.02823
101	0.18544	0.52084	-0.06998
101.25	0.55692	0.62403	0.02119
101.5	0.66837	0.66618	-0.05354
101.75	0.85874	0.45385	0.02845
102	0.93516	0.46926	-0.04657
102.25	0.85951	0.40595	-0.08289
102.5	0.56612	0.2973	0.22197
102.75	0.53972	0.05952	0.12244
103	0.54526	0.06495	0.08066
103.25	0.27566	0.00368	-0.03192
103.5	0.06501	-0.05497	0.0953
103.75	-0.04764	-0.11173	-0.15694
104	-0.16954	-0.21514	-0.1246
104.25	-0.14362	-0.12419	-0.20307
104.5	-0.10997	-0.20343	-0.11171
104.75	-0.24878	-0.29621	-0.13533
105	-0.32869	-0.11718	-0.14065
105.25	-0.3337	-0.27647	-0.01903
105.5	-0.38989	-0.17563	-0.06761
105.75	-0.24194	-0.23446	0.00173
106	-0.22499	-0.19086	0.09176
106.25	-0.25575	-0.14953	0.12589
106.5	-0.24696	-0.23027	-0.0114
106.75	-0.09085	-0.32049	0.16264
107	-0.27885	-0.12702	-0.03937
107.25	-0.2244	-0.11986	-0.13126
107.5	-0.16944	-0.15898	-0.07591
107.75	-0.10349	-0.19629	-0.11293
108	-0.25342	-0.09686	0.06217
108.25	-0.02054	-0.02969	0.0175
108.5	-0.20179	-0.06004	-0.18907
108.75	-0.25102	-0.10905	-0.09173
109	-0.08624	-0.2673	0.00805
109.25	-0.09497	-0.19991	-0.0414
109.5	0.004	0.02976	-0.07577
109.75	-0.11537	-0.1885	0.04423
110	-0.09661	-0.15554	-0.14058
