# Supplementary material for: Corticothalamic gating of population auditory thalamocortical transmission in mouse
Source: eLife. 2021 May 24;10:e56645. doi: 10.7554/eLife.56645 (PMC8186908; doi:10.7554/eLife.56645)
Supplement: Figure 4—source data 2. [file elife-56645-fig4-data2.xlsx]

## Sheet: Figure 4C
	Count of cortical responses
Experiment Date	CONTROL		400nM_Gabazine_bath		Wash				The percentage of ON cortical responses
	ON	OFF	ON	OFF	ON	OFF			Control	Gabazine	Wash
2016-07-18	7	4	11	0	10	1			63.6364	100	90.9091
	7	4	11	0	9	2			63.6364	100	81.8182
	10	1	11	0	6	5			90.9091	100	54.5455
	9	2	11	0	5	6			81.8182	100	45.4545
2016-07-25	8	4	12	0	6	6			66.6667	100	50
	8	4	12	0	3	9			66.6667	100	25
2016-07-28	5	5	10	0	2	8			50	100	20
	6	4	10	0	5	5			60	100	50
	3	7	10	0	4	6			30	100	40
	4	6	10	0	5	5			40	100	50
2017-03-24	7	5	10	0					58.3333	100
2017-03-29	8	4	12	0	4	8			66.6667	100	33.3333
	8	4	12	0	4	8			66.6667	100	33.3333
	8	4	12	0	3	9			66.6667	100	25
