# Supplementary material for: Corticothalamic gating of population auditory thalamocortical transmission in mouse
Source: eLife. 2021 May 24;10:e56645. doi: 10.7554/eLife.56645 (PMC8186908; doi:10.7554/eLife.56645)
Supplement: Figure 4—source data 3. [file elife-56645-fig4-data3.xlsx]

## Sheet: Figure 4F
	Normalization against ON-responses
	Inhibition	Excitation
Cell #1	0.352673	0.513117
Cell #2	0.188811	0.668668
Cell #3	0.144834	0.254323
Cell #4	0.45191
Cell #5	0.492091	0.430855
Cell #6	0.451909
Cell #7	0.954942	0.820206
Cell #8		0.503004
Cell #9	0.311099
Cell #10	0.356064
Cell #11	0.681602
