# Supplementary material for: Corticothalamic gating of population auditory thalamocortical transmission in mouse
Source: eLife. 2021 May 24;10:e56645. doi: 10.7554/eLife.56645 (PMC8186908; doi:10.7554/eLife.56645)
Supplement: Figure 4—source data 4. [file elife-56645-fig4-data4.xlsx]

## Sheet: Figure 4G
		Normalization against ON-responses
Experiment date		Inhibition	Excitation
2016-11-22	Cell #1	0.98817	1.24953
2016-11-28	Cell #2	1.02467
2017-05-15	Cell #3	1.01736
	Cell #4	1.14658
2017-05-16	Cell #5	1.13499
	Cell #6	1.00908
	Cell #7	0.96177
	Cell #8	1.1742
2017-05-22	Cell #9	0.79008	0.93462
2017-05-23	Cell #10	1.07921	0.86689
	Cell #11	1.09584	1.0273
2017-05-29	Cell #12	1.0455	0.96557
	Cell #13		1.08439
	Cell #14		0.9219
	Cell #15	1.01637	0.72132
	Cell #16	1.14873	1.18477
	Cell #17	1.04385	0.95887
	Cell #18	1.00416	1.02161
	Cell #19	1.20699	0.91509
2017-05-30	Cell #20	1.06114	1.02583
	Cell #21	1.0125	0.99706
	Cell #22	0.98411
Total nymber of cells		20	14
