# Supplementary material for: Corticothalamic gating of population auditory thalamocortical transmission in mouse
Source: eLife. 2021 May 24;10:e56645. doi: 10.7554/eLife.56645 (PMC8186908; doi:10.7554/eLife.56645)
Supplement: Figure 4—source data 5. [file elife-56645-fig4-data5.xlsx]

## Sheet: Figure 4I
Time	Df/f (AC)
(s)	Control	Gabazine in MGB	Wash	Gabazine in AC
0	-0.16589	-0.05717	-0.17002	-0.1178
0.25	-0.13339	-0.05838	-0.15182	-0.09866
0.5	-0.10911	-0.11866	-0.14622	-0.04408
0.75	-0.11529	-0.11604	-0.11469	-0.05507
1	-0.07439	0.01331	-0.09671	-0.16874
1.25	-0.17742	-0.14596	-0.1414	-0.09878
1.5	-0.14537	-0.08777	-0.17095	-0.13192
1.75	-0.19366	-0.12668	-0.25027	-0.05596
2	-0.16712	-0.10394	-0.17368	-0.10499
2.25	-0.05782	-0.0706	-0.12583	-0.11541
2.5	0.03501	-0.03178	-0.04443	-0.00197
2.75	-0.0623	-0.01638	-0.04914	0.03431
3	-0.0192	-0.03391	-0.03779	-0.18934
3.25	-0.05502	-0.03665	-0.01971	-0.07298
3.5	0.00796	-0.13773	-0.01988	-0.06128
3.75	-0.03842	-0.14858	-0.01653	-0.1271
4	-0.07221	-0.08333	-0.03341	-0.01523
4.25	0.03321	0.40135	0.10084	0.04887
4.5	0.28994	0.72192	0.33648	0.45517
4.75	0.62487	0.92646	0.58648	0.55024
5	0.67966	0.92705	0.65366	0.41938
5.25	0.56945	0.87097	0.74759	0.42775
5.5	0.55427	0.4618	0.61543	0.49238
5.75	0.38285	0.25178	0.47641	0.2939
6	0.21278	0.09009	0.25964	0.12801
6.25	0.08502	-0.02943	0.14163	0.02873
6.5	-0.02583	0.01175	0.02624	0.01017
6.75	-0.17545	-0.1488	-0.11163	-0.09874
7	-0.12041	-0.20876	-0.13384	-0.20186
7.25	-0.12748	-0.15135	-0.23367	-0.11586
7.5	-0.14761	-0.12853	-0.16551	-0.11225
7.75	-0.18963	-0.1235	-0.2405	-0.09922
8	-0.19241	-0.23723	-0.24649	-0.19023
8.25	-0.15691	-0.14174	-0.18756	-0.22917
8.5	-0.103	-0.24766	-0.22237	-0.1409
8.75	-0.26638	-0.27474	-0.28835	-0.18331
9	-0.3034	-0.1902	-0.26364	-0.16613
9.25	-0.15667	-0.28353	-0.23766	-0.08444
9.5	-0.201	-0.26047	-0.21214	-0.13329
9.75	-0.18775	-0.19665	-0.20711	-0.07369
10	-0.1826	-0.21723	-0.14634	-0.16173
10.25	-0.1096	-0.19177	-0.15476	-0.13275
10.5	-0.17634	-0.24039	-0.14552	-0.11828
10.75	-0.07154	-0.13105	-0.13732	-0.10028
11	-0.07177	-0.13888	-0.17117	-0.04737
11.25	-0.11944	-0.16903	-0.12416	-0.13444
11.5	-0.19067	-0.15903	-0.16194	-0.13269
11.75	-0.11912	-0.17219	-0.14696	-0.01729
12	-0.1273	-0.11291	-0.1124	-0.08102
12.25	-0.04094	-0.21262	-0.15765	-0.0555
12.5	-0.05307	-0.083	-0.10305	-0.12678
12.75	-0.01386	-0.19315	-0.06351	-0.18166
13	-0.08825	-0.08651	-0.06668	-0.18137
13.25	-0.13904	-0.13263	-0.06643	-0.14573
13.5	-0.07447	-0.21238	-0.18021	-0.09445
13.75	-0.12214	-0.09488	-0.0769	-0.04502
14	-0.04969	0.45065	-0.09826	0.05797
14.25	-0.12034	0.70414	0.1753	0.28084
14.5	0.00713	0.79934	0.36999	0.40338
14.75	0.06269	0.62281	0.51729	0.37548
15	0.01956	0.43742	0.5345	0.22023
15.25	0.05553	0.24437	0.42213	0.1343
15.5	0.000136424	0.08023	0.30285	-0.00221
15.75	-0.01883	0.02134	0.07702	-0.1084
16	0.00926	-0.09282	-0.02813	-0.10481
16.25	-0.10803	-0.15919	-0.07849	-0.11332
16.5	-0.08471	-0.2229	-0.17681	-0.12995
16.75	-0.07032	-0.20879	-0.1905	-0.17241
17	-0.16132	-0.21803	-0.14621	-0.1109
17.25	0.00767	-0.17444	-0.20167	-0.14105
17.5	-0.14419	-0.21973	-0.15521	-0.10907
17.75	-0.05657	-0.22471	-0.16862	-0.19358
18	-0.08475	-0.25295	-0.15908	-0.02201
18.25	-0.1063	-0.23934	-0.16067	-0.10433
18.5	-0.04162	-0.23885	-0.19961	-0.07955
18.75	-0.04857	-0.2109	-0.19546	-0.08692
19	-0.13123	-0.28285	-0.16178	-0.14455
19.25	-0.09996	-0.20866	-0.06717	-0.0565
19.5	0.02397	-0.09865	-0.12604	-0.07764
19.75	-0.06515	-0.1914	-0.09005	-0.04142
20	-0.03427	-0.07553	-0.1736	-0.10616
20.25	-0.10969	-0.22948	-0.13555	-0.09559
20.5	-0.08107	-0.15468	-0.08303	-0.09317
20.75	-0.12725	-0.09534	-0.17357	-0.13437
21	-0.11134	-0.17727	-0.13196	-0.07257
21.25	-0.06909	-0.09642	-0.12823	-0.02032
21.5	-0.00817	-0.11378	-0.06722	-0.02731
21.75	0.06128	-0.10113	-0.10399	-0.09173
22	-0.05804	-0.01082	-0.11278	-0.0111
22.25	-0.01289	-0.10841	-0.14018	-0.07503
22.5	-0.14447	-0.12141	-0.07765	-0.13547
22.75	-0.00774	-0.12961	-0.01427	-0.05655
23	-0.01113	-0.14486	-0.05557	-0.04781
23.25	-0.08681	-0.05233	-0.05338	-0.07731
23.5	-0.02274	-0.08876	-0.03622	-0.05124
23.75	-0.08459	0.34005	0.0114	-0.03921
24	0.06302	0.67777	0.19844	0.30621
24.25	0.16245	0.66712	0.35557	0.49484
24.5	0.39297	0.55075	0.38303	0.40223
24.75	0.56889	0.34624	0.37264	0.15723
25	0.55144	0.1647	0.19378	0.07756
25.25	0.41688	0.10898	0.08576	-0.02912
25.5	0.28265	0.0132	-0.05541	0.05167
25.75	0.00060325	0.00738	-0.09363	-0.05726
26	-0.00549	-0.0536	-0.11869	-0.12767
26.25	-0.05102	-0.08739	-0.09951	-0.18323
26.5	-0.12944	-0.13906	-0.08523	-0.06241
26.75	-0.14304	-0.22034	-0.1316	-0.0589
27	-0.10826	-0.17601	-0.09403	-0.06786
27.25	-0.02228	-0.10265	-0.17587	-0.11836
27.5	-0.02717	-0.21769	-0.10403	-0.0805
27.75	-0.11095	-0.1215	-0.1409	-0.11962
28	-0.04333	-0.12332	-0.17394	-0.06738
28.25	-0.13099	-0.15352	-0.04849	-0.13104
28.5	-0.11369	-0.1894	-0.1946	-0.07499
28.75	-0.1452	-0.1641	-0.09394	-0.17362
29	-0.13072	-0.20651	-0.02159	-0.12965
29.25	-0.1021	-0.08288	-0.07108	-0.04636
29.5	-0.10749	-0.17121	0.00307	-0.08143
29.75	-0.05356	-0.1222	-0.06881	-0.07958
30	-0.09725	-0.07088	-0.06825	-0.13305
30.25	-0.04451	-0.19292	-0.06476	-0.02052
30.5	-0.01113	-0.17526	-0.13458	-0.03575
30.75	-0.06404	-0.11812	-0.06143	-0.01837
31	-0.00377	-0.16939	-0.02565	-0.03772
31.25	-0.06628	-0.03261	0.03708	-0.06041
31.5	-0.09367	-0.06953	-0.06914	-0.07069
31.75	-0.08274	-0.1406	-0.09228	-0.05118
32	-0.09632	-0.09088	-0.0855	-0.0891
32.25	-0.0593	-0.07214	-0.00309	-0.11621
32.5	-0.02053	-0.0854	-0.02497	-0.02556
32.75	-0.0582	-0.13649	0.00184	-0.04085
33	-0.13103	-0.08056	-0.08646	-0.04995
33.25	-0.05777	-0.05885	-0.06159	-0.04672
33.5	-0.01938	0.45455	0.01287	-0.04567
33.75	0.01821	0.76551	0.13883	0.16125
34	0.15125	0.63456	0.43105	0.33032
34.25	0.12754	0.52944	0.52862	0.39867
34.5	-0.0843	0.21675	0.6199	0.2787
34.75	0.02446	0.06869	0.3824	0.11039
35	-0.02209	0.04546	0.2885	0.06069
35.25	-0.06996	-0.02294	0.16297	-0.04841
35.5	-0.07395	-0.15647	0.13756	-0.06802
35.75	0.02167	-0.06447	0.02699	-0.08521
36	-0.08655	-0.14145	-0.11151	-0.02774
36.25	-0.05865	0.00929	-0.13572	-0.03145
36.5	-0.06792	-0.0948	-0.17309	-0.10635
36.75	-0.06556	-0.0827	-0.10878	-0.04603
37	0.03077	-0.1853	-0.1753	-0.06651
37.25	0.05014	-0.19774	-0.11233	-0.11378
37.5	-0.00853	-0.10791	-0.119	-0.09808
37.75	-0.0965	-0.14541	-0.14388	-0.10997
38	-0.10504	-0.226	-0.10102	-0.10603
38.25	-0.09039	-0.20003	-0.15058	-0.12639
38.5	-0.02261	-0.1745	-0.08095	-0.11611
38.75	-0.12535	-0.07059	-0.095	-0.14339
39	-0.00661	-0.1257	-0.1453	-0.0849
39.25	-0.04327	-0.12424	-0.09758	-0.04949
39.5	-0.01309	-0.09446	-0.07729	-0.05433
39.75	0.10225	-0.10934	-0.07844	-0.07385
40	0.02336	-0.08179	-0.03366	-0.11893
40.25	0.0428	-0.15375	-0.08812	-0.02147
40.5	-0.00136	-0.14923	-0.08479	0.00777
40.75	-0.03414	-0.0984	-0.12415	-0.01097
41	-0.06852	-0.11051	-0.03994	-0.05362
41.25	-0.10404	-0.1024	-0.05538	0.10209
41.5	-0.06274	-0.17388	-0.04963	-0.01051
41.75	0.0361	-0.08816	-0.04358	-0.08676
42	-0.07693	-0.04046	-0.03711	0.0059
42.25	-0.0888	-0.06439	-0.03011	-0.03935
42.5	0.03793	-0.07811	-0.06158	-0.04545
42.75	0.01968	-0.0403	-0.08595	-0.04318
43	0.0571	0.01028	0.01795	-0.01453
43.25	-0.05579	0.44497	-0.04225	-0.03874
43.5	0.09313	0.77194	0.09019	0.14905
43.75	0.06116	0.63583	0.18646	0.41278
44	0.04684	0.44195	0.30046	0.3839
44.25	0.0354	0.28741	0.31397	0.24464
44.5	0.00232	0.06679	0.2373	0.151
44.75	0.01373	-0.04198	0.09513	-0.03142
45	0.00768	-0.10013	-0.04235	-0.02545
45.25	-0.09074	-0.07554	-0.06883	-0.07087
45.5	-0.05463	-0.10277	-0.08402	-0.07797
45.75	-0.03085	-0.06586	-0.17685	0.00348
46	0.0167	-0.09279	-0.15336	-0.045
46.25	-0.0673	-0.11657	-0.18111	-0.07764
46.5	-0.1137	-0.13668	-0.15756	-0.19245
46.75	-0.06214	-0.05627	-0.01748	-0.05501
47	-0.03686	-0.13481	-0.04324	-0.09413
47.25	0.04866	-0.19136	-0.01692	-0.07492
47.5	0.0122	-0.08841	0.0013	-0.09638
47.75	-0.01119	-0.24219	-0.00537	-0.1528
48	-0.04596	-0.19064	-0.02077	-0.1314
48.25	0.02263	-0.18575	-0.07512	-0.10797
48.5	0.04878	-0.08989	0.00426	-0.0423
48.75	-0.02869	-0.12826	-0.04563	0.0142
49	-0.05114	-0.1185	-0.08377	-0.03692
49.25	-0.06078	-0.06755	-0.09621	-0.02345
49.5	0.00105	-0.15271	-0.08211	-0.04978
49.75	-0.01672	-0.09512	-0.02439	-0.10665
50	-0.01194	-0.10286	-0.02374	-0.16129
50.25	0.01365	-0.08285	-0.07489	0.03884
50.5	0.11001	-0.05818	-0.05401	0.02275
50.75	-0.05471	-0.0855	-0.0914	-0.05498
51	-0.06458	-0.0793	-0.01595	-0.06602
51.25	-0.06031	-0.10131	-0.01158	-0.00924
51.5	-0.09056	-0.14279	-0.03915	-0.06986
51.75	-0.01879	-0.06845	-0.04242	-0.00591
52	0.03991	-0.07514	0.00534	-0.0317
52.25	-0.00922	0.00707	-0.00675	0.04346
52.5	0.00259	-0.09609	0.00275	-0.04728
52.75	-0.00463	-0.08702	-0.05641	0.00782
53	0.07945	0.40241	0.08537	-0.01431
53.25	0.0192	0.71719	0.18692	0.12729
53.5	0.14249	0.74245	0.3878	0.27184
53.75	0.03371	0.56354	0.53652	0.34401
54	0.07361	0.2706	0.56494	0.3485
54.25	-0.04805	0.0687	0.44017	0.05973
54.5	-0.07065	-0.09935	0.26279	0.07161
54.75	0.02968	-0.05697	0.1474	0.06376
55	0.0094	-0.12955	-0.0012	-0.07025
55.25	-0.00643	-0.08097	-0.09749	-0.07703
55.5	0.07711	-0.12801	-0.0973	-0.17246
55.75	-0.04238	-0.11705	0.0233	-0.09654
56	-0.06195	-0.11501	-0.07733	-0.04326
56.25	-0.0909	-0.10942	-0.11868	-0.00675
56.5	-0.00236	-0.13098	-0.1211	-0.11189
56.75	-0.00906	-0.17617	-0.16382	-0.105
57	-0.04022	-0.09822	-0.07443	0.01043
57.25	-0.02866	-0.08232	-0.14218	-0.03893
57.5	0.03227	-0.1935	-0.12739	-0.141
57.75	-0.06768	-0.12172	-0.04154	-0.12436
58	0.02607	-0.13677	-0.0677	-0.07048
58.25	-0.031	-0.08298	-0.06078	-0.09953
58.5	0.02071	-0.24664	-0.13077	-0.01309
58.75	0.02437	-0.14574	-0.06836	-0.1064
59	-0.03725	-0.11372	-0.118	0.02244
59.25	-0.06248	-0.13788	-0.07855	0.04094
59.5	0.01985	-0.26573	-0.05603	-0.08661
59.75	0.08228	-0.15844	-0.12012	0.00947
60	-0.06414	-0.10032	-0.05484	0.01241
60.25	0.09363	0.02917	-0.11669	-0.1456
60.5	-0.04527	-0.00617	-0.05925	-0.05507
60.75	-0.02666	-0.05785	-0.06361	-0.11142
61	0.01917	-0.08901	-0.09339	-0.09169
61.25	-0.04634	-0.09046	-0.06513	0.02033
61.5	0.000688269	-0.12557	-0.06615	-0.04743
61.75	-0.06739	-0.09134	-0.02998	-0.03905
62	0.000693483	0.02581	-0.05227	-0.087
62.25	0.07002	-0.07977	-0.12229	-0.05156
62.5	0.06489	-0.05745	-0.05559	-0.02421
62.75	0.07028	0.50159	0.00795	-0.04194
63	0.00629	0.62716	0.028	-0.04001
63.25	-0.11121	0.6595	0.04948	-0.03487
63.5	-0.01564	0.5726	-0.02737	-0.0817
63.75	-0.03968	0.26168	0.02373	-0.03851
64	0.15982	0.08612	-0.03085	-0.00186
64.25	0.23804	0.02404	0.01853	-0.01257
64.5	0.50723	-0.11232	-0.09545	-0.03647
64.75	0.58031	-0.0331	-0.04094	0.14127
65	0.45648	-0.08152	-0.04556	-0.05983
65.25	0.32339	-0.16071	-0.05119	-0.02993
65.5	0.1488	-0.09295	-0.04814	0.04709
65.75	0.0246	-0.10326	-0.01145	-0.00964
66	0.00484	-0.13851	-0.00385	-0.04898
66.25	-0.07588	-0.08575	-0.01712	0.02327
66.5	-0.11155	-0.17205	-0.10257	-0.00509
66.75	-0.08158	-0.16802	-0.05525	0.02171
67	-0.12052	-0.14843	-0.03753	-0.12143
67.25	-0.15964	-0.20092	-0.02695	-0.07508
67.5	-0.03819	-0.10582	-0.02451	-0.04892
67.75	-0.08757	-0.18413	-0.01793	0.05431
68	-0.08639	-0.11848	0.01221	-0.00915
68.25	0.02236	-0.06085	-0.03862	-0.00953
68.5	-0.13491	-0.0698	-0.04413	-0.00467
68.75	-0.08427	-0.13661	0.00283	-0.00717
69	-0.09796	-0.05144	-0.06986	-0.06754
69.25	-0.06888	-0.12367	0.00135	-0.05329
69.5	-0.00756	-0.15154	-0.07233	0.05231
69.75	-0.09129	-0.16457	-0.11737	-0.00268
70	-0.13137	-0.13037	-0.07202	0.01252
70.25	-0.07263	-0.02117	-0.01187	-0.06254
70.5	-0.10923	-0.07383	0.02318	-0.03851
70.75	-0.09003	-0.06343	-0.05358	-0.0174
71	-0.06862	-0.16508	-0.03007	0.00767
71.25	-0.18394	-0.10471	0.06764	-0.03859
71.5	-0.04312	-0.09114	0.0077	-0.03834
71.75	-0.10928	-0.09854	0.00418	-0.08034
72	-0.02243	-0.04058	-0.08379	-0.06227
72.25	0.06577	-0.09766	-0.05405	-0.01032
72.5	0.01719	0.46308	-0.00317	-0.0677
72.75	-0.07271	0.76516	0.22019	0.1437
73	-0.02395	0.6824	0.39477	0.38585
73.25	-0.06186	0.59132	0.55391	0.51226
73.5	0.03174	0.2443	0.60499	0.41888
73.75	-0.012	0.0399	0.54966	0.35141
74	-0.00512	-0.04936	0.43875	0.19633
74.25	-0.0483	-0.08742	0.22815	0.16821
74.5	-0.01114	0.01294	0.12056	0.08788
74.75	-0.03623	-0.09585	0.01052	-0.01282
75	-0.02011	-0.14223	-0.00223	-0.01611
75.25	-0.01273	-0.16213	-0.10663	-0.03585
75.5	-0.02068	-0.13936	-0.08856	-0.09843
75.75	-0.0463	-0.12089	-0.06289	-0.08693
76	-0.01169	-0.12124	-0.10185	-0.08973
76.25	-0.06496	-0.13146	-0.08818	-0.03395
76.5	-0.10636	-0.11424	-0.16372	-0.00651
76.75	0.00262	-0.1074	-0.08352	-0.09963
77	-0.15537	-0.20156	-0.20938	-0.09831
77.25	0.02617	-0.2059	-0.16652	-0.12293
77.5	-0.0863	-0.17932	-0.15988	-0.08333
77.75	-0.0135	-0.16885	-0.16509	-0.16029
78	-0.03924	-0.13692	-0.03208	-0.03236
78.25	-0.00799	-0.12125	-0.05114	-0.08533
78.5	-0.06805	-0.07859	-0.03503	-0.10788
78.75	-0.01896	-0.11135	-0.15243	-0.05379
79	-0.06431	-0.017	-0.14285	-0.04036
79.25	0.01186	-0.10526	-0.10135	-0.04723
79.5	-0.02686	-0.09891	-0.06414	-0.04251
79.75	-0.02405	-0.04952	-0.07365	-0.14154
80	0.05625	-0.14257	-0.14276	0.00702
80.25	0.05288	-0.11186	-0.05331	-0.01894
80.5	-0.06767	-0.06595	-0.10398	-0.01749
80.75	-0.0071	-0.15924	-0.09502	0.00586
81	-0.07313	0.02124	-0.06991	-0.07926
81.25	-0.0453	-0.03592	-0.04241	-0.07526
81.5	-0.01578	-0.09319	-0.10076	-0.02192
81.75	-0.00759	-0.07238	-0.05563	-0.02471
82	-0.04376	-0.08813	-0.05654	0.00525
82.25	-0.04241	0.42173	-0.04988	-0.10674
82.5	0.07305	0.69495	-0.02285	0.00819
82.75	0.000800454	0.69953	0.11834	-0.14764
83	-0.01441	0.52731	0.26704	-0.04971
83.25	0.00345	0.26529	0.30446	-0.00239
83.5	0.05121	0.14809	0.36015	-0.07592
83.75	0.05372	-0.02401	0.34437	0.03104
84	-0.000156454	-0.0538	0.27181	-0.04783
84.25	0.00559	-0.13598	0.21641	0.01295
84.5	-0.1025	-0.16341	0.06885	-0.05145
84.75	0.000502738	-0.12955	-0.10045	-0.02619
85	-0.05627	-0.08659	-0.09457	-0.039
85.25	-0.07631	-0.11128	-0.13568	-0.09615
85.5	0.00319	-0.18904	-0.12385	0.05298
85.75	-0.00716	-0.20446	-0.0884	-0.02602
86	0.00306	-0.16543	-0.12031	-0.03403
86.25	-0.01286	-0.12985	-0.13904	-0.01724
86.5	0.01796	-0.02724	-0.11694	0.01135
86.75	-0.04483	-0.20519	-0.09899	0.02385
87	-0.00938	-0.14709	-0.17153	-0.10472
87.25	-0.05071	-0.13929	-0.10379	-0.00732
87.5	-0.00448	-0.08408	-0.10336	-0.0227
87.75	-0.00736	-0.1465	-0.15096	0.01479
88	0.0507	-0.15086	-0.03742	-0.03906
88.25	0.0238	-0.10296	-0.10125	-0.02874
88.5	-0.02428	-0.13235	-0.03309	-0.02202
88.75	-0.04243	-0.10184	-0.10623	-0.1091
89	0.03054	-0.19481	-0.09256	0.02494
89.25	0.01141	-0.15586	-0.08485	-0.10629
89.5	-0.00803	-0.08384	-0.11355	-0.04759
89.75	-0.04468	-0.12172	-0.08699	-0.01342
90	-0.04807	-0.08647	-0.08742	0.04879
90.25	-0.00903	-0.07609	-0.15222	-0.04534
90.5	0.04325	-0.08286	-0.06723	0.01677
90.75	-0.0228	-0.08955	-0.1149	-0.01491
91	-0.05045	-0.04716	-0.08172	-0.00576
91.25	0.00813	-0.09653	-0.01185	0.02389
91.5	-0.03692	-0.05069	-0.00373	-0.11738
91.75	-0.07085	-0.12203	-0.02132	-0.06204
92	-0.05078	0.43213	0.03563	-0.04311
92.25	-0.0396	0.79852	0.01704	0.09142
92.5	0.04587	0.76756	-0.03392	0.00557
92.75	0.1033	0.5991	-0.00524	0.04182
93	0.04166	0.29279	0.02507	0.04125
93.25	-0.04198	-0.02049	-0.01185	-0.08555
93.5	-0.01004	-0.06313	-0.0385	-0.10193
93.75	0.01296	-0.10635	-0.0226	-0.08665
94	0.09539	-0.1643	-0.09446	-0.1037
94.25	0.02294	-0.08957	-0.04948	-0.05435
94.5	0.01775	-0.10757	0.0069	0.04311
94.75	-0.02555	-0.1151	-0.07901	0.04597
95	0.04657	-0.05585	-0.06606	0.01484
95.25	-0.04596	-0.18938	0.01215	-0.02465
95.5	-0.04136	-0.17587	-0.11306	-0.03809
95.75	0.00446	-0.17067	-0.07333	-0.11449
96	0.00521	-0.13362	-0.04279	-0.09827
96.25	0.05564	-0.1685	-0.02972	-0.14837
