# Supplementary material for: Corticothalamic gating of population auditory thalamocortical transmission in mouse
Source: eLife. 2021 May 24;10:e56645. doi: 10.7554/eLife.56645 (PMC8186908; doi:10.7554/eLife.56645)
Supplement: Figure 4—source data 6. [file elife-56645-fig4-data6.xlsx]

## Sheet: Figure 4J
Time	Df/f (AC)
(s)	Control	Gabazine in AC	Wash	Gabazine in MGB
0.25	-0.65059	-0.76761	-0.47483	-0.46294
0.5	-0.73153	-0.72938	-0.46656	-0.43305
0.75	-0.67722	-0.70054	-0.43071	-0.36147
1	-0.65865	-0.78501	-0.43429	-0.29583
1.25	-0.587	-0.71586	-0.47106	-0.24079
1.5	-0.4667	-0.63735	-0.3907	-0.20449
1.75	-0.12744	-0.39958	-0.26879	0.08907
2	0.19205	0.01729	-0.06866	0.39972
2.25	0.54407	0.27478	0.22036	0.72687
2.5	0.81399	0.51391	0.45589	0.92151
2.75	1.02031	0.68771	0.6106	0.99821
3	1.14334	0.86364	0.71237	1.07449
3.25	1.23798	0.91282	0.7194	0.94584
3.5	1.23211	0.86987	0.70305	0.9091
3.75	1.0839	0.70373	0.62519	0.81783
4	0.90256	0.60733	0.54665	0.68171
4.25	0.71942	0.55131	0.50905	0.57168
4.5	0.5886	0.40836	0.40682	0.38445
4.75	0.42354	0.28747	0.29673	0.27005
5	0.2733	0.12624	0.17785	0.20945
5.25	0.07362	0.01458	0.00409	0.10965
5.5	-0.12524	-0.11129	0.00556	0.04434
5.75	-0.36855	-0.35163	-0.0915	-0.14213
6	-0.56137	-0.585	-0.2451	-0.2958
6.25	-0.67974	-0.70586	-0.3717	-0.4083
6.5	-0.80497	-0.72536	-0.34872	-0.46671
6.75	-0.84404	-0.77349	-0.44207	-0.44469
7	-0.95756	-0.86266	-0.49746	-0.39402
7.25	-0.98452	-0.90819	-0.4901	-0.46397
7.5	-1.03621	-0.95194	-0.44808	-0.39577
7.75	-1.02194	-0.96151	-0.47427	-0.44131
8	-0.96892	-0.9147	-0.50106	-0.45162
8.25	-0.96466	-0.9081	-0.54146	-0.44898
8.5	-1.0157	-0.88738	-0.55809	-0.4773
8.75	-0.9979	-0.84288	-0.53835	-0.49816
9	-0.93708	-0.87648	-0.51686	-0.43409
9.25	-0.90343	-0.91551	-0.57474	-0.49565
9.5	-0.93623	-0.86384	-0.51877	-0.48611
9.75	-0.8532	-0.8762	-0.55519	-0.43386
10	-0.8751	-0.88623	-0.54614	-0.42571
10.25	-0.81406	-0.90497	-0.53522	-0.51482
10.5	-0.7853	-0.79524	-0.46524	-0.49625
10.75	-0.83796	-0.8216	-0.49555	-0.3924
11	-0.79184	-0.7877	-0.40955	-0.44018
11.25	-0.75901	-0.80321	-0.39139	-0.39518
11.5	-0.69837	-0.76449	-0.33312	-0.23891
11.75	-0.50883	-0.64675	-0.06047	0.02205
12	-0.15927	-0.47553	0.14424	0.28849
12.25	0.13399	-0.21627	0.36112	0.41051
12.5	0.26174	0.10904	0.5259	0.43298
12.75	0.26553	0.24773	0.50299	0.41627
13	0.27143	0.33794	0.44284	0.33689
13.25	0.21915	0.36228	0.45908	0.33181
13.5	0.09644	0.26687	0.35001	0.28665
13.75	0.03592	0.11799	0.25877	0.2149
14	-0.06781	0.10785	0.1642	0.14641
14.25	-0.14495	-0.01672	0.08558	0.03641
14.5	-0.26977	-0.03376	0.11214	-0.06997
14.75	-0.36141	-0.15464	-0.09862	-0.13412
15	-0.44308	-0.29701	-0.09628	-0.2087
15.25	-0.50444	-0.36002	-0.15259	-0.22748
15.5	-0.55879	-0.50201	-0.24534	-0.35664
15.75	-0.75774	-0.64801	-0.39147	-0.47652
16	-0.74027	-0.74041	-0.44864	-0.53965
16.25	-0.81635	-0.79299	-0.48119	-0.56855
16.5	-0.85104	-1.0841	-0.51764	-0.51915
16.75	-0.83698	-1.00733	-0.53641	-0.51343
17	-0.77942	-1.07201	-0.54785	-0.50872
17.25	-0.79717	-1.0306	-0.523	-0.60365
17.5	-0.77589	-0.96112	-0.43381	-0.5537
17.75	-0.69327	-0.87699	-0.41135	-0.51025
18	-0.71715	-0.97421	-0.4198	-0.51225
18.25	-0.70406	-0.831	-0.46945	-0.54769
18.5	-0.699	-0.75434	-0.47644	-0.50262
18.75	-0.73481	-0.76652	-0.465	-0.52926
19	-0.69473	-0.74075	-0.39812	-0.47933
19.25	-0.70544	-0.63325	-0.43278	-0.48173
19.5	-0.64382	-0.57568	-0.38866	-0.45897
19.75	-0.66315	-0.60946	-0.41247	-0.36683
20	-0.60163	-0.58321	-0.37608	-0.42137
20.25	-0.57844	-0.64269	-0.37452	-0.39753
20.5	-0.57606	-0.60016	-0.41125	-0.38417
20.75	-0.56877	-0.58095	-0.34388	-0.38399
21	-0.55478	-0.57432	-0.30805	-0.34153
21.25	-0.50581	-0.53034	-0.3671	-0.1239
21.5	-0.29649	-0.48773	-0.32729	0.11839
21.75	0.03925	-0.3379	-0.27803	0.2727
22	0.27806	-0.02455	-0.26907	0.49951
22.25	0.44854	0.27391	-0.29839	0.60806
22.5	0.60384	0.55966	-0.24977	0.60282
22.75	0.64072	0.70123	-0.21547	0.50876
23	0.54061	0.71522	-0.3017	0.41557
23.25	0.49056	0.66063	-0.28081	0.38464
23.5	0.36452	0.63904	-0.3337	0.32575
23.75	0.22129	0.47533	-0.25068	0.1424
24	0.14429	0.27658	-0.27721	0.11385
24.25	0.07732	0.09043	-0.27295	0.05316
24.5	-0.01912	0.00325	-0.30462	-0.06486
24.75	-0.15451	-0.14212	-0.28509	-0.12439
25	-0.22326	-0.24192	-0.29725	-0.20814
25.25	-0.31229	-0.37062	-0.35088	-0.28556
25.5	-0.41801	-0.51181	-0.46956	-0.43975
25.75	-0.55087	-0.57091	-0.45166	-0.40884
26	-0.60766	-0.70167	-0.44077	-0.41391
26.25	-0.65479	-0.7495	-0.40843	-0.49551
26.5	-0.62716	-0.79585	-0.31024	-0.46201
26.75	-0.66921	-0.78634	-0.25114	-0.45196
27	-0.64883	-0.7083	-0.24629	-0.48284
27.25	-0.64968	-0.78602	-0.17828	-0.44883
27.5	-0.63273	-0.75766	-0.22668	-0.47033
27.75	-0.6491	-0.68826	-0.28164	-0.43485
28	-0.6903	-0.75663	-0.24316	-0.44995
28.25	-0.6745	-0.67277	-0.14834	-0.42135
28.5	-0.67066	-0.61558	-0.1165	-0.51246
28.75	-0.66129	-0.48701	-0.15027	-0.43923
29	-0.60545	-0.60863	-0.18786	-0.49425
29.25	-0.60331	-0.62102	-0.15107	-0.47783
29.5	-0.5837	-0.66898	-0.11782	-0.42044
29.75	-0.53883	-0.62441	-0.2219	-0.4014
30	-0.50918	-0.50822	-0.17846	-0.40272
30.25	-0.49453	-0.59231	-0.21772	-0.39606
30.5	-0.49043	-0.57218	-0.22888	-0.37691
30.75	-0.48386	-0.62199	-0.15389	-0.36363
31	-0.44613	-0.62098	-0.07034	-0.1698
31.25	-0.46282	-0.63728	0.11822	0.00685
31.5	-0.21417	-0.5824	0.48252	0.24973
31.75	0.13208	-0.52998	0.68968	0.481
32	0.45301	-0.1267	0.88827	0.50935
32.25	0.55525	0.08105	0.93422	0.55421
32.5	0.61956	0.30437	0.96705	0.55656
32.75	0.57026	0.54447	0.92234	0.46979
33	0.50137	0.44169	0.84825	0.37946
33.25	0.43804	0.50379	0.76487	0.26303
33.5	0.3484	0.46821	0.56354	0.17572
33.75	0.2476	0.40265	0.59523	0.13815
34	0.06631	0.27348	0.44129	0.06056
34.25	-0.00574	0.27105	0.32457	0.01723
34.5	-0.0544	0.04902	0.22709	-0.10818
34.75	-0.03997	-0.11816	0.15731	-0.1485
35	-0.16116	-0.21038	0.06513	-0.23255
35.25	-0.26329	-0.37285	-0.13353	-0.38612
35.5	-0.39426	-0.42541	-0.21924	-0.42598
35.75	-0.51164	-0.50771	-0.22821	-0.42831
36	-0.53988	-0.54075	-0.32449	-0.41582
36.25	-0.54883	-0.54924	-0.35934	-0.44663
36.5	-0.53276	-0.5631	-0.30845	-0.4495
36.75	-0.57362	-0.58215	-0.35644	-0.43102
37	-0.56464	-0.6474	-0.32396	-0.46283
37.25	-0.55687	-0.70141	-0.34166	-0.42536
37.5	-0.50447	-0.66645	-0.30166	-0.43231
37.75	-0.49829	-0.71105	-0.34423	-0.41187
38	-0.52158	-0.64428	-0.32257	-0.38424
38.25	-0.48705	-0.67271	-0.29697	-0.38496
38.5	-0.49304	-0.62896	-0.32235	-0.45055
38.75	-0.41334	-0.53703	-0.29919	-0.41766
39	-0.38637	-0.56184	-0.34972	-0.37235
39.25	-0.46718	-0.53825	-0.3938	-0.39072
39.5	-0.38776	-0.51313	-0.38816	-0.38085
39.75	-0.42741	-0.43135	-0.37991	-0.39539
40	-0.38682	-0.54412	-0.32339	-0.36448
40.25	-0.35775	-0.48933	-0.31973	-0.39745
40.5	-0.33517	-0.53869	-0.31399	-0.38845
40.75	-0.34601	-0.38454	-0.23927	-0.19625
41	-0.33415	-0.45437	-0.26766	0.06546
41.25	-0.07696	-0.40437	-0.2907	0.20205
41.5	0.15949	-0.36421	-0.23853	0.3921
41.75	0.34314	-0.41888	-0.23881	0.46133
42	0.61282	-0.39083	-0.18128	0.51427
42.25	0.68827	-0.35305	-0.18069	0.53377
42.5	0.74721	-0.41537	-0.26593	0.4233
42.75	0.78105	-0.68117	-0.17871	0.32384
43	0.68162	-0.45586	-0.19621	0.24291
43.25	0.60136	-0.48528	-0.20991	0.25638
43.5	0.47877	-0.27668	-0.22544	0.10413
43.75	0.37895	-0.30897	-0.25319	0.11992
44	0.23822	-0.24803	-0.2359	-0.000417104
44.25	0.17391	-0.31251	-0.21054	-0.09275
44.5	0.08411	-0.17493	-0.24422	-0.18057
44.75	0.00172	-0.23201	-0.20526	-0.25343
45	-0.17639	-0.14522	-0.23393	-0.39111
45.25	-0.31	-0.19326	-0.21498	-0.45484
45.5	-0.43535	-0.19151	-0.17547	-0.46607
45.75	-0.51982	-0.17881	-0.21652	-0.50423
46	-0.53889	-0.19056	-0.2062	-0.44033
46.25	-0.53675	-0.16715	-0.21359	-0.43683
46.5	-0.5354	-0.073	-0.13833	-0.41746
46.75	-0.55623	-0.11732	-0.15075	-0.44196
47	-0.60241	-0.12383	-0.16612	-0.53825
47.25	-0.52516	-0.00251	-0.17778	-0.54647
47.5	-0.52746	-0.04538	-0.20679	-0.47231
47.75	-0.53497	-0.07778	-0.13219	-0.503
48	-0.52145	-0.05854	-0.21229	-0.42676
48.25	-0.46749	-0.05594	-0.27559	-0.39048
48.5	-0.48492	-0.0315	-0.27117	-0.39591
48.75	-0.44405	-0.1397	-0.20868	-0.28795
49	-0.46507	0.05625	-0.16004	-0.29192
49.25	-0.38724	0.07448	-0.17257	-0.30886
49.5	-0.41616	0.05842	-0.13424	-0.28524
49.75	-0.37561	0.16882	-0.08808	-0.24639
50	-0.37864	0.000934698	-0.04683	-0.2534
50.25	-0.39967	-0.00642	-0.02638	-0.16877
50.5	-0.27764	-0.04155	-0.01073	-0.11832
50.75	-0.26599	-0.02059	-0.0023	0.0967
51	-0.23014	-0.03086	0.00921	0.24979
51.25	-0.23747	-0.03073	0.10937	0.30811
51.5	-0.20323	-0.07151	0.0218	0.32164
51.75	-0.30012	-0.04468	0.05499	0.34474
52	-0.26854	-0.01637	0.00167	0.23167
52.25	-0.22491	0.09274	4.32847e-06	0.17009
52.5	-0.18513	0.09506	0.00736	0.16135
52.75	-0.24393	0.11997	0.02305	0.09849
53	-0.1713	0.09268	-0.05457	0.07839
53.25	-0.23572	0.08769	-0.03746	-0.00477
53.5	-0.21633	0.03099	-0.02401	-0.11953
53.75	-0.26706	0.04297	-0.0094	-0.13164
54	-0.23038	0.0027	-0.10021	-0.1466
54.25	-0.24121	-0.01638	-0.11933	-0.18443
54.5	-0.19595	0.01141	-0.08116	-0.2062
54.75	-0.24936	-0.0561	-0.08518	-0.24658
55	-0.21345	-0.09626	-0.09383	-0.35763
55.25	-0.23539	-0.11073	-0.07064	-0.34162
55.5	-0.24739	-0.12958	-0.07785	-0.40331
55.75	-0.2229	-0.10166	-0.11492	-0.4034
56	-0.23066	-0.19008	-0.12287	-0.41089
56.25	-0.23363	-0.20757	-0.12202	-0.41574
56.5	-0.22107	-0.16487	-0.11299	-0.46589
56.75	-0.23603	-0.15371	-0.1359	-0.40742
57	-0.25509	-0.16812	-0.12088	-0.32702
57.25	-0.24001	-0.17431	-0.1793	-0.31884
57.5	-0.21977	-0.10506	-0.11547	-0.36042
57.75	-0.17832	-0.10562	-0.167	-0.33668
58	-0.25028	-0.0885	-0.14805	-0.31348
58.25	-0.18055	-0.13589	-0.09901	-0.30868
58.5	-0.22904	-0.12772	-0.09388	-0.32137
58.75	-0.24385	-0.11399	-0.09827	-0.23992
59	-0.22577	-0.10653	-0.04691	-0.2753
59.25	-0.18753	-0.17335	0.01672	-0.29336
59.5	-0.17128	-0.0881	0.01213	-0.24962
59.75	-0.12253	-0.13946	-0.02934	-0.24841
60	-0.12478	-0.10943	0.01689	-0.18664
60.25	-0.10813	0.000275604	0.05302	0.01333
60.5	0.03647	0.23544	0.09652	0.19129
60.75	0.32289	0.47528	0.11171	0.40347
61	0.56862	0.71931	0.10728	0.47041
61.25	0.86084	0.89212	0.09468	0.56355
61.5	0.97422	1.05644	0.06675	0.7052
61.75	1.00248	1.1319	0.04277	0.6527
62	0.95685	1.00502	0.000371619	0.57367
62.25	0.85117	0.94797	0.04455	0.48379
62.5	0.80423	0.82597	-0.01921	0.42361
62.75	0.66127	0.7232	0.05547	0.35202
63	0.55336	0.56353	0.0195	0.23139
63.25	0.44555	0.5521	0.000196592	0.12731
63.5	0.2719	0.3944	-0.04404	0.07571
63.75	0.16758	0.33689	-0.04127	0.04832
64	0.06244	0.17954	-0.02392	-0.11968
64.25	0.01271	0.09132	0.01267	-0.1696
64.5	-0.14475	-0.09138	0.03436	-0.30867
64.75	-0.22878	-0.1623	0.03894	-0.31081
65	-0.32394	-0.25296	0.07062	-0.34439
65.25	-0.36063	-0.38885	0.03767	-0.38006
65.5	-0.33799	-0.33211	0.01377	-0.35589
65.75	-0.40658	-0.38973	-0.00494	-0.35092
66	-0.3788	-0.39552	-0.01488	-0.36113
66.25	-0.4111	-0.45011	-0.03216	-0.31806
66.5	-0.37861	-0.40896	-0.03708	-0.33482
66.75	-0.3317	-0.33613	-0.01891	-0.33702
67	-0.382	-0.3369	-0.04691	-0.23742
67.25	-0.32239	-0.33215	-0.0955	-0.29618
67.5	-0.36055	-0.38708	-0.03057	-0.29745
67.75	-0.36976	-0.39635	-0.08138	-0.3166
68	-0.40424	-0.37302	-0.06923	-0.36526
68.25	-0.34354	-0.36165	-0.06046	-0.29927
68.5	-0.34753	-0.34925	-0.00484	-0.26254
68.75	-0.3734	-0.37265	-0.01975	-0.26899
69	-0.32615	-0.3209	-0.0511	-0.29724
69.25	-0.29332	-0.36148	-0.04865	-0.25281
69.5	-0.33417	-0.37551	-0.06161	-0.23343
69.75	-0.31153	-0.3702	-0.03765	-0.24687
70	-0.28169	-0.38375	0.03297	-0.09455
70.25	-0.26845	-0.36725	0.04674	0.0882
70.5	-0.17633	-0.35947	0.07421	0.2736
70.75	-0.17998	-0.36554	0.02125	0.3469
71	-0.18702	-0.38644	-0.00406	0.38298
71.25	-0.14652	-0.33313	0.05556	0.36642
71.5	-0.26338	-0.31972	0.03677	0.2992
71.75	-0.22218	-0.23065	0.02509	0.26878
72	-0.24158	-0.26564	-0.00769	0.20474
72.25	-0.15624	-0.21923	-0.00471	0.1761
72.5	-0.18108	-0.24349	0.02803	0.13394
72.75	-0.25338	-0.2331	-0.02643	0.01085
73	-0.22264	-0.19189	0.08575	-0.09919
73.25	-0.22155	-0.23282	0.00217	-0.13292
73.5	-0.19132	-0.2605	0.00355	-0.17402
73.75	-0.23796	-0.23938	-0.05007	-0.23998
74	-0.22805	-0.22814	-0.01794	-0.28165
74.25	-0.25092	-0.32147	-0.05407	-0.26571
74.5	-0.23573	-0.27804	-0.07459	-0.30936
74.75	-0.20975	-0.19671	0.01782	-0.34316
75	-0.18215	-0.1975	-0.09158	-0.31799
75.25	-0.22078	-0.17532	-0.00735	-0.36629
75.5	-0.2342	-0.21911	0.019	-0.35645
75.75	-0.19845	-0.22275	-0.06774	-0.33875
76	-0.17018	-0.20088	-0.09749	-0.29411
76.25	-0.23752	-0.22923	0.03746	-0.25276
76.5	-0.19365	-0.15568	-0.01157	-0.25324
76.75	-0.17213	-0.14954	-0.01067	-0.28493
77	-0.20672	-0.21099	0.03494	-0.26244
77.25	-0.13861	-0.23767	0.06411	-0.31414
77.5	-0.14712	-0.19948	0.01246	-0.28741
77.75	-0.16519	-0.15802	-0.0551	-0.28828
78	-0.16554	-0.20562	-0.06452	-0.25524
78.25	-0.16274	-0.16682	-0.10219	-0.24361
78.5	-0.0725	-0.1422	-0.10983	-0.27937
78.75	-0.13434	-0.14914	-0.03522	-0.24083
79	-0.13048	-0.10137	-0.10129	-0.37934
79.25	-0.21382	-0.18029	-0.02784	-0.38295
79.5	-0.13159	-0.15736	-0.07219	-0.27263
79.75	-0.09914	-0.10552	-0.00308	-0.14981
80	0.03543	-0.18948	-0.01824	0.10917
80.25	0.34379	-0.19756	0.01154	0.31669
80.5	0.62074	-0.07417	-0.00342	0.42981
80.75	0.82781	-0.11647	0.03616	0.56607
81	0.96023	-0.0949	-0.04379	0.56211
81.25	0.9683	-0.09939	0.00908	0.4744
81.5	0.85572	-0.07107	-0.05127	0.442
81.75	0.79177	-0.10717	-0.01363	0.35664
82	0.74317	-0.12891	-0.00979	0.31011
82.25	0.59596	-0.12616	-0.03758	0.25117
82.5	0.47845	-0.0996	0.07846	0.22136
82.75	0.36288	-0.1709	-0.01004	0.0944
83	0.30584	-0.11805	0.03905	0.08724
83.25	0.15062	-0.18009	-0.01836	0.0313
83.5	0.08965	-0.18745	0.01813	-0.09274
83.75	-0.04179	-0.215	0.00628	-0.17446
84	-0.19088	-0.19899	0.01541	-0.24058
84.25	-0.24799	-0.20741	-0.01243	-0.271
84.5	-0.35381	-0.15892	0.07834	-0.32401
84.75	-0.33611	-0.12201	0.00325	-0.38993
85	-0.32195	-0.15795	-0.00337	-0.39699
85.25	-0.35333	-0.17813	0.01281	-0.2907
85.5	-0.3666	-0.15967	-0.0089	-0.30373
85.75	-0.36597	-0.14792	0.00945	-0.30066
86	-0.34782	-0.15181	-0.17175	-0.31945
86.25	-0.35991	-0.11481	-0.21266	-0.29955
86.5	-0.33843	-0.0936	-0.16608	-0.32161
86.75	-0.3682	-0.09621	-0.17611	-0.31097
87	-0.39975	-0.10406	-0.23953	-0.28502
87.25	-0.35006	-0.13479	-0.22162	-0.33403
87.5	-0.34055	-0.19734	-0.25502	-0.25853
87.75	-0.32345	-0.18866	-0.19463	-0.40314
88	-0.31514	-0.07053	-0.20633	-0.29999
88.25	-0.26948	-0.12536	-0.33568	-0.27514
88.5	-0.31955	-0.04401	-0.26985	-0.25127
88.75	-0.33491	-0.17516	-0.26807	-0.32529
89	-0.34933	-0.08826	-0.30658	-0.27548
89.25	-0.27368	-0.12675	-0.30552	-0.22174
89.5	-0.29453	-0.17284	-0.2068	-0.09016
89.75	-0.37798	-0.0624	-0.17962	0.09496
90	-0.33447	-0.07713	0.04519	0.17532
90.25	-0.28669	-0.03658	0.16143	0.34818
90.5	-0.2582	-0.04111	0.54528	0.46952
90.75	-0.29145	-0.06963	0.81085	0.61586
91	-0.16096	-0.03057	1.0461	0.67842
