# Supplementary material for: Corticothalamic gating of population auditory thalamocortical transmission in mouse
Source: eLife. 2021 May 24;10:e56645. doi: 10.7554/eLife.56645 (PMC8186908; doi:10.7554/eLife.56645)
Supplement: Figure 4—source data 7. [file elife-56645-fig4-data7.xlsx]

## Sheet: Figure 4K
		Count of cortical responses
Injection	Experiment Date	CONTROL		Gabazine_MGB		Wash		Gabazine_Cortex				The percentage of ON cortical responses
Injection in MGB first		ON	OFF	ON	OFF	ON	OFF	ON	OFF			Control	Gabazine_MGB	Wash	Gabazine_Cortex
	2017-06-21	8	2	10	0	5	5	10	0			80	100	50	100
	2017-06-22	3	7	10	0	8	2	7	3			30	100	80	70	Fig. 4I
	2017-04-25	4	6	10	0	2	8	1	9			40	100	20	10
		2	8	9	1	2	8	2	8			20	90	20	20
	2017-05-02	6	4	10	0	3	7	5	5			60	100	30	50
Injection into AC first	2020-06-30	6	4	10	0	6	4	10	0			60	100	60	100
	06/29/2020 (animal 2)	1	9	8	2	4	6	6	4			10	80	40	60
	06/29/2020 (animal 1)slice1	4	6	10	0	7	3	5	5			40	100	70	50	Fig.4J
