# Supplementary material for: Corticothalamic gating of population auditory thalamocortical transmission in mouse
Source: eLife. 2021 May 24;10:e56645. doi: 10.7554/eLife.56645 (PMC8186908; doi:10.7554/eLife.56645)
Supplement: Figure 5—source data 1. [file elife-56645-fig5-data1.xlsx]

## Sheet: Figure 5A, B, and C
			Figure 5B_data source 1				Figure 5C_data source 1: was made using the data from 5A and B
	ON (IPSCs)	OFF (IPSCs)		ON (EPSCs)	OFF (EPSCs)
Cell 1	16.7301	18.1599		30.5625	30.5625
Cell 2	12.9876	11.5249		10	23.9197
Cell 3	77.94	30.8299		10.6626	9.22461
Cell 4	29.75	191.157		6	6
Cell 5	15.4889	1.84961		5	4.71429
Cell 6	78.3358	36.9502		6	6
Cell 7	17.2749	16.4751		10.3333	10.6667
Cell 8	3.94987	4.05005		10.6667	10.5
Cell 9	98.1248	212.687		20.5	19.5714
Cell 10	12.75	6.6		15	15.1667
Cell 11	11	6		14.6	13.5
Cell 12	9.75	10.4		19.875	19.5
Cell 13	14	17.5		7.2	7.5
Cell 14	146.147	135.157
Cell 15	11.6667	17.5
Cell 16	10.25	10.8
Cell 17	14.5	4.28571
Cell 18	56.25	52
Cell 19	22	22
Cell 20	13	12
