# Supplementary material for: Corticothalamic gating of population auditory thalamocortical transmission in mouse
Source: eLife. 2021 May 24;10:e56645. doi: 10.7554/eLife.56645 (PMC8186908; doi:10.7554/eLife.56645)
Supplement: Figure 5—source data 2. [file elife-56645-fig5-data2.xlsx]

## Sheet: Figure 5E
ON- responses (Df/f)
Time (s)	Cell#1	Cell#2	Cell#3	Cell#4	Cell#5	Cell#6	Cell#7	Cell#8	Cell#9	Cell#10	Cell#11	Cell#12	Cell#13	Cell#14	Cell#15	Cell#16	Cell#17	Cell#18	Cell#19	Cell#20	Cell#21	Cell#22	Cell#23	Cell#24	Cell#25	Cell#26	Cell#27	Cell#28	Cell#29	Cell#30	Cell#31	Cell#32	Cell#33	Cell#34	Cell#35	Cell#36	Cell#37	Cell#38	Cell#39	Cell#40	Cell#41	Cell#42	Cell#43	Cell#44	Cell#45	Cell#46	Cell#47	Cell#48	Cell#49
0	0.01135	-0.09201	-0.47182	-0.79249	-0.20423	-0.11082	-0.67713	-1.0549	-0.55662	0.20676	-0.57497	-0.03345	4.45766	-0.13099	0.63772	-0.6554	-0.68766	0.31983	-0.04709	-0.77453	-1.45508	-0.05131	-0.07094	-0.8385	-0.4306	-1.23626	-0.79118	-2.21551	0.46356	-0.62122	-0.49148	-1.40264	-0.44632	-0.95784	-3.02638	0.58312	-0.68848	0.07647	0.22716	-0.65316	1.27847	-0.84792	-0.40803	-0.03992	0.89224	2.73203	-0.96181	-0.63215	-0.92897
0.1	-0.45608	-0.46536	-0.34002	-0.56629	-1.20305	-0.16523	-0.52168	-0.89736	-0.64444	-0.99712	-0.20588	-0.79738	4.57755	-0.25134	-0.31676	-0.60866	-0.21028	-0.50423	-0.29918	-0.29825	-1.32666	0.69344	0.9036	-0.25509	-0.91371	-0.17178	-0.1672	-1.50738	0.18072	0.30261	-0.03893	-1.08973	-1.04565	-0.41869	-3.26055	0.26973	-0.45379	0.29578	0.53228	-0.86919	0.09672	-0.43316	-0.01631	0.18549	0.69806	1.1273	0.92129	0.20695	-0.99408
0.2	-0.3717	-0.256	-0.45374	-0.3536	0.3709	0.09972	-0.66249	-1.27815	-0.44061	-1.1243	-0.72693	0.11912	4.29273	-0.12784	-0.1343	-1.06845	-0.69835	-0.1916	0.44169	-1.28241	-1.57906	-0.70047	-0.03461	-0.68414	-1.54249	-1.20095	-0.05534	0.26343	-0.58204	-1.27158	-0.24675	-1.4074	0.04266	-1.27834	-3.97182	0.1557	-0.38422	0.26184	-0.10456	-0.63926	-0.81158	0.38953	-0.45009	0.80252	0.16689	1.22341	-0.02634	-0.20496	-0.93451
0.3	0.25409	-0.2554	-0.22689	0.12973	-0.97801	0.41608	-0.57941	-0.69938	-0.36083	-0.3386	-0.0356	-0.09763	3.53073	-0.4713	-0.67335	0.04534	-0.61246	-0.54524	-0.26274	-1.19813	-1.68335	0.86569	0.13304	-0.79154	-0.53034	-0.97332	-0.92072	-1.54639	1.47748	0.95952	0.08005	-0.13219	0.67128	-0.65787	-3.76119	-0.52442	-0.62828	-1.02981	-0.28624	-0.90107	-0.02107	-0.20066	0.776	0.15323	0.4201	1.65876	-0.05638	0.06899	-0.86862
0.4	-0.27414	-0.38995	-0.2562	-0.06642	-0.20723	-0.31428	-0.16461	-1.716	-0.52214	-0.09542	0.41081	-0.20832	4.31887	0.33264	-0.26045	-0.62073	-0.14635	-1.52075	-1.17566	-0.55072	-2.21414	-0.37031	-0.25847	0.14453	0.76831	-0.26056	-0.35453	-0.05303	0.0905	1.72339	-0.94964	-2.95783	0.26262	0.02741	-4.0902	-0.07647	0.10006	-0.35727	0.4373	-0.70064	0.04128	0.02199	0.05803	0.17858	1.72048	2.29237	-0.19598	-1.28506	-0.28222
0.5	-0.66411	0.01773	-0.11568	-0.47019	-0.25188	-0.06886	-1.26222	-0.4528	0.01086	-0.70645	-0.25765	-0.43905	4.03177	-0.37381	-0.34062	-0.32617	-0.28852	0.04471	0.3467	-0.54408	-0.90781	-0.23868	-0.02647	-2.02841	-0.81302	0.03548	-0.9833	-0.0152	1.20081	0.13687	-1.01547	-2.01648	-1.24618	-0.75419	-2.54704	-0.04053	0.07358	-0.06378	0.13926	-0.44077	-1.28802	0.94381	0.64843	0.07917	1.77119	1.21345	0.75364	-1.25325	-0.03321
0.6	-0.24887	-0.20183	-0.26045	-0.565	-0.4751	-0.22744	-0.88739	-0.59615	-0.22711	-0.52479	-0.70046	0.07253	3.72936	-0.63326	-0.73586	-0.4909	-0.22884	-0.92881	-0.74792	-0.6496	-1.51729	-0.08081	0.01984	-1.05758	-0.9724	0.46674	-1.02606	0.41144	-1.22698	0.09552	-0.35184	-1.03167	-0.93311	-0.32494	-3.67791	0.17	0.19025	-0.35594	0.18168	-0.45738	0.28934	-1.11138	-0.16774	0.88819	0.80379	1.90894	0.72999	0.10331	-0.23821
0.7	-0.11902	-0.46459	-0.15145	-0.60618	-0.23171	0.02487	-1.18005	-0.55866	0.44188	-0.163	-0.09213	-0.33393	3.73121	-0.92431	-0.58666	-0.27935	0.07562	-1.08856	-0.16098	-0.782	-1.93461	0.23586	-0.1994	0.16982	-0.37135	-0.32251	-0.0257	-1.16983	-0.95669	0.22178	-0.67053	-1.10583	-0.56776	0.52141	-4.31107	-0.37068	-0.13942	0.19376	-2.0154	-1.0814	1.46265	-0.5665	-0.02167	0.62331	0.90067	2.17216	0.09533	-1.24501	-0.14915
0.8	-0.38569	-0.30562	-0.09631	-0.29119	-1.19274	0.07339	-1.22659	-0.9577	0.13727	-0.19846	-0.20402	-0.02098	3.60333	-0.53706	-0.1951	-0.4696	-0.57358	-0.30446	0.25913	-0.5794	-2.23908	-0.49441	1.09316	-0.20019	-1.07406	0.0286	-0.62176	-0.94299	0.19376	1.65453	-0.57865	-1.34624	-1.05845	-0.63198	-3.50958	-0.13066	-0.05171	-1.28181	-0.67425	-0.97927	-0.43844	-0.93289	0.00378	0.00525	0.84786	1.88615	0.65336	-0.92747	-0.42566
0.9	-0.24291	-0.17815	-0.34929	-0.32584	-0.74397	-0.3723	-0.61209	-1.47726	-0.23218	-0.47193	0.15583	-0.52461	2.79166	-0.54432	-0.64892	-0.46543	-0.61191	-0.42961	-0.49203	-0.87886	-1.92666	-0.71413	-0.40736	0.51644	-0.95052	-0.17478	0.26636	-0.78854	-0.75079	-0.97703	-0.69705	-1.50803	1.42363	-0.31495	-3.63631	-0.77907	-0.34439	0.02221	-1.14446	-0.32798	-0.53452	-1.61879	-1.44988	-0.32628	0.04167	1.66193	0.90326	-0.69886	-0.75484
1	-0.05744	-0.31384	0.00395	-0.80101	-0.15702	0.05563	-0.57742	-0.46884	-0.49721	-0.17289	-1.03487	0.35215	3.14178	-0.34209	-0.24029	-0.71686	-0.36598	-0.41296	0.30958	-0.79579	-1.65734	-0.23967	-0.46719	0.67621	-1.73893	0.33034	0.41044	-1.1339	-0.20754	0.24268	-0.36833	-1.869	0.87183	-0.53285	-4.38134	-0.69476	-0.93918	0.36475	-1.01019	-1.08345	-0.40567	-0.96262	-0.53455	-0.75514	0.43769	2.42191	-0.62422	0.12999	0.05603
1.1	0.75211	0.35937	0.55276	0.73622	1.00283	1.10307	-0.86801	-0.03037	2.08278	0.74639	0.47388	1.02585	4.65148	0.45697	0.78505	0.8308	0.33777	0.6186	0.49316	0.20561	-0.71169	0.19834	1.90086	0.72816	-0.64095	-0.00309	0.11187	-0.03116	1.51976	1.10551	1.57799	-0.22119	0.3678	0.49318	-3.97166	1.22988	2.94354	0.21833	1.17504	0.87661	1.98992	1.58835	1.32025	1.325	1.55249	3.16166	1.0625	1.25358	-0.09935
1.2	2.60461	2.50878	1.56261	3.83903	3.55695	3.26913	1.916	1.38574	3.93392	3.84718	3.12119	3.26559	5.25972	2.30483	3.13189	3.40062	2.60094	2.5782	2.77424	1.98929	1.10671	2.70824	2.83915	3.02843	2.16977	2.89905	2.32708	2.37335	1.94756	2.77026	3.08322	1.23481	2.7381	1.88838	-1.17078	3.32576	4.09165	2.95171	4.45278	4.35128	4.65202	4.32969	2.54628	2.94356	5.28194	3.19271	3.12725	3.70944	2.44392
1.3	3.58846	3.21955	2.56657	4.89671	3.88112	4.50106	2.62242	3.04271	5.17432	6.31969	3.66121	3.56474	6.38866	3.71782	3.83282	3.39442	3.37132	3.03052	3.19149	2.58668	1.41113	3.20818	2.48693	3.93443	3.10037	3.26477	2.16492	1.43579	0.85572	3.76807	2.09298	1.11765	4.38149	3.38286	0.42229	4.33765	4.79038	4.73081	3.8433	4.93038	5.06209	4.26301	3.87568	3.12707	6.11474	5.33619	3.14762	5.10786	2.11365
1.4	3.08734	3.18802	1.73409	3.42134	3.40463	3.71819	1.45123	1.84884	3.82552	5.36714	3.3009	4.02411	4.91003	2.76314	3.63765	2.48378	2.40751	3.31346	2.61118	2.28464	1.17942	4.21459	3.7497	2.99643	2.52635	2.39162	2.36136	3.15204	2.86922	2.04625	1.90067	1.46551	3.33394	3.14923	-0.72356	3.01913	3.85263	3.91818	4.34841	3.58033	3.21084	2.21863	2.76347	1.95458	6.07567	3.88751	2.62217	2.97924	1.97645
1.5	2.03045	2.87411	1.11566	2.40725	2.35003	2.95709	1.49458	1.58508	3.12583	4.01811	2.24018	2.40641	4.45088	2.13863	3.12246	2.2028	1.07343	2.32307	1.92294	1.53187	0.16533	3.10065	3.48743	1.79282	2.19051	1.9144	3.00658	1.3519	4.32543	0.11285	-0.07591	0.49237	1.81447	2.05559	-2.55327	2.31067	2.00382	2.05453	3.02736	3.38508	3.49011	3.1584	2.50604	3.31357	3.40906	2.57557	2.01481	2.41775	2.72669
1.6	1.94606	1.94511	0.88718	2.28487	1.79825	2.07578	1.06285	1.00205	2.78032	3.2689	1.53905	2.16209	4.16889	2.38236	2.1665	2.03135	1.52661	1.09117	2.47687	1.01674	0.76028	2.61245	1.69593	1.54231	1.06531	1.86949	1.26792	-0.32783	1.85525	1.96839	1.42342	0.62956	2.28675	2.01001	-2.88433	1.60786	1.1576	2.26082	1.93648	2.2969	2.05159	2.56549	2.1099	1.76542	3.61997	3.98877	1.72804	0.86074	0.60528
1.7	1.56203	2.31086	1.65573	1.63849	1.99664	2.01372	1.01398	0.85326	1.67679	2.24061	2.19799	0.82518	3.1527	1.07907	0.95387	1.26372	1.11119	1.35807	1.38824	0.61851	-0.31963	1.45783	1.74152	0.73209	1.41833	1.94925	1.63924	0.37462	1.43039	0.32033	1.21244	-0.75069	1.74036	0.39987	-3.40732	2.0489	1.68375	0.95666	1.74958	1.88464	3.19932	1.42038	1.45248	2.51157	1.73762	1.59258	0.92749	1.76077	1.00783
1.8	0.93182	1.26105	0.36256	1.22106	1.83532	1.51556	0.81976	0.19908	1.36624	2.07691	1.15664	0.96584	3.06535	0.96688	1.66313	1.29873	0.7407	1.00621	0.19664	0.59627	0.27171	0.17981	1.53779	1.00997	-0.20326	0.93015	0.48867	0.46464	1.54479	3.12474	-0.45782	0.10652	1.69003	1.23505	-3.93633	1.74736	1.74014	1.10558	1.3314	1.15247	1.77365	2.19861	1.49281	2.52679	2.61644	1.26898	0.57434	1.81823	2.01921
1.9	0.3737	1.41328	0.32858	0.79753	1.11515	1.08986	0.87996	-0.67249	1.24024	2.55919	1.34114	0.57225	2.284	0.75192	1.06553	0.79884	0.71572	-0.14738	-0.10873	0.60336	-0.28242	0.67456	0.83437	0.42653	-0.24305	1.06769	0.99464	-1.94933	2.94261	0.40784	0.39482	-0.93035	0.27987	-0.0271	-3.34045	0.69199	0.72169	1.84331	1.48131	0.62117	0.49758	1.14502	1.30859	1.71927	2.25687	2.36502	1.32474	0.94509	0.42775
2	0.25077	1.4136	0.63544	0.62915	0.47351	0.58981	0.45833	0.34236	1.42269	1.89289	0.83742	0.60729	1.78715	0.31656	1.19632	1.23773	0.30791	-0.29232	-0.39583	0.43482	-1.01093	0.70225	1.36028	0.96653	1.37263	0.47766	0.38681	-1.53541	0.67523	1.85637	-0.22755	-0.61972	-0.07208	1.11196	-3.53269	1.05718	0.4704	0.00603	1.01887	1.43381	-0.09672	0.69112	2.23674	0.34576	2.19729	1.97074	0.07851	2.64135	0.98215
2.1	0.32563	1.50415	0.11022	0.86744	0.89436	1.18818	-0.13103	-0.20174	0.97348	1.583	0.40246	1.14601	1.59919	1.12066	0.38615	0.67002	0.53761	0.43605	0.50389	-0.000415076	-0.55833	0.52845	1.35003	0.63785	-0.05949	0.58586	0.66971	0.51657	0.02395	0.35903	-0.09028	-1.67135	0.00913	0.57841	-4.35188	0.3502	0.00181	0.52421	0.40714	0.3075	0.394	1.50503	1.06314	0.75266	2.54471	2.73908	-0.34318	0.32031	-0.03966
2.2	0.23644	0.95745	0.16516	0.26883	0.46561	0.90182	-0.64565	0.13371	0.65588	1.1982	0.55058	-0.25174	1.81584	-0.16799	0.6551	0.21949	0.05243	0.21837	0.85661	0.38357	-1.10365	0.26683	1.12048	0.73828	-0.80234	-0.46596	0.31603	-0.64303	0.43878	0.37622	-0.41637	-1.4313	0.42731	-0.10045	-4.73965	0.90378	0.78986	-0.12718	0.29804	0.35046	-0.04237	-0.34164	0.26017	0.73645	0.78441	1.24514	-0.00632	1.52247	-0.08894
2.3	-0.23529	1.02051	0.32809	-0.08032	0.22865	0.19601	0.28738	0.00959	-0.28977	0.85697	0.19294	-0.37431	1.03379	0.01123	0.31729	0.41655	0.72957	0.04162	-0.41707	-0.33896	-0.91964	-0.00837	0.64982	-0.13724	0.3911	0.22283	0.05755	-0.44495	1.06214	-0.67698	-0.45145	-0.89864	0.04614	0.58799	-4.80614	-0.53132	0.25054	1.15694	0.27091	0.44298	0.36404	-0.17965	0.83323	0.4511	1.1328	2.01179	0.84463	0.67428	0.25103
2.4	0.08023	0.89351	-0.1352	0.58861	0.73034	1.28062	-0.10163	-0.54271	-0.46889	0.95336	0.4456	-0.22395	0.73856	0.4552	-0.12437	-0.06407	0.18019	-0.53244	0.00861	-0.40721	-1.17231	0.924	-0.10799	0.24855	-0.64986	0.4894	0.02458	-1.88809	0.03984	0.01791	0.22568	-0.05243	-0.31199	0.80767	-4.74841	0.02681	0.35487	-0.53936	-1.62068	0.25956	-1.11835	-0.59023	0.58734	-0.13095	1.8044	1.62952	-0.40607	0.52947	0.45383
2.5	-0.27113	0.66683	-0.11237	0.38996	-0.16481	0.20605	0.43838	0.20934	-0.12084	1.06881	0.11309	-0.15058	0.03545	-0.13246	0.70462	0.55756	0.1515	-0.26624	0.32211	-0.46081	-1.68095	0.56591	0.34024	0.33808	-0.28905	1.00836	-0.32665	0.44561	-1.34652	1.00384	-0.50726	-0.91228	-0.27671	0.04166	-4.49333	-0.5012	0.76769	0.01717	-1.33423	-0.1345	0.41303	0.05828	0.1161	-0.37255	1.07524	1.10485	0.77811	0.07483	-0.31205
2.6	-0.06543	0.84591	-0.3124	-0.25833	-0.71666	-0.219	-0.56456	-0.74198	0.22468	0.56367	0.22868	-0.54061	0.51389	0.69391	0.1241	0.05043	0.17774	-0.60029	-0.07245	-1.22547	-1.26019	-0.5952	0.04608	-0.57899	-1.03115	0.42456	-0.18876	-1.47368	1.73343	0.43469	-0.84152	-0.60194	-0.16084	-0.37588	-5.3645	0.10175	-0.24091	0.35353	-1.32339	-0.65318	0.10724	-1.0467	1.07774	0.78867	2.50771	0.60384	-0.41836	-0.32743	-0.09232
2.7	-0.15051	0.3671	-0.23704	-0.45615	-0.10813	0.09662	-0.55534	-0.43745	-0.08645	0.49551	-0.15914	-0.22941	0.11444	-0.1595	0.15391	-0.14061	0.76762	-0.69498	-0.39678	-0.47991	-1.66214	-0.36613	0.11223	1.55754	0.12972	-0.28243	1.09208	0.23214	0.49348	1.94849	-0.8114	-0.47735	-0.11348	-0.49972	-4.65084	-0.02504	0.20809	0.67387	-2.02941	-0.38882	-0.69675	-0.28255	0.46829	0.74297	2.34905	0.63808	-0.47631	-0.09838	-0.30554
2.8	-0.16875	0.36611	-0.3476	-0.186	0.13787	-0.13255	-1.37049	-0.56523	-0.02633	-0.27046	-0.28618	-0.41637	-0.44024	-0.25985	0.16445	-0.22012	-0.76135	0.43557	-0.01623	-0.79352	-1.79479	0.26522	-0.45053	0.01878	-0.43596	0.62591	0.45597	-0.14729	-0.64512	1.19085	0.53344	-0.43773	0.09526	-0.18746	-4.78259	-0.41252	-0.15566	0.21976	-0.73293	-0.85725	0.85316	-1.07041	0.86959	0.39978	2.32733	0.9887	0.02491	-0.22327	-0.45095
2.9	-0.38036	-0.07493	-0.37559	-0.39794	-0.60536	-0.2851	-1.24012	-0.74017	-0.79126	-0.12436	-0.37445	-0.7287	0.02482	-0.26395	0.16955	-0.71699	-0.48224	-0.47325	-0.3261	-0.87417	-1.18696	0.27161	1.04236	-0.00282	0.51885	-0.15015	-0.09803	-1.32062	-0.31686	0.85548	-0.36426	-1.06843	-0.66555	0.83159	-5.06127	-0.40989	-0.74892	-0.3858	-1.66429	-0.56337	0.23072	-1.31044	0.23498	0.03035	1.52665	2.77819	-0.446	-0.30553	0.40923
OFF-responses (Df/f)
Time (s)	Cell#1	Cell#2	Cell#3	Cell#4	Cell#5	Cell#6	Cell#7	Cell#8	Cell#9	Cell#10	Cell#11	Cell#12	Cell#13	Cell#14	Cell#15	Cell#16	Cell#17	Cell#18	Cell#19	Cell#20	Cell#21	Cell#22	Cell#23	Cell#24	Cell#25	Cell#26	Cell#27	Cell#28	Cell#29	Cell#30	Cell#31	Cell#32	Cell#33	Cell#34	Cell#35	Cell#36	Cell#37	Cell#38	Cell#39	Cell#40	Cell#41	Cell#42	Cell#43	Cell#44	Cell#45	Cell#46	Cell#47	Cell#48	Cell#49
0	0.32693	0.07995	-0.49971	-0.30278	0.43246	-0.03349	-1.27208	2.00354	-0.66787	-0.51603	-0.24636	-0.31331	-0.7691	-0.62204	-0.61885	-0.47095	-0.51397	0.43494	-0.29005	0.02216	0.76268	0.82386	-0.81871	0.83912	-0.48112	0.38801	1.71002	1.57938	0.7385	2.03706	-0.76223	0.48651	-0.60294	-0.59733	0.05008	-0.60976	-0.35185	-1.03114	0.32906	-0.57873	-0.55989	-0.22146	-0.10104	3.2849	-1.12515	-0.5777	-0.06407	-0.2093	-0.02396
0.1	0.26261	-0.52701	-0.2592	0.21861	0.36801	-0.33495	-0.93774	2.62329	-0.15945	-0.48368	-0.08703	-0.51111	-0.33545	-1.11352	0.08511	-0.86709	-0.27623	-0.71959	-0.82232	-0.53454	-0.07437	0.31101	-0.42511	-1.17125	-0.15277	-0.15939	-0.20412	0.04171	0.75994	1.10356	-0.46723	-0.55566	-0.10014	-1.52356	0.21909	-0.12072	-1.10824	-0.67245	-0.11531	-0.1229	-0.78089	-1.11408	-0.49877	2.93649	-1.20593	-1.30307	0.45907	1.15899	1.24191
0.2	0.13195	-0.53409	-0.12144	-0.09158	0.94975	-0.44903	-0.33565	2.10711	-0.03217	-0.3417	0.17237	-0.48398	0.0842	-0.54201	-0.54527	-0.458	-0.16213	-0.19852	0.41384	-0.37569	0.38003	0.6029	-0.56506	-0.42424	-1.04039	1.25512	0.52513	-0.19222	1.37857	-0.59759	-0.67961	0.83956	0.13159	-0.41829	-0.44461	-0.27276	-0.53717	-0.60897	0.14311	-0.03224	0.02447	0.6599	-0.17806	2.56292	-1.13714	-2.12463	-0.64695	0.48346	-0.12722
0.3	0.04813	-0.64502	0.13806	-0.27122	0.02225	0.20426	-1.55401	1.02257	-0.1769	-0.41945	-0.1319	-0.52504	-0.12236	-1.317	-0.893	-0.42699	-0.12618	-0.02725	-0.91538	0.27328	0.169	0.51235	-1.13892	-0.91913	0.26486	0.12363	-0.23	2.34476	-1.03911	0.26073	-0.09424	-2.00744	0.81401	-0.8847	-0.88662	-0.15159	-0.22472	0.12964	-0.54899	-0.39165	-1.32405	0.35753	-0.56163	2.4976	-0.42104	-0.38965	-0.84858	-0.43914	1.04442
0.4	-0.26431	-0.50163	-0.38816	-0.66387	0.61052	-0.25984	-0.81401	1.666	-0.95308	-0.46319	0.45788	0.02244	-0.56787	-0.83589	-0.02466	-0.56995	-0.06119	0.07546	-2.12802	-0.87859	-0.22538	-0.77581	0.74518	0.09127	-1.71273	-0.15595	0.4671	1.20538	0.63591	-1.62618	-0.22021	-1.86255	-0.56075	-1.20456	-0.89944	0.20714	-1.303	-1.23744	-0.25746	-0.86528	-1.65061	0.20259	0.54538	3.12206	-0.99046	-2.49394	-1.95144	0.11392	1.20203
0.5	0.37918	-0.78327	0.28365	-0.66239	0.74902	-0.53547	-0.83854	2.38898	-0.19278	0.04259	0.09385	-0.21421	-0.07212	-1.24897	-0.23095	-0.59446	-0.27216	-0.1171	-0.44849	-0.05719	0.12588	0.12595	-0.51865	-0.56553	-0.1652	0.38841	-1.30313	1.85094	0.23655	0.38418	0.33256	0.24941	0.65074	-0.26006	-1.14344	0.15928	0.33119	-0.48398	0.19797	-0.19966	0.70279	0.27838	-0.10906	3.19831	-1.4487	-0.96258	-0.51242	-0.81665	-0.1753
0.6	-0.20192	-0.77055	-0.09806	-1.20882	0.40648	-0.81236	-0.42591	1.98424	-0.36786	-0.13494	-0.05509	-0.50948	-0.34025	-1.30951	0.27143	-0.30045	0.11186	-0.33606	-0.05205	0.3453	-0.29966	-0.72176	-0.26795	0.2516	0.39615	0.50838	0.06922	1.12773	1.029	1.34806	0.58616	0.00596	0.18793	-1.41619	-0.31469	0.07596	-0.55791	-1.31549	-0.0014	-0.28573	-0.41499	-0.28372	0.02395	3.23547	-1.40634	-1.02595	-0.61073	-0.000446462	0.21018
0.7	-0.26461	-0.62736	-0.25757	-0.83929	0.30557	-0.0774	-1.14261	1.54617	-0.33774	-0.48401	0.53418	-0.41393	-0.60997	-1.03319	0.28891	-0.2784	-0.58665	-0.17932	-0.6572	-0.03207	0.29802	-0.11552	-0.38882	-0.38734	-0.14013	-0.06705	-0.58288	1.09923	-1.25019	-0.43499	0.18747	0.3057	0.76457	-1.34376	-0.85921	-0.39269	-0.33248	-0.09363	-0.29514	-1.10959	-1.71985	1.73922	0.18579	2.4962	-1.96306	-0.45653	-0.98616	0.61472	0.876
0.8	0.17929	-0.30527	-0.1302	-0.4985	-0.59771	0.24782	-0.41432	1.2707	-0.52331	-0.89537	-0.35953	-0.80663	-0.09854	-0.84005	0.13892	-0.10707	0.15207	0.40191	0.21484	0.27624	-0.36741	-0.29723	-0.42257	-0.1985	-0.28494	0.54237	0.95052	1.18574	-1.38767	0.00145	0.46769	-1.02759	0.26874	-0.95721	-0.77155	-0.1716	-1.08987	-0.39999	-0.24439	-0.35041	0.03487	-0.2851	-0.49623	2.14886	-0.27947	-1.6952	-2.15427	-0.19438	0.89733
0.9	-0.1519	-0.51065	0.06027	-0.33829	0.3474	-0.3421	-0.59332	1.63459	-0.45116	-0.94154	-0.45037	-0.45639	-0.74007	-1.24711	-0.28916	-0.61749	-0.23731	-1.07943	-1.44682	-0.04551	0.12927	-0.67799	-0.31971	-1.57904	-1.19766	0.2596	1.21662	1.36078	0.06836	2.72559	-0.28186	-1.29894	-0.14027	-1.38233	0.1612	0.32607	-0.90058	-1.64935	0.04463	0.08063	-0.80543	-0.05744	-0.42174	1.46392	-2.14504	-2.59635	-0.87021	0.18013	0.74874
1	-0.29125	-0.11405	0.00512	-0.23066	0.9646	-0.82512	-1.66041	1.32485	0.05827	-0.7815	0.06376	-0.33489	-0.40262	-0.55733	-0.40371	-0.30345	-0.31678	-0.15282	-0.90741	-1.05899	-0.04269	-0.48505	0.19925	-1.40311	-0.41587	-1.59806	-1.65758	2.09737	-1.735	0.33895	-1.38155	-0.79782	2.07578	-1.36078	-1.4415	-0.65791	-0.74076	0.1184	-0.10135	0.16697	-0.8414	0.78813	-0.51645	0.5623	-1.69132	-0.80027	-1.54712	-0.34072	0.7608
1.1	0.64373	0.79214	0.16177	0.85275	0.87817	1.28938	0.20534	1.9109	1.3244	0.7342	0.8596	0.00643	1.09882	0.27126	1.30394	0.38986	0.31724	0.54587	0.30364	0.53277	0.79377	0.42286	0.29974	1.17123	0.6328	-0.46094	1.40706	2.55551	0.30689	1.61222	-0.33453	1.74402	0.62617	-0.15772	0.40878	1.16076	1.43785	1.08775	0.89306	1.40475	2.27128	2.38644	1.22308	2.63921	0.9214	-0.57455	0.38358	-0.66865	0.58734
1.2	2.77876	1.92697	2.04481	3.64005	2.85869	2.98804	1.64408	3.81058	3.84959	3.53428	3.12451	3.04599	2.7985	1.74252	3.05217	1.94993	2.60704	2.65189	2.11862	2.77527	2.82223	2.15393	2.69881	2.13845	2.70971	2.37504	2.22875	4.19499	3.28743	3.05191	1.1772	3.06955	2.40858	2.22948	2.18322	4.04143	3.9869	2.77016	3.52228	4.41924	3.59525	4.90317	3.03808	3.80993	4.27837	1.83556	2.62624	1.82476	2.25212
1.3	3.74588	2.7237	2.42167	4.78311	4.00258	4.57671	2.35388	3.65206	4.58756	4.84643	3.60521	3.44477	2.7267	3.04438	3.70025	3.36888	2.85741	3.03945	1.16161	3.10699	3.39613	2.76004	2.45941	3.24885	2.71853	3.5607	2.10296	3.94736	2.14548	5.25107	2.79113	3.97665	4.34339	2.15996	2.40185	3.7842	4.13875	4.60804	5.11704	5.0831	4.6771	5.22117	3.01652	5.65247	1.70942	2.47495	3.15501	3.67106	3.40535
1.4	2.98175	3.27676	1.84572	3.3626	3.70894	3.77511	1.70256	4.02286	3.80856	4.18427	3.04089	2.46502	2.27694	2.07931	3.30304	3.00198	2.02758	2.5464	2.19595	2.68949	2.28888	1.99358	2.42534	2.17555	3.12823	2.7719	1.89808	5.42605	0.72657	2.51652	1.73246	1.65365	3.8263	1.63002	2.99666	3.42391	4.30174	2.50007	3.94912	4.14009	4.665	4.49729	2.95541	4.25636	1.63345	1.31824	0.57855	1.29869	3.04176
1.5	2.20744	2.29478	0.92331	2.1046	2.90068	3.00296	1.24442	2.94097	3.40053	4.0253	2.61324	2.20049	2.1302	1.43415	2.97107	2.5449	1.94062	1.52548	0.70321	1.63259	2.67374	2.29636	2.02037	1.53358	2.1974	1.52226	1.38344	3.12482	2.95679	3.47103	1.53867	1.76503	2.4627	0.86482	0.87946	2.32133	2.64145	1.77448	2.60856	2.34238	2.84554	3.98859	2.24683	3.09591	0.16647	0.57615	1.25096	1.2339	2.11138
1.6	2.2072	2.13642	1.14651	2.01289	2.84468	1.71214	1.83249	2.75445	2.99643	3.71891	2.09892	1.49229	2.02558	1.43962	2.35427	1.87156	0.75491	1.31726	0.66056	2.3751	1.86612	0.03208	1.36761	1.44788	1.40342	0.53275	1.83741	4.1856	2.0841	3.2256	1.04924	1.10984	2.20674	0.77404	1.5446	2.55776	2.38748	1.32601	2.78387	2.05484	2.65821	1.87256	2.05848	3.06827	1.46983	-0.59299	1.0872	1.67608	1.10434
1.7	2.0874	1.68497	1.07983	1.84523	2.41998	1.86473	0.72408	2.11759	2.50594	1.97669	1.62179	2.35806	1.15716	0.38554	2.40095	1.27298	1.43857	1.87098	0.2485	1.59024	1.76762	0.51594	0.40389	1.21822	0.48545	-0.68833	1.07044	2.7704	0.85469	3.15716	0.4041	0.05405	1.25957	0.62303	1.98892	1.97867	2.54993	1.36817	1.52207	3.29586	2.34477	3.4144	1.3241	1.98998	0.45353	-0.50913	0.71635	1.96719	2.40458
1.8	1.42485	1.53218	0.88884	1.54593	1.61026	1.50781	0.56843	2.00005	1.8868	2.552	1.57617	1.85661	0.96876	0.23702	1.63208	1.03829	1.14982	1.08908	1.21202	1.38827	1.04842	1.27737	1.35358	1.18888	0.54179	0.81857	2.68904	3.50406	1.14437	2.8494	1.00083	0.64665	1.12091	0.46552	1.15382	1.59256	1.82534	1.72436	1.65485	1.39498	1.06873	2.01526	1.24479	2.44492	-0.31123	0.26578	0.46365	2.39666	2.31812
1.9	0.87151	1.32117	1.16085	1.6434	2.50572	1.26608	0.41323	2.26304	1.15853	1.96191	0.90778	0.09384	1.29389	0.18878	1.67733	0.59386	0.80135	0.31592	-0.14175	0.90796	1.70865	0.14299	0.0391	0.86693	0.69348	0.80219	0.7821	3.77123	0.03826	3.09887	-0.36047	0.3811	1.23474	0.70004	0.69922	0.54166	1.02847	1.77127	1.08072	1.87681	1.53347	1.48751	1.00838	2.03377	-0.47822	-0.64179	0.71497	1.59804	1.9643
2	0.55936	1.30418	0.14692	1.4709	1.94179	0.58045	0.33139	1.89484	0.98257	1.90254	1.50907	0.60904	0.66377	0.05015	1.29051	0.68227	0.79956	0.10475	0.91086	0.4188	1.04495	0.126	0.22397	0.76879	0.56883	-0.35608	1.12288	3.61181	-0.29669	3.45647	-0.82188	1.85981	1.52834	-0.08227	-0.09128	1.80766	0.88368	2.81428	1.46664	1.44465	0.46689	1.72448	0.54966	1.77201	0.23985	0.17447	0.0678	0.11555	1.78217
2.1	1.08965	0.82948	0.07663	0.80598	1.62373	0.36017	-0.2499	2.695	1.26181	1.77538	0.23061	0.29375	0.57171	-0.2411	0.66019	0.3785	0.39055	0.78442	0.75903	0.58248	0.6635	0.00808	0.31239	0.50699	-0.34351	-0.31078	0.80979	2.07891	1.29757	1.57786	-0.24228	0.28383	0.8706	0.50344	0.28152	1.44869	1.14637	0.20121	1.75305	1.6096	1.67879	1.54781	0.33547	1.04512	-1.4222	-1.38095	1.04569	0.85168	1.28965
2.2	0.67806	1.30376	0.25344	0.32865	2.12631	-0.12247	0.05396	2.00611	0.33604	1.21205	0.25039	0.32016	0.60174	-0.92257	0.67961	0.37026	0.13256	0.93935	-1.49014	0.28896	0.81838	-0.45807	0.62134	-0.04954	-0.13342	-0.4029	1.14669	2.48258	-0.00523	1.11078	0.60854	-0.6094	0.59289	0.00571	-0.33276	0.52403	-0.18351	0.09852	-0.24983	0.72109	0.69484	0.67741	0.31744	0.79025	-0.93979	-1.11131	0.11088	1.2244	0.92978
2.3	0.77319	1.16774	0.86358	0.40837	1.56	0.37626	-0.21042	1.48163	0.65652	0.72204	0.31381	-0.30896	0.05315	-0.53523	0.74156	0.09046	0.09766	0.49734	0.30058	-0.11798	0.4955	0.01306	0.68762	0.63891	0.85546	0.00686	-0.40411	2.93398	-0.85007	1.38801	0.50772	0.5898	1.74429	0.15473	0.07041	0.73942	1.15516	-0.55565	0.25108	0.32851	2.16145	0.72833	0.40471	0.30582	-0.10065	-1.21672	-0.17459	-0.35471	0.88721
2.4	0.85856	0.73766	-0.15408	0.24447	1.0261	-0.01701	-0.19777	1.68918	0.15364	1.90599	-0.04746	0.25602	0.2688	-0.42812	0.37437	-0.14706	-0.23911	0.15518	-0.35549	-0.10475	0.09291	-0.35696	0.35079	-0.1843	0.61346	0.10628	-0.58229	4.01015	-0.69223	2.24511	-0.63574	-1.38028	0.62365	0.38415	0.45088	-0.1814	0.38933	-0.21321	-0.41857	0.98596	0.49364	1.50977	1.00644	0.21033	-1.53208	-0.00731	-0.44441	0.37047	1.19056
2.5	0.24773	0.54456	0.28206	0.06505	1.15366	0.16431	-0.29769	1.44014	0.38668	0.72447	0.32607	-0.08678	0.29946	-0.89194	0.35081	-0.2461	-0.44584	0.45905	0.4326	0.42572	0.48443	0.73292	0.16429	0.36227	-1.04125	-0.39494	0.41838	1.78496	1.59311	3.45447	0.47845	-0.17525	1.10513	0.39111	0.28453	0.5076	-0.88784	-0.22532	-0.18217	0.05978	0.83216	1.42265	0.08767	0.4203	-0.95686	-0.60478	-0.22295	0.16582	0.54959
2.6	0.39981	0.53504	-0.12893	0.39495	1.33579	0.62262	-0.46518	0.80773	-0.06407	0.12982	-0.45602	-0.80474	-0.62594	-0.43311	0.28957	0.32007	-0.24491	0.16594	1.14847	-0.28687	1.01081	0.21725	0.07073	0.6645	0.91777	-1.31913	0.6457	1.69921	0.71992	2.51039	0.48902	-0.31389	0.77286	-0.33021	0.65651	0.82658	-0.75088	-0.82419	1.08769	-0.34924	0.23777	0.84764	0.45696	0.72148	-0.28805	-1.21815	-0.81337	-1.30551	0.82362
2.7	-0.08786	0.46002	-0.24928	0.06137	0.47864	-0.39217	-0.62235	2.03521	-0.14093	0.31633	0.1042	0.07303	-1.3964	0.0521	0.19782	-0.28099	-0.48267	-0.1989	0.05611	0.01804	0.33321	0.82772	0.6808	0.60101	-0.09823	-1.11088	-0.68058	3.77663	-0.1646	0.53264	0.42074	1.31604	0.47539	-1.15069	0.14972	0.95448	0.3454	-0.34804	0.57307	-0.04085	0.1651	1.26983	-0.14535	-0.14604	-3.20418	-0.10003	-0.21318	0.84961	0.99537
2.8	0.17436	0.44202	0.211	-0.25067	0.62856	-0.06354	-0.8426	1.0238	-0.11096	0.33032	0.16946	-0.45743	-0.71449	-0.67614	0.49073	-0.63485	-0.37636	-0.33552	0.95865	-0.02668	0.51503	-0.08742	-0.04956	1.03791	-0.47493	-1.81417	-0.62382	2.51966	-0.72385	1.72844	0.06924	-0.45863	0.87181	-0.89591	0.2552	0.91053	-0.19358	-0.41688	0.1027	0.12966	0.92073	0.14714	-0.16179	0.3709	-2.01539	-0.91884	-1.66728	-0.27224	0.75584
2.9	0.08072	0.67046	0.30361	-0.35442	0.87028	-0.27507	-1.25548	0.61358	0.18348	0.04769	-0.659	-0.31819	-0.92102	-1.24331	0.76281	-0.56736	-0.02239	-0.66181	-0.57426	-0.10074	0.81504	0.39718	-0.52444	-0.41791	-0.54534	-1.83621	-0.5644	2.37329	-1.15234	1.59614	-0.19282	-0.52369	0.97633	-1.37151	0.61642	0.73352	-1.01415	-1.31881	-0.25978	0.00249	0.1166	-1.48441	-1.22892	0.57103	-1.43841	-1.33996	0.4715	0.70353	-0.13611
[truncated: 122 more columns]
