# Supplementary material for: Corticothalamic gating of population auditory thalamocortical transmission in mouse
Source: eLife. 2021 May 24;10:e56645. doi: 10.7554/eLife.56645 (PMC8186908; doi:10.7554/eLife.56645)
Supplement: Figure 5—source data 3. [file elife-56645-fig5-data3.xlsx]

## Sheet: Figure 5F
	ON	OFF
Paired response #1	5.06	8.1
Paired response #2	5.42	8.13
Paired response #3	4.04	4.66
Paired response #4	3.43	4.61
Paired response #5	0.564706	0.384314
Paired response #6	0.196078	0.964706
Paired response #7	1.35	0.384314
Paired response #8	1.21	1.36
Paired response #9	2.38	2.69
Paired response #10	2.37	5.98
Paired response #11	1.91	3.87
Paired response #12	2.72	2.18
Paired response #13	1.96	1.52
Paired response #14	2.73	3.11
