# Supplementary material for: Corticothalamic gating of population auditory thalamocortical transmission in mouse
Source: eLife. 2021 May 24;10:e56645. doi: 10.7554/eLife.56645 (PMC8186908; doi:10.7554/eLife.56645)
Supplement: Figure 6—figure supplement 1—source data 1. [file elife-56645-fig6-figsupp1-data1.xlsx]

## Sheet: Figure 6-figure supplement 1C
Time	Df/f (cortex)
(s)	Control	CNO	Wash
0.25	-0.181036	-0.0706362	-0.542071
0.5	-0.0504915	-0.14147	-0.555606
0.75	-0.101544	-0.0181585	-0.559975
1	-0.292722	-0.0553746	-0.543996
1.25	0.0142771	-0.0473118	-0.51278
1.5	-0.184518	-0.0778554	-0.302762
1.75	-0.17163	-0.0991819	-0.431128
2	-0.278814	0.0343177	-0.391204
2.25	0.0494993	0.00947158	-0.473006
2.5	-0.0634266	-0.0161481	-0.26724
2.75	0.00210826	0.0779035	-0.186432
3	0.00883727	-0.0157033	-0.133474
3.25	0.215984	0.121282	0.102513
3.5	0.428522	0.534906	0.567124
3.75	0.436094	0.704434	0.916403
4	0.769372	0.963797	0.943312
4.25	0.920727	0.905665	1.00777
4.5	1.34111	1.07808	0.848407
4.75	1.55771	1.09248	0.794543
5	1.58535	1.00988	0.940029
5.25	1.42529	0.788917	1.37494
5.5	1.40407	0.849469	1.24182
5.75	1.11137	0.83091	1.22146
6	0.970532	0.556157	0.991513
6.25	0.46289	0.416897	0.901084
6.5	0.277163	0.44204	0.665223
6.75	-0.0797302	0.261516	0.331071
7	-0.224697	0.104985	0.278772
7.25	-0.424742	-0.403563	-0.0162286
7.5	-0.48631	-0.243121	-0.564829
7.75	-0.815979	-0.466248	-0.696184
8	-0.850805	-0.566842	-0.814717
8.25	-0.939013	-0.416586	-0.767257
8.5	-0.870296	-0.395046	-0.827053
8.75	-1.08489	-0.495013	-0.54687
9	-1.00852	-0.584201	-0.512942
9.25	-0.834726	-0.291748	-0.313516
9.5	-0.731685	-0.309327	-0.353098
9.75	-0.762343	-0.122953	-0.22165
10	-0.695951	-0.313915	-0.246717
10.25	-0.652195	-0.275412	-0.326685
10.5	-0.633038	-0.563401	-0.257644
10.75	-0.676762	-0.392739	-0.32401
11	-0.50792	-0.486968	-0.361376
11.25	-0.522135	-0.334563	-0.386254
11.5	-0.5416	-0.286716	-0.226395
11.75	-0.48468	-0.334018	-0.285753
12	-0.382443	-0.41268	-0.237374
12.25	-0.420155	-0.284864	-0.269894
12.5	-0.440002	-0.173444	-0.2635
12.75	-0.448437	-0.263047	-0.330269
13	-0.238586	-0.109918	-0.349228
13.25	-0.0925659	0.327373	-0.0719809
13.5	0.205743	0.344473	0.319911
13.75	0.553984	0.538092	0.579211
14	0.827419	0.444926	0.904424
14.25	0.987512	0.312103	0.949854
14.5	0.993137	0.371943	0.928408
14.75	1.13185	0.0753017	0.712301
15	1.05421	-0.070296	0.667245
15.25	0.824874	-0.100614	0.321423
15.5	0.680745	-0.196849	0.134847
15.75	0.387717	-0.180422	-0.00387143
16	0.222175	-0.140788	-0.335854
16.25	0.0925872	-0.0405129	-0.24645
16.5	-0.203956	-0.201683	-0.373244
16.75	-0.37795	-0.106463	-0.24194
17	-0.375897	-0.0926987	-0.530432
17.25	-0.509158	-0.239173	-0.341235
17.5	-0.626111	-0.21062	-0.407315
17.75	-0.705292	-0.197487	-0.366089
18	-0.656711	-0.163467	-0.402495
18.25	-0.598455	-0.165527	-0.437622
18.5	-0.564426	-0.23043	-0.327026
18.75	-0.43598	-0.0931438	-0.424248
19	-0.430544	-0.131116	-0.105122
19.25	-0.475821	0.0281403	-0.227918
19.5	-0.389008	-0.0407888	-0.179628
19.75	-0.410792	-0.17183	-0.322589
20	-0.419316	-0.141869	-0.281524
20.25	-0.365872	-0.0216574	-0.158606
20.5	-0.364109	-0.222326	-0.303874
20.75	-0.255174	-0.318192	-0.152854
21	-0.405345	0.0434304	-0.0443315
21.25	-0.279861	-0.166445	-0.223322
21.5	-0.327801	-0.0401198	-0.0941109
21.75	-0.216232	-0.0513596	-0.142708
22	-0.232032	-0.02738	-0.0446204
22.25	-0.0542838	-0.0797062	-0.21086
22.5	-0.135209	0.00863686	-0.141377
22.75	-0.0354445	0.0545227	-0.0964763
23	-0.0184482	0.252052	-0.00107074
23.25	0.273285	0.532172	0.189054
23.5	0.519216	0.572179	0.019181
23.75	0.600104	0.769651	0.190201
24	0.607555	0.771325	0.0241897
24.25	0.571542	1.02084	-0.0192227
24.5	0.403697	0.871793	0.116759
24.75	0.260134	0.741078	-0.0805262
25	0.129992	0.591168	-0.09451
25.25	-0.0372655	0.290331	-0.0857168
25.5	-0.142628	0.156961	-0.176216
25.75	-0.151912	-0.031024	0.00483495
26	-0.401563	-0.105272	-0.0961391
26.25	-0.172037	-0.3641	-0.113689
26.5	-0.172834	-0.31267	-0.192812
26.75	-0.102918	-0.35491	-0.129376
27	-0.204444	-0.30787	-0.054981
27.25	-0.175162	-0.451424	-0.0642038
27.5	-0.178929	-0.284534	-0.0551216
27.75	-0.109498	-0.418714	-0.1583
28	-0.151001	-0.414356	-0.111912
28.25	-0.212987	-0.318808	-0.0823599
28.5	-0.187801	-0.277495	-0.020184
28.75	-0.1694	-0.266616	0.0411324
29	-0.0789395	-0.252878	0.125855
29.25	-0.0858627	-0.214042	0.0441382
29.5	-0.095591	-0.200791	-0.0542302
29.75	-0.13035	-0.362247	-0.0466363
30	-0.130891	-0.451393	0.161422
30.25	-0.155734	-0.0570379	0.118398
30.5	-0.219999	-0.0751076	-0.0222184
30.75	-0.158606	-0.305876	0.210518
31	-0.0479315	-0.138511	0.0583475
31.25	-0.0244233	-0.15266	0.100867
31.5	-0.0441795	-0.108622	-0.0196446
31.75	-0.0359171	0.0924319	0.0413088
32	-0.00610563	-0.084356	-0.0620052
32.25	0.0697504	-0.26786	0.0423894
32.5	0.0451083	-0.0288616	-0.0386036
32.75	0.122174	0.141923	0.0812604
33	0.395291	0.280483	-0.171175
33.25	0.653599	0.435306	-0.0498423
33.5	0.836642	0.618009	-0.124202
33.75	1.09246	0.479964	-0.20558
34	1.25927	0.415312	-0.0334373
34.25	1.23294	0.209851	-0.127611
34.5	1.04455	0.252429	-0.012198
34.75	1.12389	0.347223	0.100627
35	1.07638	0.366709	-0.0235812
35.25	1.08261	0.488663	0.0471054
35.5	0.753422	0.363241	0.0722523
35.75	0.582467	0.30202	0.101686
36	0.275501	0.135423	0.0835665
36.25	0.142782	0.248069	0.0677938
36.5	-0.182279	-0.0343063	0.0746249
36.75	-0.241175	-0.205239	-0.0782608
37	-0.491272	-0.374309	-0.0633747
37.25	-0.553718	-0.375891	0.0196643
37.5	-0.690004	-0.391627	-0.0437255
37.75	-0.646063	-0.354224	0.0965885
38	-0.549994	-0.378067	-0.000596732
38.25	-0.656163	-0.306127	0.0131503
38.5	-0.48193	-0.34672	-0.0190792
38.75	-0.586198	-0.348805	0.0476243
39	-0.521321	-0.12916	-0.0910089
39.25	-0.513794	-0.317513	0.0262304
39.5	-0.491007	-0.337059	0.074885
39.75	-0.565678	-0.295605	0.167097
40	-0.346857	-0.243172	-0.0304559
40.25	-0.3854	-0.261078	-0.0716494
40.5	-0.349445	-0.168869	-0.1775
40.75	-0.384386	-0.252371	-0.429511
41	-0.250321	-0.28699	-0.237625
41.25	-0.161252	-0.102335	-0.147657
41.5	-0.170799	-0.20574	-0.00550233
41.75	-0.164792	-0.259767	-0.0799815
42	-0.159208	-0.130592	0.0337667
42.25	-0.302421	-0.0787208	0.379368
42.5	0.0137113	0.11994	0.345819
42.75	-0.224041	0.168925	0.341174
43	-0.182494	0.363473	0.313164
43.25	-0.207266	0.517264	0.340411
43.5	-0.011462	0.599146	0.228534
43.75	0.0481315	0.564582	0.166754
44	0.0312656	0.563211	0.0665538
44.25	-0.0538038	0.292423	0.115096
44.5	-0.191132	0.352289	-0.0195964
44.75	0.0840305	0.112007	0.122815
45	0.156209	0.270548	0.0202351
45.25	0.148025	-0.106155	-0.0664565
45.5	0.183153	-0.21541	-0.0992103
45.75	0.24145	-0.23877	-0.104222
46	-0.0111766	-0.327993	0.0796459
46.25	0.0457837	-0.255179	0.0387584
46.5	0.00214706	-0.451228	-0.116198
46.75	0.0606667	-0.44324	0.0712553
47	-0.0239999	-0.38056	-0.0745239
47.25	0.0051186	-0.274146	0.0100522
47.5	-0.04513	-0.184909	0.053654
47.75	-0.0921029	-0.397849	-0.0698893
48	-0.121503	-0.245967	0.0221562
48.25	-0.235242	-0.42967	-0.0461681
48.5	-0.0358189	-0.14076	-0.13828
48.75	0.0146024	-0.337557	0.0208644
49	-0.201116	-0.108232	-0.128021
49.25	-0.0408644	-0.274691	-0.282835
49.5	-0.188767	0.00944177	-0.0794397
49.75	-0.212947	-0.194664	-0.0854047
50	-0.139345	-0.00957358	-0.0414482
50.25	-0.0767276	-0.0308219	-0.0857004
50.5	0.0484121	-0.00709895	-0.211902
50.75	-0.00932351	-0.209123	-0.189675
51	-0.0208054	-0.297247	-0.0939962
51.25	0.0625421	-0.0590467	-0.0596157
51.5	-0.0572956	-0.245924	-0.0690835
51.75	-0.0518264	-0.158835	-0.0142055
52	-0.0470305	-0.184345	0.0864582
52.25	-0.00346839	0.0423158	0.166897
52.5	-0.0728734	0.352047	-0.0632972
52.75	0.0482892	0.571411	0.169805
53	-0.0416287	0.919874	-0.040061
53.25	-0.000819241	0.653568	0.0156766
53.5	0.0827872	0.678807	0.137453
53.75	0.12591	0.542183	0.132381
54	-0.0324581	0.379378	0.0272842
54.25	0.125237	0.257567	-0.00546443
54.5	0.0623152	0.0586435	0.196448
54.75	0.0574599	0.0202367	-0.0250762
55	-0.00238817	-0.0104145	0.195838
55.25	-0.0865519	-0.157546	0.0290153
55.5	-0.152999	-0.247058	-0.0545271
55.75	-0.0011612	-0.26461	-0.0663376
56	-0.11856	-0.305417	-0.151856
56.25	0.107032	-0.331108	0.0129081
56.5	-0.00270211	-0.497749	-0.130735
56.75	0.0402577	-0.392298	0.0153972
57	-0.0729072	-0.216653	-0.0836429
57.25	-0.0796391	-0.320968	0.0322522
57.5	-0.00863196	-0.283107	0.00346896
57.75	-0.0784538	-0.298436	-0.0940033
58	-0.0707287	-0.242609	0.0110781
58.25	0.0523146	-0.0662682	0.0597845
58.5	0.018811	-0.216189	-0.0539284
58.75	0.0507646	-0.545711	-0.163391
59	-0.0183572	-0.596718	-0.148921
59.25	0.0322933	-0.644227	0.0620901
59.5	0.0564448	-0.331301	-0.134105
59.75	0.0387755	-0.1032	-0.185315
60	-0.0240008	-0.0435789	-0.01133
60.25	0.0390497	-0.0751994	-0.186478
60.5	-0.034479	-0.110972	0.191127
60.75	-0.048633	-0.0876297	0.00166762
61	0.00333442	0.0843469	0.109055
61.25	0.122358	0.0637422	0.0701529
61.5	-0.0935693	-0.0403005	-0.120338
61.75	0.185158	-0.0754087	0.0805225
62	0.0132604	0.269137	0.135557
62.25	-0.0465575	0.550827	0.0106812
62.5	0.00785544	0.502885	0.014
62.75	0.0410722	0.725873	-0.10598
63	0.116552	0.609325	0.00500079
63.25	0.0293665	0.687772	-0.00244083
63.5	-0.0626847	0.502431	-0.010191
63.75	0.205487	0.505868	-0.0198783
64	0.422931	0.326253	0.032337
64.25	0.65422	0.116665	0.0219745
64.5	0.586901	-0.0293644	0.0469299
64.75	1.00487	-0.17503	-0.143992
65	1.04992	-0.372807	-0.0155144
65.25	0.897068	-0.333007	0.0509546
65.5	0.672435	-0.297305	0.0431148
65.75	0.449101	-0.181436	0.0246018
66	0.307103	-0.261138	-0.120714
66.25	-0.041758	-0.23704	-0.0570618
66.5	-0.280801	-0.294477	0.0800171
66.75	-0.475435	-0.133958	0.0473398
67	-0.535264	-0.17733	-0.0493112
67.25	-0.53306	-0.150341	-0.0722463
67.5	-0.471731	-0.18813	0.0573329
67.75	-0.403903	-0.33151	0.0301407
68	-0.488745	-0.371768	0.07971
68.25	-0.400751	-0.146571	-0.0461956
68.5	-0.401628	-0.310899	-0.0768186
68.75	-0.292095	-0.189205	0.196454
69	-0.455249	-0.311381	0.180689
69.25	-0.165381	-0.26273	0.216398
69.5	-0.183209	-0.0766815	0.701305
69.75	-0.189368	-0.118185	0.929652
70	-0.0655444	-0.12905	1.16055
70.25	-0.130239	-0.0797947	1.33462
70.5	-0.0534772	-0.190715	1.19025
70.75	-0.206041	-0.273036	1.01719
71	-0.1274	-0.268215	0.933074
71.25	-0.153232	-0.182135	0.565469
71.5	-0.278606	-0.17511	0.237886
71.75	-0.257975	0.238548	0.0861053
72	-0.103752	0.418198	-0.200003
72.25	-0.199481	0.725833	-0.245468
72.5	-0.044141	0.896378	-0.376561
72.75	-0.0708541	1.06526	-0.608578
73	-0.0517061	0.958758	-0.442979
73.25	-0.063004	0.680482	-0.364146
73.5	0.0264037	0.816746	-0.38521
73.75	-0.11386	0.526923	-0.440578
74	0.0970274	0.574135	-0.346369
74.25	0.103429	0.244913	-0.367613
74.5	-0.015253	0.0675539	-0.498215
74.75	-0.0797887	-0.184921	-0.377162
75	-0.147611	-0.115482	-0.262016
75.25	-0.243468	-0.410356	-0.357952
75.5	-0.106991	-0.411949	-0.378524
75.75	-0.202353	-0.447504	-0.395954
76	-0.113177	-0.510329	-0.29179
76.25	-0.102377	-0.650469	-0.368525
76.5	-0.0616625	-0.57258	-0.365966
76.75	0.0240409	-0.581788	-0.28219
77	-0.0260313	-0.425374	-0.328388
77.25	0.102051	-0.306627	-0.297127
77.5	-0.0492528	-0.439746	-0.101596
77.75	0.00904272	-0.250244	-0.319406
78	-0.109371	-0.259103	-0.214346
78.25	-0.09902	-0.199957	-0.0422496
78.5	-0.194541	-0.113689	-0.188276
78.75	-0.102576	-0.17291	-0.21452
79	0.0203568	-0.125613	-0.19814
79.25	-0.106896	-0.334379	-0.241275
79.5	-0.151732	-0.263011	-0.157576
79.75	-0.0948951	-0.302672	-0.18997
80	-0.0878343	-0.258181	-0.119014
80.25	0.0539373	-0.129576	-0.159362
80.5	-0.117503	-0.222227	-0.114255
80.75	-0.0890799	-0.312766	-0.10411
81	-0.062473	-0.149547	-0.064986
81.25	-0.0350643	-0.300016	0.0119833
81.5	0.0613864	-0.0714699	-0.0645629
81.75	-0.0909436	-0.343522	-0.131775
82	0.0764634	-0.159242	-0.114661
82.25	-0.0546968	-0.160002	0.0587531
82.5	-0.0118033	0.0127356	-0.163997
82.75	0.0755979	-0.0633549	-0.000957587
83	0.0519211	-0.193251	-0.0609701
83.25	0.206354	-0.0541882	-0.105566
83.5	0.126538	0.0781415	-0.0150754
83.75	0.0591528	0.0129108	-0.158715
84	0.102971	0.356397	-0.0774136
84.25	-0.0189913	0.266478	0.0524542
84.5	-0.0296593	0.25747	-0.0157574
84.75	-0.0964551	0.0949005	-0.110513
85	-0.0203982	-0.0864447	0.0313328
85.25	0.0128525	-0.214761	-0.10527
85.5	-0.199639	-0.262553	-0.16458
85.75	-0.0365324	-0.260001	-0.061902
86	0.0213536	-0.224541	-0.0536369
86.25	-0.0827763	-0.430204	0.0160544
86.5	0.0330897	-0.290714	-0.229528
86.75	-0.0510684	-0.223159	-0.17426
87	0.0888496	-0.360841	-0.0722921
87.25	-0.0516922	-0.271841	-0.0841082
87.5	-0.0917754	-0.100976	-0.0264886
87.75	-0.0498054	-0.149988	-0.227219
88	-0.0849683	-0.159847	-0.30812
88.25	-0.195738	-0.048035	-0.159898
88.5	-0.232655	-0.228756	0.0392632
88.75	-0.139632	-0.291468	-0.0182402
89	-0.0754797	0.0672865	0.0417719
89.25	-0.044983	0.0471002	0.0323565
89.5	0.0549155	0.105818	-0.118905
89.75	0.00908532	0.116504	0.0407253
90	0.0632567	0.0377294	-0.169615
90.25	0.0271757	-0.0131743	0.00966054
90.5	0.0382831	-0.0586789	-0.090927
90.75	0.0935968	-0.0729888	-0.0156344
91	0.126447	-0.00260434	-0.123276
91.25	0.313207	0.21897	0.0981754
91.5	0.593528	0.468166	-0.00704485
91.75	0.951643	0.777325	-0.00853475
92	1.27271	0.8991	-0.0711655
92.25	1.18171	0.730389	-0.0322705
92.5	1.1306	0.584279	-0.0728847
92.75	0.853525	0.5661	-0.0863105
93	0.862387	0.463026	-0.221296
93.25	0.618334	0.180888	-0.0964984
93.5	0.134239	-0.0392817	-0.18026
93.75	0.193414	-0.123902	-0.0259673
94	-0.0576403	-0.205463	-0.0624395
94.25	-0.23856	-0.148157	0.0945838
94.5	-0.195712	-0.456668	0.0351845
94.75	-0.164356	-0.421565	0.154596
95	-0.28021	-0.40079	0.122753
