# Supplementary material for: Corticothalamic gating of population auditory thalamocortical transmission in mouse
Source: eLife. 2021 May 24;10:e56645. doi: 10.7554/eLife.56645 (PMC8186908; doi:10.7554/eLife.56645)
Supplement: Figure 6—figure supplement 1—source data 2. [file elife-56645-fig6-figsupp1-data2.xlsx]

## Sheet: Figure 6-figure supplement 1D
	Control		CNO			The percentage of ON cortical responses
Experiment date	ON	OFF	ON	OFF		Control	CNO
2017-07-13	3	7	6	4		30	60
2017-11-22	7	3	8	2		70	80
2017-11-23	6	4	7	3		60	70
2018-07-13	16	4	20	0		80	100
