# Supplementary material for: Corticothalamic gating of population auditory thalamocortical transmission in mouse
Source: eLife. 2021 May 24;10:e56645. doi: 10.7554/eLife.56645 (PMC8186908; doi:10.7554/eLife.56645)
Supplement: Figure 6—figure supplement 1—source data 3. [file elife-56645-fig6-figsupp1-data3.xlsx]

## Sheet: Figure 6-figure supplement 1E
		Control		CNO			The percentage of ON cortical responses
Exp		ON	OFF	ON	OFF		Control	CNO
2020-10-15	Animal#1	6	4	6	4		60	60
	Animal#2	7	1	5	3		87.5	62.5
2020-10-18	Animal#3	5	3	4	4		62.5	50
2020-10-19	Animal#4	8	2	8	2		80	80
	Animal#5	7	3	8	2		70	80
