# Supplementary material for: Corticothalamic gating of population auditory thalamocortical transmission in mouse
Source: eLife. 2021 May 24;10:e56645. doi: 10.7554/eLife.56645 (PMC8186908; doi:10.7554/eLife.56645)
Supplement: Figure 6—figure supplement 1—source data 4. [file elife-56645-fig6-figsupp1-data4.xlsx]

## Sheet: Figure 6-figure supplement 1G
Time	Df/f (cortex)
(s)	Control	NBQX_TRN	Wash
0.25	-0.168256	-0.257079	-0.144887
0.5	-0.292734	-0.216031	-0.266932
0.75	-0.224408	-0.115672	-0.155213
1	-0.26183	-0.0414863	-0.0805571
1.25	-0.158499	-0.220148	-0.130641
1.5	-0.267875	-0.0975492	-0.127263
1.75	-0.15675	-0.425088	-0.0432551
2	-0.141231	-0.218322	-0.20115
2.25	-0.203672	-0.113489	-0.215142
2.5	-0.344511	-0.00502563	-0.153323
2.75	-0.260677	-0.0180857	-0.196664
3	-0.154918	0.0667504	-0.0775694
3.25	0.23025	0.57544	-0.17325
3.5	0.609464	0.90697	0.058264
3.75	0.696239	1.14877	0.359633
4	1.23564	1.46908	0.643939
4.25	1.44092	1.49898	0.848307
4.5	2.03536	1.62004	0.857418
4.75	2.1252	1.5517	0.948811
5	1.95921	1.58898	1.01587
5.25	1.9633	1.41831	0.796464
5.5	1.63472	1.1442	0.633874
5.75	1.69581	0.821756	0.333875
6	1.39137	0.497308	0.215344
6.25	1.05951	0.287137	0.067827
6.5	0.512312	-0.0236459	-0.042121
6.75	0.0221316	-0.12126	-0.253571
7	-0.153146	-0.14792	-0.136704
7.25	-0.287071	-0.515819	-0.201795
7.5	-0.78633	-0.634127	-0.446748
7.75	-0.654447	-0.60569	-0.330817
8	-0.815011	-0.693624	-0.403462
8.25	-0.582405	-0.653734	-0.258731
8.5	-0.907056	-0.478411	-0.227565
8.75	-0.991156	-0.721396	-0.630832
9	-0.883675	-0.765275	-0.634065
9.25	-0.745793	-0.647211	-0.587737
9.5	-0.973048	-0.635365	-0.34899
9.75	-0.737683	-0.610159	-0.447437
10	-0.751685	-0.55204	-0.671144
10.25	-0.631786	-0.527583	-0.380925
10.5	-0.456039	-0.568281	-0.468906
10.75	-0.755662	-0.450345	-0.492267
11	-0.680834	-0.523461	-0.551254
11.25	-0.579641	-0.396417	-0.576165
11.5	-0.620671	-0.394888	-0.411657
11.75	-0.469342	-0.350596	-0.450452
12	-0.500471	-0.326219	-0.341053
12.25	-0.396864	-0.298659	-0.246232
12.5	-0.356623	-0.177976	-0.265829
12.75	-0.4868	-0.150049	-0.465731
13	-0.410924	-0.0163333	-0.294268
13.25	0.258478	0.184855	-0.172246
13.5	0.246378	0.655574	-0.00739313
13.75	0.84224	1.07908	0.124783
14	1.12017	1.17634	0.31537
14.25	1.10618	1.07817	1.00711
14.5	1.31825	1.38027	1.0172
14.75	1.1605	1.0689	0.901736
15	1.26352	1.04285	1.00453
15.25	1.1122	0.696477	0.824512
15.5	1.06208	0.516953	0.455872
15.75	0.581739	0.20054	0.296689
16	0.238505	-0.402366	0.242555
16.25	0.160499	-0.460334	0.00121914
16.5	-0.500304	-0.352314	0.00927042
16.75	-0.630422	-0.616416	-0.43338
17	-0.682787	-0.669793	-0.43498
17.25	-0.725698	-0.706009	-0.246524
17.5	-0.86419	-0.800809	-0.204615
17.75	-0.900156	-0.891721	-0.233311
18	-0.940388	-0.65348	-0.331718
18.25	-0.797958	-0.685138	-0.279552
18.5	-0.74905	-0.738665	-0.404723
18.75	-0.670364	-0.566921	-0.188541
19	-0.747401	-0.60173	-0.276814
19.25	-0.539419	-0.586415	-0.220385
19.5	-0.74767	-0.485952	-0.163311
19.75	-0.591259	-0.427495	-0.340685
20	-0.568099	-0.52853	-0.285417
20.25	-0.5532	-0.49448	-0.246305
20.5	-0.74036	-0.596419	-0.314229
20.75	-0.403447	-0.524272	-0.23844
21	-0.371735	-0.361334	-0.391518
21.25	-0.422888	-0.332866	-0.151072
21.5	-0.327146	-0.330131	-0.21539
21.75	-0.46823	-0.373503	-0.154151
22	-0.521524	-0.41171	-0.334781
22.25	-0.520076	-0.330303	-0.249465
22.5	-0.777991	-0.238835	-0.171638
22.75	-0.503903	-0.0228376	0.0108637
23	0.118633	0.33364	-0.0476166
23.25	0.451653	0.461116	-0.211503
23.5	0.808793	0.676806	-0.18442
23.75	1.19553	0.611684	-0.203452
24	1.38923	0.455546	-0.194648
24.25	1.34921	0.52779	-0.0526379
24.5	1.20987	0.313915	-0.0751408
24.75	0.997152	0.0578295	-0.149549
25	0.712008	-0.28083	-0.0776374
25.25	0.412599	-0.390525	-0.0321471
25.5	-0.105742	-0.267657	-0.202557
25.75	0.0117767	-0.224436	-0.259807
26	-0.386316	-0.287317	-0.112616
26.25	-0.482199	-0.204651	-0.0398606
26.5	-0.431879	-0.229947	-0.273332
26.75	-0.406737	-0.393452	-0.327402
27	-0.489799	-0.328571	-0.114475
27.25	-0.483735	-0.321499	-0.108302
27.5	-0.248775	-0.344157	-0.353513
27.75	-0.435129	-0.374827	-0.306328
28	-0.452611	-0.387163	-0.0766915
28.25	-0.365435	-0.191545	0.00199522
28.5	-0.36793	-0.193331	-0.180479
28.75	-0.492862	-0.262085	-0.181044
29	-0.276408	-0.335271	-0.0183835
29.25	-0.147025	-0.367056	-0.0978981
29.5	-0.427562	-0.218598	-0.0825037
29.75	-0.27221	-0.222081	-0.056177
30	-0.424639	-0.251704	-0.0594283
30.25	-0.311395	-0.28626	-0.0693696
30.5	-0.276818	-0.301639	0.0154142
30.75	-0.391596	-0.135816	-0.0278468
31	-0.26552	-0.181473	0.0194082
31.25	-0.292016	-0.132917	0.0674032
31.5	-0.0439279	-0.312913	0.0345622
31.75	-0.297892	-0.252861	0.107683
32	-0.349925	-0.198579	0.045509
32.25	-0.457576	0.0555232	-0.00869538
32.5	-0.295628	0.262706	-0.0407742
32.75	-0.452146	0.331789	0.258071
33	-0.00976656	0.96642	0.269666
33.25	-0.082198	0.972988	0.521294
33.5	-0.0759201	1.39936	0.471052
33.75	0.019852	1.00604	0.531569
34	-0.084779	1.41494	0.857565
34.25	-0.0936424	1.13226	0.937888
34.5	-0.13215	0.874018	0.770728
34.75	0.0189237	0.710068	0.640547
35	0.0305965	0.557087	0.590629
35.25	-0.0331158	0.0619656	0.45129
35.5	-0.12992	-0.0856746	0.315406
35.75	-0.0331252	-0.168849	0.11093
36	-0.158373	-0.310656	0.321299
36.25	-0.110751	-0.343971	0.00687279
36.5	0.0735377	-0.364624	-0.259975
36.75	0.0691248	-0.326763	-0.392588
37	0.0467084	-0.320811	-0.467656
37.25	-0.0372347	-0.368637	-0.35363
37.5	-0.106982	-0.52722	-0.625191
37.75	-0.169808	-0.184923	-0.422711
38	-0.0252535	-0.533757	-0.313454
38.25	-0.143965	-0.533242	-0.358729
38.5	-0.205893	-0.537429	-0.349584
38.75	-0.14054	-0.289036	-0.150041
39	-0.0208541	-0.487318	-0.203229
39.25	-0.0792961	-0.284771	-0.459285
39.5	-0.279038	-0.229508	-0.0563683
39.75	-0.183049	-0.0995507	-0.264593
40	-0.355465	-0.0731533	-0.13411
40.25	-0.0281546	-0.178793	0.0240093
40.5	-0.116765	0.0345398	-0.134382
40.75	-0.0471697	-0.178173	-0.0217964
41	-0.154806	-0.132576	0.0225287
41.25	-0.0114054	-0.105549	-0.043095
41.5	-0.115905	-0.292495	-0.0589575
41.75	-0.109297	-0.239764	-0.151854
42	0.0573591	0.00433204	-0.183066
42.25	0.175237	0.169557	-0.0542758
42.5	0.615275	0.592704	-0.196253
42.75	0.887374	0.83577	-0.125645
43	1.13617	1.21841	0.202299
43.25	1.44493	1.55301	0.361916
43.5	1.82565	1.34461	0.38536
43.75	2.01987	1.33193	0.372115
44	1.87394	1.22714	0.211496
44.25	1.95769	0.758877	0.175786
44.5	1.81246	0.544417	0.0730025
44.75	1.50711	0.251334	-0.00124494
45	1.19088	0.154723	-0.0148353
45.25	0.910745	-0.156587	-0.139697
45.5	0.60156	-0.352698	-0.216066
45.75	0.363516	-0.310196	-0.0966685
46	0.0156611	-0.334884	-0.279439
46.25	-0.252788	-0.431351	-0.202124
46.5	-0.33185	-0.488268	-0.277459
46.75	-0.549864	-0.340008	-0.385548
47	-0.569145	-0.282043	-0.291122
47.25	-0.750422	-0.254592	-0.149709
47.5	-0.371594	-0.450465	-0.264576
47.75	-0.507539	-0.375082	-0.299439
48	-0.2805	-0.153297	-0.262846
48.25	-0.460368	-0.203729	-0.155948
48.5	-0.4852	-0.333823	-0.0469485
48.75	-0.349503	-0.139571	0.0183782
49	-0.297548	-0.240131	-0.130996
49.25	-0.202218	-0.157539	-0.193185
49.5	-0.433394	-0.537814	-0.239221
49.75	-0.489101	-0.530781	-0.172877
50	-0.40327	-0.387734	-0.172695
50.25	-0.233727	-0.481079	-0.24842
50.5	-0.249349	-0.301497	-0.329897
50.75	-0.419275	-0.345641	-0.065508
51	-0.340057	-0.159185	0.0156872
51.25	-0.296431	-0.0995527	-0.0924354
51.5	-0.179381	-0.161405	-0.0737861
51.75	-0.21649	-0.20119	-0.0229333
52	-0.211339	0.0238037	0.0785532
52.25	0.0828204	0.350177	0.0171971
52.5	-0.292995	0.528458	0.0423947
52.75	-0.0987511	0.899461	0.00448854
53	-0.0881888	0.954835	-0.0199419
53.25	-0.225052	1.33453	-0.0436375
53.5	-0.132202	1.43584	-0.0438864
53.75	-0.328684	1.18567	-0.197004
54	0.0755005	1.01161	-0.10201
54.25	-0.302639	0.844919	-0.121479
54.5	-0.257811	0.554689	-0.187836
54.75	-0.272258	0.212996	-0.25977
55	-0.0815392	0.0463466	-0.272341
55.25	-0.238093	-0.128024	-0.288181
55.5	-0.353221	-0.233064	-0.227104
55.75	-0.298697	-0.390415	-0.119464
56	-0.241868	-0.180709	-0.151765
56.25	-0.31117	-0.385914	0.0292724
56.5	-0.525159	-0.231472	-0.185856
56.75	-0.207829	-0.359199	0.0392907
57	-0.264344	-0.467013	0.0377841
57.25	-0.266988	-0.285019	-0.152673
57.5	-0.310116	-0.3555	-0.0881161
57.75	-0.0832264	-0.286459	-0.0302927
58	-0.275257	-0.359061	-0.0205322
58.25	-0.183899	-0.515557	-0.00751829
58.5	-0.0251563	-0.160841	0.0160284
58.75	-0.229011	-0.113412	-0.118925
59	-0.160181	-0.230807	-0.148769
59.25	-0.367935	-0.111855	-0.095184
59.5	-0.141405	-0.0390331	-0.069903
59.75	-0.0166974	-0.118035	-0.211995
60	-0.139575	-0.170142	-0.199998
60.25	0.0352849	-0.242923	0.0952593
60.5	0.210547	-0.202456	0.0320984
60.75	-0.100209	-0.185769	-0.0213066
61	-0.0239485	-0.161756	-0.0398675
61.25	-0.0331062	-0.166658	-0.188832
61.5	-0.125484	-0.0942553	-0.101076
61.75	-0.189824	-0.0480713	0.0499201
62	0.160502	0.303191	0.111139
62.25	0.514827	0.682929	0.159039
62.5	0.844201	0.878095	0.423568
62.75	1.09933	1.18601	0.570441
63	1.31817	1.30141	0.791879
63.25	1.44578	1.3757	0.971949
63.5	1.39757	1.43715	0.974092
63.75	0.940614	1.31547	1.00104
64	0.917114	0.952304	1.07995
64.25	0.678755	0.499263	0.871967
64.5	0.536796	0.326665	0.765971
64.75	0.0915793	-0.00440261	0.66303
65	-0.0282216	-0.0751021	0.411094
65.25	-0.202981	-0.331876	0.138255
65.5	-0.373023	-0.34958	-0.101565
65.75	-0.424534	-0.572227	-0.0424912
66	-0.405836	-0.806477	-0.148395
66.25	-0.310566	-0.631189	-0.10937
66.5	-0.295792	-0.575206	-0.245153
66.75	-0.300333	-0.158628	-0.388233
67	-0.236815	-0.360644	-0.444774
67.25	-0.207438	-0.582184	-0.304621
67.5	-0.309899	-0.430759	-0.267217
67.75	-0.16189	-0.350569	-0.233447
68	-0.0887674	-0.326477	-0.410165
68.25	-0.104681	-0.543394	-0.433681
68.5	-0.179797	-0.338851	-0.391823
68.75	-0.220672	-0.43813	-0.413923
69	-0.171178	-0.520786	-0.240661
69.25	-0.237986	-0.43949	-0.196562
69.5	-0.170367	-0.337426	-0.188694
69.75	-0.186962	-0.578329	-0.21041
70	-0.383738	-0.374736	-0.0945526
70.25	-0.191484	-0.1888	-0.0776716
70.5	-0.424039	-0.214203	-0.183029
70.75	-0.45184	-0.106058	-0.226682
71	-0.242826	-0.0768692	-0.238215
71.25	-0.244816	-0.0189822	-0.111425
71.5	-0.251833	0.0841688	-0.299655
71.75	-0.293008	0.403023	-0.131922
72	-0.131065	0.880661	-0.202571
72.25	0.0796718	0.919589	-0.28924
72.5	0.215547	0.921609	-0.194744
72.75	0.517624	0.975399	-0.171092
73	0.746754	0.905755	-0.17766
73.25	1.14507	0.525422	-0.16623
73.5	1.45645	0.357145	-0.0850026
73.75	1.44461	0.15567	-0.018249
74	1.3711	0.199598	-0.0117607
74.25	1.32408	-0.120695	-0.141341
74.5	1.3353	-0.102407	-0.117359
74.75	1.13755	-0.183058	-0.157675
75	1.10679	-0.285465	-0.178982
75.25	0.589046	-0.373619	-0.123703
