# Supplementary material for: Corticothalamic gating of population auditory thalamocortical transmission in mouse
Source: eLife. 2021 May 24;10:e56645. doi: 10.7554/eLife.56645 (PMC8186908; doi:10.7554/eLife.56645)
Supplement: Figure 6—figure supplement 1—source data 5. [file elife-56645-fig6-figsupp1-data5.xlsx]

## Sheet: Figure 6-figure supplement 1H
	CONTROL		40uM_NBQX_TRN			The percentage of ON cortical responses
Experiment date	ON	OFF	ON	OFF		Control	NBQX
2018-05-24	5	3	7	1		62.5	87.5
2018-05-25	5	3	6	2		62.5	75
2018-06-07	6	2	8	0		75	100
2018-07-25	5	8	6	7		38.4615	46.1538
2018-07-26	3	10	7	6		23.0769	53.8462
2018-07-31	5	8	11	2		38.4615	84.6154
2018-07-01	5	3	7	1		62.5	87.5
2018-07-01	6	2	8	0		75	100
