# Supplementary material for: Corticothalamic gating of population auditory thalamocortical transmission in mouse
Source: eLife. 2021 May 24;10:e56645. doi: 10.7554/eLife.56645 (PMC8186908; doi:10.7554/eLife.56645)
Supplement: Figure 6—source data 1. [file elife-56645-fig6-data1.xlsx]

## Sheet: Figure 6D
		No light		Light			The percentage of ON cortical responses
Experiment date		ON	OFF	ON	OFF		Nolight	Light
2018-04-26
	Trial 1	5	3	8	0		62.5	100
	Trial 2	5	3	8	0		62.5	100
	Trial 3	7	1	8	0		87.5	100
2018-04-29
	Trial 4	4	4	6	2		50	75
2018-07-14
	Trial 5	5	3	6	2		62.5	75
	Trial 6	6	2	6	2		75	75
	Trial 7	13	3	15	1		81.25	93.75
	Trial 8	13	3	15	1		81.25	93.75
2018-07-15
	Trial 9	6	2	8	0		75	100
	Trial 10	7	1	8	0		87.5	100
	Trial 11	5	3	7	1		62.5	87.5
	Trial 12	6	2	8	0		75	100
	Trial 13	6	2	7	1		75	87.5
	Trial 14	19	5	22	2		79.1667	91.6667
	Trial 15	10	6	12	4		62.5	75
	Trial 16	5	3	6	2		62.5	75
