# Supplementary material for: Corticothalamic gating of population auditory thalamocortical transmission in mouse
Source: eLife. 2021 May 24;10:e56645. doi: 10.7554/eLife.56645 (PMC8186908; doi:10.7554/eLife.56645)
Supplement: Figure 6—source data 2. [file elife-56645-fig6-data2.xlsx]

## Sheet: Figure 6H
		No light		Light			The percentage of ON cortical responses
		ON	OFF	ON	OFF		Nolight	Light
Collected from 5 animals	Trial #1	5	5	8	2		50	80
2020-10-26	Trial #2	5	5	5	5		50	50
2020-10-27	Trial #3	7	3	9	1		70	90
2020-10-28	Trial #4	7	3	9	1		70	90
	Trial #5	3	5	3	5		37.5	37.5
	Trial #6	5	3	4	4		62.5	50
	Trial #7	3	5	4	4		37.5	50
	Trial #8	6	2	6	2		75	75
	Trial #9	7	1	3	5		87.5	37.5
	Trial #10	7	1	3	5		87.5	37.5
	Trial #11	4	4	3	5		50	37.5
	Trial #12	3	5	3	5		37.5	37.5
	Trial #13	2	6	3	5		25	37.5
	Trial #14	3	5	3	5		37.5	37.5
	Trial #15	3	5	6	2		37.5	75
	Trial #16	5	3	5	3		62.5	62.5
	Trial #17	4	4	5	3		50	62.5
	Trial #18	4	4	7	1		50	87.5
	Trial #19	3	5	5	3		37.5	62.5
	Trial #20	3	5	5	3		37.5	62.5
	Trial #21	5	3	5	3		62.5	62.5
	Trial #22	5	3	4	4		62.5	50
	Trial #23	2	6	4	4		25	50
	Trial #24	2	6	3	5		25	37.5
	Trial #25	2	6	3	5		25	37.5
