# Supplementary material for: Corticothalamic gating of population auditory thalamocortical transmission in mouse
Source: eLife. 2021 May 24;10:e56645. doi: 10.7554/eLife.56645 (PMC8186908; doi:10.7554/eLife.56645)
Supplement: Figure 6—source data 3. [file elife-56645-fig6-data3.xlsx]

## Sheet: Figure 6L
		nolight		light			The percentage of ON cortical responses
Experiment date		ON	OFF	ON	OFF		NOLIGHT	LIGHT
2018-10-01
	Trial #1	6	2	6	2		75	75
	Trial #2	3	5	6	2		37.5	75
	Trial #3	3	5	3	5		37.5	37.5
	Trial #4	4	4	3	5		50	37.5
	Trial #5	3	5	4	4		37.5	50
	Trial #6	4	4	5	3		50	62.5
	Trial #7	3	5	5	3		37.5	62.5
	Trial #8	5	3	3	5		62.5	37.5
	Trial #9	3	5	3	5		37.5	37.5
2018-10-02	(animal 1)
	Trial #10	4	4	4	4		50	50
	Trial #11	6	2	7	1		75	87.5
	Trial #12	6	2	6	2		75	75
	Trial #13	4	4	4	4		50	50
	Trial #14	4	4	3	5		50	37.5
	Trial #15	5	3	5	3		62.5	62.5
	Trial #16	6	2	4	4		75	50
	Trial #17	4	4	4	4		50	50
	Trial #18	5	3	5	3		62.5	62.5
	Trial #19	4	4	5	3		50	62.5
2018-10-02	(animal 2)
	Trial #20	5	3	6	2		62.5	75
	Trial #21	5	3	4	4		62.5	50
	Trial #22	4	4	5	3		50	62.5
	Trial #23	6	2	4	4		75	50
	Trial #24	3	5	4	4		37.5	50
	Trial #25	6	2	4	4		75	50
	Trial #26	3	5	4	4		37.5	50
	Trial #27	3	5	4	4		37.5	50
2150-11-02
	Trial #28	11	5	11	5		68.75	68.75
	Trial #29	11	5	13	3		68.75	81.25
	Trial #30	11	5	9	7		68.75	56.25
	Trial #31	10	5	10	5		66.6667	66.6667
	Trial #32	8	8	10	6		50	62.5
	Trial #33	9	7	10	6		56.25	62.5
	Trial #34	7	9	13	3		43.75	81.25
	Trial #35	7	9	9	7		43.75	56.25
	Trial #36	9	7	9	7		56.25	56.25
	Trial #37	5	11	8	8		31.25	50
