# Supplementary material for: Corticothalamic gating of population auditory thalamocortical transmission in mouse
Source: eLife. 2021 May 24;10:e56645. doi: 10.7554/eLife.56645 (PMC8186908; doi:10.7554/eLife.56645)
Supplement: Figure 6—source data 4. [file elife-56645-fig6-data4.xlsx]

## Sheet: Figure 6P
	No light		Light			The percentage of ON cortical responses
Experiment date	ON	OFF	ON	OFF		Nolight	Light
2018-04-17	7	3	9	1		70	90
	9	1	8	2		90	80
2018-05-17	5	3	4	4		62.5	50
2018-06-04	4	4	5	3		50	62.5
	3	5	4	4		37.5	50
2018-06-05	6	2	6	2		75	75
	4	4	4	4		50	50
2018-06-07	5	3	6	2		62.5	75
	2	6	2	6		25	25
